# Supplementary material for: From Literature to Knowledge Graphs: Automated Extraction and Retrieval of Life Cycle Assessment Data with Large Language Models
Source: Research Square preprint supplement (doi:10.21203/rs.3.rs-8633241/v1), 2026-01-27
Supplement: Supplementary file 1 [file 128e7707af6d4985cd7d4536.xlsx]

## Sheet: LCA (ground-truth)
ID	Author, Year	Title	System boundary	System boundary (notes)	Functional unit	Functional unit (notes)	Reference product	Geography	Impact assessment method	Impact category	LCIA results (only GWP results)	Notes
1	Liu et al. 2020	Comprehensive analysis of environmental impacts and energy consumption of biomass-to-methanol and coal-to-methanol via life cycle assessment	Cradle-to-grave		79 t of methanol		Methanol	Not mentioned	CML 2001	Global warming potential (GWP), Acidification potential (AP), Human toxicity potential (HTP)	CTM process: 274, 428 kg CO2-eq, BTM process: Negative GHG emissions	from Fig. 4
2	Renó et al. 2011	A LCA (life cycle assessment) of the methanol production from sugarcane bagasse	Cradle-to-gate	Not mentioned directly in the text: The results of LCA of this work were compared with others studies, such as the work in Ref. [32] that conduced the LCA study of the ethanol from sugarcane with a system boundary that involves four stages of ethanol production: sugarcane farming and harvesting, sugar milling, ethanol conversion (by fermentation technology), and transportation during each stage.	1 kg of produced methanol		Methanol	Brazil	CML 2001	Abiotic depletion, Acidification, Eutrophication, Global warming potential, Ozone layer depletion, Human toxicity, Fresh water aquatic ecotoxicity, Marine aquatic ecotoxicity, Terrestrial ecotoxicity, Land competition, Photochemical oxidation	Methanol: 2.284 kg CO2-eq
3	Zhu et al. 2022	LCA comparison analysis for two types of H2 carriers: Methanol and ammonia	Cradle-to-grave		1 kg and 1 MJ of H2 carrier produced from coal, natural gas, and renewables		Methanol and Ammonia	China	CML 2001	Global warming potential (GWP), acidification potential, ozone depletion potential, photochemical ozone creation potential, eutrophication potential, and abiotic depletion potential	Coal-CH3OH (kg CO2-eq/kg): 3.09; NG-CH3OH (kg CO2-eq/kg): 0.84; PV/CCU-CH3OH (kg CO2-eq/kg): 1.04; Coal-NH3 (kg CO2-eq/kg): 3.93; NG-NH3 (kg CO2-eq/kg): 2.70; PV-NH3 (kg CO2-eq/kg): 0.78.	from table 2
4	Galusnyak et al. 2021	Life Cycle Assessment of Bio-methanol Derived from Various Raw-materials	Cradle-to-gate		1 ton of bio-methanol		Methanol	Not mentioned	ReCiPe	Global warming potential (GWP), freshwater eutrophication potential (FEP), ozone depletion potential (ODP), fossil depletion potential (FDP), freshwater ecotoxicity potential (FETP), human toxicity potential (HTP), metal depletion potential (MDP), photochemical oxidant formation potential (POFP) and terrestrial ecotoxicity potential (TETP)	Case1: 1117.23 kg CO2-eq./t MeOH; Case2: 6253.08 kg CO2-eq./t MeOH; Case3: 1383.42 kg CO2-eq./t MeOH; Case4: 435.13 kg CO2-eq./t MeOH; Case5: 522.57 kg CO2-eq./t MeOH; Case6: 848.77 kg CO2-eq./t MeOH; Case7: 392.71 kg CO2-eq./t MeOH; Case8: 1311.25 kg CO2-eq./t MeOH.	from Table 3
5	Galusnyak et al. 2023	From Secondary Biomass to Bio-Methanol through CONVERGE Technology: An Environmental Analysis	Cradle-to-gate		1 ton of bio-methanol		Methanol	Northern Sweden and Italy	ReCiPe	Climate change/Global Warming Potential (GWP), Freshwater Eutrophication Potential (FEP), Ozone Depletion Potential (ODP), Fossil fuel Depletion Potential (FDP), Freshwater Ecotoxicity Potential (FETP), Human Toxicity Potential (HTP), Mineral Depletion Potential (MDP), Photochemical Oxidant Formation Potential (POFP), Terrestrial Ecotoxicity Potential (TETP)	Case 1: 1436.19 kg CO2-eq./t MeOH, Case 2: 1288.04 kg CO2-eq./t MeOH, Case 3: 2511.22 kg CO2-eq./t MeOH, Case 1 (Nuclear Power): 1403.52 kg CO2-eq./t MeOH, Case 2 (Nuclear Power): 1261.66 kg CO2-eq./t MeOH, Case 1 (Hydro Power): 1413.53 kg CO2-eq./t MeOH, Case 2 (Hydro Power): 1269.74 kg CO2-eq./t MeOH	from Table 5
6	Fózer et al. 2021	Sustainability assessment of biomethanol production via hydrothermal gasification supported by artificial neural network	Cradle-to-gate		1 t of produced biomethanol		Methanol	Not mentioned	IMPACT2002 v2.14	Carcinogens, Non-carcinogens, Respiratory inorganics, Ionizing radiation, Ozone layer depletion, Respiratory organics, Aquatic ecotoxicity, Terrestrial ecotoxicity, Terrestrial acid/nutri, Land occupation, Aquatic acidification, Aquatic eutrophication, Global warming, Non-renewable energy, Mineral extraction	Hydrothermal gasification pathway (in-situ H2 boosting): -439 kg CO2-eq/t CH3OH; Hydrothermal gasification pathway (increased external H2 usage): -725 kg CO2-eq/t CH3OH.
7	Khoo et al. 2016	Bio-chemicals from lignocellulose feedstock: sustainability, LCA and the green conundrum	Cradle-to-gate		1 kg produced bio-chemical		Methanol, Formic acid, Acetone	Brazil, China, and Netherlands	not mentioned	Global warming potential (GWP), Acidification, Eutrophication, Human toxicity, Photochemical Ozone Creation Potential (POCP)	WS-Acetone: 5.9 kg CO2-eq/kg; RS-Acetone: 4.6 kg CO2-eq/kg; Fossil-Acetone: 2.3 kg CO2-eq/kg; WS-Formic Acid: 1.4 kg CO2-eq/kg; Stover-Formic Acid: 1.2 kg CO2-eq/kg; Fossil-Formic Acid: 2.4 kg CO2-eq/kg; RS-Methanol: 4.7 kg CO2-eq/kg; Bagasse-Methanol: 0.77 kg CO2-eq/kg; Fossil-Methanol: 0.52 kg CO2-eq/kg	from Fig. 7
8	Choe et al. 2022	Techno-economic and environmental assessments for sustainable bio-methanol production as landfill gas valorization	Gradle-to-gate	Not mentioned directly in the text: For this work, life cycle inventory was selected to be direct emissions and energy use in manufacture systems for each LFG treatment system, MeOH plant, and water electrolysis, and the functional unit was 1 kg of MeOH.	1 kg of MeOH		Methanol	Not mentioned	not mentioned	Global warming potential (GWP)	Case 1: 2.36 kg CO2-eq/kg MeOH; Case 2: 0.835 kg CO2-eq/kg MeOH, Case 3: 0.605 kg CO2-eq/kg MeOH
9	Budsberg et al. 2020	Production routes to bio-acetic acid: life cycle assessment	Cradle-to-biorefinery exit gate		1 tonne of acetic acid		Acetic acid	Not mentioned	not mentioned	Global Warming Potential (GWP), and Fossil Fuel Use (FFU).	EAX OC: 1000 kg CO2-eq./t; EAX LE: 2500 kg CO2-eq./t; ADX OC: -370 kg CO2-eq./t; ADX LE: 180 kg CO2-eq./t; Petro-acetic acid: 1000 kg CO2-eq./t.	from Table 1
10	Gadkari et al. 2021	Microbial electrosynthesis: is it sustainable for bioproduction of acetic acid?	Cradle-to-gate		1000 t per year of AA produced		Acetic acid	UK	IPCC 2013 GWP 100a	Global warming potential (GWP), Non-renewable energy use (NREU)	Scenario 1 (continuous mode) MES with 3D-GFCF: 11.80 kg CO2-eq. per kg AA, Scenario 2 (continuous mode) MES with 3D-GFCF: 1.31 kg CO2-eq. per kg AA, Scenario 3 (fed-batch mode) MES with 3D-GFCF: 12.30 kg CO2-eq. per kg AA, Scenario 4 (fed-batch mode) MES with 3D-GFCF: 1.81 kg CO2-eq. per kg AA, Fossil-based system Celanese process: 1.31 kg CO2-eq. per kg AA	from Table 2
11	Akmalina and Pawitra. 2020	Life cycle assessment of ethylene production from empty fruit bunch	Cradle-to-gate		1 kg of ethylene		Bioethylene	Indonesia	CML-impact assessment baseline methodology	Global warming potential (GWP), acidification, eutrophication, ozone depletion, and photochemical oxidant	Bioethylene: 1.15 kg CO2-eq/kg
12	Yang et al. 2018	Manufacturing Ethylene from Wet Shale Gas and Biomass: Comparative Technoeconomic Analysis and Environmental Life Cycle Assessment	Cradle-to-gate		1 kg of ethylene manufactured at the plant gate		Ethylene	Not mentioned	not mentioned	Global warming potential (GWP)	Shale-Gas-Based pathway: 1.4 kg CO2-eq/kg ethylene; Corn-stover-based pathway: -1.0 kg CO2-eq/kg ethylene, Corn-grain-based pathway: -0.5 kg CO2-eq/kg ethylene
13	Ghanta et al. 2014	Environmental impacts of ethylene production from diverse feedstocks and energy sources	Gate-to-gate, Cradle-to-gate, Cradle-to-gate		400,000 tonnes of ethylene/year, 1-kg ethylene produced (scaled)		Ethylene	USA	TRACI	Acidification, greenhouse gas emissions, ecotoxicity, human carcinogenic and non-carcinogenic effects, and eutrophication	Naphtha-based route: 198 million kg CO2-eq; Ethane-based route: 167 million kg CO2-eq; Ethanol-based route: 268 million kg CO2-eq.	from Table 2
14	Liptow et al. 2015	Life cycle assessment of biomass-based ethylene production in Sweden — is gasification or fermentation the environmentally preferable route?	Cradle-to-gate		50,000 t ethylene at the gate of the ethylene production plant		Ethylene	Sweden	not mentioned	Global warming (GWP), acidification (ACP), photochemical ozone creation (POCP), and eutrophication (EP)	Wood gasification (GROT): 1.3 kg CO2-eq./kg ethylene, Wood gasification (Mixed wood): 1.2 kg CO2-eq./kg ethylene, Wood fermentation: 1.6 kg CO2-eq./kg ethylene, Sugarcane fermentation: 2.1 kg CO2-eq./kg ethylene, Fossil oil-based: 1.9 kg CO2-eq./kg ethylene.
15	Khoo et al. 2020	LCA of electrochemical reduction of CO2 to ethylene	Cradle-to-gate		1 g C2H4 for the small-scale experimental set-up and a hypothetical case of 1 ton C2H4 production at larger scale		Ethylene	Singapore	CML 2001	Global warming potential (GWP), Acidification potential (AP), Eutrophication potential (EP), Human toxicity potential (HTP), Photochemical ozone creation potential (POCP)	Small-scale S-1: 3.6 g CO2-eq, Small-scale S-2: -3.70 g CO2-eq, Small-scale S-3: -0.98 g CO2-eq, Large-scale L-2: 3.0 t CO2-eq, Large-scale L-3: 0.651 t CO2-eq
16	Alonso-Fariñas et al. 2018	Environmental assessment of thermo-chemical processes for bio-ethylene production in comparison with bio-chemical and fossil-based ethylene	Cradle-to-gate		1 toneof ethylene		Bio-ethylene	Duero Valley (Castilla y Leon, Spain)	CML 2016	Abiotic depletion potential of elements (ADP elements), Abiotic depletion potential of fossil fuel resources (ADP fossil), Global warming potential (GWP), Ozone depletion potential (ODP), Human toxicity potential (HTP), Freshwater aquatic ecotoxicity potential (FAETP), Marine aquatic ecotoxicity potential (MAETP), Terrestrial ecotoxicity potential (TETP), Photochemical oxidants creation potential…	Case 1: 0.48 t CO2-eq/t; Case 2: 0.79 t CO2-eq/t; Case 3: -0.07 t CO2-eq/t	from Fig. 7
17	Hong et al. 2014	Life cycle assessment of corn- and cassava-based ethylene production	Cradle-to-gate		1 tonne of ethylene production		Ethylene	China	IMPACT2002+ and ReCiPe	Global warming potential (GWP), Respiratory inorganics, Land occupation, Non-renewable energy, Ozone layer depletion, Aquatic acidification, Aquatic eutrophication, Terrestrial acidification/nutrification, Human health, Ecosystem quality, Climate change, Resources depletion	Cassava-based scenario: 4.3 to 7.4 t CO2-eq, Corn-based scenario: 2.7 to 4.1 t CO2-eq
18	Oliveira et al. 2019	Bio-ethylene from sugarcane as a competitiveness strategy for the Brazilian chemical industry	Cradle-to-gate		Not mentioned		Ethylene	Brazil	not mentioned	Global warming potential (GWP)	Ethanol-to-ethylene route: 0.17 t CO2 eq/t ethylene; Methanol-to-ethylene route: 0.42 t CO2 eq/t ethylene	from Table 8 & 10
19	Xu et al. 2021	Comparative Life Cycle Assessment of Energy Consumption, Pollutant Emission, and Cost Analysis of Coal/Oil/Biomass to Ethylene Glycol	Cradle-to-gate		1 ton of ethylene glycol		Ethylene glycol	China	not mentioned	Global warming potential (GWP), acidification potential (AP), photochemical ozone, creation potential (POCP), nutrient enrichment (NE), and soot and ashes (SA)	CtEG: 7538 kg CO2-eq/t-EG, OtEG: 5202 kg CO2-eq/t-EG, BtEG: 3820 kg CO2-eq/t-EG	CtEG: from in-text, OtEG: from Figure 7, BtEG: from Figure 7
20	Zhao et al. 2021	Advancing development of biochemicals through the comprehensive evaluation of bio-ethylene glycol	Cradle-to-gate	Not mentioned directly in the text: The total life cycle of EG production covered all stages from the production of feedstock, transport of feedstock, feedstock pretreatment, to the transformation of feedstock into EG.	1 metric ton of EG		Ethylene glycol	China	not mentioned	Global warming potential (GWP)	Bio-EG: 0.8 t CO2-eq, Petro-EG: 2.7 t CO2-eq, Coal-EG: 11.6 t CO2-eq	Bio-EG: in-text, Petro-EG: in-text, Coal-EG: from Fig. 4
21	Tähkämö et al. 2022	Life cycle assessment of renewable liquid hydrocarbons, propylene, and polypropylene derived from bio-based waste and residues: Evaluation of climate change impacts and abiotic resource depletion potential	Cradle-to-gate, cradle-to-grave		1 kg of each studied intermediate product, i.e. RenLHCs, RenP, and RenPP, derived from the studied waste and residue raw materials, i.e. UCO, PFAD, AF, and FF		Renewable liquid hydrocarbons (RenLHCs), Renewable propylene (RenP), Renewable polypropylene (RenPP)	Rotterdam (The Netherlands), Singapore, and Porvoo (Finland)	CML 2001	Global warming potential (GWP), abiotic depletion potential (fossil fuels), land use, toxicity assessment, acidification potential, Water use	RenLHCs: -2.65 kg CO2-eq; RenP: -2.48 kg CO2-eq; RenPP: -2.24 kg CO2-eq.
22	Moretti et al. 2020	Environmental life cycle assessment of polypropylene made from used cooking oil	Cradle-to-factory gate		1 kg of polypropylene		Polypropylene	Netherlands	PEFCR draft guidance v.6.3, ILCD 2015	Climate change, Ozone depletion, Human toxicity, non-cancer effects, Human toxicity, cancer effects, Particulate matter, Ionizing radiation HH, Photochemical ozone formation, Acidification, Terrestrial eutrophication, Freshwater eutrophication, Marine eutrophication, Freshwater ecotoxicity, Land transformation, Water use, Resource use, minerals and metals, Resource use, fossil fuels	UCO-based PP: 0.63 kg CO2-eq/kg, UCO-based PP with biogenic carbon removal: -2.51 kg CO2-eq/kg	from Table 4
23	Kikuchi et al. 2017	Greenhouse gas emissions and socioeconomic effects of biomass-derived products based on structural path and life cycle analyses: A case study of polyethylene and polypropylene in Japan	Cradle-to-gate	Not mentioned directly in the text: Life cycle boundary for synthesizing PE and PP from fossil and biomass-derived raw materials	1 kg-resin/1 L-EtOH		Polyethylene (PE) and Polypropylene (PP)	Japan	IPCC 2007	Global warming potential (GWP)	Dome-Bio-mola route: 2.03 kg CO2-eq/kg PE; Dome-bio-wood route: 3.11 kg CO2-eq/kg PE	from Fig. 6
24	Nachtergaele et al. 2019	Environmental sustainability assessment of renewables-based propylene glycol at full industrial scale production	Cradle-to-gate		1 ton of PG		Propylene glycol (PG)	Ertvelde, Belgium	not mentioned	Acidification, Climate change, Freshwater ecotoxicity, Freshwater eutrophication, Human toxicity, cancer effects, Human toxicity, non-cancer effects, Ionizing radiation E (interim), Ionizing radiation HH, Marine eutrophication, Ozone depletion, Particulate matter, Photochemical ozone formation, Terrestrial eutrophication, CEENE abiotic renewable resources, CEENE fossil fuels, CEENE land and bioti…	Oleochemical PG: 40% reduction kg CO2-eq., Biodiesel PG: 60% reduction kg CO2-eq.
25	Gonzalez-Garay et al. 2017	High-Value Propylene Glycol from Low-Value Biodiesel Glycerol: A Techno-Economic and Environmental Assessment under Uncertainty	Cradle-to-gate		1 kg of propylene glycol (PG)	(not mentioned directly: environmental impacts are evaluated per kilogram of PG produced)	Propylene glycol (PG)	Not mentioned	CML 2001	Global warming potential (GWP), Ozone layer depletion, Photochemical oxidation, Marine aquatic ecotoxicity, Fresh aquatic ecotoxicity, Terrestrial ecotoxicity, Eutrophication potential, Human toxicity, Acidification potential, Depletion of abiotic resources	BAU: 4.8 kg CO2-eq./kg, GB-1: 1.85 kg CO2-eq./kg, GB-2: 1.85 kg CO2-eq./kg, GB-3: 8.8 kg CO2-eq./kg.	not mentioned in-text, extracted from Figure 6
26	Adom et al. 2014	Life-Cycle Fossil Energy Consumption and Greenhouse Gas Emissions of Bioderived Chemicals and Their Conventional Counterparts	Cradle-to-grave		Not mentioned		Propylene glycol (PG), 1,3-propanediol (1,3-PDO), 3-hydroxypropionic acid (3-HP), acrylic acid (AA), polyethylene (PE), succinic acid (SA), isobutanol, and 1,4-butanediol (1,4-BDO)	United States	not mentioned	Global warming potential (GWP) and fossil energy consumption (FEC)	1,3-Propanediol from algal glycerol: 2.7 kg CO2-eq/kg	from Table 2
27	Gong and You. 2015	Value-Added Chemicals from Microalgae: Greener, More Economical, or Both?	Cradle-to-gate		1 MJ of energy of biodiesel produced, Gasoline gallon equivalent (GGE) of biodiesel produced		Bioproducts (e.g., hydrogen, propylene glycol, Glycerol-tert-butyl ether, Poly-3-hydroxybutyrate) and biodiesel from microalgae	United States	IPCC method with characterization factors of a 100-year horizon (GWP 100a)	Global warming potential (GWP)	Hydrogen: 4.28 kg CO2-eq/kg H2, PG: 1.82 kg CO2-eq/kg PG, GE: 2.37 kg CO2-eq/kg GE, PHB: 4.10 kg CO2-eq/kg PHB, Biodiesel: 0.040 kg CO2-eq/MJ biodiesel
28	Sun et al. 2022	Hydrogenolysis of Glycerol to Propylene Glycol: Energy, Tech-Economic, and Environmental Studies	Cradle-to-gate	Not mentioned directly in the text: Differently, the entering materials for CTH process (Figure9B) are mainly glycerol and EtOH, the latter of which can be also derived from bio-substrates.	Not mentioned		Propylene glycol	Not mentioned	not mentioned	Global warming potential (GWP)	Catalytic transfer hydrogenolysis (CTH) route: 470 t CO2 eq/per million PG	from Figure 10
29	Liew et al. 2022	Carbon-negative production of acetone and isopropanol by gas fermentation at industrial pilot scale	Cradle-to-gate		Not mentioned		Acetone and Isopropanol (IPA)	Not mentioned	not mentioned	Global warming potential (GWP)	Acetone (traditional route): 2.55 kg CO2-eq/kg, IPA (traditional route): 1.85 kg CO2-eq/kg, Acetone (gas fermentation): -1.78 kg CO2-eq/kg, IPA (gas fermentation): -1.17 kg CO2-eq/kg
30	Bhagwat et al. 2021	Sustainable Production of Acrylic Acid via 3-Hydroxypropionic Acid from Lignocellulosic Biomass	Cradle-to-grave		1 kg of acrylic acid		Acrylic acid	Not mentioned	not mentioned	Global warming potential (GWP) and Fossil energy consumption (FEC)	Acrylic acid: 3.90 [3.42 - 4.63] kg CO2-eq/kg (GWP 100), Acrylic acid: 51.4 [43.1 - 62.1] MJ/kg (FEC)
31	Cespi et al. 2015	Glycerol as feedstock in the synthesis of chemicals: a life cycle analysis for acrolein production	Cradle-to-gate		1 kg of acrolein		Acrolein	Italy	ReCiPe 2008 (20-year time horizon)	Climate change, Fossil fuel depletion, Metal depletion, Agricultural land occupation, Terrestrial ecotoxicity	Baseline scenario: 3.90 kg CO2-eq/kg, Improved scenario: 3.00 kg CO2-eq/kg, Low-pH fermentation scenario: 2.30 kg CO2-eq/kg
32	Tripodi et al. 2018	Acetonitrile from Bioethanol Ammoxidation: Process Design from the Grass-Roots and Life Cycle Analysis	Cradle-to-gate		1 kg of biobased acetonitrile		Acetonitrile	Not mentioned	ReCiPe 2016	Climate change, Ozone depletion, Terrestrial acidification, Freshwater eutrophication, Marine eutrophication, Human toxicity, Photochemical oxidant formation, Particulate matter formation, Terrestrial ecotoxicity, Freshwater ecotoxicity, Marine ecotoxicity, Ionizing radiation, Agricultural land occupation, Urban land occupation, Natural land transformation, Water depletion, Metal depletion, Fossi…	Biobased acetonitrile, from corn EtOH: 1.4 kg CO2-eq, Fossil-based acetonitrile, from the SOHIO process: 3.8 kg CO2-eq	from Table 6
33	Ögmundarson et al. 2020	Environmental hotspots of lactic acid production systems	Cradle-to-grave		1 kg of lactic acid		Lactic acid	United States	ReCiPe 2016	Global warming potential (GWP), Stratospheric ozone depletion, Ionizing radiation, Ozone formation, Human toxicity, Fine particulate matter impacts, Tropospheric ozone formation, Acidification, Eutrophication, Ecotoxicity, Land-use, Resources depletion, Water consumption	Lactic acid from corn: 4.19 kg CO2-eq, Lactic acid from corn stover: 7.90 kg CO2-eq, Lactic acid from Laminaria sp.: 11.0 kg CO2-eq	from Table 5
34	Li et al. 2021	Sustainable Lactic Acid Production from Lignocellulosic Biomass	Gate-to-gate	Not mentioned directly in the text: Biorefinery fence line	1 kg of produced lactic acid (88% on weight basis, the L-form)		Lactic acid	United States	not mentioned	Global warming potential (GWP 100), Fossil energy consumption (FEC)	Baseline: 5.92 kg CO2-eq/kg, With 25% renewable natural gas and 25% biomass diversion: 2.79 kg CO2-eq/kg
35	Morales et al. 2015	Environmental and economic assessment of lactic acid production from glycerol using cascade bio- and chemocatalysis	Cradle-to-gate		1 kg of lactic acid (LA)		Lactic acid	Not mentioned	not mentioned	Non-renewable CED, Global warming potential	LA-1: 7.3 kg CO2-eq/kg LA, LA-2: 6.9 kg CO2-eq/kg LA, LA-3: 6.3 kg CO2-eq/kg LA, LA-4: 5.8 kg CO2-eq/kg LA, LA-5: 7.6 kg CO2-eq/kg LA	from Fig. S9
36	Munagala et al. 2021	Life cycle and economic assessment of sugarcane bagasse valorization to lactic acid	Cradle-to-gate		1 kg of lactic acid		Lactic acid	India	ReCiPe 2016	Climate change, Water depletion, Agricultural land occupation, Freshwater eutrophication, Ozone depletion, Particulate matter formation, Terrestrial acidification, Fossil Depletion, Photochemical oxidant formation	Base case (Scenario-1): 4.62 kg CO2-eq./kg, Scenario-4: 5.54 kg CO2-eq./kg, Optimistic scenario: 2.29 kg CO2-eq./kg
37	Daful et al. 2016	Environmental impact assessment of lignocellulosic lactic acid production: Integrated with existing sugar mills	Cradle-to-gate		1 tonne of LA at the factory gate		Lactic acid	South Africa	ReCiPe Midpoint(H)	Abiotic depletion potential, Acidification potential, Freshwater eutrophication potential, Marine eutrophication potential, Global warming potential (GWP), Ozone layer depletion potential, Human toxicity potential, Freshwater aquatic ecotoxicity potential, Marine aquatic ecotoxicity potential, Terrestrial ecotoxicity potential, Photochemical oxidant creation potential, Metal depletion potential, …	Biobased LA: 412.50 kg CO2-eq/tonne, Fossil-based LA: 4338.14 kg CO2-eq/tonne
38	Pachón et al. 2020	Conversion of vine shoots into bioethanol and chemicals: Prospective LCA of biorefinery concept	Cradle-to-gate	Not mentioned directly in the text: Studied system: from vine shoot utilization to chemical production, Reference system: vine shoots are burnt	1 kg lactic acid (VS LA), 1 kg lactic acid and 0.33 kg furfural (VS LF)		Lactic acid and Furfural	Vaud, Valais and Geneva, Switzerland	ReCipe	Climate change, fossil fuel depletion, freshwater ecotoxicity and eutrophication and human toxicity impacts	VS LA: 3.26 kg CO2-eq., RS VS LA: 4.67 kg CO2-eq., VS LF: 3.03 kg CO2-eq., RS VS LF: 4.77 kg CO2-eq.
39	Lee et al. 2021	Life cycle analysis of renewable natural gas and lactic acid production from waste feedstocks	Cradle-to-gate		1) per dry kg of waste treated, and 2) per MJ or kg of RNG and LA production		Renewable natural gas (RNG) and Lactic acid (LA)	United States	GWP 100 from IPCC	Global warming potential (GWP)	LA from sludge: -4.2 kg CO2-eq/kg LA, LA from food waste: -1.4 kg CO2-eq/kg LA, LA from swine manure: -4.2 kg CO2-eq/kg LA, LA from FOG: -1.4 kg CO2-eq/kg LA
40	Mandegari et al. 2017	Multi-criteria analysis of a biorefinery for co-production of lactic acid and ethanol from sugarcane lignocellulose	Cradle-to-gate		1 tonne LA produced, 1 MWh electricity produced		Lactic acid	South Africa	CML-IA baseline 3.02	Abiotic depletion, global warming potential (GWP100), acidifi cation, eutrophication, ozone depletion (ODP), and photochemical oxidation (POCP), terrestrial and aquatic eco-toxicity, and human toxicity	Bagasse-based LA biorefinery route: 3800 kg CO2-eq/ton LCA	from Table S7
41	Ding et al. 2023	Relay photo/thermal catalysis enables efficient cascade upgrading of sugars to lactic acid: Mechanism study and life cycle assessment	Cradle-to-gate		1 kg of lactic acid		Lactic acid	Not mentioned	TRACI	Global warming potential (GWP), Acidification potential, Eutrophication potential, Fossil fuels resource depletion, Ecotoxicity potential	Biobased-LA production: 2.97 kg CO2-eq/kg LA, Conventional LA: 4.30 kg CO2-eq/kg LA
42	Meghana et al. 2021	Valorization of sugarcane bagasse to lactic acid: Life cycle assessment and Techno-economic evaluation in Indian scenario	Cradle to gate		1 kg of lactic acid		Lactic acid	India	ReCiPe Midpoint (H)	Global warming potential (GWP), Water depletion, Agricultural land occupation	Bagasse-based LA process: 4.62 kg CO2-eq./kg
43	Lopes et al. 2019	Techno-economic and life-cycle assessments of small-scale biorefineries for isobutene and xylo-oligosaccharides production: a comparative study in Portugal and Chile	Cradle-to-gate		1 t of lignocellulosic feedstock		Isobutene and xylo-oligosaccharides (XOS)	Portugal and Chile	ReCiPe Midpoint (H)	Climate change (CC), Ozone depletion (OD), Terrestrial acidification (TA), Freshwater eutrophication (FE), Marine eutrophication (ME), Particulate matter formation (PMF), Agricultural land occupation (ALO), Water depletion (WD), Fossil depletion (FD)	Corn stover-based route: 2.72 kgCO2eq./kg isobutene, Wheat straw-based route: 2.19 kgCO2eq./kg isobutene
44	Fazeni-Fraisl and Lindorfer. 2022	Comparative life cycle assessment of first- and second-generation bio-isobutene as a drop-in substitute for fossil isobutene	Cradle-to-gate		1 kg of bio-based IBN		Isobutene	Unspecified EU country	CML 2016	Global warming potential (GWP), Eutrophication potential (EP), Acidification potential (AP), Freshwater aquatic ecotoxicity potential, Abiotic depletion potential, Photochemical ozone creation potential (POCP), Ozone depletion potential (ODP), Marine aquatic ecotoxicity potential (MAETP), Terrestrial ecotoxicity potential (TETP), Human toxicity potential (HTP)	Scenario 1: 1.693 kg CO2-eq/kg isobutene, Scenario 2: 1.727 kg CO2-eq/kg isobutene, Scenario 3: 2.114 kg CO2-eq/kg isobutene, Scenario 4: 0.948 kg CO2-eq/kg isobutene, Scenario 5: 0.954 kg CO2-eq/kg isobutene, Scenario 6: 1.696 kg CO2-eq/kg isobutene, Scenario 7: 4.586 kg CO2-eq/kg isobutene, Scenario 8: 0.145 kg CO2-eq/kg isobutene, Scenario 9: 1.342 kg CO2-eq/kg isobutene	from SI
45	Berger et al. 2022	The techno-economic feasibility and carbon footprint of recycling and electrolysing CO2 emissions into ethanol and syngas in an isobutene biorefinery	Gate-to-gate		1 kg of isobutene (IBN), 1 kg of ethanol (EtOH), 1 kg of syngas		Isobutene, Ethanol, Syngas	France	not mentioned	Global warming potential (GWP)	Bio-IBN: 0.293 kg CO2-eq/kg, EtOH: 0.350 kg CO2-eq/kg, Syngas: 0.193 kg CO2-eq/kg
46	Cabrera Camacho et al. 2020	Techno-economic and Life-Cycle Assessment of One-Step Production of 1,3-Butadiene from Bioethanol Using Reaction Data under Industrial Operating Conditions	Cradle-to-gate		1 tonne of produced 1,3-BD		1,3-Butadiene	The United States, Brazil, and Europe	ReCiPe2016 midpoint (H) V1.02	Global warming potential (GWP100), Water consumption (WC), Cumulative energy demand (CED)	B1BR: -73 kg CO2-eq/tonne 1, 3-BD, B2BR: -52 kg CO2-eq/tonne 1, 3-BD
47	Cabrera Camacho et al. 2022	Assessing the economic and environmental sustainability of bio-olefins: The case of 1,3-butadiene production from bioethanol	Cradle-to-gate		1 tonne of 1,3-butadiene (1,3-BD)		1,3-butadiene	Brazil	ReCiPe 2016	Global warming potential (GWP), Water consumption (WC), Cumulative energy demand (CED)	Naphtha-cracking: 2.5 kg CO2-eq/kg BD, One-step B1: -0.07 kg CO2-eq/kg BD, One-step B2: -0.05 kg CO2-eq/kg BD, Two-step B3: 1.29 kg CO2-eq/kg BD, Two-step B4: 2.31 kg CO2-eq/kg BD
48	Shylesh et al. 2016	From Sugars to Wheels: The Conversion of Ethanol to 1,3-Butadiene over Metal-Promoted Magnesia-Silicate Catalysts	Not mentioned		Not mentioned		1,3-Butadiene	USA and Brazil	not mentioned	Global warming potential (GWP)	Corn grain-based one-step route: 1.81 kg CO2-e/kg 1,3-BD, Sugar cane-based one-step route: -0.52 kg CO2-e/kg 1,3-BD, Corn stover-based one-step route: -0.65 kg CO2-e/kg 1,3-BD, Petroleum-based route: 1.77 kg CO2-e/kg 1,3-BD.	from Figure 11
49	Farzad et al. 2017	Integrated techno-economic and environmental analysis of butadiene production from biomass	Cradle-to-gate		1 tonne BD produced, 1 MWh electricity		Butadiene	South Africa	CML 2016, CED method	Abiotic depletion, global warming potential (GWP100), acidification, eutrophication, ozone depletion (ODP) and photochemical oxidation (POCP), terrestrial and aquatic eco-toxicity, and human toxicity.	Bio-based BD (self-energy sufficient): 72 kg CO2-eq/t BD, BD from Naphtha: 582 kg CO2-eq/t BD
50	Cespi et al. 2016	Butadiene from biomass, a life cycle perspective to address sustainability in the chemical industry	Cradle-to-gate		1 ton of BD		1,3-butadiene	EU, Brazil, US	ReCiPe	Global warming potential (GWP), Water depletion, Cumulative Energy Demand (CED), Particulate matter formation, Agricultural land occupation, Terrestrial ecotoxicity	Mixture biomass-based Lebedev (one-step) route (EU): 2.04 t CO2-eq/t, Mixture biomass-based Ostromisslensky (two-step) route (EU): 3.65 t CO2-eq/t, Sugarcane-based Lebedev (one-step) route (BR): 1.03 t CO2-eq/t, Sugarcane-based Ostromisslensky (two-step) route (BR): 2.2 t CO2-eq/t, Corn-based Lebedev (one-step) route (US): 2.32 t CO2-eq/t, Corn-based Ostromisslensky (two-step) route (US): 4.05 t …	from Fig. 8
51	Rodgers et al. 2022	Renewable butadiene: A case for hybrid processing via bio- and chemo-catalysis	Cradle-to-gate		1 kg for butadiene, 1 kg/kWh for the respective co-products		Butadiene	China	not mentioned	Global warming potential (GWP)	Acet-BD: -3.23 kg CO2-eq/kg butadiene, Eth-BD: -2.80 kg CO2-eq/kg butadiene, Syn-BD: -1.60 kg CO2-eq/kg butadiene
52	Sadhukhan et al. 2019	Novel macroalgae (seaweed) biorefinery systems for integrated chemical, protein, salt, nutrient and mineral extractions and environmental protection by green synthesis and life cycle sustainability assessments	Cradle-to-gate	Not mentioned directly in the text: summarized from table 2	1 kg dry macroalgae	Not mentioned directly in the text: The data are generated for cultivated 1 kg dry brown macroalgae.	Integrated biorefinery products (protein, sugar, inorganic platforms), levulinic acid, FDCA, succinic acid, lactic acid	Switzerland, Great Britain, Global	CML 2016	Abiotic and fossil fuel depletion potentials, and nine primary to mid chain emission impact potentials, i.e. global warming, ozone layer depletion, human toxicity, freshwater aquatic ecotoxicity, marine aquatic ecotoxicity, terrestrial ecotoxicity, photochemical oxidation, acidification and eutrophication potentials	Levulinic acid: 0.34 kg CO2-eq/kg dry macroalgae, FDCA: 0.15 kg CO2-eq/kg dry macroalgae, Succinic acid: 0.45 kg CO2-eq/kg dry macroalgae, Lactic acid: 0.18 kg CO2-eq/kg dry macroalgae or 3.75, 0.34, 0.86 and 0.27 kg CO2 equivalent per kg of the chemical product, respectively
53	Isoni et al. 2018	Biomass to levulinic acid: A techno-economic analysis and sustainability of biorefinery processes in Southeast Asia	Cradle-to-gate	Not mentioned directly in the text: From agriculture land to the final conversion of biomass to chemicals, Different feedstock choices including cultivation and land use, Logistics and storage, Energy demands, CO2-eq emissions, Plant capacity (20 ktonne/year), Costs	1 kg of levulinic acid		Levulinic acid	Southeast Asia	not mentioned	Energy consumption, Global warming potential (GWP)	Thailand Case-Scenario 1: 3.34 kg CO2 eq/kg, Thailand Case-Scenario 2: 3.3 kg CO2 eq/kg, Malaysia case - Scenario 1: 1.73 kg CO2 eq/kg, Malaysia case - Scenario 2: 1.76 kg CO2 eq/kg, Indonesia case - Scenario 1: 1.96 kg CO2 eq/kg, Indonesia case - Scenario 2: 1.94 kg CO2 eq/kg	from Fig. 6
54	Hafyan et al. 2020	Sustainability assessment of levulinic acid and succinic acid production from empty fruit bunch	Gate-to-gate		1 kg output chemical obtained through each process		Levulinic acid and Succinic acid	Malaysia	not mentioned	Global warming potential (GWP)	Levulinic acid: 6.3 kg CO2-eq/kg, Succinic acid: 11.2 kg CO2-eq/kg
55	Thompson et al. 2021	Comparison of pyrolysis and hydrolysis processes for furfural production from sugar beet pulp: A case study in southern Idaho, USA	Gate-to-gate		1 metric ton of furfural		Furfural	Southern Idaho, USA	CMLIA baseline method	Global warming potential (GWP)	Pyrolysis: 267 kg CO2-eq./metric ton, Hydrolysis: 1095 kg CO2-eq./metric ton
56	Luo et al. 2021	Comparative Study of Different Hybrid Life Cycle Assessment Methodologies Applied to Biomass-based Chemical Production	Cradle-to-gate		1 kg of p-Xylene or PSA produced		p-Xylene and Pressure-Sensitive Adhesive (PSA)	Not mentioned	TRACI 2.1	Global warming potential (GWP), ozone depletion, acidification, eutrophication, respiratory effects, smog, human carcinogenics and non carcinogenics effects	CA hydrolysis-based route: 4.4 kg CO2 eq/kg p-xylene, MSH hydrolysis-based route: 3.73 kg CO2 eq/kg p-xylene, MSH hydrolysis-based route (no grid): 4.29 kg CO2 eq/kg p-xylene, CA hydrolysis-based route: 4.379 kg CO2 eq/kg p-xylene, MSH hydrolysis-based route: 3.677 kg CO2 eq/kg p-xylene, MSH hydrolysis-based route (no grid): 4.219 kg CO2 eq/kg p-xylene	from Figure 3
57	Athaley et al. 2019	Techno-economic and life cycle analysis of different types of hydrolysis process for the production of p-Xylene	Cradle-to-gate		1 metric ton of p-Xylene		p-Xylene	USA	ReCipe 2008	Climate change, water depletion, land occupation, ecotoxicity, and fossil depletion	DA hydrolysis pathway: 16.5 kg CO2-eq/kg p-Xylene, CA hydrolysis pathway: 3.8 kg CO2-eq/kg p-Xylene, MSH hydrolysis pathway: 4.2 kg CO2-eq/kg p-Xylene	from Fig 4.
58	Lin et al. 2015	Life Cycle Assessment of Biobased p-Xylene Production	Cradle-to-gate	cradle to plant gate	1 metric ton of pX		p-Xylene	United States	ReCiPe v1.0, CML, Eco-indicator	Ozone depletion, human toxicity and ecotoxicity, ionizing radiation, photochemical oxidant formation, particulate matter formation, climate change, terrestrial ecotoxicity, terrestrial acidification, agricultural land occupation, urban land occupation, natural land transformation, marine ecotoxicity, marine eutrophication, fresh water eutrophication, fresh water ecotoxicity, fossil fuel depletion…	Starch-based pX: 8540 kg CO2 eq/t, Oak-based pX: 1660 kg CO2 eq/t	from Table 7
59	Rosental et al. 2020	Life Cycle Assessment of Carbon Capture and Utilization for the Production of Large Volume Organic Chemicals	Cradle-to-gate		One metric ton (1,000kg) of one of the desired products, respectively: methanol, ethylene, propylene, benzene, toluene, mixed xylenes		Methanol, Ethylene, Propylene, Benzene, Toluene, Mixed Xylenes	Germany	IPCC 2013, CML, WMO, SAEFL	Global Warming Impact (GWI), Cumulated Energy Demand (CED), Acidification Potential (AP), Eutrophication Potential (EP), Ozone Depletion Potential (ODP), Particulate Matter Formation (PM 2.5)	Methanol: 627 kg CO2-eq/t, Olefins: 1448 kg CO2-eq/t, Benezene: 1868 kg CO2-eq/t, Toluene: 1225 kg CO2-eq/t, Xylene: 796 kg CO2-eq/t, BTX: 1296 kg CO2-eq/t	from Table 4
60	Zheng et al. 2018	Life-cycle assessment and techno-economic analysis of the utilization of bio-oil components for the production of three chemicals	Cradle-to-gate		1 kg of BO-LG, BO-resin, or BO-deicer		BO-LG, BO-resin, BO-deicer	Not mentioned	not mentioned	Global warming potential (GWP100a), Cumulative energy demand (CED), Eco-indicator 99 (EI-99)	BO-LG: 2.19 kg CO2-eq/kg, BO-resin: 0.934 kg CO2-eq/kg, BO-deicer: 22.3 kg CO2-eq/kg
61	Perederic et al. 2020	Life Cycle Analysis of Phenol - Formaldehyde Resins Substituted with Lignin	Gate-to-Gate and Cradle-to-Gate		1 kg of resin		Resin (PF, LPF, LF)	Not mentioned	not mentioned	Global warming potential (GWP), Ozone depletion potential (ODP), Photochemical oxidation potential (PCOP), Acidification potential (AP), Human toxicity potential by ingestion (HTPI), Human toxicity by exposure (HTPE), Aquatic toxicity potential (ATP), Human toxicity carcinogenic (HTC), Human toxicity non-carcinogenic (HTNC), Fresh water ecotoxicity (ET), Non-renewable resources, Photochemical ozo…	PF resin: 3.13 kg CO2-eq, LPF resin: 2.69 kg CO2-eq, LF resin: 2.18 kg CO2-eq
62	Patel et al. 2022	Technoeconomic and Life-Cycle Assessment for Electrocatalytic Production of Furandicarboxylic Acid	Cradle to gate		100 tonne/day of FDCA at the factory gate		FDCA	Quebec, Canada	ReCiPe 1.1	Climate change (CC), Agricultural land occupation (ALO), Fossil depletion (FD), Freshwater eutrophication (FE), Freshwater ecotoxicity (FET), Human toxicity (HT), Marine ecotoxicity (MET), Ozone depletion (OD), Photochemical oxidant formation (POF), Terrestrial acidification (TA), Urban land occupation (ULO), Water depletion (WD)	Electrochemical route: 2801081.91 kg CO2-eq/FU, Thermochemical route: 1179685.03 kg CO2-eq/FU	from Table S4
63	Kim et al. 2020	Sustainable Production of Bioplastics from Lignocellulosic Biomass: Technoeconomic Analysis and Life-Cycle Assessment	Cradle-to-gate		1.0 kg of FDCA and 1.0 kg of TPA		FDCA and TPA	Worldwide	ReCiPe 1.13	(1) Climate change (CC), (2) Fossil depletion (FD), (3) metal depletion, (4) water depletion,(5) freshwater ecotoxicity, (6) terrestrial ecotoxicity, (7) human toxicity, (8) freshwater eutrophication, (9) terrestrial acidification, and (10) ozone depletion	FDCA: 2.525097 kg CO2-eq/FU, TPA: 1.7996478 kg CO2-eq/FU	from Table S6
64	Kim et al. 2022	Integrative technical, economic, and environmental sustainability analysis for the development process of biomass-derived 2,5-furandicarboxylic acid	Cradle to gate		1.0 kg of FDCA at the factory gate		FDCA	Not mentioned	ReCiPe 1.13 Hierarchist mid-point	Climate change (CC) and Fossil depletion (FD)	Total CC: 2.8 kg CO2-eq., HMF production subsystem: 2.4 kg CO2-eq., FDCA production subsystem: 0.24 kg CO2-eq., Biomass fractionation subsystem: 0.16 kg CO2-eq.
65	Isola et al. 2017	Life cycle assessment of photodegradable polymeric material derived from renewable bioresources	Cradle-to-gate		1 g of photodegradable polymer		Photodegradable polymer	South Dakota, United States	ReCiPe	Climate change, ozone depletion, terrestrial acidification, freshwater eutrophication, marine eutrophication, human toxicity, photochemical oxidant formation, particular matter formation, terrestrial ecotoxicity, marine ecotoxicity, freshwater ecotoxicity, ionizing radiation, agricultural land occupation, urban land occupation, natural land transformation, water depletion, metal depletion and fos…	Stage I: 0.019 kg CO2-eq., Stage II: 4.522 kg CO2-eq., Stage III: 4.624 kg CO2-eq., Stage IV: 5.562 kg CO2-eq., Stage V: 26.030 kg CO2-eq., Stage VI: 12.267 kg CO2-eq., Total: 53.019 kg CO2-eq.

## Sheet: LCA (LLM-generation)
ID	Author, Year	Title	System boundary	Functional unit	Reference product	Impact assessment method	Impact category	LCIA results	Geography
1	Liu et al. 2020	Comprehensive analysis of environmental impacts and energy consumption of biomass-to-methanol and coal-to-methanol via life cycle assessment	Cradle-to-grave	79 t of methanol	Methanol	CML2001	Global warming potential (GWP), Acidification potential (AP), Human toxicity potential (HTP)	CTM process: 274, 428 kg CO2-eq, BTM process: Negative GHG emissions	Not mentioned
2	Reno et al. 2011	A LCA (life cycle assessment) of the methanol production from sugarcane bagasse	Cradle-to-gate	1 kg of produced methanol	Methanol	CML 2001	Abiotic depletion, Acidification, Eutrophication, Global warming potential, Ozone layer depletion, Human toxicity, Fresh water aquatic ecotoxicity, Marine aquatic ecotoxicity, Terrestrial ecotoxicity, Land competition, Photochemical oxidation	Methanol: 2.284 kg CO2-eq.	Brazil
3	Zhu et al. 2022	LCA comparison analysis for two types of H2 carriers: Methanol and ammonia	Cradle-to-grave	1 kg and 1 MJ of H2 carrier produced from coal, natural gas, and renewables	Methanol and Ammonia	CML 2001	Global warming potential (GWP), Acidification potential, Ozone depletion potential, Photochemical ozone creation potential, Eutrophication potential, Abiotic depletion potential	Coal-CH3OH: 3.09 kg CO2-eq/kg, NG-CH3OH: 0.84 kg CO2-eq/kg, PV/CCU-CH3OH: 1.04 kg CO2-eq/kg, Coal-NH3: 3.93 kg CO2-eq/kg, NG-NH3: 2.70 kg CO2-eq/kg, PV-NH3: 0.78 kg CO2-eq/kg	China
4	Galusnyak et al. 2021	Life Cycle Assessment of Bio-methanol Derived from Various Raw-materials	Cradle-to-gate	1 ton of bio-methanol	Bio-methanol	ReCIPe	Global warming potential (GWP), Freshwater eutrophication potential (FEP), Ozone depletion potential (ODP), Fossil depletion potential (FDP), Freshwater ecotoxicity potential (FETP), Human toxicity potential (HTP), Metal depletion potential (MDP), Photochemical oxidant formation potential (POFP), Terrestrial ecotoxicity potential (TETP)	Case 1: 1, 117.23 kg CO2-eq./t MeOH, Case 2: 6, 253.08 kg CO2-eq./t MeOH, Case 3: 1, 383.42 kg CO2-eq./t MeOH, Case 4: 435.13 kg CO2-eq./t MeOH, Case 5: 522.57 kg CO2-eq./t MeOH, Case 6: 848.77 kg CO2-eq./t MeOH, Case 7: 392.71 kg CO2-eq./t MeOH, Case 8: 1, 311.25 kg CO2-eq./t MeOH	Not mentioned
5	Galusnyak et al. 2023	From Secondary Biomass to Bio-Methanol through CONVERGE Technology: An Environmental Analysis	Cradle-to-gate	1 ton of bio-methanol	Bio-methanol	ReCiPe	Climate change/Global Warming Potential (GWP), Freshwater Eutrophication Potential (FEP), Ozone Depletion Potential (ODP), Fossil fuel Depletion Potential (FDP), Freshwater Ecotoxicity Potential (FETP), Human Toxicity Potential (HTP), Mineral Depletion Potential (MDP), Photochemical Oxidant Formation Potential (POFP), Terrestrial Ecotoxicity Potential (TETP)	Case 1: 1436.19 kg CO2-eq./t MeOH, Case 2: 1288.04 kg CO2-eq./t MeOH, Case 3: 2511.22 kg CO2-eq./t MeOH, Case 1 (Nuclear Power): 1403.52 kg CO2-eq./t MeOH, Case 2 (Nuclear Power): 1261.66 kg CO2-eq./t MeOH, Case 1 (Hydro Power): 1413.53 kg CO2-eq./t MeOH, Case 2 (Hydro Power): 1269.74 kg CO2-eq./t MeOH	Northern Sweden and Italy
6	Fózer et al. 2021	Sustainability assessment of biomethanol production via hydrothermal gasification supported by artificial neural network	Cradle-to-gate	1 t of produced biomethanol	Biomethanol	IMPACT2002 v2.14	Global warming potential (GWP), Carcinogens, Non-carcinogens, Respiratory inorganics, Ionizing radiation, Ozone layer depletion, Respiratory organics, Aquatic ecotoxicity, Terrestrial ecotoxicity, Terrestrial acid/nutri, Land occupation, Aquatic acidification, Aquatic eutrophication, Non-renewable energy, Mineral extraction	In-situ HTG H2 boosting: -439 kg CO2-eq/t CH3OH, Increased external H2 usage: -725 kg CO2-eq/t CH3OH	Not mentioned
7	Khoo et al. 2016	Bio-chemicals from lignocellulose feedstock: sustainability, LCA and the green conundrum	Cradle-to-gate	1 kg bio-chemical	Bio-methanol, Bio-formic acid, Bio-acetone	Not mentioned	Global warming potential (GWP), Acidification, Eutrophication, Human toxicity, Photochemical Ozone Creation Potential (POCP)	Bio-methanol from bagasse: ~0.3 kg CO2-eq/kg, Bio-methanol from rice straw: ~0.77 kg CO2-eq/kg, WS-Acetone: ~5.87 kg CO2-eq/kg	Not mentioned
8	Choe et al. 2022	Techno-economic and environmental assessments for sustainable bio-methanol production as landfill gas valorization	Not mentioned	1 kg of MeOH	Methanol (MeOH)	Not mentioned	Global warming potential (GWP)	Case 1: 2.36 kg CO2-eq/kg MeOH, Case 2: 0.835 kg CO2-eq/kg MeOH, Case 3: 0.605 kg CO2-eq/kg MeOH	Korea
9	Budsberg et al. 2020	Production routes to bio-acetic acid: life cycle assessment	Cradle-to-biorefinery exit gate	1 tonne of acetic acid	Acetic acid	Not mentioned	Global warming potential (GWP), Fossil fuel use (FFU)	EAX OC: 1000 kg CO2-eq./t, EAX LE: 2500 kg CO2-eq./t, ADX OC: -370 kg CO2-eq./t, ADX LE: 180 kg CO2-eq./t	United States
10	Gadkari et al. 2021	Microbial electrosynthesis: is it sustainable for bioproduction of acetic acid?	Cradle-to-gate	1000 t per year of AA produced	Acetic acid (AA)	IPCC 2013 GWP 100a	Global warming potential (GWP), Non-renewable energy use (NREU)	Scenario 1 (continuous mode) MES with 3D-GFCF: 11.80 kg CO2-eq. per kg AA, Scenario 2 (continuous mode) MES with 3D-GFCF: 1.31 kg CO2-eq. per kg AA, Scenario 3 (fed-batch mode) MES with 3D-GFCF: 12.30 kg CO2-eq. per kg AA, Scenario 4 (fed-batch mode) MES with 3D-GFCF: 1.81 kg CO2-eq. per kg AA, Fossil-based system Celanese process: 1.31 kg CO2-eq. per kg AA	UK
11	Akmalina and Pawitra. (2020)	Life cycle assessment of ethylene production from empty fruit bunch	Cradle-to-gate	1 kg of ethylene	Bioethylene	CML-impact assessment baseline methodology	Global warming potential (GWP), Ozone depletion potential, Photochemical oxidant creation potential, Acidification potential, Eutrophication potential	Bioethylene: 1.15 kg CO2-eq/kg	Indonesia
12	Yang et al. (2018)	Manufacturing Ethylene from Wet Shale Gas and Biomass: Comparative Technoeconomic Analysis and Environmental Life Cycle Assessment	Cradle-to-gate	1 kg of ethylene manufactured at the plant gate	Ethylene	Not mentioned	Global warming potential (GWP)	Shale-gas-based pathway: 1.4 kg CO2-eq/kg ethylene, Corn-stover-based pathway: -1.0 kg CO2-eq/kg ethylene	Not mentioned
13	Ghanta et al. (2014)	Environmental impacts of ethylene production from diverse feedstocks and energy sources	Cradle-to-gate	Not mentioned	Ethylene	TRACI	Acidification, Greenhouse gas emissions, Ecotoxicity, Human health cancer, Human health non-cancer, Eutrophication, Ozone depletion potential, Smog formation potential	Naphtha: 198 kg CO2-eq., Ethane: 167 kg CO2-eq., Ethanol: 268 kg CO2-eq.	USA
14	Liptow et al. (2015)	Life cycle assessment of biomass-based ethylene production in Sweden — is gasification or fermentation the environmentally preferable route?	Cradle-to-gate	50,000 t ethylene at the gate of the ethylene production plant	Ethylene	Not mentioned	Global warming potential (GWP), Acidification (ACP), Eutrophication (EP), Photochemical ozone creation (POCP)	GROT scenario: Not mentioned, Mixed wood scenario: Not mentioned	Sweden
15	Khoo et al. (2020)	LCA of electrochemical reduction of CO2 to ethylene	Cradle-to-gate	1 g C2H4 for small-scale and 1 ton C2H4 for large-scale	Ethylene	CML 2001	Global warming potential (GWP), Acidification potential (AP), Eutrophication potential (EP), Human toxicity potential (HTP), Photochemical ozone creation potential (POCP)	Small-scale S-1: 3.6 g CO2-eq, Small-scale S-2: -3.70 g CO2-eq, Small-scale S-3: -0.98 g CO2-eq, Large-scale L-2: 3.0 t CO2-eq, Large-scale L-3: 0.651 t CO2-eq	Singapore
16	Alonso-Fariñas et al. 2018	Environmental assessment of thermo-chemical processes for bio-ethylene production in comparison with bio-chemical and fossil-based ethylene	Cradle-to-gate	1 tonne of ethylene	Bio-ethylene	CML 2	Abiotic depletion potential of elements (ADP elements), Abiotic depletion potential of fossil fuel resources (ADP fossil), Global warming potential (GWP), Ozone depletion potential (ODP), Human toxicity potential (HTP), Freshwater aquatic ecotoxicity potential (FAETP), Marine aquatic ecotoxicity potential (MAETP), Terrestrial ecotoxicity potential (TETP), Photochemical oxidants creation potential…	Case 3: -0.07 t CO2-eq./kg (GWP)	Duero Valley (Castilla y Leon, Spain)
17	Hong et al. 2014	Life cycle assessment of corn- and cassava-based ethylene production	Cradle-to-gate	1 tonne of ethylene production	Ethylene	IMPACT2002+ and ReCiPe	Global warming potential (GWP), Respiratory inorganics, Land occupation, Non-renewable energy, Ozone layer depletion, Aquatic acidification, Aquatic eutrophication, Terrestrial acidification/nutrification, Human health, Ecosystem quality, Climate change, Resources depletion	Cassava-based scenario: 4.3 to 7.4 t CO2-eq, Corn-based scenario: 2.7 to 4.1 t CO2-eq	China
18	Oliveira et al. 2019	Bio-ethylene from sugarcane as a competitiveness strategy for the Brazilian chemical industry	Cradle-to-gate	Not mentioned	Ethylene	Not mentioned	Global warming potential (GWP)	Ethanol-to-ethylene with BECCS: US$75/t CO2, Ethanol-to-ethylene without BECCS: US$82/t CO2, Bio-methanol-to-ethylene: US$106/t CO2	Brazil
19	Xu et al. 2021	Comparative Life Cycle Assessment of Energy Consumption, Pollutant Emission, and Cost Analysis of Coal/Oil/Biomass to Ethylene Glycol	Cradle-to-gate	1 ton of ethylene glycol	Ethylene glycol	Not mentioned	Global warming potential (GWP), Acidification potential (AP), Photochemical ozone creation potential (POCP), Nutrient enrichment (NE), Soot and ashes (SA)	CtEG: 7538 kg CO2-eq/t-EG, BtEG: -3489 kg CO2-eq/t-EG	China
20	Zhao et al. 2021	Advancing development of biochemicals through the comprehensive evaluation of bio-ethylene glycol	Not mentioned	1 metric ton of EG	Ethylene glycol (EG)	Not mentioned	Global warming potential (GWP)	Bio-EG: 0.8 t CO2-eq, Petro-EG: Not mentioned, Coal-EG: Not mentioned	China
21	Tähkämö et al. 2022	Life cycle assessment of renewable liquid hydrocarbons, propylene, and polypropylene derived from bio-based waste and residues: Evaluation of climate change impacts and abiotic resource depletion potential	Cradle-to-grave	1 kg of each studied intermediate product, i.e. RenLHCs, RenP, and RenPP	Renewable liquid hydrocarbons (RenLHCs), Renewable propylene (RenP), Renewable polypropylene (RenPP)	CML 2001 â€“ Aug 2016	Global warming potential (GWP), Abiotic depletion potential (fossil fuels)	RenLHCs: 0.45 kg CO2-eq., RenPP: 0.9 kg CO2-eq.	Global
22	Moretti et al. 2020	Environmental life cycle assessment of polypropylene made from used cooking oil	Cradle-to-factory gate	1 kg of polypropylene	Polypropylene	PEFCR draft guidance v.6.3	Climate change, Ozone depletion, Human toxicity, non-cancer effects, Human toxicity, cancer effects, Particulate matter, Ionizing radiation HH, Photochemical ozone formation, Acidification, Terrestrial eutrophication, Freshwater eutrophication, Marine eutrophication, Freshwater ecotoxicity, Land transformation, Water use, Resource use, minerals and metals, Resource use, fossil fuels	UCO-based PP: 0.63 kg CO2-eq/kg, UCO-based PP with biogenic carbon removal: -2.51 kg CO2-eq/kg	Netherlands
23	Kikuchi et al. 2017	Greenhouse gas emissions and socioeconomic effects of biomass-derived products based on structural path and life cycle analyses: A case study of polyethylene and polypropylene in Japan	Not mentioned	1 kg-resin	Polyethylene (PE) and Polypropylene (PP)	4th IPCC reports	Global warming potential (GWP)	PE production: Not mentioned, PP production: Not mentioned	Japan
24	Nachtergaele et al. 2019	Environmental sustainability assessment of renewables-based propylene glycol at full industrial scale production	Cradle-to-gate	1 ton of PG	Propylene glycol (PG)	Not mentioned	Acidification, Climate change â€“ IPCC GWP, Freshwater ecotoxicity, Freshwater eutrophication, Human toxicity, cancer effects, Human toxicity, noncancer effects, Ionizing radiation E (interim), Ionizing radiation HH, Marine eutrophication, Ozone depletion, Particulate matter, Photochemical ozone formation, Terrestrial eutrophication, CEENE abiotic renewable resources, CEENE fossil fuels, CEENE la…	Oleochemical PG: 40% reduction kg CO2-eq., Biodiesel PG: 60% reduction kg CO2-eq.	Ertvelde, Belgium
25	Gonzalez-Garay et al. 2017	High-Value Propylene Glycol from Low-Value Biodiesel Glycerol: A Techno-Economic and Environmental Assessment under Uncertainty	Cradle-to-gate	1 kg of propylene glycol (PG)	Propylene glycol (PG)	CML 2001	Global warming potential (GWP), Ozone layer depletion, Photochemical oxidation, Marine aquatic ecotoxicity, Fresh aquatic ecotoxicity, Terrestrial ecotoxicity, Eutrophication potential, Human toxicity, Acidification potential, Depletion of abiotic resources	BAU: 8 kg CO2-eq/kg of PG, GB-1: 4.5 kg CO2-eq/kg of PG, GB-2: 1.85 kg CO2-eq/kg of PG	United States
26	Gong and You. 2015	Value-Added Chemicals from Microalgae: Greener, More Economical, or Both?	Cradle-to-gate	1 kg of bioproduct manufactured	Bioproducts and biodiesel from microalgae	IPCC method with characterization factors of a 100-year horizon (GWP 100a)	Global warming potential (GWP)	Hydrogen: 4.28 kg CO2-eq/kg H2, PG: 1.82 kg CO2-eq/kg PG, GE: 2.37 kg CO2-eq/kg GE, PHB: 4.10 kg CO2-eq/kg PHB, Biodiesel: 0.040 kg CO2-eq/MJ biodiesel	United States
27	Sun et al. 2022	Hydrogenolysis of Glycerol to Propylene Glycol: Energy, Tech-Economic, and Environmental Studies	Not mentioned	Production of propylene glycol	Propylene glycol	Not mentioned	Global warming potential (GWP)	CTH process: 71% reduction in CO2 emission compared to CHDO	Not mentioned
28	Liew et al. 2022	Carbon-negative production of acetone and isopropanol by gas fermentation at industrial pilot scale	Cradle-to-gate	Not mentioned	Acetone and Isopropanol (IPA)	Not mentioned	Global warming potential (GWP)	Acetone (traditional route): 2.55 kg CO2-eq/kg, IPA (traditional route): 1.85 kg CO2-eq/kg, Acetone (gas fermentation): -1.78 kg CO2-eq/kg, IPA (gas fermentation): -1.17 kg CO2-eq/kg	Not mentioned
29	Adom et al. 2014	Life-Cycle Fossil Energy Consumption and Greenhouse Gas Emissions of Bioderived Chemicals and Their Conventional Counterparts	Cradle-to-grave	Not mentioned	Bioproducts (e.g., propylene glycol, 1,3-propanediol, 3-hydroxypropionic acid, acrylic acid, polyethylene, succinic acid, isobutanol, 1,4-butanediol)	GREET model	Global warming potential (GWP)	1, 3-PDO from glycerol: 39% reduction in GHG emissions, 1, 3-PDO from 3-HP: 39% reduction in GHG emissions, Acrylic acid (AA) from 3-HP: 53% reduction in GHG emissions, Succinic acid (SA): 86% reduction in GHG emissions, 1, 4-BDO from succinic acid: 52% reduction in GHG emissions	U.S.
30	Bhagwat et al. 2021	Sustainable Production of Acrylic Acid via 3-Hydroxypropionic Acid from Lignocellulosic Biomass	Cradle-to-grave	1 kg of acrylic acid	Acrylic acid	Not mentioned	Global warming potential (GWP)	Baseline scenario: 3.90 kg CO2-eq/kg, Improved scenario: 3.00 kg CO2-eq/kg, Low-pH fermentation scenario: 2.30 kg CO2-eq/kg	Not mentioned
31	Cespi et al. 2015	Glycerol as feedstock in the synthesis of chemicals: a life cycle analysis for acrolein production	Cradle-to-gate	1 kg of acrolein	Acrolein	ReCiPe 2008 and IPCC 2007	Climate change, Fossil fuel depletion, Metal depletion, Agricultural land occupation, Terrestrial ecotoxicity	Scenario A: 45.2 kg CO2-eq., Scenario B: 49.7 kg CO2-eq.	Italy
32	Tripodi et al. 2018	Acetonitrile from Bioethanol Ammoxidation: Process Design from the Grass-Roots and Life Cycle Analysis	Cradle-to-gate	1 kg of biobased acetonitrile	Biobased acetonitrile	ReCiPe 2016	Climate change, Ozone depletion, Terrestrial acidification, Freshwater eutrophication, Marine eutrophication, Human toxicity, Photochemical oxidant formation, Particulate matter formation, Terrestrial ecotoxicity, Freshwater ecotoxicity, Marine ecotoxicity, Ionizing radiation, Agricultural land occupation, Urban land occupation, Natural land transformation, Water depletion, Metal depletion, Fossi…	Biobased acetonitrile, from corn EtOH: 1.4 kg CO2-eq, Fossil-based acetonitrile, from the SOHIO process: 3.8 kg CO2-eq	Not mentioned
33	Ögmundarson et al. 2020	Environmental hotspots of lactic acid production systems	Cradle-to-grave	Utilization of 1 kg of LA, with 99.9% purity, for household product packaging application in the United States	Lactic acid	ReCiPe 2016	Global warming potential (GWP), Stratospheric ozone depletion, Ionizing radiation, Ozone formation, Human toxicity, Fine particulate matter impacts, Tropospheric ozone formation, Acidification, Eutrophication, Ecotoxicity, Land-use, Resources depletion, Water consumption	Lactic acid from corn: 4.19 kg CO2-eq., Lactic acid from corn stover: 7.90 kg CO2-eq., Lactic acid from Laminaria sp.: 11.0 kg CO2-eq.	United States
34	Li et al. 2021	Sustainable Lactic Acid Production from Lignocellulosic Biomass	Biorefinery fence line	1 kg of produced lactic acid (88% on weight basis, the L-form)	Lactic acid	Not mentioned	Global warming potential (GWP 100), Fossil energy consumption (FEC)	Baseline: 5.92 kg CO2-eq/kg, With 25% renewable natural gas and 25% biomass diversion: 2.79 kg CO2-eq/kg	United States
35	Morales et al. 2015	Environmental and economic assessment of lactic acid production from glycerol using cascade bio- and chemocatalysis	Cradle-to-gate	1 kg of lactic acid (LA)	Lactic acid (LA)	Not mentioned	Global warming potential (GWP-100a), Cumulative energy demand (CED), Eco-indicator 99 (EI99)	Not mentioned	Not mentioned
36	Munagala et al. 2021	Life cycle and economic assessment of sugarcane bagasse valorization to lactic acid	Cradle-to-gate	1 kg of lactic acid	Lactic acid	ReCiPe 2016	Climate change, Water depletion, Agricultural land occupation, Freshwater eutrophication, Ozone depletion, Particulate matter formation, Terrestrial acidification, Fossil depletion	Base case (Scenario-1): 4.62 kg CO2-eq./kg, Scenario-4: 5.54 kg CO2-eq./kg, Optimistic scenario: 2.29 kg CO2-eq./kg	India
37	Daful et al. 2016	Environmental impact assessment of lignocellulosic lactic acid production: Integrated with existing sugar mills	Cradle-to-gate	1 tonne of LA at the factory gate	Lactic acid (LA)	ReCiPe Midpoint(H)	Abiotic depletion potential, Acidification potential, Freshwater eutrophication potential, Marine eutrophication potential, Global warming potential (GWP), Ozone layer depletion potential, Human toxicity potential, Freshwater aquatic ecotoxicity potential, Marine aquatic ecotoxicity potential, Terrestrial ecotoxicity potential, Photochemical oxidant creation potential, Metal depletion potential, …	Biobased LA: 412.50 kg CO2-eq./tonne, Fossil based LA: 4338.14 kg CO2-eq./tonne	South Africa
38	Pachón et al. 2020	Conversion of vine shoots into bioethanol and chemicals: Prospective LCA of biorefinery concept	Not mentioned	1 kg lactic acid (VS LA), 1 kg lactic acid and 0.33 kg furfural (VS LF)	Lactic acid and Furfural	ReCiPe	Climate change, Fossil depletion, Human toxicity, Freshwater eutrophication, Freshwater ecotoxicity	VS LA: 3.26 kg CO2-eq., RS VS LA: 4.67 kg CO2-eq., VS LF: 3.03 kg CO2-eq., RS VS LF: 4.77 kg CO2-eq.	Vaud, Valais and Geneva, Switzerland
39	Lee et al. 2021	Life cycle analysis of renewable natural gas and lactic acid production from waste feedstocks	Cradle-to-gate	1) per dry kg of waste treated, 2) per MJ or kg of product	Renewable natural gas (RNG) and Lactic acid (LA)	GREET model, GWP 100 from IPCC	Global warming potential (GWP)	RNG from sludge: 27 gCO2-e/MJ, RNG from food waste: -87 gCO2-e/MJ, RNG from swine manure: -146 gCO2-e/MJ, RNG from FOG: -68 gCO2-e/MJ, LA from sludge: -1.4 kgCO2-e/kg, LA from food waste: -2.2 kgCO2-e/kg, LA from swine manure: -4.9 kgCO2-e/kg, LA from FOG: -1.2 kgCO2-e/kg	United States
40	Mandegari et al. 2017	Multi-criteria analysis of a biorefinery for co-production of lactic acid and ethanol from sugarcane lignocellulose	Cradle-to-gate	1 tonne LA produced	Lactic acid	CML-IA baseline 3.02	Abiotic depletion, Global warming potential (GWP100), Acidification, Eutrophication, Ozone depletion (ODP), Photochemical oxidation (POCP), Terrestrial and aquatic eco-toxicity, Human toxicity	Scenario 1: 0.1 kg CO2-eq., Scenario 2: 0.3 kg CO2-eq., Scenario 3: 0.4 kg CO2-eq., Scenario 4: 0.5 kg CO2-eq.	South Africa
41	Ding et al. 2023	Relay photo/thermal catalysis enables efficient cascade upgrading of sugars to lactic acid: Mechanism study and life cycle assessment	Cradle-to-gate	1 kg of lactic acid	Lactic acid	TRACI	Global warming potential (GWP), Acidification potential, Eutrophication potential, Fossil fuels resource depletion, Ecotoxicity potential	Biobased-LA: 2.97 kg CO2-eq./kg LA, Conventional LA: 4.30 kg CO2-eq./kg LA	Not mentioned
42	Meghana et al. 2021	Valorization of sugarcane bagasse to lactic acid: Life cycle assessment and Techno-economic evaluation in Indian scenario	Cradle-to-gate	1 kg of lactic acid	Lactic acid	ReCiPe Midpoint (H)	Global warming potential (GWP), Water depletion, Agricultural land occupation	Bagasse-based LA process: 4.62 kg CO2-eq./kg	India
43	Lopes et al. 2019	Techno-economic and life-cycle assessments of small-scale biorefineries for isobutene and xylo-oligosaccharides production: a comparative study in Portugal and Chile	Cradle-to-gate	1 t of lignocellulosic feedstock	Isobutene and XOS	ReCiPe Midpoint (H)	Climate change (CC), Ozone depletion (OD), Terrestrial acidification (TA), Freshwater eutrophication (FE), Marine eutrophication (ME), Particulate matter formation (PMF), Agricultural land occupation (ALO), Water depletion (WD), Fossil depletion (FD)	Portugal: 2.72 kg CO2-eq./kg isobutene, Chile: 2.19 kg CO2-eq./kg isobutene	Portugal and Chile
44	Fazeni-Fraisl and Lindorfer. 2022	Comparative life cycle assessment of first- and second-generation bio-isobutene as a drop-in substitute for fossil isobutene	Cradle-to-gate	1 kg of bio-based IBN	Bio-isobutene (IBN)	CML 2016	Global warming potential (GWP), Eutrophication potential (EP), Acidification potential (AP), Freshwater aquatic ecotoxicity potential, Abiotic depletion potential, Photochemical ozone creation potential (POCP), Ozone depletion potential (ODP), Marine aquatic ecotoxicity potential (MAETP), Terrestrial ecotoxicity potential (TETP), Human toxicity potential (HTP)	Scenario 1: up to 68% GWP savings compared with fossil IBN, Scenario 4: approximately 62% GWP savings compared with fossil IBN, Scenario 5: approximately 63% GWP savings compared with fossil IBN, Scenario 8: 105% GWP savings compared with fossil IBN, Scenario 9: approximately 70% GWP savings compared with fossil IBN, Scenario 7: increase in GWP by 50%	Unspecified EU country
45	Berger et al. 2022	The techno-economic feasibility and carbon footprint of recycling and electrolysing CO2 emissions into ethanol and syngas in an isobutene biorefinery	Gate-to-gate	1 kg of isobutene (IBN), 1 kg of ethanol (EtOH), 1 kg of syngas	Isobutene, Ethanol, Syngas	GaBi_ts 9.5	Global warming potential (GWP)	Scenario 1: 0.293 kg CO2-eq./kg IBN, Scenario 2: 0.350 kg CO2-eq./kg EtOH, Scenario 3: 0.193 kg CO2-eq./kg Syngas	France
46	Cabrera Camacho et al. 2020	Techno-economic and Life-Cycle Assessment of One-Step Production of 1,3-Butadiene from Bioethanol Using Reaction Data under Industrial Operating Conditions	Cradle-to-gate	1 tonne of produced 1,3-BD	1,3-Butadiene (1,3-BD)	ReCiPe2016 midpoint (H) V1.02	Global warming potential (GWP100), Water consumption (WC), Cumulative energy demand (CED)	B1BR: -73 kg CO2-eq/tonne 1, 3-BD, B2BR: -52 kg CO2-eq/tonne 1, 3-BD	The United States, Brazil, and Europe
47	Cabrera Camacho et al. 2022	Assessing the economic and environmental sustainability of bio-olefins: The case of 1,3-butadiene production from bioethanol	Cradle-to-gate	1 tonne of 1,3-butadiene (1,3-BD)	1,3-butadiene (1,3-BD)	ReCiPe 2016	Global warming potential (GWP), Water consumption (WC), Cumulative energy demand (CED)	Naphtha-cracking: 2.5 kg CO2-eq/kg BD, One-step B1: -0.07 kg CO2-eq/kg BD, One-step B2: -0.05 kg CO2-eq/kg BD, Two-step B3: 1.29 kg CO2-eq/kg BD, Two-step B4: 2.31 kg CO2-eq/kg BD	Brazil
48	Shylesh et al. 2016	From Sugars to Wheels: The Conversion of Ethanol to 1,3-Butadiene over Metal-Promoted Magnesia-Silicate Catalysts	Not mentioned	Not mentioned	1,3-Butadiene (1,3-BD)	Not mentioned	Global warming potential (GWP)	1, 3-BD from corn grain ethanol: 39-40% increase in GHG emissions compared to petroleum-based 1, 3-BD, 1, 3-BD from sugarcane ethanol: 150% decrease in GHG emissions compared to petroleum-based 1, 3-BD, 1, 3-BD from corn stover ethanol: 140% decrease in GHG emissions compared to petroleum-based 1, 3-BD	USA and Brazil
49	Farzad et al. 2017	Integrated techno-economic and environmental analysis of butadiene production from biomass	Cradle-to-gate	1 tonne BD produced	Butadiene	CML-IA baseline 3.02	Abiotic depletion, Global warming potential (GWP 100), Acidification, Eutrophication, Ozone depletion (ODP), Photochemical oxidation (POCP), Terrestrial and aquatic eco-toxicity, Human toxicity	Scenario BD-b: 72 kg CO2-eq./tonne, Scenario BD-c: 72 kg CO2-eq./tonne	South Africa
50	Cespi et al. 2016	Butadiene from biomass, a life cycle perspective to address sustainability in the chemical industry	Cradle-to-gate	1 ton of BD	1,3-butadiene (BD)	ReCiPe	Global warming potential (GWP), Water depletion, Cumulative Energy Demand (CED), Particulate matter formation, Agricultural land occupation, Terrestrial ecotoxicity	Sugarcane-based Lebedev process: 2.04 t CO2-eq./t, Conventional route: 2.13 t CO2-eq./t, EU Lebedev process with residual wood-chips: 1.49 t CO2-eq./t	EU, Brazil, US
51	Rodgers et al. 2022	Renewable butadiene: A case for hybrid processing via bio- and chemo-catalysis	Cradle-to-gate	1 kg of butadiene	Butadiene	Not mentioned	Global warming potential (GWP)	Acet-BD: -3.23 kg CO2-eq/kg butadiene, Eth-BD: -2.80 kg CO2-eq/kg butadiene, Syn-BD: -1.60 kg CO2-eq/kg butadiene	China
52	Sadhukhan et al. 2019	Novel macroalgae (seaweed) biorefinery systems for integrated chemical, protein, salt, nutrient and mineral extractions and environmental protection by green synthesis and life cycle sustainability assessments	Not mentioned	1 kg dry macroalgae	Protein, sugar, inorganic platforms, levulinic acid, FDCA, succinic acid, lactic acid	CML	Global warming potential (GWP), Fossil fuel depletion, Freshwater aquatic ecotoxicity	Integrated biorefinery producing protein, sugar and inorganic platforms: 2.87 to 0.05 kg CO2-eq./kg dry macroalgae, Levulinic acid: 0.31 to none kg CO2-eq./kg dry macroalgae, FDCA: 0.82 to none kg CO2-eq./kg dry macroalgae, Succinic acid: 0.87 to none kg CO2-eq./kg dry macroalgae, Lactic acid: 0.99 to none kg CO2-eq./kg dry macroalgae, Levulinic acid: 3.75 kg CO2-eq./kg chemical product, FDCA: 0.…	Switzerland, Great Britain, Global
53	Isoni et al. 2018	Biomass to levulinic acid: A techno-economic analysis and sustainability of biorefinery processes in Southeast Asia	Not mentioned	Not mentioned	Levulinic acid	Not mentioned	Global warming potential (GWP)	Distillation (aqueous): 98-161 ktonne CO2-eq/yr, Distillation (MIBK): 12-20 ktonne CO2-eq/yr, Distillation (2-MeTHF): 0.6-0.9 ktonne CO2-eq/yr	Southeast Asia
54	Hafyan et al. 2020	Sustainability assessment of levulinic acid and succinic acid production from empty fruit bunch	Gate-to-gate	1 kg output chemical obtained through each process	Levulinic acid and Succinic acid	Not mentioned	Global warming potential (GWP)	Levulinic acid: 6.3 kg CO2-eq/kg, Succinic acid: 11.2 kg CO2-eq/kg	Malaysia
55	Thompson et al. 2021	Comparison of pyrolysis and hydrolysis processes for furfural production from sugar beet pulp: A case study in southern Idaho, USA	Gate-to-gate	1 metric ton of furfural	Furfural	CMLIA baseline method	Global warming potential (GWP)	Pyrolysis: 267 kg CO2-eq./metric ton, Hydrolysis: 1095 kg CO2-eq./metric ton	Southern Idaho, USA
56	Luo et al. 2021	Comparative Study of Different Hybrid Life Cycle Assessment Methodologies Applied to Biomass-based Chemical Production	Cradle-to-gate	1 kg of p-Xylene or PSA produced	p-Xylene and Pressure-Sensitive Adhesive (PSA)	TRACI 2.1	Global warming potential (GWP), Ozone depletion, Acidification, Eutrophication, Respiratory effects, Smog, Human carcinogenics, Human non-carcinogenics	MSH process without selling electricity to the grid: Lower GWP than CA process, MSH process selling electricity to the grid: Better GWP than CA p-Xylene process	Not mentioned
57	Athaley et al. 2019	Techno-economic and life cycle analysis of different types of hydrolysis process for the production of p-Xylene	Cradle-to-gate	1 metric ton of p-Xylene	p-Xylene	ReCiPe midpoint method	Climate change, Water depletion, Ecotoxicity, Fossil depletion, Land occupation	Not mentioned	USA
58	Lin et al. 2015	Life Cycle Assessment of Biobased p-Xylene Production	Cradle-to-gate	1 metric ton of pX	pX (p-xylene)	ReCiPe v1.0	Ozone depletion, Human toxicity, Ecotoxicity, Ionizing radiation, Photochemical oxidant formation, Particulate matter formation, Climate change, Terrestrial ecotoxicity, Terrestrial acidification, Agricultural land occupation, Urban land occupation, Natural land transformation, Marine ecotoxicity, Marine eutrophication, Freshwater eutrophication, Freshwater ecotoxicity, Fossil fuel depletion, Min…	Starch-based pX: 8540 kg CO2-eq, Oak-based pX: 1660 kg CO2-eq	United States
59	Rosental et al. 2020	Life Cycle Assessment of Carbon Capture and Utilization for the Production of Large Volume Organic Chemicals	Cradle-to-gate	1,000 kg of a CCU product	Methanol, Ethylene, Propylene, Benzene, Toluene, Mixed Xylenes	IPCC 2013	Global warming potential (GWP), Cumulated energy demand (CED), Acidification potential (AP), Eutrophication potential (EP), Ozone depletion potential (ODP), Particulate matter formation (PM 2.5)	Methanol: 50â€“540 kg CO2-eq/FU, Olefins: 50â€“540 kg CO2-eq/FU, BTX: 50â€“540 kg CO2-eq/FU	Germany
60	Zheng et al. 2018	Life-cycle assessment and techno-economic analysis of the utilization of bio-oil components for the production of three chemicals	Cradle-to-gate	1 kg of BO-LG, BO-resin, or BO-deicer	BO-LG, BO-resin, BO-deicer	Not mentioned	Global warming potential (GWP100a), Cumulative energy demand (CED), Eco-indicator 99 (EI-99)	BO-LG: 2.19 kg CO2-eq/kg, BO-resin: 0.934 kg CO2-eq/kg, BO-deicer: 22.3 kg CO2-eq/kg	Not mentioned
61	Perederic et al. 2020	Life Cycle Analysis of Phenol - Formaldehyde Resins Substituted with Lignin	Gate-to-Gate and Cradle-to-Gate	1 kg of resin	Resin (PF, LPF, LF)	LC Soft (ICAS)	Global warming potential (GWP), Ozone depletion potential (ODP), Photochemical oxidation potential (PCOP), Acidification potential (AP), Human toxicity potential by ingestion (HTPI), Human toxicity by exposure (HTPE), Aquatic toxicity potential (ATP), Human toxicity carcinogenic (HTC), Human toxicity non-carcinogenic (HTNC), Fresh water ecotoxicity (ET), Non-renewable resources, Photochemical ozo…	PF: 0.072 kg CO2-eq, LPF: 0.072 kg CO2-eq, LF: 0.072 kg CO2-eq	Not mentioned
62	Patel et al. 2022	Technoeconomic and Life-Cycle Assessment for Electrocatalytic Production of Furandicarboxylic Acid	Cradle-to-gate	100 tonne/day of FDCA at the factory gate	FDCA	ReCiPe 1.1 hierarchist method	Climate change (CC), Agricultural land occupation (ALO), Fossil depletion (FD), Freshwater eutrophication (FE), Freshwater ecotoxicity (FET), Human toxicity (HT), Marine ecotoxicity (MET), Ozone depletion (OD), Photochemical oxidant formation (POF), Terrestrial acidification (TA), Urban land occupation (ULO), Water depletion (WD)	Not mentioned	Quebec, Canada
63	Kim et al. 2020	Sustainable Production of Bioplastics from Lignocellulosic Biomass: Technoeconomic Analysis and Life-Cycle Assessment	Cradle-to-gate	1.0 kg of FDCA and 1.0 kg of TPA	FDCA and TPA	ReCiPe 1.13 with the Hierarchist perspective	Climate change (CC), Fossil depletion (FD), Metal depletion, Water depletion, Freshwater ecotoxicity, Terrestrial ecotoxicity, Human toxicity, Freshwater eutrophication, Terrestrial acidification, Ozone depletion	Biomass-derived FDCA: 29% higher in CC compared to petroleum-derived TPA	Worldwide
64	Kim et al. 2022	Integrative technical, economic, and environmental sustainability analysis for the development process of biomass-derived 2,5-furandicarboxylic acid	Cradle-to-gate	1.0 kg of FDCA at the factory gate	FDCA	ReCiPe 1.13 Hierarchist mid-point	Climate change (CC), Fossil depletion (FD)	Total CC: 2.8 kg CO2-eq., HMF production subsystem: 2.4 kg CO2-eq., FDCA production subsystem: 0.24 kg CO2-eq., Biomass fractionation subsystem: 0.16 kg CO2-eq.	Not mentioned
65	Isola et al. 2017	Life cycle assessment of photodegradable polymeric material derived from renewable bioresources	Cradle-to-gate	1 g of photodegradable polymer	Photodegradable polymer	ReCiPe	Climate change, Ecotoxicity, Human toxicity, Freshwater eutrophication, Fossil depletion, Terrestrial acidification, Agricultural land occupation	Stage I: 0.019 kg CO2-eq., Stage II: 4.522 kg CO2-eq., Stage III: 4.624 kg CO2-eq., Stage IV: 5.562 kg CO2-eq., Stage V: 26.030 kg CO2-eq., Stage VI: 12.267 kg CO2-eq., Total: 53.019 kg CO2-eq.	South Dakota, United States

## Sheet: LCI (ground-truth)
ID	Row number	Flow name	Input/Output	Amount	Unit	Pathway	Activity
1	1	Raw coal	Input	133.4	t	CTM	Coal mining/Straw production and processing
1	2	Fuel coal	Input	9004.56	kg	CTM	Coal mining/Straw production and processing
1	3	Natural gas	Input	86.34	m	CTM	Coal mining/Straw production and processing
1	4	Diesel	Input	72.08	kg	CTM	Coal mining/Straw production and processing				Note: The blank space indicates redundant data extracted by the LLM (to align with the row number of LCI_LLM generation)
1	5	Gasoline	Input	66.54	kWh	CTM	Coal mining/Straw production and processing
1	6	Electricity	Input	8533.29	kWh	CTM	Coal mining/Straw production and processing
1	7	Coal	Output	120.5	t	CTM	Coal mining/Straw production and processing
1	8	Coal cinder	Output	12.9	t	CTM	Coal mining/Straw production and processing
1	9	Highway	Input	100	km	CTM	Transportation
1	10	Railway	Input	500	km	CTM	Transportation
1	11	Coal	Output	120.5	t	CTM	Transportation
1	12	Electricity	Input	3583.46	kWh	CTM	Pretreatment
1	13	Fuel gas	Input	22495.6	MJ	CTM	Pretreatment
1	14	Steam	Input	549.86	MJ	CTM	Pretreatment
1	15	Coal	Output	120.4	t	CTM	Pretreatment
1	16	Ash	Output	321.59	kg	CTM	Pretreatment
1	17	O2	Input	105.8	t	CTM	Gasification
1	18	Electricity	Input	3237.14	kWh	CTM	Gasification
1	19	Steam	Input	189.01	t	CTM	Gasification
1	20	Crude syngas	Output	431.06	t	CTM	Gasification
1	21	Ash	Output	12.24	t	CTM	Gasification
1	22	Tar	Output	1.33	t	CTM	Gasification
1	23	N2	Input	45.36	t	CTM	WGS + AGR
1	24	Electricity	Input	716.62	kWh	CTM	WGS + AGR
1	25	Steam	Input	231463	MJ	CTM	WGS + AGR
1	26	Syngas	Output	93.13	t	CTM	WGS + AGR
1	27	H2S	Output	729.17	kg	CTM	WGS + AGR
1	28	CO2	Output	169.12	t	CTM	WGS + AGR
1	29	Electricity	Input	782.79	kWh	CTM	Methanol synthesis and purification
1	30	Steam	Input	430773	MJ	CTM	Methanol synthesis and purification
1	31	Methanol	Output	78.98	t	CTM	Methanol synthesis and purification
1	32	CO2	Output	296.13	kg	CTM	Methanol synthesis and purification
1	33	CO	Output	45.64	kg	CTM	Methanol synthesis and purification
1	34	VOC	Output	534.04	kg	CTM	Methanol synthesis and purification
1	35	Waste water	Output	5004	kg	CTM	Methanol synthesis and purification
1	36	CO2	Input	44.64	t	BTM	Straw production and processing
1	37	Diesel	Input	563.42	kg	BTM	Straw production and processing
1	38	Gasoline	Input	250.4	kg	BTM	Straw production and processing
1	39	Electricity	Input	31.3	kWh	BTM	Straw production and processing
1	40	Fertilizer	Input	1.76	t	BTM	Straw production and processing
1	41	Land	Input	82871	m	BTM	Straw production and processing
1	42	Straw	Output	137.6	t	BTM	Straw production and processing
1	43	Highway	Input	100	km	BTM	Transportation
1	44	Railway	Input	500	km	BTM	Transportation
1	45	Straw	Output	137.6	t	BTM	Transportation
1	46	Electricity	Input	5276.59	kWh	BTM	Pretreatment
1	47	Straw	Output	137.6	t	BTM	Pretreatment
1	48	Ash	Output	162.77	kg	BTM	Pretreatment
1	49	O2	Input	96.05	t	BTM	Gasification
1	50	Electricity	Input	6777.95	kWh	BTM	Gasification
1	51	Steam	Input	132.13	t	BTM	Gasification
1	52	Crude syngas	Output	417.63	t	BTM	Gasification
1	53	Ash	Output	3.7	t	BTM	Gasification
1	54	Tar	Output	1.33	t	BTM	Gasification
1	55	N2	Input	24.21	t	BTM	WGS + AGR
1	56	Electricity	Input	386.97	kWh	BTM	WGS + AGR
1	57	Steam	Input	134249	MJ	BTM	WGS + AGR
1	58	Syngas	Output	101.8	t	BTM	WGS + AGR
1	59	H2S	Output	52.88	kg	BTM	WGS + AGR
1	60	CO2	Output	92.24	t	BTM	WGS + AGR
1	61	Electricity	Input	782.79	kWh	BTM	Methanol synthesis and purification
1	62	Steam	Input	436053	MJ	BTM	Methanol synthesis and purification
1	63	Methanol	Output	79.08	t	BTM	Methanol synthesis and purification
1	64	CH4	Output	9425.96	kg	BTM	Methanol synthesis and purification
1	65	CO2	Output	262.68	kg	BTM	Methanol synthesis and purification
1	66	CO	Output	49	kg	BTM	Methanol synthesis and purification
1	67	VOC	Output	780.36	kg	BTM	Methanol synthesis and purification
1	68	Waste water	Output	5210	kg	BTM	Methanol synthesis and purification
2	1	CO2 absorbed	Input	4.22	kg	Methanol production	Sugarcane cultivation, harvesting and transportation
2	2	Ammonium sulfate, as N	Input	9.4x10-4	kg	Methanol production	Sugarcane cultivation, harvesting and transportation
2	3	Urea, as N	Input	2.8x10-3	kg	Methanol production	Sugarcane cultivation, harvesting and transportation
2	4	Ammonium nitrate phosphate, as N	Input	9.4x10-4	kg	Methanol production	Sugarcane cultivation, harvesting and transportation
2	5	Diammonium phosphate, as N	Input	1.1x10-3	kg	Methanol production	Sugarcane cultivation, harvesting and transportation
2	6	Potassium nitrate, as N	Input	5.9x10-5	kg	Methanol production	Sugarcane cultivation, harvesting and transportation
2	7	Diammonium phosphate, as P2O5	Input	2.4x10-3	kg	Methanol production	Sugarcane cultivation, harvesting and transportation
2	8	Superphosphate, as P2O5	Input	1.6x10-3	kg	Methanol production	Sugarcane cultivation, harvesting and transportation
2	9	Triple superphosphate, as P2O5	Input	8.7x10-4	kg	Methanol production	Sugarcane cultivation, harvesting and transportation
2	10	Phosphate, as P2O5	Input	2.7x10-4	kg	Methanol production	Sugarcane cultivation, harvesting and transportation
2	11	Potassium chloride, as K2O	Input	1.1x10-2	kg	Methanol production	Sugarcane cultivation, harvesting and transportation
2	12	Potassium sulfate, as K2O	Input	1.2x10-4	kg	Methanol production	Sugarcane cultivation, harvesting and transportation
2	13	Potassium nitrate, as K2O	Input	1.2x10-5	kg	Methanol production	Sugarcane cultivation, harvesting and transportation
2	14	Vinasse from sugarcane	Input	10.6	kg	Methanol production	Sugarcane cultivation, harvesting and transportation
2	15	Lime	Input	3.7x10-2	kg	Methanol production	Sugarcane cultivation, harvesting and transportation
2	16	Diesel	Input	1.5x10-2	l	Methanol production	Sugarcane cultivation, harvesting and transportation
2	17	Land use	Input	1.049	m	Methanol production	Sugarcane cultivation, harvesting and transportation
2	18	Transport, tractor	Input	2.8x10-2	t km	Methanol production	Sugarcane cultivation, harvesting and transportation
2	19	Water	Input	3.7	m3	Methanol production	Sugarcane milling
2	20	Steam	Input	1.76	kg	Methanol production	Sugarcane milling
2	21	Sugarcane	Input	7.04	kg	Methanol production	Sugarcane milling
2	22	Electricity	Input	1.1	kWh	Methanol production	Pre-treatment
2	23	Bagasse	Input	2	kg	Methanol production	Pre-treatment
2	24	Electricity	Input	1.43	kWh	Methanol production	Gasification
2	25	Oxygen	Input	5.5x10-1	kg	Methanol production	Gasification
2	26	Steam	Input	1.79	kg	Methanol production	Gasification
2	27	Electricity	Input	9.3	kWh	Methanol production	Syngas conditioning and methanol synthesis
2	28	Steam (conditions: 165 °C and 0.68 MPa)	Input	1.73	kg	Methanol production	Syngas conditioning and methanol synthesis
2	29	Syngas	Input	4.2	kg	Methanol production	Syngas conditioning and methanol synthesis
2	30	CO2	Output	6.58	g	Methanol production	Sugarcane cultivation, harvesting and transportation
2	31	NOx	Output	5.4x10-2	g	Methanol production	Sugarcane cultivation, harvesting and transportation
2	32	CO	Output	1.24x10-2	g	Methanol production	Sugarcane cultivation, harvesting and transportation
2	33	Fine particles	Output	1.3x10-3	g	Methanol production	Sugarcane cultivation, harvesting and transportation
2	34	Organic carbon	Output	2.5x10-4	g	Methanol production	Sugarcane cultivation, harvesting and transportation
2	35	Nitrate	Output	2.8x10-3	mg	Methanol production	Sugarcane cultivation, harvesting and transportation
2	36	Silicon	Output	8.4x10-3	mg	Methanol production	Sugarcane cultivation, harvesting and transportation
2	37	Ammonium	Output	9.2x10-3	mg	Methanol production	Sugarcane cultivation, harvesting and transportation
2	38	Sulfate	Output	1.3x10-2	mg	Methanol production	Sugarcane cultivation, harvesting and transportation
2	39	Alkanes	Output	1.1x10-4	g	Methanol production	Sugarcane cultivation, harvesting and transportation
2	40	Olefins	Output	1.2x10-4	mg	Methanol production	Sugarcane cultivation, harvesting and transportation
2	41	Aromatics	Output	9.8x10-2	mg	Methanol production	Sugarcane cultivation, harvesting and transportation
2	42	Formaldehyde	Output	1.5x10-4	g	Methanol production	Sugarcane cultivation, harvesting and transportation
2	43	Acetaldehyde	Output	2.9x10-4	g	Methanol production	Sugarcane cultivation, harvesting and transportation
2	44	Propanal	Output	9.8x10-2	g	Methanol production	Sugarcane cultivation, harvesting and transportation
2	45	Acetone	Output	1.5x10-4	g	Methanol production	Sugarcane cultivation, harvesting and transportation
2	46	Aromatic acids	Output	1.4x10-2	mg	Methanol production	Sugarcane cultivation, harvesting and transportation
2	47	CO2 (Tractor emissions)	Output	30	g	Methanol production	Sugarcane cultivation, harvesting and transportation
2	48	HC	Output	9.9x10-2	g	Methanol production	Sugarcane cultivation, harvesting and transportation
2	49	CO (Tractor emissions)	Output	2.7x10-1	g	Methanol production	Sugarcane cultivation, harvesting and transportation
2	50	NOx (Tractor emissions)	Output	6.8x10-1	g	Methanol production	Sugarcane cultivation, harvesting and transportation
2	51	SOx (Tractor emissions)	Output	4.8x10-2	g	Methanol production	Sugarcane cultivation, harvesting and transportation
2	52	PM10 (Tractor emissions)	Output	7.2x10-2	g	Methanol production	Sugarcane cultivation, harvesting and transportation
2	53	N2O from denitrification	Output	1.37	g	Methanol production	Sugarcane cultivation, harvesting and transportation
2	54	N2 from denitrification	Output	2.28	g	Methanol production	Sugarcane cultivation, harvesting and transportation
2	55	NH3 from volatilization	Output	3.6x10-1	g	Methanol production	Sugarcane cultivation, harvesting and transportation
2	56	N2O (pre-harvest burning)	Output	4x10-2	g	Methanol production	Sugarcane cultivation, harvesting and transportation
2	57	NOx (pre-harvest burning)	Output	2.51	g	Methanol production	Sugarcane cultivation, harvesting and transportation
2	58	CH4 (pre-harvest burning)	Output	6.8x10-1	g	Methanol production	Sugarcane cultivation, harvesting and transportation
2	59	SOx (pre-harvest burning)	Output	3.1x10-1	g	Methanol production	Sugarcane cultivation, harvesting and transportation
2	60	NMVOC	Output	1.54	g	Methanol production	Sugarcane cultivation, harvesting and transportation
2	61	Phosphorous	Output	2.8x10-2	g	Methanol production	Sugarcane cultivation, harvesting and transportation
2	62	Nitrate (to water)	Output	1.48x10-1	g	Methanol production	Sugarcane cultivation, harvesting and transportation
2	63	Ash	Output	40.7	g	Methanol production	Gasification
2	64	Tar	Output	16.8	g	Methanol production	Gasification
2	65	Particulates	Output	4.18	g	Methanol production	Gasification
2	66	Alkalis	Output	6.5x10-1	g	Methanol production	Gasification
2	67	SOx	Output	5	PPM	Methanol production	Gasification
2	68	NOx	Output	58	PPM	Methanol production	Gasification
2	69	TOC	Output	400	PPM	Methanol production	Gasification
2	70	Residual gas	Output	90	g	Methanol production	Syngas conditioning and methanol synthesis
2	71	CO	Output	1.12	g	Methanol production	Syngas conditioning and methanol synthesis
2	72	CH3OH (VOC)	Output	6.49x10-2	g	Methanol production	Syngas conditioning and methanol synthesis
2	73	Others VOC	Output	2.48x10-2	g	Methanol production	Syngas conditioning and methanol synthesis
2	74	CH4	Output	2.34x10-1	g	Methanol production	Syngas conditioning and methanol synthesis
2	75	CO2	Output	1830	g	Methanol production	Syngas conditioning and methanol synthesis
2	76	NOx	Output	9.28x10-1	g	Methanol production	Syngas conditioning and methanol synthesis
2	77	PM10	Output	9.3x10-1	g	Methanol production	Syngas conditioning and methanol synthesis
2	78	SO2	Output	5.24x10-1	g	Methanol production	Syngas conditioning and methanol synthesis
2	79	Slag	Output	410	g	Methanol production	Syngas conditioning and methanol synthesis
6	1	N fertiliser (NH4NO3)	Input	0.2849	t	Catalytic HTG	Chemicals production
6	2	Energy for N fertiliser production	Input	4.778	MWh	Catalytic HTG	Chemicals production
6	3	P fertiliser (ammonium nitrate phosphate)	Input	0.0607	t	Catalytic HTG	Chemicals production
6	4	Energy for P fertiliser production	Input	0.3194	MWh	Catalytic HTG	Chemicals production
6	5	NaOH catalyst	Input	0.5517	t	Catalytic HTG	Chemicals production
6	6	Energy for NaOH catalyst production	Input	1.297	MWh	Catalytic HTG	Chemicals production
6	7	Aluminium sulfate flocculant	Input	0.07259	t	Catalytic HTG	Chemicals production
6	8	Energy for aluminium sulfate production	Input	0.2642	MWh	Catalytic HTG	Chemicals production
6	9	CO2 uptake	Input	2.188	t	Catalytic HTG	Biofixation of CO2
6	10	Microalgae feedstock	Input	1.452	t	Catalytic HTG	Biofixation of CO2
6	11	Paddlewheels	Input	3.3	MWh	Catalytic HTG	Biofixation of CO2
6	12	Lamella clarifier and centrifuge	Input	0.03208	MWh	Catalytic HTG	Biofixation of CO2
6	13	Transportation of feedstock	Input	145.2	tkm	Catalytic HTG	Biofixation of CO2
6	14	Produced Fuel gas	Input	1.018	t	Catalytic HTG	Hydrothermal Conversion
6	15	Energy need of HTG	Input	13.22	MWh	Catalytic HTG	Hydrothermal Conversion
6	16	The required amount of CO2	Input	0.064	t	Catalytic HTG	Fuel gas reforming
6	17	Required amount of O2	Input	0.04643	t	Catalytic HTG	Fuel gas reforming
6	18	Required amount of steam	Input	93.68	t	Catalytic HTG	Fuel gas reforming
6	19	Required energy	Input	4.613	MWh	Catalytic HTG	Fuel gas reforming
6	20	Mass of required H2	Input	0.0363	t	Catalytic HTG	Water electrolysis
6	21	The energy need of water electrolysis	Input	2.053	MWh	Catalytic HTG	Water electrolysis
6	22	Required energy	Input	4.374	MWh	Catalytic HTG	Methanol synthesis
6	23	N fertiliser (NH4NO3)	Input	0.3108	t	Non-catalytic HTG	Chemicals production
6	24	Energy for N fertiliser production	Input	5.194	MWh	Non-catalytic HTG	Chemicals production
6	25	P fertiliser (ammonium nitrate phosphate)	Input	0.0699	t	Non-catalytic HTG	Chemicals production
6	26	Energy for P fertiliser production	Input	0.3694	MWh	Non-catalytic HTG	Chemicals production
6	27	Aluminium sulfate flocculant	Input	0.07921	t	Non-catalytic HTG	Chemicals production
6	28	Energy for aluminium sulfate production	Input	0.2889	MWh	Non-catalytic HTG	Chemicals production
6	29	CO2 uptake	Input	2.387	t	Non-catalytic HTG	Biofixation of CO2
6	30	Microalgae feedstock	Input	1.584	t	Non-catalytic HTG	Biofixation of CO2
6	31	Paddlewheels	Input	3.6	MWh	Non-catalytic HTG	Biofixation of CO2
6	32	Lamella clarifier and centrifuge	Input	0.03499	MWh	Non-catalytic HTG	Biofixation of CO2
6	33	Transportation of feedstock	Input	0.1584	tkm	Non-catalytic HTG	Biofixation of CO2
6	34	Produced Fuel gas	Input	0.9951	t	Non-catalytic HTG	Hydrothermal Conversion
6	35	Energy need of HTG	Input	15.14	MWh	Non-catalytic HTG	Hydrothermal Conversion
6	36	The required amount of CO2	Input	0.074	t	Non-catalytic HTG	Fuel gas reforming
6	37	Required amount of O2	Input	0.05066	t	Non-catalytic HTG	Fuel gas reforming
6	38	Required amount of steam	Input	126.1	t	Non-catalytic HTG	Fuel gas reforming
6	39	Required energy	Input	5.685	MWh	Non-catalytic HTG	Fuel gas reforming
6	40	Mass of required H2	Input	0.0412	t	Non-catalytic HTG	Methanol synthesis
6	41	The energy need of water electrolysis	Input	2.331	MWh	Non-catalytic HTG	Methanol synthesis
6	42	Required energy for methanol synthesis	Input	4.073	MWh	Non-catalytic HTG	Methanol synthesis
9	1	Feedstock (bone dry)	Input	1.9	t	EAX OC
9	2	Enzymes	Input	16	kg	EAX OC
9	3	Sulfuric Acid	Input	34	kg	EAX OC
9	4	Ammonia	Input	23	kg	EAX OC
9	5	Sodium hydroxide	Input	45	kg	EAX OC
9	6	Clarifier polymer	Input	1.1	kg	EAX OC
9	7	Fermentation nutrients	Input	50	kg	EAX OC
9	8	Lime	Input	26	kg	EAX OC
9	9	Natural gas	Input	53	GJ	EAX OC
9	10	Ethyl acetate	Input	5.2	kg	EAX OC
9	11	Electricity	Input	0	kWh	EAX OC
9	12	Acetic acid	Output	1	t	EAX OC
9	13	Lignin (bone dry)	Output	0	kg	EAX OC
9	14	Electricity	Output	2600	kWh	EAX OC
9	15	CO2 (from lignin)	Output	1.8	t	EAX OC
9	16	CO2 (from natural gas)	Output	2.7	t	EAX OC
9	17	Feedstock (bone dry)	Input	1.9	t	EAX LE
9	18	Enzymes	Input	16	kg	EAX LE
9	19	Sulfuric Acid	Input	34	kg	EAX LE
9	20	Ammonia	Input	23	kg	EAX LE
9	21	Sodium hydroxide	Input	45	kg	EAX LE
9	22	Clarifier polymer	Input	1.1	kg	EAX LE
9	23	Fermentation nutrients	Input	50	kg	EAX LE
9	24	Lime	Input	0	kg	EAX LE
9	25	Natural gas	Input	58	GJ	EAX LE
9	26	Ethyl acetate	Input	5.2	kg	EAX LE
9	27	Electricity	Input	320	kwh	EAX LE
9	28	Acetic acid	Output	1	t	EAX LE
9	29	Lignin (bone dry)	Output	440	kg	EAX LE
9	30	Electricity	Output	0	kwh	EAX LE
9	31	CO2 (from lignin)	Output	0	t	EAX LE
9	32	CO2 (from natural gas)	Output	3.2	t	EAX LE
9	33	Feedstock (bone dry)	Input	1.9	t	ADX OC
9	34	Enzymes	Input	16	kg	ADX OC
9	35	Sulfuric Acid	Input	34	kg	ADX OC
9	36	Ammonia	Input	23	kg	ADX OC
9	37	Sodium hydroxide	Input	45	kg	ADX OC
9	38	Clarifier polymer	Input	1.1	kg	ADX OC
9	39	Fermentation nutrients	Input	50	kg	ADX OC
9	40	Lime	Input	26	kg	ADX OC
9	41	Natural gas	Input	19	GJ	ADX OC
9	42	Alamine	Input	1.9	kg	ADX OC
9	43	Diisobutyl ketone (DIBK)	Input	1.9	kg	ADX OC
9	44	Electricity	Input	0	kWh	ADX OC
9	45	Acetic acid	Output	1	t	ADX OC
9	46	Lignin (bone dry)	Output	0	kg	ADX OC
9	47	Electricity	Output	860	kWh	ADX OC
9	48	CO2 (from lignin)	Output	1.8	t	ADX OC
9	49	CO2 (from natural gas)	Output	0.99	t	ADX OC
9	50	Feedstock (bone dry)	Input	1.9	t	ADX LE
9	51	Enzymes	Input	16	kg	ADX LE
9	52	Sulfuric Acid	Input	34	kg	ADX LE
9	53	Ammonia	Input	23	kg	ADX LE
9	54	Sodium hydroxide	Input	45	kg	ADX LE
9	55	Clarifier polymer	Input	1.1	kg	ADX LE
9	56	Fermentation nutrients	Input	50	kg	ADX LE
9	57	Natural gas	Input	28	GJ	ADX LE
9	58	Electricity	Input	300	kWh	ADX LE
9	59	Alamine	Input	1.9	kg	ADX LE
9	60	Diisobutyl ketone (DIBK)	Input	1.9	kg	ADX LE
9	61	Acetic acid	Output	1	t	ADX LE
9	62	Lignin (bone dry)	Output	440	kg	ADX LE
9	63	CO2 (from natural gas)	Output	1.4	t	ADX LE
11	1	EFB	Input	1.877	kg	Ethanol and ethylene production	Pretreatment and saccharification
11	2	H2O	Input	2.934	kg	Ethanol and ethylene production	Pretreatment and saccharification
11	3	NH3	Input	0.02	kg	Ethanol and ethylene production	Pretreatment and saccharification
11	4	H2SO4	Input	0.033	kg	Ethanol and ethylene production	Pretreatment and saccharification
11	5	Enzyme	Input	0.01	kg	Ethanol and ethylene production	Pretreatment and saccharification
11	6	Heat	Input	1.928	MJ	Ethanol and ethylene production	Pretreatment and saccharification
11	7	Electricity	Input	0.0011	kWh	Ethanol and ethylene production	Pretreatment and saccharification
11	8	Transport	Input	0.05631	tkm	Ethanol and ethylene production	Pretreatment and saccharification
11	9	NH3	Input	0.002	kg	Ethanol and ethylene production	Pretreatment and saccharification
11	10	Hexose and pentose	Output	1	kg	Ethanol and ethylene production	Pretreatment and saccharification
11	11	Lignin	Output	0.48	kg	Ethanol and ethylene production	Pretreatment and saccharification
11	12	H2O	Output	3.86	kg	Ethanol and ethylene production	Pretreatment and saccharification
11	13	Ethanol	Output	0.029	kg	Ethanol and ethylene production	Pretreatment and saccharification
11	14	Acetic acid	Output	0.008	kg	Ethanol and ethylene production	Pretreatment and saccharification
11	15	CO2	Output	0.0077	kg	Ethanol and ethylene production	Pretreatment and saccharification
11	16	CO	Output	1.4e-05	kg	Ethanol and ethylene production	Pretreatment and saccharification
11	17	NOx	Output	9.6e-05	kg	Ethanol and ethylene production	Pretreatment and saccharification
11	18	Hexose and pentose	Input	2.38	kg	Ethanol and ethylene production	Fermentation and ethanol purification
11	19	DAP	Input	0.041	kg	Ethanol and ethylene production	Fermentation and ethanol purification
11	20	Electricity	Input	0.00078	kWh	Ethanol and ethylene production	Fermentation and ethanol purification
11	21	Heat	Input	2.85	MJ	Ethanol and ethylene production	Fermentation and ethanol purification
11	22	Ethanol	Output	0.132	kg	Ethanol and ethylene production	Fermentation and ethanol purification
11	23	Ethanol	Output	1	kg	Ethanol and ethylene production	Fermentation and ethanol purification
11	24	H2O	Output	0.0083	kg	Ethanol and ethylene production	Fermentation and ethanol purification
11	25	Ethanol	Input	1.77	kg	Ethanol and ethylene production	Ethylene production
11	26	NaOH	Input	0.57	kg	Ethanol and ethylene production	Ethylene production
11	27	H2O	Input	0.237	kg	Ethanol and ethylene production	Ethylene production
11	28	Electricity	Input	0.261	kWh	Ethanol and ethylene production	Ethylene production
11	29	Heat	Input	3.76	MJ	Ethanol and ethylene production	Ethylene production
11	30	Catalyst	Input	0.23	kg	Ethanol and ethylene production	Ethylene production
11	31	Bioethylene	Output	1	kg	Ethanol and ethylene production	Ethylene production
11	32	Ethylene	Output	0.001	kg	Ethanol and ethylene production	Ethylene production
11	33	H2O	Output	1.35	kg	Ethanol and ethylene production	Ethylene production
11	34	Ethylene	Output	0.045	kg	Ethanol and ethylene production	Ethylene production
11	35	OH-	Output	0.036	kg	Ethanol and ethylene production	Ethylene production
11	36	CO3 2−	Output	0.042	kg	Ethanol and ethylene production	Ethylene production
11	37	Na[+]	Output	0.082	kg	Ethanol and ethylene production	Ethylene production
11	38	Butene	Output	0.0053	kg	Ethanol and ethylene production	Ethylene production
11	39	Acetaldehyde	Output	0.0033	kg	Ethanol and ethylene production	Ethylene production
15	1	CO2 input	Input	4.557	g	Small-scale experimental setup	Electrochemical process
15	2	Water input	Input	5.877	g	Small-scale experimental setup	Electrochemical process
15	3	Energy requirement for electrochemical process	Input	0.0386	kWh	Small-scale experimental setup	Electrochemical process
15	4	C2H4 (ethylene)	Output	1	g	Small-scale experimental setup	Electrochemical process
15	5	H2 (hydrogen gas)	Output	0.04	g	Small-scale experimental setup	Electrochemical process
15	6	CO (carbon monoxide)	Output	0.377	g	Small-scale experimental setup	Electrochemical process
15	7	CH4 (methane)	Output	0.006	g	Small-scale experimental setup	Electrochemical process
15	8	C2H5OH (ethanol)	Output	0.241	g	Small-scale experimental setup	Electrochemical process
15	9	CH3COOH (acetic acid)	Output	0.067	g	Small-scale experimental setup	Electrochemical process
15	10	HCOOH (formic acid)	Output	0.165	g	Small-scale experimental setup	Electrochemical process
15	11	C3H7OH (1-propanol)	Output	0.042	g	Small-scale experimental setup	Electrochemical process
15	12	H2O	Output	3.276	g	Small-scale experimental setup	Electrochemical process
15	13	O2	Output	5.22	g	Small-scale experimental setup	Electrochemical process
15	14	CO2 input	Input	4.56	t	large-scale model	CO2 capture via MEA
15	15	Water input	Input	5.88	t	large-scale model	CO2 capture via MEA
15	16	Energy use	Input	0.0386	GWh	large-scale model	Electrochemical process
15	17	Mixed products from electrochemical process	Input	10.44	t	large-scale model	adsorption process
15	18
15	19	C2H4 (ethylene)	Output	1	t	large-scale model	adsorption process
15	20	H2 (hydrogen gas)	Output	0.04	t	large-scale model	adsorption process
15	21	CO (carbon monoxide)	Output	0.377	t	large-scale model	adsorption process
15	22	CH4 (methane)	Output	0.006	t	large-scale model	adsorption process
15	23	Mixed chemicals in aqueous form	Output	0.515	t	large-scale model	adsorption process
15	24	Waste water from side reaction in cathode	Output	3.276	t	large-scale model	adsorption process
15	25	O2	Output	5.22	t	large-scale model	adsorption process
16	1	NPK (9-18-27)	Input	6098	t/y	Not mentioned	Fertilizers
16	2	N fertilizer (ammonium nitrate)	Input	2541	t/y	Not mentioned	Fertilizers
16	3
16	4
16	5
16	6	Metil pirimifos	Input	6	t/y	Not mentioned	Pesticides
16	7	Gliphosate	Input	50	t/y	Not mentioned	Pesticides
16	8	Propineb	Input	4	t/y	Not mentioned	Pesticides
16	9	Metil pirimifos	Input	6	t/y	Not mentioned	Pesticides
16	10
16	11
16	12	Diesel	Input	843	t/y	Not mentioned	Diesel
16	13	Electricity	Input	20	MWh/y	Not mentioned	Diesel
16	14	Carbon dioxide	Output	2630	t/y	Not mentioned	Diesel
16	15	Carbon monoxide	Output	9.58	t/y	Not mentioned	Diesel
16	16	Methane	Output	0.14	t/y	Not mentioned	Diesel
16	17	NMVOC	Output	4.36	t/y	Not mentioned	Diesel
16	18	Nitrous oxide	Output	0.1	t/y	Not mentioned	Diesel
16	19	Nitrogen oxides	Output	37.11	t/y	Not mentioned	Diesel
16	20	Particulates	Output	3.77	t/y	Not mentioned	Diesel
16	21	Sulphur dioxide	Output	0.85	t/y	Not mentioned	Diesel
16	22	Ammonia	Output	16.8	kg/y	Not mentioned	Diesel
16	23	Polycyclic aromatic hydrocarbons	Output	2.8	kg/y	Not mentioned	Diesel
16	24	Ammonia	Output	47	t/y	Not mentioned	Electricity
16	25	Nitrous oxide	Output	24	t/y	Not mentioned	Electricity
16	26	Nitrogen oxides	Output	5	t/y	Not mentioned	Electricity
16	27	Nitrate	Output	615	t/y	Not mentioned	Electricity
16	28	Phosphate	Output	11	t/y	Not mentioned	Electricity
16	29	Cadmium	Output	13	kg/y	Not mentioned	Electricity
16	30	Copper	Output	51	kg/y	Not mentioned	Electricity
16	31	Zinc	Output	306	kg/y	Not mentioned	Electricity
16	32	Lead	Output	20	kg/y	Not mentioned	Electricity
16	33	Nickel	Output	59	kg/y	Not mentioned	Electricity
16	34	Chromium	Output	195	kg/y	Not mentioned	Electricity
16	35	Metil pirimifos	Output	6	t/y	Not mentioned	Emissions to soil
16	36	Gliphosate	Output	50	t/y	Not mentioned	Emissions to soil
16	37	Propineb	Output	4	t/y	Not mentioned	Emissions to soil
16	38	Feedstock to the production plant	Input	1.4e-09	t km/y	Not mentioned	Transport
16	39
16	40	Poplar wood (wet)	Input	15847	kg	Direct ethanol dehydration	Biomass
16	41	Alumina	Input	0.2	kg	Direct ethanol dehydration
16	42	Co e Mo	Input	0.11	kg	Direct ethanol dehydration
16	43	Nickel	Input	0.02	kg	Direct ethanol dehydration
16	44	ZnO	Input	0.54	kg	Direct ethanol dehydration
16	45	Zeolite	Input	0.24	kg	Direct ethanol dehydration
16	46	KOH	Input	0.02	kg	Direct ethanol dehydration
16	47	Power generation	Input	1900	kg	Direct ethanol dehydration
16	48	Process	Input	2365	kg	Direct ethanol dehydration
16	49	Wastewater to treatment	Output	12373	kg	Direct ethanol dehydration
16	50	Electricity	Input	1.7	MWh	Direct ethanol dehydration
16	51	Natural gas	Input	84	NmÂ³	Direct ethanol dehydration
16	52	CO biogenic	Output	352	kg	Direct ethanol dehydration
16	53	CO fossil	Output	0.06	kg	Direct ethanol dehydration
16	54	CO2 biogenic	Output	14813	kg	Direct ethanol dehydration
16	55	CO2 fossil	Output	179	kg	Direct ethanol dehydration
16	56	SO2	Output	0.58	kg	Direct ethanol dehydration
16	57	SO3	Output	0.01	kg	Direct ethanol dehydration
16	58	Solid waste to landfill (Biomass chippings)	Output	396	kg	Direct ethanol dehydration
16	59	Ash	Output	100	kg	Direct ethanol dehydration
16	60	Spent catalysts	Output	4.2	kg	Direct ethanol dehydration
16	61	Spent bed materials	Output	0.24	kg	Direct ethanol dehydration
16	62	Wastewater to treatment	Output	12373	kg	Direct ethanol dehydration
16	63	Methanol (co-product)	Output	469	kg	Direct ethanol dehydration
16	64	Propanol (co-product)	Output	182	kg	Direct ethanol dehydration
16	65	Sulphur cake (co-product)	Output	3.59	kg	Direct ethanol dehydration
16	66	Ethylene	Output	65966	t	Direct ethanol dehydration
16	67	Poplar wood (wet)	Input	8636	kg	Indirect ethanol dehydration
16	68	Alumina	Input	0.35	kg	Indirect ethanol dehydration
16	69	Co e Mo	Input	0.07	kg	Indirect ethanol dehydration
16	70	Cu/ZnO	Input	0.03	kg	Indirect ethanol dehydration
16	71	H-Mordenite	Input	0.2	kg	Indirect ethanol dehydration
16	72	Nickel	Input	0.03	kg	Indirect ethanol dehydration
16	73	ZnO	Input	0.7	kg	Indirect ethanol dehydration
16	74	Sand	Input	10.95	kg	Indirect ethanol dehydration
16	75	Zeolite	Input	0.07	kg	Indirect ethanol dehydration
16	76	Monoethanolamine	Input	3.74	kg	Indirect ethanol dehydration
16	77	Diesel	Input	35.82	kg	Indirect ethanol dehydration
16	78	NaOH	Input	0.03	kg	Indirect ethanol dehydration
16	79	Power generation Water	Input	10017	kg	Indirect ethanol dehydration
16	80	Process Water	Input	31458	kg	Indirect ethanol dehydration
16	81	Electricity	Input	0.39	MWh	Indirect ethanol dehydration
16	82	Natural gas	Input	84	Nm³	Indirect ethanol dehydration
16	83	CO biogenic	Output	0	kg	Indirect ethanol dehydration
16	84	CO fossil	Output	0.06	kg	Indirect ethanol dehydration
16	85	CO2 biogenic	Output	292	kg	Indirect ethanol dehydration
16	86	CO2 fossil	Output	9452	kg	Indirect ethanol dehydration
16	87	Biomass (chippings)	Output	216	kg	Indirect ethanol dehydration
16	88	Ash	Output	65	kg	Indirect ethanol dehydration
16	89	Spent catalysts	Output	1.42	kg	Indirect ethanol dehydration
16	90	Spent bed materials	Output	0.07	kg	Indirect ethanol dehydration
16	91	Wastewater to treatment	Output	28586	kg	Indirect ethanol dehydration
16	92	Sulphur cake (70% water)	Output	2.45	kg	Indirect ethanol dehydration
16	93	Ethylene	Output	121048	t	Indirect ethanol dehydration
16	94	Poplar wood (wet)	Input	16889	kg	Dimethyl ether to olefins
16	95	Co e Mo	Input	0.12	kg	Dimethyl ether to olefins
16	96	CZA/HZSM-5	Input	8.4	kg	Dimethyl ether to olefins
16	97	Zeolite	Input	4.2	kg	Dimethyl ether to olefins
16	98	Zeolite	Input	0.03	kg	Dimethyl ether to olefins
16	99	DEPG	Input	1.6	kg	Dimethyl ether to olefins
16	100	KOH	Input	0.03	kg	Dimethyl ether to olefins
16	101	Methanol	Input	0.38	kg	Dimethyl ether to olefins
16	102	Oxygen	Input	8423	kg	Dimethyl ether to olefins
16	103	Water Power generation	Input	1904	kg	Dimethyl ether to olefins
16	104	Process	Input	866	kg	Dimethyl ether to olefins
16	105	Electricity	Input	2.1	MWh	Dimethyl ether to olefins
16	106	CO biogenic	Output	137	kg	Dimethyl ether to olefins
16	107	CO2 fossil	Output	14795	kg	Dimethyl ether to olefins
16	108	SO2	Output	0.47	kg	Dimethyl ether to olefins
16	109	Biomass (chippings)	Output	422	kg	Dimethyl ether to olefins
16	110	Ash	Output	106	kg	Dimethyl ether to olefins
16	111	Spent catalysts	Output	14.48	kg	Dimethyl ether to olefins
16	112	Spent bed materials	Output	0.03	kg	Dimethyl ether to olefins
16	113	Wastewater to treatment	Output	12018	kg	Dimethyl ether to olefins
16	114	Lique fi ed petroleum gas	Output	357	kg	Dimethyl ether to olefins
16	115	Propylene ( > 99.5%)	Output	871	kg	Dimethyl ether to olefins
16	116	Sulphur cake (70% water)	Output	3.85	kg	Dimethyl ether to olefins
16	117	Ethylene	Output	61896	t	Dimethyl ether to olefins
19	1	Fuel Coal	Input	47.3	GJ	CtEG Route	coal transportation
19	2	Diesel	Input	2.47	GJ	CtEG Route	coal transportation
19	3	Gasoline	Input	1.73	GJ	CtEG Route	coal transportation
19	4	Electricity	Input	1.47	GJ	CtEG Route	coal transportation
19	5	CO2	Output	63	kg	CtEG Route	coal transportation
19	6	CH4	Output	0.342	kg	CtEG Route	coal transportation
19	7	N2O	Output	0.000147	kg	CtEG Route	coal transportation
19	8	CO	Output	0.541	kg	CtEG Route	coal transportation
19	9	NOx	Output	0.117	kg	CtEG Route	coal transportation
19	10	SO2	Output	0.0269	kg	CtEG Route	coal transportation
19	11	PM10	Output	0.108	kg	CtEG Route	coal transportation
19	12	VOC	Output	0.008	kg	CtEG Route	coal transportation
19	13
19	14	Fuel Coal	Input	8.69	GJ	OtEG Route	oil mining and processing
19	15	Diesel	Input	6.51	GJ	OtEG Route	oil mining and processing
19	16	gasoline	Input	0.109	GJ	OtEG Route	oil mining and processing
19	17	Electricity	Input	12.9	GJ	OtEG Route	oil mining and processing
19	18	CO2	Output	38	kg	OtEG Route	oil mining and processing
19	19	CH4	Output	89.1	kg	OtEG Route	oil mining and processing
19	20	N2O	Output	0.0651	kg	OtEG Route	oil mining and processing
19	21	CO	Output	0.0977	kg	OtEG Route	oil mining and processing
19	22	NOx	Output	0.0597	kg	OtEG Route	oil mining and processing
19	23	SO2	Output	0.0347	kg	OtEG Route	oil mining and processing
19	24	PM10	Output	0.0934	kg	OtEG Route	oil mining and processing
19	25	VOC	Output	0.076	kg	OtEG Route	oil mining and processing
19	26
19	27
19	28	Diesel	Input	0.206	GJ	OtEG Route	oil transportation
19	29	Electricity	Input	0.182	GJ	OtEG Route	oil transportation
19	30	CO2	Output	65.7	kg	OtEG Route	oil transportation
19	31	CH4	Output	0.41	kg	OtEG Route	oil transportation
19	32	N2O	Output	0.00125	kg	OtEG Route	oil transportation
19	33	CO	Output	0.661	kg	OtEG Route	oil transportation
19	34	NOx	Output	0.141	kg	OtEG Route	oil transportation
19	35	SO2	Output	0.0281	kg	OtEG Route	oil transportation
19	36	PM10	Output	0.132	kg	OtEG Route	oil transportation
19	37	VOC	Output	0.00619	kg	OtEG Route	oil transportation
19	38	Oil	Input	2.31	t	OtEG Route	oil to EG
19	39	Fuel Coal	Input	3.06	GJ	OtEG Route	oil to EG
19	40	Electricity	Input	21	GJ	OtEG Route	oil to EG
19	41	CO2	Output	465	kg	OtEG Route	oil to EG
19	42	CH4	Output	94.5	kg	OtEG Route	oil to EG
19	43	N2O	Output	0.0385	kg	OtEG Route	oil to EG
19	44	CO	Output	37.4	kg	OtEG Route	oil to EG
19	45	NOx	Output	26.8	kg	OtEG Route	oil to EG
19	46	SO2	Output	69.8	kg	OtEG Route	oil to EG
19	47	PM10	Output	2.84	kg	OtEG Route	oil to EG
19	48	VOC	Output	3.48	kg	OtEG Route	oil to EG
19	49
19	50
19	51	diesel	Input	2.48	GJ	BtEG Route	biomass collection
19	52	gasoline	Input	0.0439	GJ	BtEG Route	biomass collection
19	53	electricity	Input	0.000857	GJ	BtEG Route	biomass collection
19	54	CO2	Output	-3.49	kg	BtEG Route	biomass collection
19	55	CH4	Output	3.14	kg	BtEG Route	biomass collection
19	56	N2O	Output	0.00101	kg	BtEG Route	biomass collection
19	57	CO	Output	0.053	kg	BtEG Route	biomass collection
19	58	NOx	Output	0.0671	kg	BtEG Route	biomass collection
19	59	SO2	Output	0.0115	kg	BtEG Route	biomass collection
19	60	PM10	Output	0.0867	kg	BtEG Route	biomass collection
19	61	VOC	Output	0.0498	kg	BtEG Route	biomass collection
19	62
19	63	Diesel	Input	2.02	GJ	BtEG Route	biomass transportation
19	64	Gasoline	Input	0.0952	GJ	BtEG Route	biomass transportation
19	65
19	66	CO2	Output	29.5	kg	BtEG Route	biomass transportation
19	67	CH4	Output	0.0332	kg	BtEG Route	biomass transportation
19	68	N2O	Output	0.0014	kg	BtEG Route	biomass transportation
19	69	CO	Output	0.0872	kg	BtEG Route	biomass transportation
19	70	NOx	Output	0.0813	kg	BtEG Route	biomass transportation
19	71	SO2	Output	0.011	kg	BtEG Route	biomass transportation
19	72	PM10	Output	0.0157	kg	BtEG Route	biomass transportation
19	73	VOC	Output	0.0101	kg	BtEG Route	biomass transportation
19	74	Biomass	Input	2.48	t	BtEG Route	biomass to EG
19	75	Fuel Coal	Input	47.6	GJ	BtEG Route	biomass to EG
19	76	Electricity	Input	3.8	GJ	BtEG Route	biomass to EG
19	77	CO2	Output	3180	kg	BtEG Route	biomass to EG
19	78	CH4	Output	28.2	kg	BtEG Route	biomass to EG
19	79	N2O	Output	0.0859	kg	BtEG Route	biomass to EG
19	80	CO	Output	13.9	kg	BtEG Route	biomass to EG
19	81	NOx	Output	37.7	kg	BtEG Route	biomass to EG
19	82	SO2	Output	21.2	kg	BtEG Route	biomass to EG
19	83	PM10	Output	37.3	kg	BtEG Route	biomass to EG
19	84	VOC	Output	0.0446	kg	BtEG Route	biomass to EG
21	1	Crude palm oil	Input	1055	kg	Palm oil refining process
21	2	Phosphoric acid	Input	0.55	kg	Palm oil refining process
21	3	Bleaching earth	Input	11.1	kg	Palm oil refining process
21	4	Electricity	Input	10.2	kWh	Palm oil refining process
21	5	Natural gas	Input	1.66	kg	Palm oil refining process
21	6	Diesel	Input	0.24	kg	Palm oil refining process
21	7	Fuel oil	Input	0.5	kg	Palm oil refining process
21	8	RBD palm oil	Output	1000	kg	Palm oil refining process
21	9	PFAD	Output	49	kg	Palm oil refining process
21	10	Processed water to river, regionalized, MY	Output	26.71	L	Palm oil refining process
21	11	Biological oxygen demand (BOD)	Output	0.4	g	Palm oil refining process
21	12	Chemical oxygen demand (COD	Output	2.34	g	Palm oil refining process
21	13	Carcass (wet weight)	Input	6.9	kg	AF rendering process
21	14	Electricity	Input	0.24	MJ	AF rendering process
21	15	Natural gas	Input	4.32	MJ	AF rendering process
21	16	Fuel oil	Input	0.53	MJ	AF rendering process
21	17	Electricity	Input	0.24	MJ	AF rendering process
21	18	Fuel oil	Input	0.53	MJ	AF rendering process
21	19	Water	Input	2.75	kg	AF rendering process
21	20	Meat and bone meal	Output	2.56	kg	AF rendering process
21	21	Wastewater	Output	2.68	kg	AF rendering process
21	22	Sludge	Output	0.85	kg	AF rendering process
21	23	Solid waste	Output	0.03	kg	AF rendering process
21	24	Fish cleaning waste	Input	4.76	kg	FF rendering process
21	25	Formic acid	Input	0.118	kg	FF rendering process
21	26	Heat	Input	0.085	MJ	FF rendering process
21	27	Electricity	Input	0.148	MJ	FF rendering process
21	28	Fish remains/fish meal	Output	1.06	kg	FF rendering process
21	29	Fish fat	Output	1	kg	FF rendering process
23	1	Ethylene	Input	1.21	kg	Propylene production from ethylene obtained from bioethanol dehydration	Not mentioned
23	2	H2	Input	0.00068	kg	Propylene production from ethylene obtained from bioethanol dehydration	Not mentioned
23	3	Heavy oil A	Input	4.37	MJ	Propylene production from ethylene obtained from bioethanol dehydration	Not mentioned
23	4	Electricity	Input	2.78	kWh	Propylene production from ethylene obtained from bioethanol dehydration	Not mentioned
23	5	C3H6	Output	1	kg	Propylene production from ethylene obtained from bioethanol dehydration	Not mentioned
23	6	C2H4	Output	0.0195	kg	Propylene production from ethylene obtained from bioethanol dehydration	Not mentioned
23	7	C5H12, C6H14	Output	0.185	kg	Propylene production from ethylene obtained from bioethanol dehydration	Not mentioned
23	8	C3H8	Output	0.00949	kg	Propylene production from ethylene obtained from bioethanol dehydration	Not mentioned
23	9	Fossil-derived CO2	Output	1.52	kg	Propylene production from ethylene obtained from bioethanol dehydration	Not mentioned
23	10	Synthesis gas	Input	2.25	kg	Synthesis gas route	Methanol production from synthesis gas
23	11	Deionized water	Input	0.236	kg	Synthesis gas route	Methanol production from synthesis gas
23	12	Heavy oil A	Input	3.74	MJ	Synthesis gas route	Methanol production from synthesis gas
23	13	Electricity	Input	0.958	kWh	Synthesis gas route	Methanol production from synthesis gas
23	14	Methanol	Output	1	kg	Synthesis gas route	Methanol production from synthesis gas
23	15	Fossil-derived CO2	Output	1.76	kg	Synthesis gas route	Methanol production from synthesis gas
25	1	Propylene oxide	Input	0.9034	kg	BAU
25	2
25	3	Water	Input	0.2165	kg	BAU
25	4	Electricity	Input	0.1229	kW	BAU
25	5	Heating demand	Input	11.231	MJ	BAU
25	6	Cooling demand	Input	12.64	MJ	BAU
25	7
25	8
25	9	Byproducts (DPG)	Output	0.1326	kg	BAU
25	10	Byproducts (TPG)	Output	0.0087	kg	BAU
25	11	Glycerol solution	Input	1.4238	kg	GB-1
25	12	Hydrogen	Input	0.0297	kg	GB-1
25	13	Water	Input	0.0093	kg	GB-1
25	14	Electricity	Input	0.0578	kW	GB-1
25	15	Heating demand	Input	4.635	MJ	GB-1
25	16	Cooling demand	Input	5.97	MJ	GB-1
25	17	Gas Purge	Output	0.0052	kg	GB-1
25	18	Wastewater	Output	0.4305	kg	GB-1
25	19	Byproducts (DPG)	Output	0.0111	kg	GB-1
25	20	Byproducts (TPG)	Output	0.0178	kg	GB-1
25	21	Glycerol solution	Input	13707	kg	GB-2
25	22	Hydrogen	Input	0.0321	kg	GB-2
25	23
25	24	Electricity	Input	0.0582	kW	GB-2
25	25	Heating demand	Input	4.819	MJ	GB-2
25	26	Cooling demand	Input	6.157	MJ	GB-2
25	27	Gas Purge	Output	0.0071	kg	GB-2
25	28	Wastewater	Output	0.3798	kg	GB-2
25	29	Byproducts (Me)	Output	0.008	kg	GB-2
25	30	Byproducts (EG)	Output	0.0146	kg	GB-2
25	31	Glycerol solution	Input	3.73	kg	GB-3
25	32	Water	Input	0.5687	kg	GB-3
25	33	Electricity	Input	0.1214	kW	GB-3
25	34	Heating demand	Input	16.707	MJ	GB-3
25	35	Cooling demand	Input	12.288	MJ	GB-3
25	36	Gas Purge	Output	2.7926	kg	GB-3
25	37	Wastewater	Output	0.3205	kg	GB-3
25	38	Byproducts DPG	Output	0.0325	kg	GB-3
25	39	Byproducts TPG	Output	0.1316	kg	GB-3
25	40	Byproducts EG	Output	0.0165	kg	GB-3
32	1	Air	Input	170	m³/h
32	2	Water loss makeup	Input	loss makeup <2	L/h
32	3	Carbon dioxide	Input	16	kg/h
32	4	Ethanol (azeotrope)	Input	23	kg/h
32	5	Ammonia	Input	18	kg/h
32	6	NaOH (solid)	Input	13	kg/h
32	7	Acetonitrile	Output	9	kg/h
32	8	Ammonium bicarbonate	Output	52	kg/h
32	9	Sodium cyanide	Output	3	kg/h
32	10	Sodium carbonate	Output	6	kg/h
32	11	Flue gases	Output	75	m³/h
32	12	Water drainage	Output	7	L/h
35	1	Crude glycerol	Input	1.5	kg	biocatalytic production of DHA from GLY
35	2	Process water	Input	10.2	kg	biocatalytic production of DHA from GLY
35	3	Nutrients	Input	0.05	kg	biocatalytic production of DHA from GLY
35	4	Air	Input	3.1	kg	biocatalytic production of DHA from GLY
35	5	Butanol	Input	0.06	kg	biocatalytic production of DHA from GLY
35	6	Steam (6 bar)	Input	44.7	MJ	biocatalytic production of DHA from GLY
35	7	Cooling water	Input	818	kg	biocatalytic production of DHA from GLY
35	8	Waste	Output	11	kg	biocatalytic production of DHA from GLY
35	11	DHA	Input	1.1	kg	Chemocatalytic production of LA from DHA in water
35	12	Process water	Input	6.5	kg	Chemocatalytic production of LA from DHA in water
35	13	Butanol	Input	0.02	kg	Chemocatalytic production of LA from DHA in water
35	14	Catalyst	Input	0.3	kg	Chemocatalytic production of LA from DHA in water
35	15	Steam (6 bar)	Input	18.2	MJ	Chemocatalytic production of LA from DHA in water
35	16	Cooling water	Input	434	kg	Chemocatalytic production of LA from DHA in water
35	17	Waste	Output	6.9	kg	Chemocatalytic production of LA from DHA in water
35	20	DHA	Input	1.09	kg/kg LA	Chemocatalytic production of LA from DHA in methanol
35	21	Process water	Input	0.41	kg/kg LA	Chemocatalytic production of LA from DHA in methanol
35	22	Methanol	Input	0.03	kg/kg LA	Chemocatalytic production of LA from DHA in methanol
35	23	Catalyst	Input	0.1	kg/kg LA	Chemocatalytic production of LA from DHA in methanol
35	24	Steam (6 bar)	Input	12.7	MJ/kg LA	Chemocatalytic production of LA from DHA in methanol
35	25	Cooling water	Input	649	kg/kg LA	Chemocatalytic production of LA from DHA in methanol
35	26	Waste	Output	0.59	kg/kg LA	Chemocatalytic production of LA from DHA in methanol
36	0	Sugarcane bagasse	Input	4.78	kg
36	1	Electricity	Input	0.78	MJ
36	2	Reduced bagasse	Input	4.78	kg
36	3	NaOH	Input	1.9	kg
36	4	Fresh water	Input	90.8	kg
36	5	Natural gas	Input	0.55	kg
36	6	Fresh water	Input	478	kg
36	7	Pretreated solid fraction	Input	12.68	kg
36	8	Solid fraction	Input	5.64	kg
36	9	Fresh water	Input	14.81	kg
36	10	H2SO4	Input	0.02	kg
36	11	Enzyme	Input	0.56	kg
36	12	Hydrolyzed liquid stream	Input	15.61	kg
36	13	Yeast extract	Input	0.15	kg
36	14	Inoculum	Input	1.57	L
36	15	CaCO3	Input	0.94	kg
36	16	H2SO4	Input	0.59	kg
36	17	Calcium lactate	Input	1.31	kg
36	18	Fermented broth	Input	16	kg
36	19	Reduced bagasse	Output	4.78	kg
36	20	Pretreated bagasse recovered as solid	Output	12.68	kg
36	21	Liquid fraction	Output	83.84	kg
36	22	CO2 emissions due to natural gas	Output	0.016	kg
36	23	Waste wash stream with lignin	Output	485.04	kg
36	24	Solid fraction	Output	5.64	kg
36	25	Hydrolyzed liquid stream	Output	15.61	kg
36	26	Hydrolyzed solid stream	Output	5.02	kg
36	27	Enzyme recovered	Output	0.42	kg
36	28	Enzyme emissions	Output	0.78	kg
36	29	Fermented broth	Output	16	kg
36	30	Calcium lactate in the broth	Output	1.31	kg
36	31	CO2 formed as a byproduct	Output	0.26	kg
36	32	Lactic acid	Output	1.08	kg
36	33	Water	Output	16	kg
36	34	Gypsum	Output	0.82	kg
38	1	Vine Shoots	Input	2466.4	kg/h	VS LA
38	2	H2SO4	Input	142.1	kg/h	VS LA
38	3	Lime	Input	159.4	kg/h	VS LA
38	4	Water	Input	4479.5	kg/h	VS LA
38	5	HP Steam	Input	316.8	kg/h	VS LA
38	6	Hydrolysate	Input	7035.5	kg/h	VS LA
38	7	Enzyme	Input	122.4	kg/h	VS LA
38	8	Saccharified stream	Input	7157.9	kg/h	VS LA
38	9
38	10	Yeast extract	Input	20.2	kg/h	VS LA
38	11	Nutrients	Input	40.4	kg/h	VS LA
38	12	Methanol	Input	7.4	kg/h	VS LA
38	13	Water	Input	131.5	kg/h	VS LA
38	14	Aqueous residues	Input	8467.5	kg/h	VS LA
38	15	Utilities plant	Input	145	kg/h	VS LA
38	16	Air	Input	4786.7	kg/h	VS LA
38	17
38	18	Biogas	Input	511.7	kg/h	VS LA
38	19	Sludge	Input	253.1	kg/h	VS LA
38	20	Vine Shoots	Input	1640.7	kg/h	VS LA
38	21	Solid residues	Input	903	kg/h	VS LA
38	22	Lime	Input	8.6	kg/h	VS LA
38	23	Water	Input	671.6	kg/h	VS LA
38	24	Air	Input	12843.5	kg/h	VS LA
38	25	Hydrolysate	Output	7035.5	kg/h	VS LA
38	26	Aqueous residues	Output	528.8	kg/h	VS LA
38	27	Saccharified stream	Output	7157.9	kg/h	VS LA
38	28	Solid residues	Output	903	kg/h	VS LA
38	29	Aqueous residues	Output	6589.4	kg/h	VS LA
38	30	Lactic Acid	Output	208.3	kg/h	VS LA
38	31	Biogas	Output	511.7	kg/h	VS LA
38	32	Sludge	Output	253.1	kg/h	VS LA
38	33	Brine	Output	294.7	kg/h	VS LA
38	34	Clean water	Output	7533.8	kg/h	VS LA
38	35	Losses	Output	4805.9	kg/h	VS LA
38	36	HP Steam	Output	316.8	kg/h	VS LA
38	37	Gypsum and ash	Output	505.6	kg/h	VS LA
38	38	Aqueous residues	Output	206.4	kg/h	VS LA
38	39	Emissions to air	Output	15803.3	kg/h	VS LA
38	40	Vine Shoots	Input	3267.2	kg/h	VS LF
38	41	H2SO4	Input	188	kg/h	VS LF
38	42	Water	Input	6983.6	kg/h	VS LF
38	43	HP Steam	Input	354.8	kg/h	VS LF
38	44	Air	Input	162.9	kg/h	VS LF
38	45
38	46	Hydrolysate	Input	4425.1	kg/h	VS LF
38	47	Enzyme	Input	161.4	kg/h	VS LF
38	48	Saccharified stream	Input	4586.5	kg/h	VS LF
38	49	Lactobacillus bacteria	Input	2.1	kg/h	VS LF
38	50	Nutrients	Input	14.6	kg/h	VS LF
38	51	Lime	Input	152.5	kg/h	VS LF
38	52	Methanol	Input	4.3	kg/h	VS LF
38	53	NaCl	Input	110.9	kg/h	VS LF
38	54	THF	Input	11.7	kg/h	VS LF
38	55	Aqueous residues	Input	11791	kg/h	VS LF
38	56	Utilities plant	Input	145	kg/h	VS LF
38	57	Air	Input	6923.7	kg/h	VS LF
38	58
38	59	Biogas	Input	621.1	kg/h	VS LF
38	60	Sludge	Input	479.9	kg/h	VS LF
38	61	Vine Shoots	Input	840	kg/h	VS LF
38	62	Solid residues	Input	840.8	kg/h	VS LF
38	63	Lime	Input	13.9	kg/h	VS LF
38	64	Water	Input	712.7	kg/h	VS LF
38	65	Air	Input	12184.6	kg/h	VS LF
38	66	Hydrolysate	Output	4425.1	kg/h	VS LF
38	67	Liquid fraction	Output	5730.9	kg/h	VS LF
38	68	Aqueous residues	Output	626.9	kg/h	VS LF
38	69	Air emissions	Output	173.6	kg/h	VS LF
38	70	Saccharified stream	Output	4586.5	kg/h	VS LF
38	71	Solid residues	Output	840.8	kg/h	VS LF
38	72	Aqueous residues	Output	4069.1	kg/h	VS LF
38	73	Lactic Acid	Output	209.3	kg/h	VS LF
38	74	Aqueous residues	Output	5783.4	kg/h	VS LF
38	75	Furfural	Output	70	kg/h	VS LF
38	76	Biogas	Output	621.1	kg/h	VS LF
38	77	Sludge	Output	479.9	kg/h	VS LF
38	78	Brine	Output	763.9	kg/h	VS LF
38	79	Clean water	Output	10045.2	kg/h	VS LF
38	80	Losses	Output	6949.7	kg/h	VS LF
38	81	HP Steam	Output	354.8	kg/h	VS LF
38	82	Gypsum and ash	Output	315.3	kg/h	VS LF
38	83	Aqueous residues	Output	194.8	kg/h	VS LF
38	84	Emissions to air	Output	14828.1	kg/h	VS LF
39	1	NG	Input	1.2	MJ	Biogas production	Biogas production
39	2	Electricity	Input	0.039	kWh	Biogas production	Biogas production
39	3	Corn steep liquor	Input	11	g	Biogas production	Biogas production
39	4	Diammonium phosphate	Input	1.6	g	Biogas production	Biogas production
39	5	Corn oil	Input	0.1	g	Biogas production	Biogas production
39	6	Sorbitol	Input	0.7	g	Biogas production	Biogas production
39	7	Glucose	Input	3.3	g	Biogas production	Biogas production
39	8	Process makeup water	Input	0.017	L	Biogas production	Biogas production
39	9	Biogas	Output	8.7	MJ	Biogas production	Biogas production
39	10	CO2	Output	0.35	kg	Biogas production	Biogas production
39	11	Digestate wet	Output	1.9	kg	Biogas production	Biogas production
39	12	NG	Input	1.3	MJ	Biogas production	LA production
39	13	Electricity	Input	0.39	kWh	Biogas production	LA production
39	14	Corn steep liquor	Input	22	g	Biogas production	LA production
39	15	Diammonium phosphate	Input	3.3	g	Biogas production	LA production
39	16	Corn oil	Input	0.14	g	Biogas production	LA production
39	17	Sorbitol	Input	1.5	g	Biogas production	LA production
39	18	Glucose	Input	6.9	g	Biogas production	LA production
39	19	Process makeup water	Input	0.7	L	Biogas production	LA production
39	20	Lactic acid	Output	0.36	kg	Biogas production	LA production
39	21	CO2	Output	0.15	kg	Biogas production	LA production
39	22	Digestate wet	Output	0.51	kg	Biogas production	LA production
47	1	Total	Input	3.8	t
47	2	Ethanol (93 wt%)	Input	3.22	t
47	3	Octane	Input	0.003	t
47	4	Water	Input	0.575	t
47	5	DMF	Input	0.001	t
47	6	Total	Output	3.8	t
47	7	1,3-BD	Output	1	t
47	8	Butenes	Output	0.097	t
47	9	Ethylene	Output	0.155	t
47	10	Propylene	Output	0.054	t
47	11	Acetaldehyde	Output	0.127	t
47	12	Hydrogen	Output	0.047	t
47	13	Residual fuel streams	Output	0.46	t
47	14	Wastewater	Output	1.861	t
49	1	Biomass (DM)	Input	65	t/h	Biomass to EtOH
49	2	Coal	Input	35	t/h	Biomass to EtOH
49	3	Heating	Input	69.1	MW	Biomass to EtOH
49	4	Cooling	Input	50.6	MW	Biomass to EtOH
49	5	Power	Input	2	MW	Biomass to EtOH
49	6	EtOH	Output	14202	lit/h	Biomass to EtOH
49	7	Power	Output	7.1	MW	Biomass to EtOH
49	8
49	9	Biomass (DM)	Input	65	t/h	Biomass to BD
49	10	Heating	Input	86.7	MW	Biomass to BD
49	11	Cooling	Input	72.4	MW	Biomass to BD
49	12	Power	Input	3.1	MW	Biomass to BD
49	13	BD	Output	4.6	t/h	Biomass to BD
49	14	Power	Output	3.8	MW	Biomass to BD
49	15	Biomass (DM)	Input	65	t/h	Biomass to EtOH, coal burning
49	16	Coal	Input	12.7	t/h	Biomass to EtOH, coal burning
49	17	Heating	Input	99.3	MW	Biomass to EtOH, coal burning
49	18	Cooling	Input	79.2	MW	Biomass to EtOH, coal burning
49	19	Power	Input	3	MW	Biomass to EtOH, coal burning
49	20	EtOH	Output	21820	lit/h	Biomass to EtOH, coal burning
49	21	Power	Output	10.5	MW	Biomass to EtOH, coal burning
49	22	Biomass (DM)	Input	65	t/h	Biomass to BD, coal burning
49	23	Coal	Input	6.6	t/h	Biomass to BD, coal burning
49	24	Heating	Input	106	MW	Biomass to BD, coal burning
49	25	Cooling	Input	90	MW	Biomass to BD, coal burning
49	26	Power	Input	3.8	MW	Biomass to BD, coal burning
49	27	BD	Output	5.7	t/h	Biomass to BD, coal burning
49	28	Power	Output	6.7	MW	Biomass to BD, coal burning
58	1	Biomass (dried)	Input	10.04	ton	Two Stage Dilute Acid Hydrolysis
58	2	H2SO4	Input	0.32	ton	Two Stage Dilute Acid Hydrolysis
58	3	Water	Input	38.82	ton	Two Stage Dilute Acid Hydrolysis
58	4	Lime	Input	0.51	ton	Two Stage Dilute Acid Hydrolysis
58	5	Air	Input	35.15	ton	Two Stage Dilute Acid Hydrolysis
58	6	Electricity	Input	0.41	GJ	Two Stage Dilute Acid Hydrolysis
58	7	Prehydrolysate (dried)	Output	3.94	ton	Two Stage Dilute Acid Hydrolysis
58	8	Prehydrolysate (water)	Output	18.29	ton	Two Stage Dilute Acid Hydrolysis
58	9	Glucose (dried)	Output	2.77	ton	Two Stage Dilute Acid Hydrolysis
58	10	Glucose (water)	Output	19.11	ton	Two Stage Dilute Acid Hydrolysis
58	11	Heat	Output	-109.97	GJ	Two Stage Dilute Acid Hydrolysis
58	12	Water	Output	3.42	ton	Two Stage Dilute Acid Hydrolysis
58	13	Glucose	Output	0.12	ton	Two Stage Dilute Acid Hydrolysis
58	14	CO2	Output	7.39	ton	Two Stage Dilute Acid Hydrolysis
58	15	CaSO4	Output	0.38	ton	Two Stage Dilute Acid Hydrolysis
58	16	Na2CO3	Output	0.32	ton	Two Stage Dilute Acid Hydrolysis
58	17	N2	Output	26.67	ton	Two Stage Dilute Acid Hydrolysis
58	18	O2	Output	2.45	ton	Two Stage Dilute Acid Hydrolysis
58	19	Starch	Input	2.77	ton	pX Production from Starch
58	20	HCl	Input	0.062	ton	pX Production from Starch
58	21	NaCl	Input	0.55	ton	pX Production from Starch
58	22	THF	Input	0.11	ton	pX Production from Starch
58	23	H2	Input	0.079	ton	pX Production from Starch
58	24	Ethylene	Input	0.32	ton	pX Production from Starch
58	25	Heptane	Input	0.03	ton	pX Production from Starch
58	26	Cooling water	Input	-73.84	GJ	pX Production from Starch
58	27	Steam, natural gas	Input	68.11	GJ	pX Production from Starch
58	28	Electricity	Input	0.94	GJ	pX Production from Starch
58	29	PX	Output	1	ton	pX Production from Starch
58	30	BYPROD1	Output	0.46	ton	pX Production from Starch
58	31	BYPROD2	Output	0.15	ton	pX Production from Starch
58	32	Humins	Output	0.18	ton	pX Production from Starch
58	33	Waste water	Output	1.283	ton	pX Production from Starch
58	34	NaCl	Output	0.55	ton	pX Production from Starch
58	35	HCl	Output	0.062	ton	pX Production from Starch
58	36	THF	Output	0.11	ton	pX Production from Starch
58	37	CO2	Output	0.062	ton	pX Production from Starch
58	38	Formic acid	Output	0.032	ton	pX Production from Starch
58	39	Heptane	Output	0.03	ton	pX Production from Starch
59	1	CO2	Input	1441	kg	Methanol
59	2	H2	Input	203	kg	Methanol
59	3	Electricity	Input	1188000	kJ	Methanol
59	4	Infrastructure	Input	2.35e-07	units	Methanol
59	5	Al2O3	Input	0.183	kg	Methanol
59	6	CuO	Input	1.172	kg	Methanol
59	7	MgO	Input	0.037	kg	Methanol
59	8	ZnO	Input	0.439	kg	Methanol
59	9	Methanol	Output	1000	kg	Methanol
59	10	Water	Output	578	kg	Methanol
59	11	CO2	Output	66	kg	Methanol
59	12	Heat	Output	1400000	kJ	Methanol
59	13	Methanol	Input	5437	kg	Olefins (MTO)
59	14	Electricity	Input	5436735	kJ	Olefins (MTO)
59	15	Infrastructure	Input	6.21e-07	units	Olefins (MTO)
59	16	Zeolite	Input	1.396	kg	Olefins (MTO)
59	17	CO2	Output	145	kg	Olefins (MTO)
59	18	Water	Output	3033	kg	Olefins (MTO)
59	19	Heat	Output	4461384	kJ	Olefins (MTO)
59	20	Ethylene	Output	1000	kg	Olefins (MTO)
59	21	Propylene	Output	800	kg	Olefins (MTO)
59	22	Butene	Output	230	kg	Olefins (MTO)
59	23	Aliphatics	Output	230	kg	Olefins (MTO)
59	24	Methanol	Input	130989	kg	Aromatics (MTA)
59	25	Electricity	Input	24091590	kJ	Aromatics (MTA)
59	26	Infrastructure	Input	1.5e-05	units	Aromatics (MTA)
59	27	Zeolite	Input	33.645	kg	Aromatics (MTA)
59	28	CO2	Output	1500	kg	Aromatics (MTA)
59	29	Water	Output	73787	kg	Aromatics (MTA)
59	30	Heat	Output	182911300	kJ	Aromatics (MTA)
59	31	Benzene	Output	1000	kg	Aromatics (MTA)
59	32	Aliphatics C5+	Output	6418	kg	Aromatics (MTA)
59	33	Ethylbenzene	Output	463	kg	Aromatics (MTA)
59	34	Ethyltoluene	Output	1171	kg	Aromatics (MTA)
59	35	Isopropylbenzene	Output	49	kg	Aromatics (MTA)
59	36	Olefines C2-C4	Output	25674	kg	Aromatics (MTA)
59	37	Tetramethylbenzene	Output	1049	kg	Aromatics (MTA)
59	38	Trimethylbenzene	Output	3439	kg	Aromatics (MTA)
59	39	m-Xylene	Output	5561	kg	Aromatics (MTA)
59	40	o-Xylene	Output	2195	kg	Aromatics (MTA)
59	41	p-Xylene	Output	2439	kg	Aromatics (MTA)
59	42	Toluene	Output	6244	kg	Aromatics (MTA)
59	43	MTA Production Mix	Input	55702	kg	BTX Separation
59	44	Electricity	Input	79506982	kJ	BTX Separation
59	45	Process Water	Input	14482	kg	BTX Separation
59	46	Other	Input	37800	kg	BTX Separation
59	47	Benzene	Output	1000	kg	BTX Separation
59	48	Toluene	Output	6244	kg	BTX Separation
59	49	Xylenes	Output	10658	kg	BTX Separation
59	50	Other	Output	37800	kg	BTX Separation
60	1	Cotton straw	Input	2500	kg/h	biorefinery process	Sub 1
60	2	Fertilizer	Input	61	kg/h	biorefinery process	Sub 1
60	3	Air	Input	3697	kg/h	biorefinery process	Sub 1
60	4	Sulfuric acid (98 wt%)	Input	77	kg/h	biorefinery process	Sub 1
60	5	Process water	Input	1323	kg/h	biorefinery process	Sub 1
60	6	Diesel for Feedstock collection	Input	550	MJ/h	biorefinery process	Sub 1
60	7	Electricity	Input	2889	MJ/h	biorefinery process	Sub 1
60	8	Cooling water from river (20 °C)	Input	1344	m3 h−1	biorefinery process	Sub 1
60	9	CO2 (biogenic)	Output	1542	kg/h	biorefinery process	Sub 1
60	10	N2	Output	2847	kg/h	biorefinery process	Sub 1
60	11	Steam	Output	315	kg/h	biorefinery process	Sub 1
60	12	Ash	Output	143	kg/h	biorefinery process	Sub 1
60	13	Process water	Input	1527	kg h	biorefinery process	Sub 2
60	14	Activated carbon	Input	3	kg h	biorefinery process	Sub 2
60	15	Calcium hydroxide	Input	340	kg h	biorefinery process	Sub 2
60	16	Hydrochloric acid (32 wt%)	Input	3	kg h	biorefinery process	Sub 2
60	17	Ethyl acetate	Input	20	kg h	biorefinery process	Sub 2
60	18	Electricity	Input	598	MJ h	biorefinery process	Sub 2
60	19	Steam (6 bar)	Input	861	MJ h	biorefinery process	Sub 2
60	20	Cooling water from river (20 Â°C)	Input	4.3	mÂ³ h	biorefinery process	Sub 2
60	21	Waste liquid	Output	2795	kg h	biorefinery process	Sub 2
60	22	Solid waste	Output	429	kg h	biorefinery process	Sub 2
60	23	Levoglucosan	Output	369	kg h	biorefinery process	Sub 2
60	24	Process water	Input	59	kg h[-]	biorefinery process	Sub 3
60	25	Sodium hydroxide	Input	35	kg h[-]	biorefinery process	Sub 3
60	26	Phenol	Input	172	kg h[-]	biorefinery process	Sub 3
60	27	Formaldehyde (37 wt%)	Input	604	kg h[-]	biorefinery process	Sub 3
60	28	Electricity	Input	72	MJ h[-]	biorefinery process	Sub 3
60	29	Steam (6 bar)	Input	132	MJ h[-]	biorefinery process	Sub 3
60	30	Renewable phenol resin	Output	1045	kg h[-]	biorefinery process	Sub 3
60	31
60	32	Calcium oxide	Input	24	kg h	biorefinery process	Sub 4
60	33	Methanol	Input	142	kg h	biorefinery process	Sub 4
60	34	Electricity	Input	367	MJ h	biorefinery process	Sub 4
60	35	Steam (6 bar)	Input	2850	MJ h	biorefinery process	Sub 4
60	36	Cooling water from river (20 Â°C)	Input	34	mÂ³ h	biorefinery process	Sub 4
60	37	Waste liquid	Output	740	kg h	biorefinery process	Sub 4
60	38	Solid waste	Output	264	kg h	biorefinery process	Sub 4
60	39	Deicer	Output	37	kg h	biorefinery process	Sub 4
63	1	Biomass	Input	6.74	kg	Biomass-Derived FDCA
63	2	THF	Input	0.06	kg	Biomass-Derived FDCA
63	3	H2SO4	Input	0.21	kg	Biomass-Derived FDCA
63	4	Heavy oil	Input	0.03	kg	Biomass-Derived FDCA
63	5	Ca(OH)2	Input	0.07	kg	Biomass-Derived FDCA
63	6	NaCl	Input	0.05	kg	Biomass-Derived FDCA
63	7	H2	Input	0.07	kg	Biomass-Derived FDCA
63	8	O2	Input	1.43	kg	Biomass-Derived FDCA
63	9	Heat (MJ); natural gas	Input	1.42	MJ	Biomass-Derived FDCA
63	10	Electricity (MJ); natural gas	Input	7.02	MJ	Biomass-Derived FDCA
63	11	FDCA	Output	1	kg	Biomass-Derived FDCA
63	12	1,5-PDO	Output	0.65	kg	Biomass-Derived FDCA
63	13	Activated carbon	Output	0.63	kg	Biomass-Derived FDCA
63	14	Ash	Output	0.68	kg	Biomass-Derived FDCA
63	15	CO2	Output	1.52	kg	Biomass-Derived FDCA
63	16	Gypsum	Output	0.17	kg	Biomass-Derived FDCA
63	17	Coke	Output	0.06	kg	Biomass-Derived FDCA
63	18	H2O	Output	0.001	m³	Biomass-Derived FDCA
63	19
63	20
63	21
63	22	H2O	Input	0.00034	m³	Biomass-Derived TPA
63	23	AA	Input	0.05	kg	Biomass-Derived TPA
63	24	chemical factory (p)	Input	4.0 × 10−10	p	Biomass-Derived TPA
63	25	Electricity	Input	0.47	kWh	Biomass-Derived TPA
63	26	Heat (natural gas)	Input	0.46	MJ	Biomass-Derived TPA
63	27	Heat (other than natural gas)	Input	1.2	MJ	Biomass-Derived TPA
63	28	N2	Input	0.049	kg	Biomass-Derived TPA
63	29	NaOH	Input	0.0015	kg	Biomass-Derived TPA
63	30	steam	Input	0.64	kg	Biomass-Derived TPA
63	31	H2O	Input	0.43	kg	Biomass-Derived TPA
63	32	xylene	Input	0.66	kg	Biomass-Derived TPA
63	33	TPA	Output	1	kg	Biomass-Derived TPA
63	34	Hydrocarbons	Output	0.00038	kg	Biomass-Derived TPA
63	35	NMVOC	Output	0.00011	kg	Biomass-Derived TPA
63	36	Particulates (<2.5 μm)	Output	2e-05	kg	Biomass-Derived TPA
63	37	Particulates (>10 μm)	Output	3e-05	kg	Biomass-Derived TPA
63	38	Particulates (>2.5 μm, <10 μm)	Output	4e-05	kg	Biomass-Derived TPA
63	39	H2O	Output	0.00022	m³	Biomass-Derived TPA
63	40	Incineration residue	Output	0.006	kg	Biomass-Derived TPA
63	41	hazardous waste	Output	0.0002	kg	Biomass-Derived TPA

## Sheet: LCI (LLM-generation)
ID	Row number	Flow name	Input/Output	Amount	Unit	Pathway	Activity
1	1	Raw coal	Input	133.4	t	CTM	Coal mining/Straw production and processing
1	2	Fuel coal	Input	9004.56	kg	CTM	Coal mining/Straw production and processing
1	3	Natural gas	Input	86.34	m	CTM	Coal mining/Straw production and processing				Note: The blank space indicates missing data that are shown in the ground truth (to align with the row number of LCI_ground_truth)
1	4	Diesel	Input	72.08	kg	CTM	Coal mining/Straw production and processing
1	5	Gasoline	Input	66.54	kWh	CTM	Coal mining/Straw production and processing
1	6	Electricity	Input	8533.29	kWh	CTM	Coal mining/Straw production and processing
1	7	Coal	Output	120.5	t	CTM	Coal mining/Straw production and processing
1	8	CO2	Output	12.9	t	CTM	Coal mining/Straw production and processing
1	9	Highway	Input	100	km	CTM	Transportation
1	10	Railway	Input	500	km	CTM	Transportation
1	11	Coal	Output	120.5	t	CTM	Transportation
1	12	Electricity	Input	3583.46	kWh	CTM	Pretreatment
1	13	Fuel gas	Input	22495.6	MJ	CTM	Pretreatment
1	14	Steam	Input	549.86	MJ	CTM	Pretreatment
1	15	Coal	Output	120.4	t	CTM	Pretreatment
1	16	Ash	Output	321.59	kg	CTM	Pretreatment
1	17	O2	Input	105.8	t	CTM	Gasification
1	18	Electricity	Input	3237.14	kWh	CTM	Gasification
1	19	Steam	Input	189.01	t	CTM	Gasification
1	20	Crude syngas	Output	431.06	t	CTM	Gasification
1	21	Ash	Output	12.24	t	CTM	Gasification
1	22	Tar	Output	1.33	t	CTM	Gasification
1	23	N2	Input	45.36	t	CTM	WGS + AGR
1	24	Electricity	Input	716.62	kWh	CTM	WGS + AGR
1	25	Steam	Input	231463	MJ	CTM	WGS + AGR
1	26	Syngas	Output	93.13	t	CTM	WGS + AGR
1	27	H2S	Output	729.17	kg	CTM	WGS + AGR
1	28	CO2	Output	169.12	t	CTM	WGS + AGR
1	29	Electricity	Input	782.79	kWh	CTM	Methanol synthesis and purification
1	30	Steam	Input	430773	MJ	CTM	Methanol synthesis and purification
1	31	Methanol	Output	78.98	t	CTM	Methanol synthesis and purification
1	32	CO2	Output	296.13	kg	CTM	Methanol synthesis and purification
1	33	CO	Output	45.64	kg	CTM	Methanol synthesis and purification
1	34	VOC	Output	534.04	kg	CTM	Methanol synthesis and purification
1	35	Waste water	Output	5004	kg	CTM	Methanol synthesis and purification
1	36	CO2	Output	44.64	t	BTM	Straw production and processing
1	37	Diesel	Input	563.42	kg	BTM	Straw production and processing
1	38	Gasoline	Input	250.4	kg	BTM	Straw production and processing
1	39	Electricity	Input	31.3	kWh	BTM	Straw production and processing
1	40	Fertilizer	Input	1.76	t	BTM	Straw production and processing
1	41	Land	Input	82871	m	BTM	Straw production and processing
1	42	Straw	Input	137.6	t	BTM	Straw production and processing
1	43	Highway	Input	100	km	BTM	Transportation
1	44	Railway	Input	500	km	BTM	Transportation
1	45	Straw	Output	137.6	t	BTM	Transportation
1	46	Electricity	Input	5276.59	kWh	BTM	Pretreatment
1	47	Straw	Output	137.6	t	BTM	Pretreatment
1	48	Ash	Output	162.77	kg	BTM	Pretreatment
1	49	O2	Input	96.05	t	BTM	Gasification
1	50	Electricity	Input	6777.95	kWh	BTM	Gasification
1	51	Steam	Input	132.13	t	BTM	Gasification
1	52	Crude syngas	Output	417.63	t	BTM	Gasification
1	53	Ash	Output	3.7	t	BTM	Gasification
1	54	Tar	Output	1.33	t	BTM	Gasification
1	55	N2	Input	24.21	t	BTM	WGS + AGR
1	56	Electricity	Input	386.97	kWh	BTM	WGS + AGR
1	57	Steam	Input	134249	MJ	BTM	WGS + AGR
1	58	Syngas	Output	101.8	t	BTM	WGS + AGR
1	59	H2S	Output	52.88	kg	BTM	WGS + AGR
1	60	CO2	Output	92.24	t	BTM	WGS + AGR
1	61	Electricity	Input	782.79	kWh	BTM	Methanol synthesis and purification
1	62	Steam	Input	436053	MJ	BTM	Methanol synthesis and purification
1	63	Methanol	Output	79.08	t	BTM	Methanol synthesis and purification
1	64	CH4	Output	9425.96	kg	BTM	Methanol synthesis and purification
1	65	CO2	Output	262.68	kg	BTM	Methanol synthesis and purification
1	66	CO	Output	49	kg	BTM	Methanol synthesis and purification
1	67	VOC	Output	780.36	kg	BTM	Methanol synthesis and purification
1	68	Waste water	Output	5210	kg	BTM	Methanol synthesis and purification
2	1	CO2 absorbed	Input	4.22	kg	Methanol production	Sugarcane cultivation, harvesting and transportation
2	2	Ammonium sulfate, as N	Input	9.4	kg	Methanol production	Sugarcane cultivation, harvesting and transportation
2	3	Urea, as N	Input	2.8	kg	Methanol production	Sugarcane cultivation, harvesting and transportation
2	4	Ammonium nitrate phosphate, as N	Input	9.4	kg	Methanol production	Sugarcane cultivation, harvesting and transportation
2	5	Diammonium phosphate, as N	Input	1.1	kg	Methanol production	Sugarcane cultivation, harvesting and transportation
2	6	Potassium nitrate, as N	Input	5.9	kg	Methanol production	Sugarcane cultivation, harvesting and transportation
2	7	Diammonium phosphate, as P2O5	Input	2.4	kg	Methanol production	Sugarcane cultivation, harvesting and transportation
2	8	Superphosphate, as P2O5	Input	1.6	kg	Methanol production	Sugarcane cultivation, harvesting and transportation
2	9	Triple superphosphate, as P2O5	Input	8.7	kg	Methanol production	Sugarcane cultivation, harvesting and transportation
2	10	Phosphate, as P2O5	Input	2.7	kg	Methanol production	Sugarcane cultivation, harvesting and transportation
2	11	Potassium chloride, as K2O	Input	1.1	kg	Methanol production	Sugarcane cultivation, harvesting and transportation
2	12	Potassium sulfate, as K2O	Input	1.2	kg	Methanol production	Sugarcane cultivation, harvesting and transportation
2	13	Potassium nitrate, as K2O	Input	1.2	kg	Methanol production	Sugarcane cultivation, harvesting and transportation
2	14	Vinasse from sugarcane	Input	10.6	kg	Methanol production	Sugarcane cultivation, harvesting and transportation
2	15	Lime	Input	3.7	kg	Methanol production	Sugarcane cultivation, harvesting and transportation
2	16	Diesel	Input	1.5	l	Methanol production	Sugarcane cultivation, harvesting and transportation
2	17	Land use	Input	1.049	m	Methanol production	Sugarcane cultivation, harvesting and transportation
2	18	Transport, tractor	Input	2.8	t km	Methanol production	Sugarcane cultivation, harvesting and transportation
2	19	Water	Input	3.7	mÂ³	Methanol production	Sugarcane milling
2	20	Steam	Input	1.76	kg	Methanol production	Sugarcane milling
2	21	Sugarcane	Input	7.04	kg	Methanol production	Sugarcane milling
2	22	Electricity	Input	1.1	kWh	Methanol production	Pre-treatment
2	23	Bagasse	Input	2	kg	Methanol production	Pre-treatment
2	24	Electricity	Input	1.43	kWh	Methanol production	Gasification
2	25	Oxygen	Input	5.5	kg	Methanol production	Gasification
2	26	Steam	Input	1.79	kg	Methanol production	Gasification
2	27	Electricity	Input	9.3	kWh	Methanol production	Syngas conditioning and methanol synthesis
2	28	Steam (conditions: 165 °C and 0.68 MPa)	Input	1.73	kg	Methanol production	Syngas conditioning and methanol synthesis
2	29	Syngas	Input	4.2	kg	Methanol production	Syngas conditioning and methanol synthesis
2	30	CO2	Output	6.58	g	Not mentioned	Sugarcane cultivation, harvesting and transportation
2	31	NOx	Output	5.4	g	Not mentioned	Sugarcane cultivation, harvesting and transportation
2	32	CO	Output	1.24	g	Not mentioned	Sugarcane cultivation, harvesting and transportation
2	33	Fine particles	Output	1.3	g	Not mentioned	Sugarcane cultivation, harvesting and transportation
2	34	Organic carbon	Output	2.5	g	Not mentioned	Sugarcane cultivation, harvesting and transportation
2	35	Nitrate	Output	2.8	mg	Not mentioned	Sugarcane cultivation, harvesting and transportation
2	36	Silicon	Output	8.4	mg	Not mentioned	Sugarcane cultivation, harvesting and transportation
2	37	Ammonium	Output	9.2	mg	Not mentioned	Sugarcane cultivation, harvesting and transportation
2	38	Sulfate	Output	1.3	mg	Not mentioned	Sugarcane cultivation, harvesting and transportation
2	39	Alkanes	Output	1.1	g	Not mentioned	Sugarcane cultivation, harvesting and transportation
2	40	Olefins	Output	1.2	mg	Not mentioned	Sugarcane cultivation, harvesting and transportation
2	41	Aromatics	Output	9.8	mg	Not mentioned	Sugarcane cultivation, harvesting and transportation
2	42	Formaldehyde	Output	1.5	g	Not mentioned	Sugarcane cultivation, harvesting and transportation
2	43	Acetaldehyde	Output	2.9	g	Not mentioned	Sugarcane cultivation, harvesting and transportation
2	44	Propanal	Output	9.8	g	Not mentioned	Sugarcane cultivation, harvesting and transportation
2	45	Acetone	Output	1.5	g	Not mentioned	Sugarcane cultivation, harvesting and transportation
2	46	Aromatic acids	Output	1.4	mg	Not mentioned	Sugarcane cultivation, harvesting and transportation
2	47	CO2 (Tractor emissions)	Output	30	g	Not mentioned	Sugarcane cultivation, harvesting and transportation
2	48	HC	Output	9.9	g	Not mentioned	Sugarcane cultivation, harvesting and transportation
2	49	CO (Tractor emissions)	Output	2.7	g	Not mentioned	Sugarcane cultivation, harvesting and transportation
2	50	NOx (Tractor emissions)	Output	6.8	g	Not mentioned	Sugarcane cultivation, harvesting and transportation
2	51	SOx (Tractor emissions)	Output	4.8	g	Not mentioned	Sugarcane cultivation, harvesting and transportation
2	52	PM10 (Tractor emissions)	Output	7.2	g	Not mentioned	Sugarcane cultivation, harvesting and transportation
2	53	N2O from denitrification	Output	1.37	g	Not mentioned	Sugarcane cultivation, harvesting and transportation
2	54	N2 from denitrification	Output	2.28	g	Not mentioned	Sugarcane cultivation, harvesting and transportation
2	55	NH3 from volatilization	Output	3.6	g	Not mentioned	Sugarcane cultivation, harvesting and transportation
2	56	N2O (pre-harvest burning)	Output	4	g	Not mentioned	Sugarcane cultivation, harvesting and transportation
2	57	NOx (pre-harvest burning)	Output	2.51	g	Not mentioned	Sugarcane cultivation, harvesting and transportation
2	58	CH4 (pre-harvest burning)	Output	6.8	g	Not mentioned	Sugarcane cultivation, harvesting and transportation
2	59	SOx (pre-harvest burning)	Output	3.1	g	Not mentioned	Sugarcane cultivation, harvesting and transportation
2	60	NMVOC	Output	1.54	g	Not mentioned	Sugarcane cultivation, harvesting and transportation
2	61	Phosphorous	Output	2.8	g	Not mentioned	Sugarcane cultivation, harvesting and transportation
2	62	Nitrate (to water)	Output	1.48	g	Not mentioned	Sugarcane cultivation, harvesting and transportation
2	63	Ash	Output	40.7	g	Not mentioned	Gasification
2	64	Tar	Output	16.8	g	Not mentioned	Gasification
2	65	Particulates	Output	4.18	g	Not mentioned	Gasification
2	66	Alkalis	Output	6.5	g	Not mentioned	Gasification
2	67	SOx	Output	5	PPM	Not mentioned	Gasification
2	68	NOx	Output	58	PPM	Not mentioned	Gasification
2	69	TOC	Output	400	PPM	Not mentioned	Gasification
2	70	Residual gas	Output	90	g	Not mentioned	Syngas conditioning and methanol synthesis
2	71	CO	Output	1.12	g	Not mentioned	Syngas conditioning and methanol synthesis
2	72	CH3OH (VOC)	Output	6.49	g	Not mentioned	Syngas conditioning and methanol synthesis
2	73	Others VOC	Output	2.48	g	Not mentioned	Syngas conditioning and methanol synthesis
2	74	CH4	Output	2.34	g	Not mentioned	Syngas conditioning and methanol synthesis
2	75	CO2	Output	1830	g	Not mentioned	Syngas conditioning and methanol synthesis
2	76	NOx	Output	9.28	g	Not mentioned	Syngas conditioning and methanol synthesis
2	77	PM10	Output	9.3	g	Not mentioned	Syngas conditioning and methanol synthesis
2	78	SO2	Output	5.24	g	Not mentioned	Syngas conditioning and methanol synthesis
2	79	Slag	Output	410	g	Not mentioned	Syngas conditioning and methanol synthesis
6	1	N fertiliser (NH4NO3)	Input	0.2849	t	Catalytic HTG	Chemicals production
6	2	Energy for N fertiliser production	Input	4.778	MWh	Catalytic HTG	Chemicals production
6	3	P fertiliser (ammonium nitrate phosphate)	Input	0.0607	t	Catalytic HTG	Chemicals production
6	4	Energy for P fertiliser production	Input	0.3194	MWh	Catalytic HTG	Chemicals production
6	5	NaOH catalyst	Input	0.5517	t	Catalytic HTG	Chemicals production
6	6	Energy for NaOH catalyst production	Input	1.297	MWh	Catalytic HTG	Chemicals production
6	7	Aluminium sulfate flocculant	Input	0.07259	t	Catalytic HTG	Chemicals production
6	8	Energy for aluminium sulfate production	Input	0.2642	MWh	Catalytic HTG	Chemicals production
6	9	CO2 uptake	Input	2.188	t	Catalytic HTG	Biofixation of CO2
6	10	Microalgae feedstock	Input	1.452	t	Catalytic HTG	Biofixation of CO2
6	11	Paddlewheels	Input	3.3	MWh	Catalytic HTG	Biofixation of CO2
6	12	Lamella clarifier and centrifuge	Input	0.03208	MWh	Catalytic HTG	Biofixation of CO2
6	13	Transportation of feedstock	Input	145.2	tkm	Catalytic HTG	Biofixation of CO2
6	14	Produced Fuel gas	Input	1.018	t	Catalytic HTG	Hydrothermal Conversion
6	15	Energy need of HTG	Input	13.22	MWh	Catalytic HTG	Hydrothermal Conversion
6	16	The required amount of CO2	Input	0.064	t	Catalytic HTG	Fuel gas reforming
6	17	Required amount of O2	Input	0.04643	t	Catalytic HTG	Fuel gas reforming
6	18	Required amount of steam	Input	93.68	t	Catalytic HTG	Fuel gas reforming
6	19	Required energy	Input	4.613	MWh	Catalytic HTG	Fuel gas reforming
6	20	Mass of required H2	Input	0.0363	t	Catalytic HTG	Water electrolysis
6	21	The energy need of water electrolysis	Input	2.053	MWh	Catalytic HTG	Water electrolysis
6	22	Required energy	Input	4.374	MWh	Catalytic HTG	Methanol synthesis
6	23	N fertiliser (NH4NO3)	Input	0.3108	t	Non-catalytic HTG	Chemicals production
6	24	Energy for N fertiliser production	Input	5.194	MWh	Non-catalytic HTG	Chemicals production
6	25	P fertiliser (ammonium nitrate phosphate)	Input	0.0699	t	Non-catalytic HTG	Chemicals production
6	26	Energy for P fertiliser production	Input	0.3694	MWh	Non-catalytic HTG	Chemicals production
6	27	Aluminium sulfate flocculant	Input	0.07921	t	Non-catalytic HTG	Chemicals production
6	28	Energy for aluminium sulfate production	Input	0.2889	MWh	Non-catalytic HTG	Chemicals production
6	29	CO2 uptake	Input	2.387	t	Non-catalytic HTG	Biofixation of CO2
6	30	Microalgae feedstock	Input	1.584	t	Non-catalytic HTG	Biofixation of CO2
6	31	Paddlewheels	Input	3.6	MWh	Non-catalytic HTG	Biofixation of CO2
6	32	Lamella clarifier and centrifuge	Input	0.03499	MWh	Non-catalytic HTG	Biofixation of CO2
6	33	Transportation of feedstock	Input	0.1584	tkm	Non-catalytic HTG	Biofixation of CO2
6	34	Produced Fuel gas	Input	0.9951	t	Non-catalytic HTG	Hydrothermal Conversion
6	35	Energy need of HTG	Input	15.14	MWh	Non-catalytic HTG	Hydrothermal Conversion
6	36	The required amount of CO2	Input	0.074	t	Non-catalytic HTG	Fuel gas reforming
6	37	Required amount of O2	Input	0.05066	t	Non-catalytic HTG	Fuel gas reforming
6	38	Required amount of steam	Input	126.1	t	Non-catalytic HTG	Fuel gas reforming
6	39	Required energy	Input	5.685	MWh	Non-catalytic HTG	Fuel gas reforming
6	40	Mass of required H2	Input	0.0412	t	Non-catalytic HTG	Methanol synthesis
6	41	The energy need of water electrolysis	Input	2.331	MWh	Non-catalytic HTG	Methanol synthesis
6	42	Required energy for methanol synthesis	Input	4.073	MWh	Non-catalytic HTG	Methanol synthesis
9	1	Feedstock (bone dry)	Input	1.9	t	EAX OC
9	2	Enzymes	Input	16	kg	EAX OC
9	3	Sulfuric Acid	Input	34	kg	EAX OC
9	4	Ammonia	Input	23	kg	EAX OC
9	5	Sodium hydroxide	Input	45	kg	EAX OC
9	6	Clarifier polymer	Input	1.1	kg	EAX OC
9	7	Fermentation nutrients	Input	50	kg	EAX OC
9	8	Lime	Input	26	kg	EAX OC
9	9	Natural gas	Input	53	GJ	EAX OC
9	10	Ethyl acetate	Input	5.2	kg	EAX OC
9	11	Electricity	Input	0	kWh	EAX OC
9	12	Acetic acid	Output	1	t	EAX OC
9	13	Lignin (bone dry)	Output	0	kg	EAX OC
9	14	Electricity	Output	2600	kWh	EAX OC
9	15	CO2 (from lignin)	Output	1.8	t	EAX OC
9	16	CO2 (from natural gas)	Output	2.7	t	EAX OC
9	17	Feedstock (bone dry)	Input	1.9	t	EAX LE
9	18	Enzymes	Input	16	kg	EAX LE
9	19	Sulfuric Acid	Input	34	kg	EAX LE
9	20	Ammonia	Input	23	kg	EAX LE
9	21	Sodium hydroxide	Input	45	kg	EAX LE
9	22	Clarifier polymer	Input	1.1	kg	EAX LE
9	23	Fermentation nutrients	Input	50	kg	EAX LE
9	24	Lime	Input	0	kg	EAX LE
9	25	Natural gas	Input	58	GJ	EAX LE
9	26	Ethyl acetate	Input	5.2	kg	EAX LE
9	27	Electricity	Input	320	kwh	EAX LE
9	28	Acetic acid	Output	1	t	EAX LE
9	29	Lignin (bone dry)	Output	440	kg	EAX LE
9	30	Electricity	Output	0	kwh	EAX LE
9	31	CO2 (from lignin)	Output	0	t	EAX LE
9	32	CO2 (from natural gas)	Output	3.2	t	EAX LE
9	33	Feedstock (bone dry)	Input	1.9	t	ADX OC
9	34	Enzymes	Input	16	kg	ADX OC
9	35	Sulfuric Acid	Input	34	kg	ADX OC
9	36	Ammonia	Input	23	kg	ADX OC
9	37	Sodium hydroxide	Input	45	kg	ADX OC
9	38	Clarifier polymer	Input	1.1	kg	ADX OC
9	39	Fermentation nutrients	Input	50	kg	ADX OC
9	40	Lime	Input	26	kg	ADX OC
9	41	Natural gas	Input	19	GJ	ADX OC
9	42	Alamine	Input	1.9	kg	ADX OC
9	43	Diisobutyl ketone (DIBK)	Input	1.9	kg	ADX OC
9	44	Electricity	Input	0	kWh	ADX OC
9	45	Acetic acid	Output	1	t	ADX OC
9	46	Lignin (bone dry)	Output	0	kg	ADX OC
9	47	Electricity	Output	860	kWh	ADX OC
9	48	CO2 (from lignin)	Output	1.8	t	ADX OC
9	49	CO2 (from natural gas)	Output	0.99	t	ADX OC
9	50	Feedstock (bone dry)	Input	1.9	t	ADX LE
9	51	Enzymes	Input	16	kg	ADX LE
9	52	Sulfuric Acid	Input	34	kg	ADX LE
9	53	Ammonia	Input	23	kg	ADX LE
9	54	Sodium hydroxide	Input	45	kg	ADX LE
9	55	Clarifier polymer	Input	1.1	kg	ADX LE
9	56	Fermentation nutrients	Input	50	kg	ADX LE
9	57	Natural gas	Input	28	GJ	ADX LE
9	58	Electricity	Input	300	kWh	ADX LE
9	59	Alamine	Input	1.9	kg	ADX LE
9	60	Diisobutyl ketone (DIBK)	Input	1.9	kg	ADX LE
9	61	Acetic acid	Output	1	t	ADX LE
9	62	Lignin (bone dry)	Output	440	kg	ADX LE
9	63	CO2 (from natural gas)	Output	1.4	t	ADX LE
11	1	EFB	Input	1.877	kg	Ethanol and ethylene production	Pretreatment and saccharification
11	2	H2O	Input	2.934	kg	Ethanol and ethylene production	Pretreatment and saccharification
11	3	NH3	Input	0.02	kg	Ethanol and ethylene production	Pretreatment and saccharification
11	4	H2SO4	Input	0.033	kg	Ethanol and ethylene production	Pretreatment and saccharification
11	5	Enzyme	Input	0.01	kg	Ethanol and ethylene production	Pretreatment and saccharification
11	6	Heat	Input	1.928	MJ	Ethanol and ethylene production	Pretreatment and saccharification
11	7	Electricity	Input	0.0011	kWh	Ethanol and ethylene production	Pretreatment and saccharification
11	8	Transport	Input	0.05631	tkm	Ethanol and ethylene production	Pretreatment and saccharification
11	9	NH3	Input	0.002	kg	Ethanol and ethylene production	Pretreatment and saccharification
11	10	Hexose and pentose	Output	1	kg	Ethanol and ethylene production	Pretreatment and saccharification
11	11	Lignin	Output	0.48	kg	Ethanol and ethylene production	Pretreatment and saccharification
11	12	H2O	Output	3.86	kg	Ethanol and ethylene production	Pretreatment and saccharification
11	13	Ethanol	Output	0.029	kg	Ethanol and ethylene production	Pretreatment and saccharification
11	14	Acetic acid	Output	0.008	kg	Ethanol and ethylene production	Pretreatment and saccharification
11	15	CO2	Output	0.0077	kg	Ethanol and ethylene production	Pretreatment and saccharification
11	16	CO	Output	1.4e-05	kg	Ethanol and ethylene production	Pretreatment and saccharification
11	17	NOx	Output	9.6e-05	kg	Ethanol and ethylene production	Pretreatment and saccharification
11	18	Hexose and pentose	Input	2.38	kg	Ethanol and ethylene production	Fermentation and ethanol purification
11	19	DAP	Input	0.041	kg	Ethanol and ethylene production	Fermentation and ethanol purification
11	20	Electricity	Input	0.00078	kWh	Ethanol and ethylene production	Fermentation and ethanol purification
11	21	Heat	Input	2.85	MJ	Ethanol and ethylene production	Fermentation and ethanol purification
11	22	Ethanol	Input	0.132	kg	Ethanol and ethylene production	Fermentation and ethanol purification
11	23	Ethanol	Output	1	kg	Ethanol and ethylene production	Fermentation and ethanol purification
11	24	H2O	Output	0.0083	kg	Ethanol and ethylene production	Fermentation and ethanol purification
11	25	Ethanol	Input	1.77	kg	Ethanol and ethylene production	Ethylene production
11	26	NaOH	Input	0.57	kg	Ethanol and ethylene production	Ethylene production
11	27	H2O	Input	0.237	kg	Ethanol and ethylene production	Ethylene production
11	28	Electricity	Input	0.261	kWh	Ethanol and ethylene production	Ethylene production
11	29	Heat	Input	3.76	MJ	Ethanol and ethylene production	Ethylene production
11	30	Catalyst	Input	0.23	kg	Ethanol and ethylene production	Ethylene production
11	31	Bioethylene	Output	1	kg	Ethanol and ethylene production	Ethylene production
11	32	Exhaust gases Ethylene	Output	0.001	kg	Ethanol and ethylene production	Ethylene production
11	33	Waste H2O	Output	1.35	kg	Ethanol and ethylene production	Ethylene production
11	34	Ethylene	Output	0.045	kg	Ethanol and ethylene production	Ethylene production
11	35	OH[-]	Output	0.036	kg	Ethanol and ethylene production	Ethylene production
11	36	CO3 2−	Output	0.042	kg	Ethanol and ethylene production	Ethylene production
11	37	Na[+]	Output	0.082	kg	Ethanol and ethylene production	Ethylene production
11	38	Butene	Output	0.0053	kg	Ethanol and ethylene production	Ethylene production
11	39	Acetaldehyde	Output	0.0033	kg	Ethanol and ethylene production	Ethylene production
15	1	CO2 input	Input	4.557	g	Small-scale experimental setup	Electrochemical process
15	2	Water input	Input	5.877	g	Small-scale experimental setup	Electrochemical process
15	3	Energy requirement for electrochemical process	Input	0.0386	kWh	Small-scale experimental setup	Electrochemical process
15	4	C2H4 (ethylene)	Output	1	g	Small-scale experimental setup	Electrochemical process
15	5	H2 (hydrogen gas)	Output	0.04	g	Small-scale experimental setup	Electrochemical process
15	6	CO (carbon monoxide)	Output	0.377	g	Small-scale experimental setup	Electrochemical process
15	7	CH4 (methane)	Output	0.006	g	Small-scale experimental setup	Electrochemical process
15	8	C2H5OH (ethanol)	Output	0.241	g	Small-scale experimental setup	Electrochemical process
15	9	CH3COOH (acetic acid)	Output	0.067	g	Small-scale experimental setup	Electrochemical process
15	10	HCOOH (formic acid)	Output	0.165	g	Small-scale experimental setup	Electrochemical process
15	11	C3H7OH (1-propanol)	Output	0.042	g	Small-scale experimental setup	Electrochemical process
15	12	H2O	Output	3.276	g	Small-scale experimental setup	Electrochemical process
15	13	O2	Output	5.22	g	Small-scale experimental setup	Electrochemical process
15	14	CO2 input	Input	4.56	t	large-scale model	CO2 capture via MEA
15	15
15	16	Energy use	Input	0.0386	GWh	large-scale model	Electrochemical process
15	17	Mixed products from electrochemical process	Input	10.44	t	large-scale model	adsorption process
15	18	Energy requirement for adsorption process	Input	2.6	GJ/t	large-scale model	adsorption process
15	19	C2H4 (ethylene)	Output	1	t	large-scale model	adsorption process
15	20	H2 (hydrogen gas)	Output	0.04	t	large-scale model	adsorption process
15	21	CO (carbon monoxide)	Output	0.377	t	large-scale model	adsorption process
15	22	CH4 (methane)	Output	0.006	t	large-scale model	adsorption process
15	23	Mixed chemicals in aqueous form	Output	0.515	t	large-scale model	adsorption process
15	24
15	25
16	1	NPK (9-18-27)	Input	6098	t/y	Not mentioned	Fertilizers
16	2	N fertilizer (ammonium nitrate)	Input	2541	t/y	Not mentioned	Fertilizers
16	3	Ammonia	Output	47	t/y	Not mentioned	Fertilizers
16	4	Nitrous oxide	Output	24	t/y	Not mentioned	Fertilizers
16	5	Nitrogen oxides	Output	5	t/y	Not mentioned	Fertilizers
16	6	Metil pirimifos	Input	6	t/y	Not mentioned	Pesticides
16	7	Gliphosate	Input	50	t/y	Not mentioned	Pesticides
16	8	Propineb	Input	4	t/y	Not mentioned	Pesticides
16	9	Metil pirimifos	Output	6	t/y	Not mentioned	Pesticides
16	10	Gliphosate	Output	50	t/y	Not mentioned	Pesticides
16	11	Propineb	Output	4	t/y	Not mentioned	Pesticides
16	12	Diesel	Input	843	t/y	Not mentioned	Diesel
16	13	Electricity	Input	20	MWh/y	Not mentioned	Diesel
16	14	Carbon dioxide	Output	2630	t/y	Not mentioned	Diesel
16	15	Carbon monoxide	Output	9.58	t/y	Not mentioned	Diesel
16	16	Methane	Output	0.14	t/y	Not mentioned	Diesel
16	17	NMVOC	Output	4.36	t/y	Not mentioned	Diesel
16	18	Nitrous oxide	Output	0.1	t/y	Not mentioned	Diesel
16	19	Nitrogen oxides	Output	37.11	t/y	Not mentioned	Diesel
16	20	Particulates	Output	3.77	t/y	Not mentioned	Diesel
16	21	Sulphur dioxide	Output	0.85	t/y	Not mentioned	Diesel
16	22	Ammonia	Output	16.8	kg/y	Not mentioned	Diesel
16	23	Polycyclic aromatic hydrocarbons	Output	2.8	kg/y	Not mentioned	Diesel
16	24	Ammonia	Output	47	t/y	Not mentioned	Electricity
16	25	Nitrous oxide	Output	24	t/y	Not mentioned	Electricity
16	26	Nitrogen oxides	Output	5	t/y	Not mentioned	Electricity
16	27	Nitrate	Output	615	t/y	Not mentioned	Electricity
16	28	Phosphate	Output	11	t/y	Not mentioned	Electricity
16	29	Cadmium	Output	13	kg/y	Not mentioned	Electricity
16	30	Copper	Output	51	kg/y	Not mentioned	Electricity
16	31	Zinc	Output	306	kg/y	Not mentioned	Electricity
16	32	Lead	Output	20	kg/y	Not mentioned	Electricity
16	33	Nickel	Output	59	kg/y	Not mentioned	Electricity
16	34	Chromium	Output	195	kg/y	Not mentioned	Electricity
16	35	Metil pirimifos	Output	6	t/y	Not mentioned	Emissions to soil
16	36	Gliphosate	Output	50	t/y	Not mentioned	Emissions to soil
16	37	Propineb	Output	4	t/y	Not mentioned	Emissions to soil
16	38	Feedstock to the production plant	Input	1.4e-09	t km/y	Not mentioned	Transport
16	39
16	40	Poplar wood (wet)	Input	15847	kg	Direct ethanol dehydration	Biomass
16	41	Alumina	Input	0.2	kg	Direct ethanol dehydration	Catalysts
16	42	Co e Mo	Input	0.11	kg	Direct ethanol dehydration	Catalysts
16	43	Nickel	Input	0.02	kg	Direct ethanol dehydration	Catalysts
16	44	ZnO	Input	0.54	kg	Direct ethanol dehydration	Catalysts
16	45	Zeolite	Input	0.24	kg	Direct ethanol dehydration	Catalysts
16	46	KOH	Input	0.02	kg	Direct ethanol dehydration	Catalysts
16	47	Water Power generation	Input	1900	kg	Direct ethanol dehydration	Water
16	48	Water Process	Input	2365	kg	Direct ethanol dehydration	Water
16	49	Wastewater to treatment	Output	12373	kg	Direct ethanol dehydration	Water
16	50	Electricity	Input	1.7	MWh	Direct ethanol dehydration	Energy
16	51	Natural gas	Input	84	NmÂ³	Direct ethanol dehydration	Energy
16	52	CO biogenic	Output	352	kg	Direct ethanol dehydration	Energy
16	53	CO fossil	Output	0.06	kg	Direct ethanol dehydration	Energy
16	54	CO2 biogenic	Output	14813	kg	Direct ethanol dehydration	Energy
16	55	CO2 fossil	Output	179	kg	Direct ethanol dehydration	Energy
16	56	SO2	Output	0.58	kg	Direct ethanol dehydration	Energy
16	57	SO3	Output	0.01	kg	Direct ethanol dehydration	Energy
16	58	Solid waste to landfill (Biomass chippings)	Output	396	kg	Direct ethanol dehydration	Energy
16	59	Ash	Output	100	kg	Direct ethanol dehydration	Energy
16	60	Spent catalysts	Output	4.2	kg	Direct ethanol dehydration	Energy
16	61	Spent bed materials	Output	0.24	kg	Direct ethanol dehydration	Energy
16	62	Wastewater to treatment	Output	12373	kg	Direct ethanol dehydration	Energy
16	63	Methanol (co-product)	Output	469	kg	Direct ethanol dehydration	Energy
16	64	Propanol (co-product)	Output	182	kg	Direct ethanol dehydration	Energy
16	65	Sulphur cake (co-product)	Output	3.59	kg	Direct ethanol dehydration	Energy
16	66
16	67	Poplar wood (wet)	Input	8636	kg	Indirect ethanol dehydration
16	68	Alumina	Input	0.35	kg	Indirect ethanol dehydration
16	69	Co e Mo	Input	0.07	kg	Indirect ethanol dehydration
16	70	Cu/ZnO	Input	0.03	kg	Indirect ethanol dehydration
16	71	H-Mordenite	Input	0.2	kg	Indirect ethanol dehydration
16	72	Nickel	Input	0.03	kg	Indirect ethanol dehydration
16	73	ZnO	Input	0.7	kg	Indirect ethanol dehydration
16	74	Sand	Input	10.95	kg	Indirect ethanol dehydration
16	75	Zeolite	Input	0.07	kg	Indirect ethanol dehydration
16	76	Monoethanolamine	Input	3.74	kg	Indirect ethanol dehydration
16	77	Diesel	Input	35.82	kg	Indirect ethanol dehydration
16	78	NaOH	Input	0.03	kg	Indirect ethanol dehydration
16	79	Power generation Water	Input	10017	kg	Indirect ethanol dehydration
16	80	Process Water	Input	31458	kg	Indirect ethanol dehydration
16	81	Electricity	Input	0.39	MWh	Indirect ethanol dehydration
16	82	Natural gas	Input	84	Nm³	Indirect ethanol dehydration
16	83	CO biogenic	Output	0	kg	Indirect ethanol dehydration
16	84	CO fossil	Output	0.06	kg	Indirect ethanol dehydration
16	85	CO2 biogenic	Output	292	kg	Indirect ethanol dehydration
16	86	CO2 fossil	Output	9452	kg	Indirect ethanol dehydration
16	87	Biomass (chippings)	Output	216	kg	Indirect ethanol dehydration
16	88	Ash	Output	65	kg	Indirect ethanol dehydration
16	89	Spent catalysts	Output	1.42	kg	Indirect ethanol dehydration
16	90	Spent bed materials	Output	0.07	kg	Indirect ethanol dehydration
16	91	Wastewater to treatment	Output	28586	kg	Indirect ethanol dehydration
16	92	Sulphur cake (70% water)	Output	2.45	kg	Indirect ethanol dehydration
16	93
16	94	Poplar wood (wet)	Input	16889	kg	Dimethyl ether to olefins
16	95	Co e Mo	Input	0.12	kg	Dimethyl ether to olefins
16	96	CZA/HZSM-5	Input	8.4	kg	Dimethyl ether to olefins
16	97	Zeolite	Input	4.2	kg	Dimethyl ether to olefins
16	98
16	99	DEPG	Input	1.6	kg	Dimethyl ether to olefins
16	100	KOH	Input	0.03	kg	Dimethyl ether to olefins
16	101	Methanol	Input	0.38	kg	Dimethyl ether to olefins
16	102	Oxygen	Input	8423	kg	Dimethyl ether to olefins
16	103	Water Power generation	Input	1904	kg	Dimethyl ether to olefins
16	104	Process	Input	866	kg	Dimethyl ether to olefins
16	105	Electricity	Input	2.1	MWh	Dimethyl ether to olefins
16	106	CO biogenic	Output	137	kg	Dimethyl ether to olefins
16	107	CO2 fossil	Output	14795	kg	Dimethyl ether to olefins
16	108	SO2	Output	0.47	kg	Dimethyl ether to olefins
16	109	Biomass (chippings)	Output	422	kg	Dimethyl ether to olefins
16	110	Ash	Output	106	kg	Dimethyl ether to olefins
16	111	Spent catalysts	Output	14.48	kg	Dimethyl ether to olefins
16	112	Spent bed materials	Output	0.03	kg	Dimethyl ether to olefins
16	113	Wastewater to treatment	Output	12018	kg	Dimethyl ether to olefins
16	114	Lique fi ed petroleum gas	Output	357	kg	Dimethyl ether to olefins
16	115	Propylene ( > 99.5%)	Output	871	kg	Dimethyl ether to olefins
16	116	Sulphur cake (70% water)	Output	3.85	kg	Dimethyl ether to olefins
16	117
19	1	Fuel Coal	Input	47.3	GJ	CtEG Route	coal transportation
19	2	Diesel	Input	2.47	GJ	CtEG Route	coal transportation
19	3	Gasoline	Input	1.73	GJ	CtEG Route	coal transportation
19	4	Electricity	Input	1.47	GJ	CtEG Route	coal transportation
19	5	CO2	Output	63	kg	CtEG Route	coal transportation
19	6	CH4	Output	0.342	kg	CtEG Route	coal transportation
19	7	N2O	Output	0.000147	kg	CtEG Route	coal transportation
19	8	CO	Output	0.541	kg	CtEG Route	coal transportation
19	9	NOx	Output	0.117	kg	CtEG Route	coal transportation
19	10	SO2	Output	0.0269	kg	CtEG Route	coal transportation
19	11	PM10	Output	0.108	kg	CtEG Route	coal transportation
19	12	VOC	Output	0.008	kg	CtEG Route	coal transportation
19	13	Oil	Input	2.31	t	OtEG Route	oil mining and processing
19	14	Fuel Coal	Input	8.69	GJ	OtEG Route	oil mining and processing
19	15	Diesel	Input	6.51	GJ	OtEG Route	oil mining and processing
19	17	Electricity	Input	12.9	GJ	OtEG Route	oil mining and processing
19	18	CO2	Output	38	kg	OtEG Route	oil mining and processing
19	19	CH4	Output	89.1	kg	OtEG Route	oil mining and processing
19	20	N2O	Output	0.0651	kg	OtEG Route	oil mining and processing
19	21	CO	Output	0.0977	kg	OtEG Route	oil mining and processing
19	22	NOx	Output	0.0597	kg	OtEG Route	oil mining and processing
19	23	SO2	Output	0.0347	kg	OtEG Route	oil mining and processing
19	24	PM10	Output	0.0934	kg	OtEG Route	oil mining and processing
19	25	VOC	Output	0.076	kg	OtEG Route	oil mining and processing
19	26	Oil	Input	2.31	t	OtEG Route	oil transportation
19	27	Fuel Coal	Input	30.6	GJ	OtEG Route	oil transportation
19	28	Diesel	Input	20.6	GJ	OtEG Route	oil transportation
19	29	Electricity	Input	1.82	GJ	OtEG Route	oil transportation
19	30	CO2	Output	65.7	kg	OtEG Route	oil transportation
19	31	CH4	Output	4.1	kg	OtEG Route	oil transportation
19	32	N2O	Output	1.25	kg	OtEG Route	oil transportation
19	33	CO	Output	6.61	kg	OtEG Route	oil transportation
19	34	NOx	Output	1.41	kg	OtEG Route	oil transportation
19	35	SO2	Output	2.81	kg	OtEG Route	oil transportation
19	36	PM10	Output	1.32	kg	OtEG Route	oil transportation
19	37	VOC	Output	6.19	kg	OtEG Route	oil transportation
19	38	Oil	Input	2.31	t	OtEG Route	oil to EG
19	39	Fuel Coal	Input	39.3	GJ	OtEG Route	oil to EG
19	40	Electricity	Input	21	GJ	OtEG Route	oil to EG
19	41	CO2	Output	465	kg	OtEG Route	oil to EG
19	42	CH4	Output	94.5	kg	OtEG Route	oil to EG
19	43	N2O	Output	0.0385	kg	OtEG Route	oil to EG
19	44	CO	Output	37.4	kg	OtEG Route	oil to EG
19	45	NOx	Output	26.8	kg	OtEG Route	oil to EG
19	46	SO2	Output	69.8	kg	OtEG Route	oil to EG
19	47	PM10	Output	28.4	kg	OtEG Route	oil to EG
19	48	VOC	Output	34.8	kg	OtEG Route	oil to EG
19	49
19	50
19	51	Biomass	Input	2.48	t	BtEG Route	biomass collection
19	52	CO2	Output	-3.49	kg	BtEG Route	biomass collection
19	53	CH4	Output	3.14	kg	BtEG Route	biomass collection
19	54	N2O	Output	0.00101	kg	BtEG Route	biomass collection
19	55	CO	Output	0.053	kg	BtEG Route	biomass collection
19	56	NOx	Output	0.0671	kg	BtEG Route	biomass collection
19	57	SO2	Output	0.0115	kg	BtEG Route	biomass collection
19	58	PM10	Output	0.0867	kg	BtEG Route	biomass collection
19	59	VOC	Output	0.0498	kg	BtEG Route	biomass collection
19	60	Biomass	Input	2.48	t	BtEG Route	biomass transportation
19	61	Diesel	Input	2.02	GJ	BtEG Route	biomass transportation
19	62	Gasoline	Input	0.0952	GJ	BtEG Route	biomass transportation
19	63	Electricity	Input	3.8	GJ	BtEG Route	biomass transportation
19	64	CO2	Output	2.95	kg	BtEG Route	biomass transportation
19	65	CH4	Output	0.0332	kg	BtEG Route	biomass transportation
19	66	N2O	Output	0.0014	kg	BtEG Route	biomass transportation
19	67	CO	Output	0.0872	kg	BtEG Route	biomass transportation
19	68	NOx	Output	0.0813	kg	BtEG Route	biomass transportation
19	69	SO2	Output	0.011	kg	BtEG Route	biomass transportation
19	70	PM10	Output	0.0157	kg	BtEG Route	biomass transportation
19	71	VOC	Output	0.0101	kg	BtEG Route	biomass transportation
19	72	Biomass	Input	2.48	t	BtEG Route	biomass to EG
19	73	Fuel Coal	Input	4.76	GJ	BtEG Route	biomass to EG
19	74	Diesel	Input	20	GJ	BtEG Route	biomass to EG
19	75	Gasoline	Input	1.39	GJ	BtEG Route	biomass to EG
19	76	Electricity	Input	3.8	GJ	BtEG Route	biomass to EG
19	77	CO2	Output	3180	kg	BtEG Route	biomass to EG
19	78	CH4	Output	28.2	kg	BtEG Route	biomass to EG
19	79	N2O	Output	0.0859	kg	BtEG Route	biomass to EG
19	80	CO	Output	13.9	kg	BtEG Route	biomass to EG
19	81	NOx	Output	37.7	kg	BtEG Route	biomass to EG
19	82	SO2	Output	21.2	kg	BtEG Route	biomass to EG
19	83	PM10	Output	37.3	kg	BtEG Route	biomass to EG
19	84	VOC	Output	0.0446	kg	BtEG Route	biomass to EG
21	1
21	2	Phosphoric acid	Input	0.55	kg	Palm oil refining process
21	3	Bleaching earth	Input	11.1	kg	Palm oil refining process
21	4	Electricity	Input	10.2	kWh	Palm oil refining process
21	5	Natural gas	Input	1.66	kg	Palm oil refining process
21	6	Diesel	Input	0.24	kg	Palm oil refining process
21	7	Fuel oil	Input	0.5	kg	Palm oil refining process
21	8
21	9
21	10
21	11
21	12
21	13
21	14	Electricity	Input	0.24	MJ	AF rendering process
21	15	Natural gas	Input	4.32	MJ	AF rendering process
21	16	Fuel oil	Input	0.53	MJ	AF rendering process
21	17	Electricity	Input	0.24	MJ	AF rendering process
21	18	Fuel oil	Input	0.53	MJ	AF rendering process
21	19	Water	Input	2.75	kg	AF rendering process
21	20
21	21	Wastewater	Output	2.68	kg	AF rendering process
21	22	Sludge	Output	0.85	kg	AF rendering process
21	23	Solid waste	Output	0.03	kg	AF rendering process
21	24	Fish cleaning waste	Input	4.76	kg	FF rendering process
21	25	Formic acid	Input	0.118	kg	FF rendering process
21	26	Heat	Input	0.085	MJ	FF rendering process
21	27	Electricity	Input	0.148	MJ	FF rendering process
21	28	Fish remains/fish meal	Output	1.06	kg	FF rendering process
21	29	Fish fat	Output	1	kg	FF rendering process
23	1	Ethylene	Input	1.21	kg	Propylene production from ethylene obtained from bioethanol dehydration	Not mentioned
23	2	H2	Input	0.00068	kg	Propylene production from ethylene obtained from bioethanol dehydration	Not mentioned
23	3	Heavy oil A	Input	4.37	MJ	Propylene production from ethylene obtained from bioethanol dehydration	Not mentioned
23	4	Electricity	Input	2.78	kWh	Propylene production from ethylene obtained from bioethanol dehydration	Not mentioned
23	5	C3H6	Output	1	kg	Propylene production from ethylene obtained from bioethanol dehydration	Not mentioned
23	6	C2H4	Output	0.0195	kg	Propylene production from ethylene obtained from bioethanol dehydration	Not mentioned
23	7	C5H12, C6H14	Output	0.185	kg	Propylene production from ethylene obtained from bioethanol dehydration	Not mentioned
23	8	C3H8	Output	0.00949	kg	Propylene production from ethylene obtained from bioethanol dehydration	Not mentioned
23	9	Fossil-derived CO2	Output	1.52	kg	Propylene production from ethylene obtained from bioethanol dehydration	Not mentioned
23	10	Synthesis gas	Input	2.25	kg	Synthesis gas route	Methanol production from synthesis gas
23	11	Deionized water	Input	0.236	kg	Synthesis gas route	Methanol production from synthesis gas
23	12	Heavy oil A	Input	3.74	MJ	Synthesis gas route	Methanol production from synthesis gas
23	13	Electricity	Input	0.958	kWh	Synthesis gas route	Methanol production from synthesis gas
23	14	Methanol	Output	1	kg	Synthesis gas route	Methanol production from synthesis gas
23	15	Fossil-derived CO2	Output	1.76	kg	Synthesis gas route	Methanol production from synthesis gas
25	1	Propylene oxide	Input	0.9034	kg	BAU
25	2	Glycerol solution	Input	0.2165	kg	BAU
25	3	Water	Input	0.2165	kg	BAU
25	4	Electricity	Input	0.1229	kW	BAU
25	5	Heating demand	Input	11.231	MJ	BAU
25	6	Cooling demand	Input	12.64	MJ	BAU
25	7	Gas Purge	Output	0.0052	kg	BAU
25	8	Wastewater	Output	0.4305	kg	BAU
25	9	Byproducts (DPG, TPG, EG, Me, Et, Pr)	Output	0.1326	kg	BAU
25	10
25	11	Glycerol solution	Input	1.4238	kg	GB-1
25	12	Hydrogen	Input	0.0297	kg	GB-1
25	13	Water	Input	0.0093	kg	GB-1
25	14	Electricity	Input	0.0578	kW	GB-1
25	15	Heating demand	Input	4.635	MJ	GB-1
25	16	Cooling demand	Input	5.97	MJ	GB-1
25	17	Gas Purge	Output	0.0052	kg	GB-1
25	18	Wastewater	Output	0.4305	kg	GB-1
25	19	Byproducts (DPG)	Output	0.0111	kg	GB-1
25	20	Byproducts (TPG)	Output	0.0178	kg	GB-1
25	21	Glycerol solution	Input	1.4238	kg	GB-2
25	22	Hydrogen	Input	0.0321	kg	GB-2
25	23	Water	Input	0.0093	kg	GB-2
25	24	Electricity	Input	0.0582	kW	GB-2
25	25	Heating demand	Input	4.819	MJ	GB-2
25	26	Cooling demand	Input	6.157	MJ	GB-2
25	27	Gas Purge	Output	0.0071	kg	GB-2
25	28	Wastewater	Output	0.3798	kg	GB-2
25	29	Byproducts (Me)	Output	0.008	kg	GB-2
25	30	Byproducts (EG)	Output	0.0146	kg	GB-2
25	31	Glycerol solution	Input	3.73	kg	GB-3
25	32	Water	Input	0.5687	kg	GB-3
25	33	Electricity	Input	0.1214	kW	GB-3
25	34	Heating demand	Input	16.707	MJ	GB-3
25	35	Cooling demand	Input	12.288	MJ	GB-3
25	36	Gas Purge	Output	2.7926	kg	GB-3
25	37	Wastewater	Output	0.3205	kg	GB-3
25	38	Byproducts DPG	Output	0.0325	kg	GB-3
25	39	Byproducts TPG	Output	0.1316	kg	GB-3
25	40	Byproducts EG	Output	0.0165	kg	GB-3
32	1	Air	Input	170	m³/h
32	2	Water loss makeup	Input	2	L/h
32	3	Carbon dioxide	Input	16	kg/h
32	4	Ethanol (azeotrope)	Input	23	kg/h
32	5	Ammonia	Input	18	kg/h
32	6	NaOH (solid)	Input	13	kg/h
32	7	Acetonitrile	Output	9	kg/h
32	8	Ammonium bicarbonate	Output	52	kg/h
32	9	Sodium cyanide	Output	3	kg/h
32	10	Sodium carbonate	Output	6	kg/h
32	11	Flue gases	Output	75	m³/h
32	12	Water drainage	Output	7	L/h
35	1	Crude glycerol	Input	1.5	kg	biocatalytic production of DHA from GLY
35	2	Process water	Input	10.2	kg	biocatalytic production of DHA from GLY
35	3	Nutrients	Input	0.05	kg	biocatalytic production of DHA from GLY
35	4	Air	Input	3.1	kg	biocatalytic production of DHA from GLY
35	5	Butanol	Input	0.06	kg	biocatalytic production of DHA from GLY
35	6	Steam (6 bar)	Input	44.7	MJ	biocatalytic production of DHA from GLY
35	7	Cooling water	Input	818	kg	biocatalytic production of DHA from GLY
35	8	Waste	Output	11	kg	biocatalytic production of DHA from GLY
35	11	DHA	Input	1.1	kg	Chemocatalytic production of LA from DHA in water
35	12	Process water	Input	6.5	kg	Chemocatalytic production of LA from DHA in water
35	13	Butanol	Input	0.02	kg	Chemocatalytic production of LA from DHA in water
35	14	Catalyst	Input	0.3	kg	Chemocatalytic production of LA from DHA in water
35	15	Steam (6 bar)	Input	18.2	MJ	Chemocatalytic production of LA from DHA in water
35	16	Cooling water	Input	434	kg	Chemocatalytic production of LA from DHA in water
35	17	Waste	Output	6.9	kg	Chemocatalytic production of LA from DHA in water
35	20	DHA	Input	1.09	kg/kg LA	Chemocatalytic production of LA from DHA in methanol
35	21	Process water	Input	0.41	kg/kg LA	Chemocatalytic production of LA from DHA in methanol
35	22	Methanol	Input	0.03	kg/kg LA	Chemocatalytic production of LA from DHA in methanol
35	23	Catalyst	Input	0.1	kg/kg LA	Chemocatalytic production of LA from DHA in methanol
35	24	Steam (6 bar)	Input	12.7	MJ/kg LA	Chemocatalytic production of LA from DHA in methanol
35	25	Cooling water	Input	649	kg/kg LA	Chemocatalytic production of LA from DHA in methanol
35	26	Waste	Output	0.59	kg/kg LA	Chemocatalytic production of LA from DHA in methanol
36	0	Sugarcane bagasse	Input	4.78	kg
36	1	Electricity	Input	0.78	MJ
36	2	Reduced bagasse	Input	4.78	kg
36	3	NaOH	Input	1.9	kg
36	4	Fresh water	Input	90.8	kg
36	5	Natural gas	Input	0.55	kg
36	6	Fresh water	Input	478	kg
36	7	Pretreated solid fraction	Input	12.68	kg
36	8	Solid fraction	Input	5.64	kg
36	9	Fresh water	Input	14.81	kg
36	10	H2SO4	Input	0.02	kg
36	11	Enzyme	Input	0.56	kg
36	12	Hydrolyzed liquid stream	Input	15.61	kg
36	13	Yeast extract	Input	0.15	kg
36	14	Inoculum	Input	1.57	L
36	15	CaCO3	Input	0.94	kg
36	16	H2SO4	Input	0.59	kg
36	17	Calcium lactate	Input	1.31	kg
36	18	Fermented broth	Input	16	kg
36	19	Reduced bagasse	Output	4.78	kg
36	20	Pretreated bagasse recovered as solid	Output	12.68	kg
36	21	Liquid fraction	Output	83.84	kg
36	22	CO2 emissions due to natural gas	Output	0.016	kg
36	23	Waste wash stream with lignin	Output	485.04	kg
36	24	Solid fraction	Output	5.64	kg
36	25	Hydrolyzed liquid stream	Output	15.61	kg
36	26	Hydrolyzed solid stream	Output	5.02	kg
36	27	Enzyme recovered	Output	0.42	kg
36	28	Enzyme emissions	Output	0.78	kg
36	29	Fermented broth	Output	16	kg
36	30	Calcium lactate in the broth	Output	1.31	kg
36	31	CO2 formed as a byproduct	Output	0.26	kg
36	32	Lactic acid	Output	1.08	kg
36	33	Water	Output	16	kg
36	34	Gypsum	Output	0.82	kg
38	1	Vine Shoots	Input	2466.4	kg/h	VS LA
38	2	H2SO4	Input	142.1	kg/h	VS LA
38	3	Lime	Input	159.4	kg/h	VS LA
38	4	Water	Input	4479.5	kg/h	VS LA
38	5	HP Steam	Input	316.8	kg/h	VS LA
38	6	Hydrolysate	Input	7035.5	kg/h	VS LA
38	7	Enzyme	Input	122.4	kg/h	VS LA
38	8	Saccharified stream	Input	7157.9	kg/h	VS LA
38	9	Lactobacillus bacteria	Input	2.1	kg/h	VS LA
38	10	Yeast extract	Input	20.2	kg/h	VS LA
38	11	Nutrients	Input	40.4	kg/h	VS LA
38	12	Methanol	Input	7.4	kg/h	VS LA
38	13
38	14	Aqueous residues	Input	8467.5	kg/h	VS LA
38	15	Utilities plant	Input	145	kg/h	VS LA
38	16	Air	Input	4786.7	kg/h	VS LA
38	17	Clean water	Input	7533.8	kg/h	VS LA
38	18	Biogas	Input	511.7	kg/h	VS LA
38	19	Sludge	Input	253.1	kg/h	VS LA
38	20	Vine Shoots	Input	1640.7	kg/h	VS LA
38	21	Solid residues	Input	903	kg/h	VS LA
38	22	Lime	Input	8.6	kg/h	VS LA
38	23	Water	Input	671.6	kg/h	VS LA
38	24	Air	Input	12843.5	kg/h	VS LA
38	25	Hydrolysate	Output	7035.5	kg/h	VS LA
38	26	Aqueous residues	Output	528.8	kg/h	VS LA
38	27	Saccharified stream	Output	7157.9	kg/h	VS LA
38	28	Solid residues	Output	903	kg/h	VS LA
38	29	Aqueous residues	Output	6589.4	kg/h	VS LA
38	30	Lactic Acid	Output	208.3	kg/h	VS LA
38	31	Biogas	Output	511.7	kg/h	VS LA
38	32	Sludge	Output	253.1	kg/h	VS LA
38	33	Brine	Output	294.7	kg/h	VS LA
38	34
38	35
38	36	HP Steam	Output	316.8	kg/h	VS LA
38	37	Gypsum and ash	Output	505.6	kg/h	VS LA
38	38	Aqueous residues	Output	206.4	kg/h	VS LA
38	39	Emissions to air	Output	15803.3	kg/h	VS LA
38	40	Vine Shoots	Input	3267.2	kg/h	VS LF
38	41	H2SO4	Input	188	kg/h	VS LF
38	42	Water	Input	6983.6	kg/h	VS LF
38	43	HP Steam	Input	354.8	kg/h	VS LF
38	44	Air	Input	162.9	kg/h	VS LF
38	45	Enzyme	Input	161.4	kg/h	VS LF
38	46
38	47
38	48	Saccharified stream	Input	4586.5	kg/h	VS LF
38	49	Lactobacillus bacteria	Input	2.1	kg/h	VS LF
38	50	Nutrients	Input	14.6	kg/h	VS LF
38	51	Lime	Input	152.5	kg/h	VS LF
38	52	Methanol	Input	4.3	kg/h	VS LF
38	53	NaCl	Input	110.9	kg/h	VS LF
38	54	THF	Input	11.7	kg/h	VS LF
38	55	Aqueous residues	Input	11791	kg/h	VS LF
38	56	Utilities plant	Input	145	kg/h	VS LF
38	57	Air	Input	6923.7	kg/h	VS LF
38	58	Clean water	Input	10045.2	kg/h	VS LF
38	59	Biogas	Input	621.1	kg/h	VS LF
38	60	Sludge	Input	479.9	kg/h	VS LF
38	61	Vine Shoots	Input	840	kg/h	VS LF
38	62	Solid residues	Input	840.8	kg/h	VS LF
38	63	Lime	Input	13.9	kg/h	VS LF
38	64	Water	Input	712.7	kg/h	VS LF
38	65	Air	Input	12184.6	kg/h	VS LF
38	66	Hydrolysate	Output	4425.1	kg/h	VS LF
38	67	Liquid fraction	Output	5730.9	kg/h	VS LF
38	68	Aqueous residues	Output	626.9	kg/h	VS LF
38	69	Air emissions	Output	173.6	kg/h	VS LF
38	70	Saccharified stream	Output	4586.5	kg/h	VS LF
38	71	Solid residues	Output	840.8	kg/h	VS LF
38	72	Aqueous residues	Output	4069.1	kg/h	VS LF
38	73	Lactic Acid	Output	209.3	kg/h	VS LF
38	74	Aqueous residues	Output	5783.4	kg/h	VS LF
38	75	Furfural	Output	70	kg/h	VS LF
38	76	Biogas	Output	621.1	kg/h	VS LF
38	77	Sludge	Output	479.9	kg/h	VS LF
38	78	Brine	Output	763.9	kg/h	VS LF
38	79
38	80
38	81	HP Steam	Output	354.8	kg/h	VS LF
38	82	Gypsum and ash	Output	315.3	kg/h	VS LF
38	83	Aqueous residues	Output	194.8	kg/h	VS LF
38	84	Emissions to air	Output	14828.1	kg/h	VS LF
39	1	NG	Input	1.2	MJ	Biogas production	Biogas production
39	2	Electricity	Input	0.039	kWh	Biogas production	Biogas production
39	3	Corn steep liquor	Input	11	g	Biogas production	Biogas production
39	4	Diammonium phosphate	Input	1.6	g	Biogas production	Biogas production
39	5	Corn oil	Input	0.1	g	Biogas production	Biogas production
39	6	Sorbitol	Input	0.7	g	Biogas production	Biogas production
39	7	Glucose	Input	3.3	g	Biogas production	Biogas production
39	8	Process makeup water	Input	0.017	L	Biogas production	Biogas production
39	9	Biogas	Output	8.7	MJ	Biogas production	Biogas production
39	10	CO2	Output	0.35	kg	Biogas production	Biogas production
39	11	Digestate wet	Output	1.9	kg	Biogas production	Biogas production
39	12	NG	Input	1.3	MJ	Biogas production	LA production
39	13	Electricity	Input	0.39	kWh	Biogas production	LA production
39	14	Corn steep liquor	Input	22	g	Biogas production	LA production
39	15	Diammonium phosphate	Input	3.3	g	Biogas production	LA production
39	16	Corn oil	Input	0.14	g	Biogas production	LA production
39	17	Sorbitol	Input	1.5	g	Biogas production	LA production
39	18	Glucose	Input	6.9	g	Biogas production	LA production
39	19	Process makeup water	Input	0.7	L	Biogas production	LA production
39	20	Lactic acid	Output	0.36	kg	Biogas production	LA production
39	21	CO2	Output	0.15	kg	Biogas production	LA production
39	22	Digestate wet	Output	0.51	kg	Biogas production	LA production
47	1	Total	Input	3.8	t
47	2	Ethanol (93 wt%)	Input	3.22	t
47	3	Octane	Input	0.003	t
47	4	Water	Input	0.575	t
47	5	DMF	Input	0.001	t
47	6	Total	Output	3.8	t
47	7	1,3-BD	Output	1	t
47	8	Butenes	Output	0.097	t
47	9	Ethylene	Output	0.155	t
47	10	Propylene	Output	0.054	t
47	11	Acetaldehyde	Output	0.127	t
47	12	Hydrogen	Output	0.047	t
47	13	Residual fuel streams	Output	0.46	t
47	14	Wastewater	Output	1.861	t
49	1	Biomass (DM)	Input	65	t/h	Biomass to EtOH
49	2	Coal	Input	12.7	t/h	Biomass to EtOH
49	3	Heating	Input	99.3	MW	Biomass to EtOH
49	4	Cooling	Input	79.2	MW	Biomass to EtOH
49	5	Power	Input	3	MW	Biomass to EtOH
49	6	EtOH	Output	21820	lit/h	Biomass to EtOH
49	7	Power	Output	10.5	MW	Biomass to EtOH
49	8	Biomass (DM)	Input	65	t/h	Biomass to BD
49	9	Coal	Input	6.6	t/h	Biomass to BD
49	10	Heating	Input	106	MW	Biomass to BD
49	11	Cooling	Input	90	MW	Biomass to BD
49	12	Power	Input	3.8	MW	Biomass to BD
49	13	BD	Output	5.7	t/h	Biomass to BD
49	14	Power	Output	6.7	MW	Biomass to BD
49	15	Biomass (DM)	Input	65	t/h	Biomass to EtOH, coal burning
49	16	Coal	Input	12.7	t/h	Biomass to EtOH, coal burning
49	17	Heating	Input	99.3	MW	Biomass to EtOH, coal burning
49	18	Cooling	Input	79.2	MW	Biomass to EtOH, coal burning
49	19	Power	Input	3	MW	Biomass to EtOH, coal burning
49	20	EtOH	Output	21820	lit/h	Biomass to EtOH, coal burning
49	21	Power	Output	10.5	MW	Biomass to EtOH, coal burning
49	22	Biomass (DM)	Input	65	t/h	Biomass to BD, coal burning
49	23	Coal	Input	6.6	t/h	Biomass to BD, coal burning
49	24	Heating	Input	106	MW	Biomass to BD, coal burning
49	25	Cooling	Input	90	MW	Biomass to BD, coal burning
49	26	Power	Input	3.8	MW	Biomass to BD, coal burning
49	27	BD	Output	5.7	t/h	Biomass to BD, coal burning
49	28	Power	Output	6.7	MW	Biomass to BD, coal burning
58	1	Biomass (dried)	Input	10.04	ton	Two Stage Dilute Acid Hydrolysis
58	2	H2SO4	Input	0.32	ton	Two Stage Dilute Acid Hydrolysis
58	3	Water	Input	38.82	ton	Two Stage Dilute Acid Hydrolysis
58	4	Lime	Input	0.51	ton	Two Stage Dilute Acid Hydrolysis
58	5	Air	Input	35.15	ton	Two Stage Dilute Acid Hydrolysis
58	6	Electricity	Input	0.41	GJ	Two Stage Dilute Acid Hydrolysis
58	7	Prehydrolysate (dried)	Output	3.94	ton	Two Stage Dilute Acid Hydrolysis
58	8	Prehydrolysate (water)	Output	18.29	ton	Two Stage Dilute Acid Hydrolysis
58	9	Glucose (dried)	Output	2.77	ton	Two Stage Dilute Acid Hydrolysis
58	10	Glucose (water)	Output	19.11	ton	Two Stage Dilute Acid Hydrolysis
58	11	Heat	Output	-109.97	GJ	Two Stage Dilute Acid Hydrolysis
58	12	Water	Output	3.42	ton	Two Stage Dilute Acid Hydrolysis
58	13	Glucose	Output	0.12	ton	Two Stage Dilute Acid Hydrolysis
58	14	CO2	Output	7.39	ton	Two Stage Dilute Acid Hydrolysis
58	15	CaSO4	Output	0.38	ton	Two Stage Dilute Acid Hydrolysis
58	16	Na2CO3	Output	0.32	ton	Two Stage Dilute Acid Hydrolysis
58	17	N2	Output	26.67	ton	Two Stage Dilute Acid Hydrolysis
58	18	O2	Output	2.45	ton	Two Stage Dilute Acid Hydrolysis
58	19	Starch	Input	2.77	ton	pX Production from Starch
58	20	HCl	Input	0.062	ton	pX Production from Starch
58	21	NaCl	Input	0.55	ton	pX Production from Starch
58	22	THF	Input	0.11	ton	pX Production from Starch
58	23	H2	Input	0.079	ton	pX Production from Starch
58	24	Ethylene	Input	0.32	ton	pX Production from Starch
58	25	Heptane	Input	0.03	ton	pX Production from Starch
58	26	Cooling water	Input	73.84	GJ	pX Production from Starch
58	27	Steam, natural gas	Input	68.11	GJ	pX Production from Starch
58	28	Electricity	Input	0.94	GJ	pX Production from Starch
58	29	PX	Output	1	ton	pX Production from Starch
58	30	BYPROD1	Output	0.46	ton	pX Production from Starch
58	31	BYPROD2	Output	0.15	ton	pX Production from Starch
58	32	Humins	Output	0.18	ton	pX Production from Starch
58	33	Waste water	Output	1.283	ton	pX Production from Starch
58	34	NaCl	Output	0.55	ton	pX Production from Starch
58	35	HCl	Output	0.062	ton	pX Production from Starch
58	36	THF	Output	0.11	ton	pX Production from Starch
58	37	CO2	Output	0.062	ton	pX Production from Starch
58	38	Formic acid	Output	0.032	ton	pX Production from Starch
58	39
59	1	CO2	Input	1441	kg	Methanol
59	2	H2	Input	203	kg	Methanol
59	3	Electricity	Input	1188000	kJ	Methanol
59	4	Infrastructure	Input	2.35e-07	units	Methanol
59	5	Al2O3	Input	0.183	kg	Methanol
59	6	CuO	Input	1.172	kg	Methanol
59	7	MgO	Input	0.037	kg	Methanol
59	8	ZnO	Input	0.439	kg	Methanol
59	9	Methanol	Output	1000	kg	Methanol
59	10	Water	Output	578	kg	Methanol
59	11	CO2	Output	66	kg	Methanol
59	12	Heat	Output	1400000	kJ	Methanol
59	13	Methanol	Input	5437	kg	Olefins (MTO)
59	14	Electricity	Input	5436735	kJ	Olefins (MTO)
59	15	Infrastructure	Input	6.21e-07	units	Olefins (MTO)
59	16	Zeolite	Input	1.396	kg	Olefins (MTO)
59	17	CO2	Input	145	kg	Olefins (MTO)
59	18	Water	Input	3033	kg	Olefins (MTO)
59	19	Heat	Input	4461384	kJ	Olefins (MTO)
59	20	Ethylene	Output	1000	kg	Olefins (MTO)
59	21	Propylene	Output	800	kg	Olefins (MTO)
59	22	Butene	Output	230	kg	Olefins (MTO)
59	23	Aliphatics	Output	230	kg	Olefins (MTO)
59	24	Methanol	Input	130989	kg	Aromatics (MTA)
59	25	Electricity	Input	24091590	kJ	Aromatics (MTA)
59	26	Infrastructure	Input	1.5e-05	units	Aromatics (MTA)
59	27	Zeolite	Input	33.645	kg	Aromatics (MTA)
59	28	CO2	Input	1500	kg	Aromatics (MTA)
59	29	Water	Input	73787	kg	Aromatics (MTA)
59	30	Heat	Input	182911300	kJ	Aromatics (MTA)
59	31	Benzene	Output	1000	kg	Aromatics (MTA)
59	32	Aliphatics C5+	Output	6418	kg	Aromatics (MTA)
59	33	Ethylbenzene	Output	463	kg	Aromatics (MTA)
59	34	Ethyltoluene	Output	1171	kg	Aromatics (MTA)
59	35	Isopropylbenzene	Output	49	kg	Aromatics (MTA)
59	36	Olefines C2-C4	Output	25674	kg	Aromatics (MTA)
59	37	Tetramethylbenzene	Output	1049	kg	Aromatics (MTA)
59	38	Trimethylbenzene	Output	3439	kg	Aromatics (MTA)
59	39	m-Xylene	Output	5561	kg	Aromatics (MTA)
59	40	o-Xylene	Output	2195	kg	Aromatics (MTA)
59	41	p-Xylene	Output	2439	kg	Aromatics (MTA)
59	42	Toluene	Output	6244	kg	Aromatics (MTA)
59	43	MTA Production Mix	Input	55702	kg	BTX Separation
59	44	Electricity	Input	79506982	kJ	BTX Separation
59	45	Process Water	Input	14482	kg	BTX Separation
59	46	Other	Input	37800	kg	BTX Separation
59	47	Benzene	Output	1000	kg	BTX Separation
59	48	Toluene	Output	6244	kg	BTX Separation
59	49	Xylenes	Output	10658	kg	BTX Separation
59	50
60	1	Cotton straw	Input	2500	kg/h	biorefinery process	Sub 1
60	2	Fertilizer	Input	61	kg/h	biorefinery process	Sub 1
60	3	Air	Input	3697	kg/h	biorefinery process	Sub 1
60	4	Sulfuric acid (98 wt%)	Input	77	kg/h	biorefinery process	Sub 1
60	5	Process water	Input	1323	kg/h	biorefinery process	Sub 1
60	6	Diesel for Feedstock collection	Input	550	MJ/h	biorefinery process	Sub 1
60	7	Electricity	Input	2889	MJ/h	biorefinery process	Sub 1
	8
60	9	CO2 (biogenic)	Output	1542	kg/h	biorefinery process	Sub 1
60	10	N2	Output	2847	kg/h	biorefinery process	Sub 1
60	11	Steam	Output	315	kg/h	biorefinery process	Sub 1
60	12	Ash	Output	143	kg/h	biorefinery process	Sub 1
60	13	Process water	Input	1527	kg h	biorefinery process	Sub 2
60	14	Activated carbon	Input	3	kg h	biorefinery process	Sub 2
60	15	Calcium hydroxide	Input	340	kg h	biorefinery process	Sub 2
60	16	Hydrochloric acid (32 wt%)	Input	3	kg h	biorefinery process	Sub 2
60	17	Ethyl acetate	Input	20	kg h	biorefinery process	Sub 2
60	18	Electricity	Input	598	MJ h	biorefinery process	Sub 2
60	19	Steam (6 bar)	Input	861	MJ h	biorefinery process	Sub 2
60	20	Cooling water from river (20 Â°C)	Input	4.3	mÂ³ h	biorefinery process	Sub 2
60	21	Waste liquid	Output	2795	kg h	biorefinery process	Sub 2
60	22	Solid waste	Output	429	kg h	biorefinery process	Sub 2
60	23	Levoglucosan	Output	369	kg h	biorefinery process	Sub 2
60	24	Process water	Input	59	kg h[-]	biorefinery process	Sub 3
60	25	Sodium hydroxide	Input	35	kg h[-]	biorefinery process	Sub 3
60	26	Phenol	Input	172	kg h[-]	biorefinery process	Sub 3
60	27	Formaldehyde (37 wt%)	Input	604	kg h[-]	biorefinery process	Sub 3
60	28	Electricity	Input	72	MJ h[-]	biorefinery process	Sub 3
60	29	Steam (6 bar)	Input	132	MJ h[-]	biorefinery process	Sub 3
60	30	Renewable phenol resin	Output	1045	kg h[-]	biorefinery process	Sub 3
60	31	Process water	Input	0	kg h	biorefinery process	Sub 4
60	32	Calcium oxide	Input	24	kg h	biorefinery process	Sub 4
60	33	Methanol	Input	142	kg h	biorefinery process	Sub 4
60	34	Electricity	Input	367	MJ h	biorefinery process	Sub 4
60	35	Steam (6 bar)	Input	2850	MJ h	biorefinery process	Sub 4
60	36	Cooling water from river (20 Â°C)	Input	34	mÂ³ h	biorefinery process	Sub 4
60	37	Waste liquid	Output	740	kg h	biorefinery process	Sub 4
60	38	Solid waste	Output	264	kg h	biorefinery process	Sub 4
60	39	Deicer	Output	37	kg h	biorefinery process	Sub 4
63	1	Biomass	Input	6.74	kg	Biomass-Derived FDCA
63	2	THF	Input	0.06	kg	Biomass-Derived FDCA
63	3	H2SO4	Input	0.21	kg	Biomass-Derived FDCA
63	4	Heavy oil	Input	0.03	kg	Biomass-Derived FDCA
63	5	Ca(OH)2	Input	0.07	kg	Biomass-Derived FDCA
63	6	NaCl	Input	0.05	kg	Biomass-Derived FDCA
63	7	H2	Input	0.07	kg	Biomass-Derived FDCA
63	8	O2	Input	1.43	kg	Biomass-Derived FDCA
63	9	Heat (MJ); natural gas	Input	1.42	MJ	Biomass-Derived FDCA
63	10	Electricity (MJ); natural gas	Input	7.02	MJ	Biomass-Derived FDCA
63	11	FDCA	Output	1	kg	Biomass-Derived FDCA
63	12	1,5-PDO	Output	0.65	kg	Biomass-Derived FDCA
63	13	Activated carbon	Output	0.63	kg	Biomass-Derived FDCA
63	14	Ash	Output	0.68	kg	Biomass-Derived FDCA
63	15	CO2	Output	1.52	kg	Biomass-Derived FDCA
63	16	Gypsum	Output	0.17	kg	Biomass-Derived FDCA
63	17	Coke	Output	0.06	kg	Biomass-Derived FDCA
63	18	H2O	Output	0.001	m³	Biomass-Derived FDCA
63	19	Steam	Output	0.64	kg	Biomass-Derived FDCA
63	20	H2O	Output	0.43	kg	Biomass-Derived FDCA
63	21
63	22	H2O	Input	0.00034	m³	Biomass-Derived TPA
63	23	AA	Input	0.05	kg	Biomass-Derived TPA
63	24
63	25	Electricity	Input	0.47	kWh	Biomass-Derived TPA
63	26	Heat (natural gas)	Input	0.46	MJ	Biomass-Derived TPA
63	27	Heat (other than natural gas)	Input	1.2	MJ	Biomass-Derived TPA
63	28	N2	Input	0.049	kg	Biomass-Derived TPA
63	29	NaOH	Input	0.0015	kg	Biomass-Derived TPA
63	30
63	31
63	32
63	33	TPA	Output	1	kg	Biomass-Derived TPA
63	34	Hydrocarbons	Output	0.00038	kg	Biomass-Derived TPA
63	35	NMVOC	Output	0.00011	kg	Biomass-Derived TPA
63	36	Particulates (<2.5 μm)	Output	2e-05	kg	Biomass-Derived TPA
63	37	Particulates (>10 μm)	Output	3e-05	kg	Biomass-Derived TPA
63	38	Particulates (>2.5 μm, <10 μm)	Output	4e-05	kg	Biomass-Derived TPA
63	39	H2O	Output	0.00022	m³	Biomass-Derived TPA
63	40	Incineration residue	Output	0.006	kg	Biomass-Derived TPA
63	41	Hazardous waste	Output	0.0002	kg	Biomass-Derived TPA

## Sheet: LCI-data-record
ID	Author, Year	Title	Table name	Table type	Human intervention?	Table classification time (s)	Build vectorDB	Processing Time (s)	Human intervention time (S)	Note	Precision	Recall	F1	Total rows	Note
1	Liu et al. 2020	Comprehensive analysis of environmental impacts and energy consumption of biomass-to-methanol and coal-to-methanol via life cycle assessment	Table 4 Input and output data of each unit of the CTM and BTM processes	Hierarchical table	Yes	14.38		138.57	6 times of manual input	Manually input 'BTW' pathway name, 6 times of manual input activity name	0.9832	0.983	0.9831	68
2	Renó et al. 2011	A LCA (life cycle assessment) of the methanol production from sugarcane bagasse	Table 3 Inputs data of methanol production referred to 1 kg of methanol, Table 4 Outputs data of methanol production referred to 1 kg of methanol	Hierarchical table	No	18.76	19.23	124.25			0.889	0.7024	0.7861	79	Issue of decimal point (e.g., 10-4 cannot be extracted)
3	Zhu et al. 2022	LCA comparison analysis for two types of H2 carriers: Methanol and ammonia	Not provide
4	Galusnyak et al. 2021	Life Cycle Assessment of Bio-methanol Derived from Various Raw-materials	Not provide
5	Galusnyak et al. 2023	From Secondary Biomass to Bio-Methanol through CONVERGE Technology: An Environmental Analysis	Not provide
6	Fózer et al. 2021	Sustainability assessment of biomethanol production via hydrothermal gasification supported by artificial neural network	Table 4 Life cycle inventory. Functional unit: 1 t of produced biomethanol.	Flat table with multi-level row groups	Yes	5.85	20.04	77.93	1 times of manual input	Manually input 'Non-catalytic HTG' pathway name (1 time)	1	1	1	42
7	Khoo et al. 2016	Bio-chemicals from lignocellulose feedstock: sustainability, LCA and the green conundrum	Not provide
8	Choe et al. 2022	Techno-economic and environmental assessments for sustainable bio-methanol production as landfill gas valorization	Not provide
9	Budsberg et al. 2020	Production routes to bio-acetic acid: life cycle assessment	Table 5 Major inputs and outputs from the biorefinery of each scenario	Flat table with two subtables	Yes	3.07	14.57	75.35	3 times of manual input	Manually input 'EAX LE', 'ADX OC', 'ADX LE' pathway name (3 time)	1	1	1	63
10	Gadkari et al. 2021	Microbial electrosynthesis: is it sustainable for bioproduction of acetic acid?	Not provide
11	Akmalina and Pawitra. (2020)	Life cycle assessment of ethylene production from empty fruit bunch	TABLE 1 Main inventory data (per kg product) for ethanol and ethylene production	Hierarchical table	No	3.41	10.7	37.88			0.9822	0.9905	0.9863	39	LLM can understand the data structure
12	Yang et al. (2018)	Manufacturing Ethylene from Wet Shale Gas and Biomass: Comparative Technoeconomic Analysis and Environmental Life Cycle Assessment	Not provide
13	Ghanta et al. (2014)	Environmental impacts of ethylene production from diverse feedstocks and energy sources	Not provide
14	Liptow et al. (2015)	Life cycle assessment of biomass-based ethylene production in Sweden — is gasification or fermentation the environmentally preferable route?	Not provide
15	Khoo et al. (2020)	LCA of electrochemical reduction of CO2 to ethylene	Table 1 Input-output information for small-scale experimental setup; Table 2 The input and output information for the large-scale model.	Flat table with two subtables	No	3.22	33.29	63.17			0.8225	0.8247	0.8241	25	Missing several lines
16	Alonso-Fariñas et al. 2018	Environmental assessment of thermo-chemical processes for bio-ethylene production in comparison with bio-chemical and fossil-based ethylene	Table 1 Life cycle inventory data for annual production of 1 Mt (500 MWth) of poplar (wet); Table 2 Life cycle inventory data for bio-ethylene production expressed per tonne of ethylene produced.	Hierarchical table	Yes	14.82	22.85	84.99	2 times	Manually input 'Case 2: Indirect ethanol dehydration', 'Case 3: Dimethyl ether to olefins' pathway name (2 time)	0.914	0.9152	0.9147	117	Missing several lines (fail to detect pathway or activity), complex table format
17	Hong et al. 2014	Life cycle assessment of corn- and cassava-based ethylene production	Not provide
18	Oliveira et al. 2019	Bio-ethylene from sugarcane as a competitiveness strategy for the Brazilian chemical industry	Not provide
19	Xu et al. 2021	Comparative Life Cycle Assessment of Energy Consumption, Pollutant Emission, and Cost Analysis of Coal/Oil/Biomass to Ethylene Glycol	Table 2. Life Cycle Energy Consumption Inventory Data of the CtEG Route for Producing 1 ton EG; Table 3. Life Cycle Energy Consumption Inventory Data of the OtEG Route for Producing 1 ton EG; Table 4. Life Cycle Energy Consumption Inventory Data of the BtEG Route for Producing 1 ton EG	Hierarchical table	No	10.46	51.63	138.2			0.7586	0.7497	0.7544	84	issue of decimal point, complex table
20	Zhao et al. 2021	Advancing development of biochemicals through the comprehensive evaluation of bio-ethylene glycol	Not provide
21	Tähkämö et al. 2022	Life cycle assessment of renewable liquid hydrocarbons, propylene, and polypropylene derived from bio-based waste and residues: Evaluation of climate change impacts and abiotic resource depletion potential	Table 1 LCI data of the palm oil refining process, Table 2 LCI data description of NEXBTL process, Table 6 Life cycle inventory of FF rendering process	Hierarchical table	No	6.2	24.56	50.64			0.6905	0.6722	0.6818	29
22	Moretti et al. 2020	Environmental life cycle assessment of polypropylene made from used cooking oil	Table 2 Input and output data per 1 kg of bio-based naphtha from UCO (NEXBTL unit process-hydrotreatment plus pre-treatment); Table 3 Selected inventory data of the steam cracking process per 1 kg of bio-based propylene made from bio-based Naphtha.	Flat table with multi-level row groups											Cannot extract, data+text (structure issue)
23	Kikuchi et al. 2017	Greenhouse gas emissions and socioeconomic effects of biomass-derived products based on structural path and life cycle analyses: A case study of polyethylene and polypropylene in Japan	Table 3 Process inventory data based on process simulation of propylene production from ethylene obtained from bioethanol dehydration; Table 4 Process inventory data based on process simulation of methanol production from synthesis gas for olefin production.	Flat table with multi-level row groups	No	15.07	33.91	27.54			1	1	1	23
24	Nachtergaele et al. 2019	Environmental sustainability assessment of renewables-based propylene glycol at full industrial scale production	Not provide
25	Gonzalez-Garay et al. 2017	High-Value Propylene Glycol from Low-Value Biodiesel Glycerol: A Techno-Economic and Environmental Assessment under Uncertainty	Table 1. Overall Mass and Energy Balances for the Production of 1 kg of Propylene Glycola	Hierarchical table	Yes	3.61	15.81	51	3 times	Manual input pathway name	0.8301	0.8438	0.8366	40	Not fully understand the structure
26	Gong and You. 2015	Value-Added Chemicals from Microalgae: Greener, More Economical, or Both?	Not provide
27	Sun et al. 2022	Hydrogenolysis of Glycerol to Propylene Glycol: Energy, Tech-Economic, and Environmental Studies	Not provide
28	Liew et al. 2022	Carbon-negative production of acetone and isopropanol by gas fermentation at industrial pilot scale	Not provide
29	Adom et al. 2014	Life-Cycle Fossil Energy Consumption and Greenhouse Gas Emissions of Bioderived Chemicals and Their Conventional Counterparts	Not provide
30	Bhagwat et al. 2021	Sustainable Production of Acrylic Acid via 3-Hydroxypropionic Acid from Lignocellulosic Biomass	Not provide
31	Cespi et al. 2015	Glycerol as feedstock in the synthesis of chemicals: a life cycle analysis for acrolein production	Not provide
32	Tripodi et al. 2018	Acetonitrile from Bioethanol Ammoxidation: Process Design from the Grass-Roots and Life Cycle Analysis	Table 2. Overall Plant Feeds and Products Balances Material	Flat table	No	3.06	22.96	15.05			0.9802	0.9736	0.9769	12
33	Ögmundarson et al. 2020	Environmental hotspots of lactic acid production systems	Not provide
34	Li et al. 2021	Sustainable Lactic Acid Production from Lignocellulosic Biomass	Not provide
35	Morales et al. 2015	Environmental and economic assessment of lactic acid production from glycerol using cascade bio- and chemocatalysis	Table 2 LCI data for the biocatalytic production of DHA from GLY; Table 3 LCI data for the chemocatalytic production of LA from DHA in water; Table 4 LCI data for the chemocatalytic production of LA from DHA in methanol	Flat table	No	3.29	11.57	47.17			1	1	1	26
36	Munagala et al. 2021	Life cycle and economic assessment of sugarcane bagasse valorization to lactic acid	Table B1 Process data for the upstream stages of LA production, developed at the Vasantdada Sugar Institute (VSI).	Flat table with multi-level row groups	No	3.6	13.57	21.64			1	1	1	34
37	Daful et al. 2016	Environmental impact assessment of lignocellulosic lactic acid production: Integrated with existing sugar mills	Not provide
38	Pachón et al. 2020	Conversion of vine shoots into bioethanol and chemicals: Prospective LCA of biorefinery concept	Table 2 Mass flow rate (kg/h) of the streams entering and leaving the process areas of the simulated plants producing lactic acid (VS LA) and lactic acid and furfural (VS LF) from vine shoots. Simulation results using Aspen Plus.	Hierarchical table	Yes	8.3	22.51	46.25	2 times	Manual input pathway name	0.8605	0.8544	0.8573	84
39	Lee et al. 2021	Life cycle analysis of renewable natural gas and lactic acid production from waste feedstocks	Table 2 Mass and energy inputs and outputs of a) biogas production and b) LA production (per dry kg of waste feedstock)	Hierarchical table	No	9.4	34.37	33.93			1	1	1	22
40	Mandegari et al. 2017	Multi-criteria analysis of a biorefinery for co-production of lactic acid and ethanol from sugarcane lignocellulose	Not provide
41	Ding et al. 2023	Relay photo/thermal catalysis enables efficient cascade upgrading of sugars to lactic acid: Mechanism study and life cycle assessment	Not provide
42	Meghana et al. 2021	Valorization of sugarcane bagasse to lactic acid: Life cycle assessment and Techno-economic evaluation in Indian scenario	Not provide
43	Lopes et al. 2019	Techno-economic and life-cycle assessments of small-scale biorefineries for isobutene and xylo-oligosaccharides production: a comparative study in Portugal and Chile	Table 8. Mass and energy balances obtained from Aspen Plus.	/											Cannot extract, data+text (structure issue)
44	Fazeni-Fraisl and Lindorfer. 2022	Comparative life cycle assessment of first- and second-generation bio-isobutene as a drop-in substitute for fossil isobutene	Table 4. Life cycle inventory for the production of 1 t of bio-based IBN based on first-generation sugars; Table 5. Life cycle inventory for the production of 1 t IBN based on second-generation sugars.	/											Cannot extract, data+text (structure issue)
45	Berger et al. 2022	The techno-economic feasibility and carbon footprint of recycling and electrolysing CO2 emissions into ethanol and syngas in an isobutene biorefinery	Not provide
46	Cabrera Camacho et al. 2020	Techno-economic and Life-Cycle Assessment of One-Step Production of 1,3-Butadiene from Bioethanol Using Reaction Data under Industrial Operating Conditions	Not provide
47	Cabrera Camacho et al. 2022	Assessing the economic and environmental sustainability of bio-olefins: The case of 1,3-butadiene production from bioethanol	Table 3 Results of the overall mass and energy balances for the one- and two-step process scenarios.	Hierarchical table	Yes	14.4	29.34	12.44		Manual input pathway name	1	1	1	14
48	Shylesh et al. 2016	From Sugars to Wheels: The Conversion of Ethanol to 1,3-Butadiene over Metal-Promoted Magnesia-Silicate Catalysts	Not provide
49	Farzad et al. 2017	Integrated techno-economic and environmental analysis of butadiene production from biomass	Table 2 Overall mass and energy balance of the studied scenarios.	Hierarchical table	No	5.21	22.45	44			0.9247	0.9255	0.9249	28
50	Cespi et al. 2016	Butadiene from biomass, a life cycle perspective to address sustainability in the chemical industry	Not provide
51	Rodgers et al. 2022	Renewable butadiene: A case for hybrid processing via bio- and chemo-catalysis	Not provide
52	Sadhukhan et al. 2019	Novel macroalgae (seaweed) biorefinery systems for integrated chemical, protein, salt, nutrient and mineral extractions and environmental protection by green synthesis and life cycle sustainability assessments	Not provide
53	Isoni et al. 2018	Biomass to levulinic acid: A techno-economic analysis and sustainability of biorefinery processes in Southeast Asia	Not provide
54	Hafyan et al. 2020	Sustainability assessment of levulinic acid and succinic acid production from empty fruit bunch	Not provide
55	Thompson et al. 2021	Comparison of pyrolysis and hydrolysis processes for furfural production from sugar beet pulp: A case study in southern Idaho, USA	Not provide
56	Luo et al. 2021	Comparative Study of Different Hybrid Life Cycle Assessment Methodologies Applied to Biomass-based Chemical Production	Not provide
57	Athaley et al. 2019	Techno-economic and life cycle analysis of different types of hydrolysis process for the production of p-Xylene	Not provide
58	Lin et al. 2015	Life Cycle Assessment of Biobased p-Xylene Production	Table 1. Life Cycle Inventory of Two Stage Dilute AcidHydrolysis, Table 2. Inventory Analysis of pX Production from Starch	Hierarchical table	No	3.19	33.91	33.28			0.9705	0.9673	0.9689	39
59	Rosental et al. 2020	Life Cycle Assessment of Carbon Capture and Utilization for the Production of Large Volume Organic Chemicals	TABLE 2 | Input and output metrics of chemical synthesis modules producing 1,000 kg of the respective product	Hierarchical table	Yes	5.05	20.2	52	4 times	Manual input pathway name	0.9732	0.9724	0.9724	50
60	Zheng et al. 2018	Life-cycle assessment and techno-economic analysis of the utilization of bio-oil components for the production of three chemicals	Table 1 LCI data for the biore ï¬nery process Item Sub 1 Sub 2 Sub 3 Sub 4 Units Materials Cotton straw 2500	Flat table with multi-level row groups	No	3.33	14.88	49.45			0.9435	0.9393	0.9413	39
61	Perederic et al. 2020	Life Cycle Analysis of Phenol - Formaldehyde Resins Substituted with Lignin	Not provide
62	Patel et al. 2022	Technoeconomic and Life-Cycle Assessment for Electrocatalytic Production of Furandicarboxylic Acid	Not provide
63	Kim et al. 2020	Sustainable Production of Bioplastics from Lignocellulosic Biomass: Technoeconomic Analysis and Life-Cycle Assessment	Table 2. Process Input/Output Values for Biomass-Derived FDCA and Petroleum-Derived TPA Productions	Hierarchical table	Yes	7.33	57.97	37.12	1 times	Manual input pathway name	0.8138	0.8229	0.8182	41	data location wrong
64	Kim et al. 2022	Integrative technical, economic, and environmental sustainability analysis for the development process of biomass-derived 2,5-furandicarboxylic acid	Not provide
65	Isola et al. 2017	Life cycle assessment of photodegradable polymeric material derived from renewable bioresources	Not provide

## Sheet: Groun-truth (Neo4j)
No.	Question	Reference result	GraphCypherQAChain	Can it be retrieved successfully?	GraphCypherQAChain with similarity search	Can it be retrieved successfully?
1	How many reference products are in the Chemical sector? List all of them.	Methanol, formic acid, ethylene, ethylene oxide, ethylene glycol, acetic acid, propylene, propylene oxide, propylene glycol, lactic acid, acrylic acid, acrolein, acrylonitrile, succinic acid, butanol, 1,3-butadiene, itaconic acid, xylitol, furfural, levulinic acid, FDCA, citric acid, sorbitol, and p-xylene.	There are 24 reference products in the Chemical sector. They are p-Xylene, Sorbitol, Citric acid, FDCA, Levulinic acid, Furfural, Xylitol, Itaconic acid, 1,3-Butadiene, Butanol, Succinic acid, Acrylonitrile, Acrolein, Acrylic acid, Lactic acid, Propylene glycol, Propylene oxide, Propylene, Acetic acid, Ethylene glycol, Ethylene oxide, Ethylene, Formic acid, and Methanol.	Yes	There are 24 reference products in the Chemical sector. They are p-Xylene, Sorbitol, Citric acid, FDCA, Levulinic acid, Furfural, Xylitol, Itaconic acid, 1,3-Butadiene, Butanol, Succinic acid, Acrylonitrile, Acrolein, Acrylic acid, Lactic acid, Propylene glycol, Propylene oxide, Propylene, Acetic acid, Ethylene glycol, Ethylene oxide, Ethylene, Formic acid, and Methanol.	Yes
2	What is the Global warming potential results with unit for methanol production according to the 'CML 2001' method?"	According to the CML 2001 method, the global warming potential results for methanol production are: coal gasification technology (CGT) – 17,700 kg CO₂-eq/t, coal coking technology (CCT) – 2,890 kg CO₂-eq/t, coke oven gas (COG) route – 1,200.8 kg CO₂-eq/t, coal route – 1,643.5 kg CO₂-eq/t, natural gas route – 915.4 kg CO₂-eq/t, coal-CH₃OH – 3.09 kg CO₂-eq/kg, NG-CH₃OH – 0.84 kg CO₂-eq/kg, PV/CCU-C…	I don't know the answer.	No	Global warming potential: 17700.0 kg CO₂-eq/t, 2.284 kg CO₂-eq/kg, 1.04 kg CO₂-eq/kg, 0.84 kg CO₂-eq/kg, 3.09 kg CO₂-eq/kg, 915.4 kg CO₂-eq/t, 1643.5 kg CO₂-eq/t, 1200.8 kg CO₂-eq/t, and 2890.0 kg CO₂-eq/t.	Yes
3	List all flows associated with the Methanol production through the coal gasification pathway.	In the coal gasification to methanol (CGTM) pathway, producing 1 tonne of methanol requires 1.23 t of synthetic gas, 825 kWh of electricity, 1 t of NaOH (10%), and 14.2 kg of water, while generating 0.07 t of flue gas and 0.266 t of effluents as outputs.	I don't know the answer.	No	The flows associated with methanol production through the Coal Gasification to MeOH (CGTM) pathway are as follows: output flows include 0.266 t of effluents, 0.07 t of flue gas, and 1.0 t of methanol; input flows include 14.2 kg of water, 1.0 t of 10% NaOH, 825.0 kWh of electricity, and 1.23 t of synthetic gas.	Yes
4	List all papers published in 2018 for the FDCA production.	Environmental sustainability assessment of HMF and FDCA production from lignocellutosic biomass through life cycle assessment (LCA)	I don't know the answer.	No	The paper titled "Environmental sustainability assessment of HMF and FDCA production from lignocellutosic biomass through life cycle assessment (LCA)".	Yes
5	List all papers with geographic location in China.	The dataset contains the following papers in China: Carbon footprint evaluation of coal-to-methanol chain with the hierarchical attribution management and life cycle assessment; Comparative environmental assessment of methanol production technologies: A cradle-to-gate life cycle analysis; Life-cycle assessment for coal-based methanol production in China; Comprehensive analysis of environmental im…	"Life cycle assessment of primary energy demand and greenhouse gas (GHG) emissions of four propylene production pathways in China" and "Environmental Burdens of China's Propylene manufacturing: Comparative life-cycle assessment and scenario analysis" are papers with a geographic location in China.	Yes	Paper_title: Techno-economic analysis and environmental impact assessment of citric acid production through different recovery methods, Renewable butadiene: A case for hybrid processing via bio- and chemo-catalysis, Life cycle assessment of primary energy demand and greenhouse gas (GHG) emissions of four propylene production pathways in China, Environmental burdens of China's propylene manufactur…	Yes
6	Which activities produce methanol and in which geography?	The methanol production locations in the dataset are predominantly in China, with other reported sites including Southern Brazil, Spain, Republic of Korea, Western Europe (Germany), Poland, United States, East Java (Indonesia), Japan, European Union/Europe, Xinjiang Autonomous Region (China), Brazil, Northern Sweden and Italy, and Korea, while several entries do not specify a location	I don't know the answer.	No	Methanol production activities are located in China, Southern Brazil, and some locations that are not mentioned.	Yes
7	List all flows associated with the ethylene production through the CO2-based pathway.	In the CO₂-to-ethylene (cascade conversion) pathway, producing 1 kg of ethylene requires 3.14 kg of CO₂ feed, 0.002 kg of electrolyte, 3.9 kg of water makeup, and 163 kg of electricity, with ethylene as the sole output at 1 kg.	I don't know the answer.	No	The flows associated with the Ethylene production through the CO2-to-ethylene (cascade conversion) pathway are as follows: Ethylene (1.0 kg) as an output flow, and the input flows include Electricity (163.0 kg), Water makeup (3.9 kg), Electrolute (0.002 kg), and CO2 feed (3.14 kg).	Yes
8	What are the Global Warming Potential (GWP) result values for methanol, using kg CO₂-eq/kg as the indicator unit?	Here are all the Global Warming Potential (GWP) results for methanol using kg CO₂-eq/kg as the indicator unit: 0.809, 0.525, 0.23, 19.5, 8.74, 17.7, 2.9, 2.28, 10.7, 64.4, 87.53, 0.81, 1.5, 1.7, 3.09, 0.84, 1.04, 7.19, 6.21, 5.27, 1.32, 76.85, 339, 2.284, 2.36, 0.835, 0.605.	I don't know the answer.	No	The LCIA result values for Methanol, using kg CO2-eq/kg as the indicator unit for Global warming potential, are 0.605, 0.835, 2.36, 2.284, 339.0, 76.85, 1.32, 5.27, 6.21, and 7.19.	Yes
9	List all papers published in 2019 about Formic acid.	"From Laboratory to Industrial Scale: A Prospective LCA for Electrochemical Reduction of CO2 to Formic Acid" and "System-level analysis and life cycle assessment of CO2 and fossil-based formic acid strategies"	I don't know the answer.	No	I don't know the answer.	No
10	How many papers use 1 kg as the functional unit?	A total of 63 papers.	63 papers use 1 kg as the functional unit.	Yes	63 papers use 1 kg as the functional unit.	Yes
11	List all input and output data of ethylene production through the wood fermentation pathway.	In the wood fermentation pathway for ethylene production, the inputs are 1.7 t of pure ethanol, 0.2 MWel of electricity, 0.7 MW (HHV) of external fuel, and 1.2 MW of MP steam. The outputs are 1 t of polymer-grade ethylene, along with 408,000 g of fossil CO₂, 1,280 g of NOx, 17.1 g of SO₂, 0.1 g of HC, 78.7 g of CO, 245.6 g of CH₄, 64,400 g of biogenic CO₂, 5,970 g of ethylene (other stream), and …	I don't know the answer.	No	Ethan (1.9 g), Ethylene (5970.0 g), Biogenic CO2 (64400.0 g), CH4 (245.6 g), CO (78.7 g), HC (0.1 g), SO2 (17.1 g), NOx (1280.0 g), Fossil CO2 (408000.0 g), Ethylene (polymergrade) (1.0 t) are output data of Ethylene production through the Wood Fermentation pathway.	Yes
12	How many papers use Cradle-to-grave as a system boundary?	5 papers	5 papers use Cradle-to-grave as a system boundary.	Yes	5 papers use Cradle-to-grave as a system boundary.	Yes
13	List all impact indicator values for the paper 'Life-cycle assessment for coal-based methanol production in China'.	Coal gasification technology (CGT): 17700 kg CO2-eq/t; Coal coking technology (CCT): 2890 kg CO2-eq/t.	I don't know the answer.	No	I don't know the answer.	No
14	What are the system boundary, functional unit, and geographic location for the paper ‘Life-cycle assessment for coal-based methanol production in China’?	System boundary: cradle-to-gate, functional unit: 1.0 tonne of methanol, and geographic location: China.	The system boundary is cradle-to-gate, the functional unit is 1.0 tonne of methanol, and the geographic location is China.	Yes	The system boundary is cradle-to-gate, the functional unit is 1.0 tonne of methanol, and the geographic location is China.	Yes
15	What the authors and doi for the paper ‘Life-cycle assessment for coal-based methanol production in China’?	Authors: Li et al; DOI: https://doi.org/10.1016/j.jclepro.2018.04.051	The authors for the paper 'Life-cycle assessment for coal-based methanol production in China' are listed as 'Life-cycle assessment for coal-based methanol production in China', and the DOI is https://doi.org/10.1016/j.jclepro.2018.04.051.	Yes	Li et al. are the authors of the paper, and the DOI is https://doi.org/10.1016/j.jclepro.2018.04.051.	Yes
16	List all papers that use 1 kg of lactic acid as a functional unit.	The dataset contains the following papers: Life cycle analysis of renewable natural gas and lactic acid production from waste feedstocks; Environmental hotspots of lactic acid production systems; Biological valorization of natural gas for the production of lactic acid: Techno-economic analysis and life cycle assessment; Relay photo/thermal catalysis enables efficient cascade upgrading of sugars t…	[{'paper_title': 'Life cycle analysis of renewable natural gas and lactic acid production from waste feedstocks'}, {'paper_title': 'Environmental hotspots of lactic acid production systems'}, {'paper_title': 'Biological valorization of natural gas for the production of lactic acid: Techno-economic analysis and life cycle assessment'}, {'paper_title': 'Relay photo/thermal catalysis enables efficie…	Yes	Paper_title: Life cycle analysis of renewable natural gas and lactic acid production from waste feedstocks, Environmental hotspots of lactic acid production systems, Biological valorization of natural gas for the production of lactic acid: techno-economic analysis and life cycle assessment, Relay photo/thermal catalysis enables efficient cascade upgrading of sugars to lactic acid: mechanism study…	Yes
17	Which impact indicator values are assessed using the CML2001 method for Acrylic acid?	['Case 1: 3877.00 kg CO2-eq./tonne', 'Case 2: 5525.0 kg CO2-eq./tonne', 'Case 3: 5528.65 kg CO2-eq./tonne', 'Case 4: 4756.04 kg CO2-eq./tonne', 'Case 5: 4648.08 kg CO2-eq./tonne', 'Case 6: 1094.5 kg CO2-eq./tonne', 'Case 7: 1790.43 kg CO2-eq./tonne', 'Case 8: 2486.05 kg CO2-eq./tonne', 'Case 9: 3181.67 kg CO2-eq./tonne', 'Case 10: 1673.45 kg CO2-eq./tonne']	I don't know the answer.	No	I don't know the answer.	No
18	What are the impact indicator values and units for xylitol?	The impact indicator values for xylitol are 1.807, 1.385, 8.68, 3.83, 3.59, and 38.6 kg CO₂-eq/kg for 1 kg of xylitol; 14.548, 3.59, 38.6, and 10.7783 kg CO₂-eq/kg for 1 t of xylitol; and 1.476 and 5.288 kg CO₂-eq/kg for 1 g of xylitol.	I don't know the answer.	No	Global warming potential: 5.288 kg CO₂-eq/kg, 1.476 kg CO₂-eq/kg, 5.288 kg CO₂-eq/kg, 1.476 kg CO₂-eq/kg, 10.7783 kg CO₂-eq/kg, 38.6 kg CO₂-eq/kg, 3.59 kg CO₂-eq/kg, 14.548 kg CO₂-eq/kg, 38.6 kg CO₂-eq/kg, 3.59 kg CO₂-eq/kg.	Yes
19	List all inventory data of Lactic acid production through the Sugarcane bagasse-based pathway.	For the Sugarcane bagasse-based pathway of the lactic acid production, the inputs include 0.59 kg of H₂SO₄, 1.31 kg of calcium lactate, and 16 kg of fermented broth. The outputs are 1.08 kg of lactic acid, 16 kg of water, and 0.82 kg of gypsum.	For the Sugarcane bagasse-based pathway of the lactic acid production, the inputs include 0.59 kg of H₂SO₄, 1.31 kg of calcium lactate, and 16 kg of fermented broth. The outputs are 1.08 kg of lactic acid, 16 kg of water, and 0.82 kg of gypsum.	Yes	For the Sugarcane bagasse-based pathway of the lactic acid production, the inputs include 0.59 kg of H₂SO₄, 1.31 kg of calcium lactate, and 16 kg of fermented broth. The outputs are 1.08 kg of lactic acid, 16 kg of water, and 0.82 kg of gypsum.	Yes
20	How many papers are in the database?	There are 107 papers in the database.	There are 107 papers in the database.	Yes	There are 107 papers in the database.	Yes
21	How many papers are there on methanol and ethylene in the ‘Chemical’ sector, and what is their total number for each?	Methanol: 17 papers; Ethylene: 7 papers	I don't know the answer.	No	There are 17 papers on Methanol and 7 papers on Ethylene in the 'Chemical' sector.	Yes
22	Which activities produce Succinic acid and in which geography?	Succinic acid production activities are reported in Louisiana, USA, Campania Region, Southern Italy, Brazil (four cases), UK, France, and India, with one case where the geographic location is not mentioned.	Succinic acid production occurs in the UK, Brazil, Campania Region in Southern Italy, and Louisiana, USA.	Yes	Succinic acid production activities are located in Louisiana, USA; Campania Region, Southern Italy; Brazil; UK; and an unspecified location.	Yes
23	Which paper reports the lowest Global Warming Potential (GWP) result for methanol production using kg CO₂-eq/kg as the indicator unit?	"Comparative environmental assessment of methanol production technologies: A cradle-to-gate life cycle analysis" reports the lowest Global warming potential result: 0.23 kg CO₂-eq/kg	I don't know the answer.	No	The paper "Comparative environmental assessment of methanol production technologies: A cradle-to-gate life cycle analysis" reports the lowest Global warming potential result for Methanol production with a value of 0.23 kg CO2-eq/kg.	No
24	List all inventory data of 1,3-Butadiene production through the Naphtha cracking pathway.	The production of 1 t of 1,3-butadiene via the naphtha cracking pathway requires 22.2 t of naphtha and 200 GJ of energy, yielding co-products including 7 t of ethylene, 3.22 t of propylene, 2.89 t of aromatics and C₄, 3 t of CH₄, 0.222 t of H₂, 2.44 t of other products, 2.44 t of losses and blackflows, and 13.3 t of CO₂.	The inventory data for 1,3-Butadiene production through the Naphtha cracking pathway includes the following output flows: 1,3-BD (1.0 t), CO2 (13.3 t), Losses&blackflows (2.44 t), Other (2.44 t), H2 (0.222 t), CH4 (3.0 t), Aromatics and C4 (2.89 t), Propylene (3.22 t), and Ethylene (7.0 t). Additionally, there is an input flow of Energy amounting to 200.0 GJ.	Yes	The inventory data for 1,3-Butadiene production through the Naphtha cracking pathway includes the following output flows: 1,3-BD (1.0 t), CO2 (13.3 t), Losses&blackflows (2.44 t), Other (2.44 t), H2 (0.222 t), CH4 (3.0 t), Aromatics and C4 (2.89 t), Propylene (3.22 t), and Ethylene (7.0 t). Additionally, there is an input flow of Energy amounting to 200.0 GJ.	Yes
25	List all input and output data of the FDCA production via the Electrochemical production pathway. Give me the reference paper title for the data.	The production of 100 t of FDCA via the electrochemical pathway requires 270.48 kg of KOH, 504,884.5 kg and 4,763.88 kg of water, 98.77 kg of Co₆.₄Ni, 159,840 kWh of electricity, 85,073.6 kg of HMF, and 495.427 kg of sulphuric acid, yielding 3,946.4 kg of hydrogen and 489,644 kg of wastewater as co-products. Reference paper: 'Technoeconomic and Life-Cycle Assessment for Electrocatalytic Productio…	The input and output data for FDCA production via the electrochemical production pathway are as follows: inputs include 4,763.88 kg of water, 495.427 kg of sulphuric acid, 85,073.6 kg of HMF, 159,840.0 kWh of electricity, 98.77 kg of Co6.4Ni, 504,884.5 kg of water, and 270.48 kg of KOH. Outputs include 489,644.0 kg of wastewater, 3,946.4 kg of hydrogen, and 100.0 t of FDCA. The reference paper ti…	Yes	The paper titled "Technoeconomic and Life-Cycle Assessment for Electrocatalytic Production of Furandicarboxylic Acid" provides the following input and output data for FDCA production via the electrochemical pathway: input data include 4,763.88 kg of water, 495.427 kg of sulphuric acid, 85,073.6 kg of HMF, 159,840.0 kWh of electricity, 98.77 kg of Co6.4Ni, 504,884.5 kg of water, and 270.48 kg of K…	Yes
26	Do you have inventory data for ethylene production from the conversion of empty fruit bunches?	The production of 1 kg of bioethylene requires 1.77 kg of ethanol, 0.57 kg of NaOH, 0.237 kg of water, 0.261 kWh of electricity, 3.76 MJ of heat, and 0.23 kg of catalyst, yielding 1.35 kg of water, 0.045 kg of waste ethylene, 0.036 kg of OH⁻, 0.042 kg of CO₃²⁻, 0.082 kg of Na⁺, 0.0053 kg of butene, and 0.0033 kg of acetaldehyde as co-products.	I don't know the answer.	No	Yes, I have inventory data for Ethylene production using the Empty fruit bunch (EFB)-based pathway. The output flows include Acetaldehyde (0.0033 kg), Butene (0.0053 kg), Na[+] (0.082 kg), CO3 2- (0.042 kg), OH[-] (0.036 kg), Ethylene (waste) (0.045 kg), H2O (1.35 kg), and Bioethylene (1.0 kg). The input flows are Catalyst (0.23 kg) and Heat (3.76 MJ).	Yes
27	What is the global warming potential value for Ethylene glycol in the geographical location of China?	GWP results: 7538 kg CO2-eq/t/t and 0.8 t CO2-eq/t/t.	I don't know the answer.	No	The Global warming potential value for Ethylene glycol in geography China is 0.8 t CO2-eq/t and 7538.0 kg CO2-eq/t.	Yes
28	Which activities produce Xylitol and in which geography?	Xylitol production in India and Denmark.	Xylitol production occurs in India and Denmark.	Yes	Xylitol production is involved in India and Denmark.	Yes
29	List all cradle-to-gate global warming potential values for Propylene glycol.	Cradle-to-gate GWP results for propylene glycol: 4.8, 4.5, 1.85 kg CO2-eq/kg	I don't know the answer.	No	The Cradle-to-gate Global warming potential values for Propylene glycol are 1.85 kg CO2-eq/kg, 4.5 kg CO2-eq/kg, and 4.8 kg CO2-eq/kg.	Yes
30	List all reference papers that use cradle-to-gate as the system boundary for Propylene glycol.	High-Value Propylene Glycol from Low-Value Biodiesel Glycerol: A Techno-Economic and Environmental Assessment under Uncertainty	I don't know the answer.	No	Paper_title: High-Value Propylene Glycol from Low-Value Biodiesel Glycerol: A Techno-Economic and Environmental Assessment under Uncertainty	Yes
31	List all flows associated with the activity 'Lactic acid production' in the pathway 'Natural gas-to-LA pathway'.	The natural gas-to-LA pathway for producing 1 kg of lactic acid requires 3.02 kg of natural gas, 0.26 kg of ammonia, 0.11 kg of sodium hydroxide, 0.72 kg of calcium hydroxide, and 0.89 kg of makeup water, generating 5.02 kg of wastewater, 0.48 kg of solid waste, and 4.18 kg of direct carbon dioxide emissions as outputs.	The flows associated with the activity "Lactic acid production" in the "Natural gas-to-LA" pathway are as follows: output flows include 4.18 kg of direct carbon dioxide emissions, 0.48 kg of solid waste, 5.02 kg of wastewater, and 1.0 kg of lactic acid; input flows include 0.89 kg of makeup water, 0.72 kg of calcium hydroxide, 0.11 kg of sodium hydroxide, 0.26 kg of ammonia, and 3.02 kg of natura…	Yes	The flows associated with the activity "Lactic acid production" in the technical pathway "Natural gas-to-LA pathway" are as follows: 4.18 kg of direct carbon dioxide emissions, 0.48 kg of solid waste, 5.02 kg of wastewater, and 1.0 kg of lactic acid as outputs; and 0.89 kg of makeup water, 0.72 kg of calcium hydroxide, 0.11 kg of sodium hydroxide, 0.26 kg of ammonia, and 3.02 kg of natural gas as…	Yes
32	What are the global warming potential values and units for Acetic acid according to IPCC 2013?	According to IPCC 2013, the global warming potential values for acetic acid are 11.8 kg CO₂-eq/kg, 1.31 kg CO₂-eq/kg, 12.3 kg CO₂-eq/kg, 1.81 kg CO₂-eq/kg, and 1.31 kg CO₂-eq/kg.	I don't know the answer.	No	The Global warming potential values for Acetic acid according to IPCC 2013 GWP 100a are 1.31 kg CO2-eq/kg, 1.81 kg CO2-eq/kg, 12.3 kg CO2-eq/kg, 1.31 kg CO2-eq/kg, and 11.8 kg CO2-eq/kg.	Yes
33	List all papers for Ethylene with geographic location in United States.	Comparative life cycle analysis on ethylene production from electrocatalytic reduction of carbon dioxide	I don't know the answer.	No	Paper_title: Comparative life cycle analysis on ethylene production from electrocatalytic reduction of carbon dioxide	Yes
34	List all papers published in 2024 for Succinic Acid .	Life Cycle Analysis of Succinic Acid Production in the Brazilian Biorefinery Context	I don't know the answer.	No	The paper titled "Life Cycle Analysis of Succinic Acid Production in the Brazilian Biorefinery Context" was published in 2024 by Silva et al. You can find it at the following DOI: https://doi.org/10.3390/su16031234.	Yes
35	List all system boundary types in the database.	Cradle-to-gate, Cradle-to-grave, Cradle-to-gate and Cradle-to-grave, Not mentioned, Gate-to-gate.	Cradle-to-gate, Cradle-to-grave, Cradle-to-gate and Cradle-to-grave, Not mentioned, Gate-to-gate.	Yes	Cradle-to-gate, Cradle-to-grave, Cradle-to-gate and Cradle-to-grave, Not mentioned, Gate-to-gate.	Yes
36	List all input and output data of Propylene oxide production through the fossil-based pathway.	The production of 1 kg of propylene oxide via the fossil-based pathway requires inputs including 0.573 kg, 0.0002 kg, 0.000159 t·km, 0.393 t·km, 0.28314 kWh, 0.14531 m³, 0.09861 kg, 0.77258 kg, 0.13102 L, 0.928 kg, 0.689 kg, 0.000821 t·km, 0.00291 t·km, 0.0338 t·km, and 0.095 t·km. The outputs include 4.43E-05 kg, 0.00995 kg, 4.89E-05 kg, 0.000955 kg, 0.0128 kg, 1.26E-06 kg, 0.000923 kg, 0.00583 …	I don't know the answer.	No	The output data of Propylene oxide production through the Petro-based pathway includes the following flows: Sodium hydroxide (0.00142 kg), Propylene oxide (1.0 kg), Propylene oxide (Air) (0.000472 kg), Phenols (0.00133 kg), NMVOC (0.00583 kg), Hydrocarbons (0.000923 kg), Chlorine (1.26e-06 kg), Carbon dioxide (0.0128 kg), Benzene, ethyl- (0.000955 kg), and Ammonia (4.89e-05 kg).	Yes
37	Which activities produce Propylene and in which geography?	Propylene production; China.	I don't know the answer.	No	Propylene production activities take place in China.	Yes
38	What is the technical pathway for Propylene production in China?	Propane dehydrogenation (PDH) pathway; Coal to olefin (CTO) pathway; Steam cracking (SC) pathway; catalytic cracking (CC) pathway; Methanol-to-olefins (MTO) pathway; Methanol-topropylene (MTP) pathway	I don't know the answer.	No	I don't know the answer.	No
39	What are the Global warming potential results with the unit for ethylene according to the 'TRACI' method?"	['Naphtha: 198 kg CO2-eq.', 'Ethane: 167 kg CO2-eq.', 'Ethanol: 268 kg CO2-eq.']	I don't know the answer.	No	268.0 kg CO2-eq. (millions), 167.0 kg CO2-eq. (millions), 198.0 kg CO2-eq. (millions) are the LCIA result values for Ethylene according to the 'TRACI' method.	Yes
40	List all papers published in 2021 about Acrylic acid.	Paper title: 'Sustainable Production of Acrylic Acid via 3-Hydroxypropionic Acid from Lignocellulosic Biomass'	I don't know the answer.	No	The paper titled "Sustainable Production of Acrylic Acid via 3-Hydroxypropionic Acid from Lignocellulosic Biomass".	Yes
41	What are the global warming potential values with units for Ethylene oxide according to CML 2001?	-0.5 kg CO2-eq/kg; 3.62 kg CO2-eq/kg; 4.11 kg CO2-eq/kg	I don't know the answer.	No	I don't know the answer.	No
42	What are the system boundary, functional unit, and geographic location for the paper ‘Sustainable Lactic Acid Production from Lignocellulosic Biomass’?	System boundary: cradle-to-gate, functional unit: 1.0 kg of lactic acid, and geographic location: the United States.	The system boundary is cradle-to-gate, the functional unit is 1.0 kg of lactic acid, and the geographic location is the United States.	Yes	The system boundary is cradle-to-gate, the functional unit is 1.0 kg of lactic acid, and the geographic location is the United States.	Yes
43	The author and the publication year of the paper titled 'Sustainable Lactic Acid Production from Lignocellulosic Biomass’?	The author of the paper titled 'Sustainable Lactic Acid Production from Lignocellulosic Biomass' is Li et al., the publication year is 2021	Li et al. authored the paper titled 'Sustainable Lactic Acid Production from Lignocellulosic Biomass', but the publication year is not provided.	Yes	The author of the paper titled 'Sustainable Lactic Acid Production from Lignocellulosic Biomass' is Li et al., but the publication year is not provided.	Yes
44	What are the global warming potential values and units for p-Xylene through the Starch-based pathway?	1660.0 kg CO2-eq/t	I don't know the answer.	No	The Global warming potential value for p-Xylene through the Oak-based pX pathway is 1660.0 kg CO2-eq/t.	Yes
45	List all papers for Xylitol.	Sugarcane bagasse valorization to xylitol: Techno-economic and life cycle assessment'; 'Life cycle assessment of an integrated xylitol biorefinery with value-added co-products'; 'Life cycle assessment of fermentative xylitol production from wheat bran: A comparative evaluation of sulphuric acid and chemical-free wet air oxidation-based pretreatment.'	"Life cycle assessment of fermentative xylitol production from wheat bran: A comparative evaluation of sulphuric acid and chemical-free wet air oxidation-based pretreatment," "Life cycle assessment of fermentative xylitol production from wheat bran: A comparative evaluation of sulphuric acid and chemical-free wet air oxidation-based pretreatment," "Life cycle assessment of an integrated xylitol b…	Yes	"Life cycle assessment of fermentative xylitol production from wheat bran: A comparative evaluation of sulphuric acid and chemical-free wet air oxidation-based pretreatment," "Life cycle assessment of fermentative xylitol production from wheat bran: A comparative evaluation of sulphuric acid and chemical-free wet air oxidation-based pretreatment," "Life cycle assessment of an integrated xylitol b…	Yes
46	What are the impact indicator values and their units for ‘1,3-Butadiene’ assessed using the ReCiPe method?	2.04, 2.13, and 1.49 t CO2-eq/t	I don't know the answer.	No	The impact indicator values for 1,3-Butadiene assessed using the ReCiPe method are 1.49 t CO2-eq/t, 2.13 t CO2-eq/t, and 2.04 t CO2-eq/t.	Yes
47	List all input and output data of the Itaconic acid production based on the Wheat straw-based pathway.	The wheat straw-based pathway for producing 2,203 t of itaconic acid requires inputs of 26,605 t of straw wheat, 140,213 t of water, 27,496 t of steam, 118 t of enzyme, 82,814 MWh of electricity, 89 t of NH₄NO₃, 148 t of CaCl₂, 3 t of KH₂PO₄, 33 t of NH₃, 668 t of glucose, 2,928 t of NaOH, 745,433 t of biomass residues, and 234,383 t of air, yielding 781 t of biogenic CO₂, 2,259 t of air, 23,995 …	The input data for the Itaconic acid production based on the Wheat straw-based pathway includes 234,383.0 t of Air, 2,230.0 MWh of Electricity, 69,814.0 t of Water, 745,433.0 t of Biomass residues, and an additional 115.0 MWh of Electricity. The output data includes 2,203.0 t of Itaconic acid, 167,807.0 m3 of Effluent water, 23,995.0 t of Organic amendment, 2,259.0 t of Air, and 781.0 t of CO2 bi…	Yes	The input and output data for itaconic acid production via the wheat straw-based pathway are as follows: input flows include 234,383.0 t of air, 2,230.0 MWh of electricity, 69,814.0 t of water, 745,433.0 t of biomass residues, and 115.0 MWh of electricity. Output flows:	Yes
48	List all input and output data of the 1,3-Butadiene production based on the naphtha cracking.	The production of 1 t of 1,3-butadiene via naphtha cracking requires 22.2 t of naphtha and 200 GJ of energy, producing 7 t of ethylene, 3.22 t of propylene, 2.89 t of aromatics and C₄, 3 t of CH₄, 0.222 t of H₂, 2.44 t of other products, 2.44 t of losses and blackflows, and 13.3 t of CO₂ as co-products.	I don't know the answer.	No	The input and output data for 1,3-butadiene production based on the naphtha cracking pathway are as follows: the input includes 200.0 GJ of energy, while the outputs consist of 1.0 t of 1,3-butadiene, 13.3 t of CO₂, 2.44 t of losses and blackflows, and 2.44 t of other outputs.	Yes
49	What sector names are included in the Sector?	Chemical	Chemical is included in the Sector.	Yes	Chemical is included in the Sector.	Yes
50	List the inventory data of the Lactic acid production that uses Sugarcane bagasse as input feedstock.	The inventory data for the activity "Lactic acid production" with the technical pathway "Sugarcane bagasse-based pathway" includes the following output flows: 0.82 kg of Gypsum, 16.0 kg of Water, and 1.08 kg of Lactic acid. The input flows are 16.0 kg of Fermented broth, 1.31 kg of Calcium lactate, and 0.59 kg of H2SO4.	I don't know the answer.	No	The inventory data for the activity "Lactic acid production" with the technical pathway "Sugarcane bagasse-based pathway" includes the following output flows: 0.82 kg of Gypsum, 16.0 kg of Water, and 1.08 kg of Lactic acid. The input flows are 16.0 kg of Fermented broth, 1.31 kg of Calcium lactate, and 0.59 kg of H2SO4.	Yes

## Sheet: Reference
ID	Author, Year	Title
1	Liu et al. 2020	Comprehensive analysis of environmental impacts and energy consumption of biomass-to-methanol and coal-to-methanol via life cycle assessment
2	Renó et al. 2011	A LCA (life cycle assessment) of the methanol production from sugarcane bagasse
3	Zhu et al. 2022	LCA comparison analysis for two types of H2 carriers: Methanol and ammonia
4	Galusnyak et al. 2021	Life Cycle Assessment of Bio-methanol Derived from Various Raw-materials
5	Galusnyak et al. 2023	From Secondary Biomass to Bio-Methanol through CONVERGE Technology: An Environmental Analysis
6	Fózer et al. 2021	Sustainability assessment of biomethanol production via hydrothermal gasification supported by artificial neural network
7	Khoo et al. 2016	Bio-chemicals from lignocellulose feedstock: sustainability, LCA and the green conundrum
8	Choe et al. 2022	Techno-economic and environmental assessments for sustainable bio-methanol production as landfill gas valorization
9	Budsberg et al. 2020	Production routes to bio-acetic acid: life cycle assessment
10	Gadkari et al. 2021	Microbial electrosynthesis: is it sustainable for bioproduction of acetic acid?
11	Akmalina and Pawitra. (2020)	Life cycle assessment of ethylene production from empty fruit bunch
12	Yang et al. (2018)	Manufacturing Ethylene from Wet Shale Gas and Biomass: Comparative Technoeconomic Analysis and Environmental Life Cycle Assessment
13	Ghanta et al. (2014)	Environmental impacts of ethylene production from diverse feedstocks and energy sources
14	Liptow et al. (2015)	Life cycle assessment of biomass-based ethylene production in Sweden — is gasification or fermentation the environmentally preferable route?
15	Khoo et al. (2020)	LCA of electrochemical reduction of CO2 to ethylene
16	Alonso-Fariñas et al. 2018	Environmental assessment of thermo-chemical processes for bio-ethylene production in comparison with bio-chemical and fossil-based ethylene
17	Hong et al. 2014	Life cycle assessment of corn- and cassava-based ethylene production
18	Oliveira et al. 2019	Bio-ethylene from sugarcane as a competitiveness strategy for the Brazilian chemical industry
19	Xu et al. 2021	Comparative Life Cycle Assessment of Energy Consumption, Pollutant Emission, and Cost Analysis of Coal/Oil/Biomass to Ethylene Glycol
20	Zhao et al. 2021	Advancing development of biochemicals through the comprehensive evaluation of bio-ethylene glycol
21	Tähkämö et al. 2022	Life cycle assessment of renewable liquid hydrocarbons, propylene, and polypropylene derived from bio-based waste and residues: Evaluation of climate change impacts and abiotic resource depletion potential
22	Moretti et al. 2020	Environmental life cycle assessment of polypropylene made from used cooking oil
23	Kikuchi et al. 2017	Greenhouse gas emissions and socioeconomic effects of biomass-derived products based on structural path and life cycle analyses: A case study of polyethylene and polypropylene in Japan
24	Nachtergaele et al. 2019	Environmental sustainability assessment of renewables-based propylene glycol at full industrial scale production
25	Gonzalez-Garay et al. 2017	High-Value Propylene Glycol from Low-Value Biodiesel Glycerol: A Techno-Economic and Environmental Assessment under Uncertainty
26	Gong and You. 2015	Value-Added Chemicals from Microalgae: Greener, More Economical, or Both?
27	Sun et al. 2022	Hydrogenolysis of Glycerol to Propylene Glycol: Energy, Tech-Economic, and Environmental Studies
28	Liew et al. 2022	Carbon-negative production of acetone and isopropanol by gas fermentation at industrial pilot scale
29	Adom et al. 2014	Life-Cycle Fossil Energy Consumption and Greenhouse Gas Emissions of Bioderived Chemicals and Their Conventional Counterparts
30	Bhagwat et al. 2021	Sustainable Production of Acrylic Acid via 3-Hydroxypropionic Acid from Lignocellulosic Biomass
31	Cespi et al. 2015	Glycerol as feedstock in the synthesis of chemicals: a life cycle analysis for acrolein production
32	Tripodi et al. 2018	Acetonitrile from Bioethanol Ammoxidation: Process Design from the Grass-Roots and Life Cycle Analysis
33	Ögmundarson et al. 2020	Environmental hotspots of lactic acid production systems
34	Li et al. 2021	Sustainable Lactic Acid Production from Lignocellulosic Biomass
35	Morales et al. 2015	Environmental and economic assessment of lactic acid production from glycerol using cascade bio- and chemocatalysis
36	Munagala et al. 2021	Life cycle and economic assessment of sugarcane bagasse valorization to lactic acid
37	Daful et al. 2016	Environmental impact assessment of lignocellulosic lactic acid production: Integrated with existing sugar mills
38	Pachón et al. 2020	Conversion of vine shoots into bioethanol and chemicals: Prospective LCA of biorefinery concept
39	Lee et al. 2021	Life cycle analysis of renewable natural gas and lactic acid production from waste feedstocks
40	Mandegari et al. 2017	Multi-criteria analysis of a biorefinery for co-production of lactic acid and ethanol from sugarcane lignocellulose
41	Ding et al. 2023	Relay photo/thermal catalysis enables efficient cascade upgrading of sugars to lactic acid: Mechanism study and life cycle assessment
42	Meghana et al. 2021	Valorization of sugarcane bagasse to lactic acid: Life cycle assessment and Techno-economic evaluation in Indian scenario
43	Lopes et al. 2019	Techno-economic and life-cycle assessments of small-scale biorefineries for isobutene and xylo-oligosaccharides production: a comparative study in Portugal and Chile
44	Fazeni-Fraisl and Lindorfer. 2022	Comparative life cycle assessment of first- and second-generation bio-isobutene as a drop-in substitute for fossil isobutene
45	Berger et al. 2022	The techno-economic feasibility and carbon footprint of recycling and electrolysing CO2 emissions into ethanol and syngas in an isobutene biorefinery
46	Cabrera Camacho et al. 2020	Techno-economic and Life-Cycle Assessment of One-Step Production of 1,3-Butadiene from Bioethanol Using Reaction Data under Industrial Operating Conditions
47	Cabrera Camacho et al. 2022	Assessing the economic and environmental sustainability of bio-olefins: The case of 1,3-butadiene production from bioethanol
48	Shylesh et al. 2016	From Sugars to Wheels: The Conversion of Ethanol to 1,3-Butadiene over Metal-Promoted Magnesia-Silicate Catalysts
49	Farzad et al. 2017	Integrated techno-economic and environmental analysis of butadiene production from biomass
50	Cespi et al. 2016	Butadiene from biomass, a life cycle perspective to address sustainability in the chemical industry
51	Rodgers et al. 2022	Renewable butadiene: A case for hybrid processing via bio- and chemo-catalysis
52	Sadhukhan et al. 2019	Novel macroalgae (seaweed) biorefinery systems for integrated chemical, protein, salt, nutrient and mineral extractions and environmental protection by green synthesis and life cycle sustainability assessments
53	Isoni et al. 2018	Biomass to levulinic acid: A techno-economic analysis and sustainability of biorefinery processes in Southeast Asia
54	Hafyan et al. 2020	Sustainability assessment of levulinic acid and succinic acid production from empty fruit bunch
55	Thompson et al. 2021	Comparison of pyrolysis and hydrolysis processes for furfural production from sugar beet pulp: A case study in southern Idaho, USA
56	Luo et al. 2021	Comparative Study of Different Hybrid Life Cycle Assessment Methodologies Applied to Biomass-based Chemical Production
57	Athaley et al. 2019	Techno-economic and life cycle analysis of different types of hydrolysis process for the production of p-Xylene
58	Lin et al. 2015	Life Cycle Assessment of Biobased p-Xylene Production
59	Rosental et al. 2020	Life Cycle Assessment of Carbon Capture and Utilization for the Production of Large Volume Organic Chemicals
60	Zheng et al. 2018	Life-cycle assessment and techno-economic analysis of the utilization of bio-oil components for the production of three chemicals
61	Perederic et al. 2020	Life Cycle Analysis of Phenol - Formaldehyde Resins Substituted with Lignin
62	Patel et al. 2022	Technoeconomic and Life-Cycle Assessment for Electrocatalytic Production of Furandicarboxylic Acid
63	Kim et al. 2020	Sustainable Production of Bioplastics from Lignocellulosic Biomass: Technoeconomic Analysis and Life-Cycle Assessment
64	Kim et al. 2022	Integrative technical, economic, and environmental sustainability analysis for the development process of biomass-derived 2,5-furandicarboxylic acid
65	Isola et al. 2017	Life cycle assessment of photodegradable polymeric material derived from renewable bioresources

## Sheet: LCA reference
Value chain	Chemicals	Author, Year	Title	DOI	Specific product	Note
C1 value chain	Methanol	Liu et al. 2020	Comprehensive analysis of environmental impacts and energy consumption of biomass-to-methanol and coal-to-methanol via life cycle assessment	https://doi.org/10.1016/j.energy.2020.117961	Methanol
C1 value chain	Methanol	Reno et al. 2011	A LCA (life cycle assessment) of the methanol production from sugarcane bagasse	https://doi.org/10.1016/j.energy.2010.12.010	Methanol
C1 value chain	Methanol	Zhu et al. 2022	LCA comparison analysis for two types of H2 carriers: Methanol and ammonia	https://doi.org/10.1002/er.7947	Methanol
C1 value chain	Methanol	Galusnyak et al. 2021	Life Cycle Assessment of Bio-methanol Derived from Various Raw-materials	https://doi.org/10.3303/CET2186112	Methanol
C1 value chain	Methanol	Galusnyak et al. 2023	From Secondary Biomass to Bio-Methanol through CONVERGE Technology: An Environmental Analysis	https://doi.org/10.3390/en16062726	Methanol
C1 value chain	Methanol	Fózer et al. 2021	Sustainability assessment of biomethanol production via hydrothermal gasification supported by artificial neural network	https://doi.org/10.1016/j.jclepro.2021.128606	Methanol
C1 value chain	Methanol	Khoo et al. 2016	Bio-chemicals from lignocellulose feedstock: sustainability, LCA and the green conundrum	https://doi.org/10.1039/C5GC02065D	Methanol
C1 value chain	Methanol	Choe et al. 2022	Techno-economic and environmental assessments for sustainable bio-methanol production as landfill gas valorization	https://doi.org/10.1016/j.wasman.2022.06.040	Methanol
C2 value chain	Acetic acid	Budsberg et al. 2020	Production routes to bio-acetic acid: life cycle assessment	https://doi.org/10.1186/s13068-020-01784-y	Acetic acid
C2 value chain	Acetic acid	Gadkari et al. 2021	Microbial electrosynthesis: is it sustainable for bioproduction of acetic acid?	10.1039/D1RA00920F	Acetic acid
C2 value chain	Ethylene	Akmalina and Pawitra. (2020)	Life cycle assessment of ethylene production from empty fruit bunch	https://doi.org/10.1002/apj.2436	Ethylene
C2 value chain	Ethylene	Yang et al. (2018)	Manufacturing Ethylene from Wet Shale Gas and Biomass: Comparative Technoeconomic Analysis and Environmental Life Cycle Assessment	https://doi.org/10.1021/acs.iecr.7b03731	Ethylene
C2 value chain	Ethylene	Ghanta et al. (2014)	Environmental impacts of ethylene production from diverse feedstocks and energy sources	https://doi.org/10.1007/s13203-013-0029-7	Ethylene
C2 value chain	Ethylene	Liptow et al. (2015)	Life cycle assessment of biomass-based ethylene production in Sweden — is gasification or fermentation the environmentally preferable route?	https://doi.org/10.1007/s11367-015-0855-1	Ethylene
C2 value chain	Ethylene	Khoo et al. (2020)	LCA of electrochemical reduction of CO2 to ethylene	https://doi.org/10.1016/j.jcou.2020.101229	Ethylene
C2 value chain	Ethylene	Alonso-Fariñas et al. 2018	Environmental assessment of thermo-chemical processes for bio-ethylene production in comparison with bio-chemical and fossil-based ethylene	https://doi.org/10.1016/j.jclepro.2018.08.147	Ethylene
C2 value chain	Ethylene	Hong et al. 2014	Life cycle assessment of corn- and cassava-based ethylene production	https://doi.org/10.1016/j.biombioe.2014.05.014	Ethylene
C2 Value Chain	Ethylene	Oliveira et al. 2019	Bio-ethylene from sugarcane as a competitiveness strategy for the Brazilian chemical industry	https://doi.org/10.1002/bbb.2069	Ethylene
C2 value chain	Ethylene glycol	Xu et al. 2021	Comparative Life Cycle Assessment of Energy Consumption, Pollutant Emission, and Cost Analysis of Coal/Oil/Biomass to Ethylene Glycol	https://doi.org/10.1021/acssuschemeng.1c05454	Ethylene glycol
C2 value chain	Ethylene glycol	Zhao et al. 2021	Advancing development of biochemicals through the comprehensive evaluation of bio-ethylene glycol	https://doi.org/10.1016/j.cej.2021.128516	Ethylene glycol
C3 value chain	Propylene	Tähkämö et al. 2022	Life cycle assessment of renewable liquid hydrocarbons, propylene, and polypropylene derived from bio-based waste and residues: Evaluation of climate change impacts and abiotic resource depletion potential	https://doi.org/10.1016/j.jclepro.2022.134645	Propylene
C3 value chain	Propylene	Moretti et al. 2020	Environmental life cycle assessment of polypropylene made from used cooking oil	https://doi.org/10.1016/j.resconrec.2020.104750	Propylene
C3 value chain	Propylene	Kikuchi et al. 2017	Greenhouse gas emissions and socioeconomic effects of biomass-derived products based on structural path and life cycle analyses: A case study of polyethylene and polypropylene in Japan	https://doi.org/10.1016/j.jclepro.2017.08.179	Propylene
C3 value chain	Propylene glycol	Nachtergaele et al. 2019	Environmental sustainability assessment of renewables-based propylene glycol at full industrial scale production	https://doi.org/10.1002/jctb.5951	Propylene glycol
C3 value chain	Propylene glycol	Gonzalez-Garay et al. 2017	High-Value Propylene Glycol from Low-Value Biodiesel Glycerol: A Techno-Economic and Environmental Assessment under Uncertainty	https://doi.org/10.1021/acssuschemeng.7b00286	Propylene glycol
C3 value chain	Propylene glycol	Adom et al. 2014	Life-Cycle Fossil Energy Consumption and Greenhouse Gas Emissions of Bioderived Chemicals and Their Conventional Counterparts	https://doi.org/10.1021/es503766e	Propylene glycol
C3 value chain	Propylene glycol	Gong and You. 2015	Value-Added Chemicals from Microalgae: Greener, More Economical, or Both?	https://doi.org/10.1021/sc500683w	Propylene glycol
C3 value chain	Propylene glycol	Sun et al. 2022	Hydrogenolysis of Glycerol to Propylene Glycol: Energy, Tech-Economic, and Environmental Studies	https://doi.org/10.3389/fchem.2021.778579	Propylene glycol
C3 value chain	Isopropanol	Liew et al. 2022	Carbon-negative production of acetone and isopropanol by gas fermentation at industrial pilot scale	https://doi.org/10.1038/s41587-021-01195-w	Isopropanol
C3 value chain	Acrylonitrile/acrylic acid/acrolein	Adom et al. 2014	Life-Cycle Fossil Energy Consumption and Greenhouse Gas Emissions of Bioderived Chemicals and Their Conventional Counterparts	https://doi.org/10.1021/es503766e	Acrylic acid
C3 value chain	Acrylonitrile/acrylic acid/acrolein	Bhagwat et al. 2021	Sustainable Production of Acrylic Acid via 3-Hydroxypropionic Acid from Lignocellulosic Biomass	https://doi.org/10.1021/acssuschemeng.1c05441	Acrylic acid
C3 value chain	Acrylonitrile/acrylic acid/acrolein	Cespi et al. 2015	Glycerol as feedstock in the synthesis of chemicals: a life cycle analysis for acrolein production	https://doi.org/10.1039/C4GC01497A	acrolein
C3 value chain	Acrylonitrile/acrylic acid/acrolein	Tripodi et al. 2018	Acetonitrile from Bioethanol Ammoxidation: Process Design from the Grass-Roots and Life Cycle Analysis	https://doi.org/10.1021/acssuschemeng.8b00215	Acetonitrile
C3 Value Chain	Lactic acid	Ögmundarson et al. 2020	Environmental hotspots of lactic acid production systems	https://doi.org/10.1111/gcbb.12652	lactic acid
C3 Value Chain	Lactic acid	Li et al. 2021	Sustainable Lactic Acid Production from Lignocellulosic Biomass	https://doi.org/10.1021/acssuschemeng.0c08055	lactic acid
C3 value chain	lactic acid	Morales et al. 2015	Environmental and economic assessment of lactic acid production from glycerol using cascade bio- and chemocatalysis		lactic acid
C3 Value Chain	Lactic acid	Munagala et al. 2021	Life cycle and economic assessment of sugarcane bagasse valorization to lactic acid	https://doi.org/10.1016/j.wasman.2021.02.052	lactic acid
C3 Value Chain	Lactic acid	Daful et al. 2016	Environmental impact assessment of lignocellulosic lactic acid production: Integrated with existing sugar mills	https://doi.org/10.1016/j.fbp.2016.04.005	lactic acid
C3 Value Chain	Lactic acid	Pachón et al. 2020	Conversion of vine shoots into bioethanol and chemicals: Prospective LCA of biorefinery concept	https://doi.org/10.1016/j.biortech.2020.122946	lactic acid
C3 Value Chain	Lactic acid	Lee et al. 2021	Life cycle analysis of renewable natural gas and lactic acid production from waste feedstocks	https://doi.org/10.1016/j.jclepro.2021.127653	lactic acid
C3 Value Chain	Lactic acid	Mandegari et al. 2017	Multi-criteria analysis of a biorefinery for co-production of lactic acid and ethanol from sugarcane lignocellulose	https://doi.org/10.1002/bbb.1801	lactic acid
C3 Value Chain	Lactic acid	Ding et al. 2023	Relay photo/thermal catalysis enables efficient cascade upgrading of sugars to lactic acid: Mechanism study and life cycle assessment	https://doi.org/10.1016/j.cej.2022.139687	lactic acid
C3 Value Chain	Lactic acid	Meghana et al. 2021	Valorization of sugarcane bagasse to lactic acid: Life cycle assessment and Techno-economic evaluation in Indian scenario	https://doi.org/10.1016/B978-0-323-88506-5.50304-1	lactic acid
C4 value chain	Isobutylene	Lopes et al. 2019	Techno-economic and life-cycle assessments of small-scale biorefineries for isobutene and xylo-oligosaccharides production: a comparative study in Portugal and Chile	https://doi.org/10.1002/bbb.2036	Isobutylene
C4 value chain	Isobutylene	Fazeni-Fraisl and Lindorfer. 2022	Comparative life cycle assessment of first- and second-generation bio-isobutene as a drop-in substitute for fossil isobutene	https://doi.org/10.1002/bbb.2444	Isobutylene
C4 Value Chain	Isobutylene	Berger et al. 2022	The techno-economic feasibility and carbon footprint of recycling and electrolysing CO2 emissions into ethanol and syngas in an isobutene biorefinery	https://doi.org/10.1016/j.spc.2022.05.014	Isobutylene
C4 value chain	1,3-butadiene	Cabrera Camacho et al. 2020	Techno-economic and Life-Cycle Assessment of One-Step Production of 1,3-Butadiene from Bioethanol Using Reaction Data under Industrial Operating Conditions	https://doi.org/10.1021/acssuschemeng.0c02678	Butadiene
C4 value chain	1,3-butadiene	Cabrera Camacho et al. 2022	Assessing the economic and environmental sustainability of bio-olefins: The case of 1,3-butadiene production from bioethanol	https://doi.org/10.1016/j.jclepro.2022.133963	Butadiene
C4 value chain	1,3-butadiene	Shylesh et al. 2016	From Sugars to Wheels: The Conversion of Ethanol to 1,3-Butadiene over Metal-Promoted Magnesia-Silicate Catalysts	https://doi.org/10.1002/cssc.201600195	Butadiene
C4 value chain	1,3-butadiene	Farzad et al. 2017	Integrated techno-economic and environmental analysis of butadiene production from biomass	https://doi.org/10.1016/j.biortech.2017.04.130	Butadiene
C4 value chain	1,3-butadiene	Cespi et al. 2016	Butadiene from biomass, a life cycle perspective to address sustainability in the chemical industry	https://doi.org/10.1016/j.jclepro.2022.132614	Butadiene
C4 value chain	1,3-butadiene	Rodgers et al. 2022	Renewable butadiene: A case for hybrid processing via bio- and chemo-catalysis	https://doi.org/10.1016/j.jclepro.2022.132614	Butadiene
C5 value chain	Levulinic acid	Sadhukhan et al. 2019	Novel macroalgae (seaweed) biorefinery systems for integrated chemical, protein, salt, nutrient and mineral extractions and environmental protection by green synthesis and life cycle sustainability assessments	https://doi.org/10.1039/C9GC00607A	Levulinic acid
C5 value chain	Levulinic acid	Isoni et al. 2018	Biomass to levulinic acid: A techno-economic analysis and sustainability of biorefinery processes in Southeast Asia	https://doi.org/10.1016/j.jenvman.2018.03.012	Levulinic acid
C5 value chain	Levulinic acid	Hafyan et al. 2020	Sustainability assessment of levulinic acid and succinic acid production from empty fruit bunch	10.1088/1757-899X/778/1/012140	Levulinic acid
C5 value chain	Furfural	Thompson et al. 2021	Comparison of pyrolysis and hydrolysis processes for furfural production from sugar beet pulp: A case study in southern Idaho, USA	https://doi.org/10.1016/j.jclepro.2021.127695	Furfural
C6+ value chain	BTEX	Luo et al. 2021	Comparative Study of Different Hybrid Life Cycle Assessment Methodologies Applied to Biomass-based Chemical Production	https://doi.org/10.1016/B978-0-323-88506-5.50261-8	p-xylene
C6+ value chain	BTEX	Athaley et al. 2019	Techno-economic and life cycle analysis of different types of hydrolysis process for the production of p-Xylene	https://doi.org/10.1016/j.compchemeng.2018.11.018	p-xylene
C6+ value chain	BTEX	Lin et al. 2015	Life Cycle Assessment of Biobased p-Xylene Production	https://doi.org/10.1021/ie5037287	p-xylene
C6+ value chain	BTEX	Rosental et al. 2020	Life Cycle Assessment of Carbon Capture and Utilization for the Production of Large Volume Organic Chemicals	https://doi.org/10.3389/fclim.2020.586199	BTX
C6+ value chain	Phenols	Zheng et al. 2018	Life-cycle assessment and techno-economic analysis of the utilization of bio-oil components for the production of three chemicals	https://doi.org/10.1039/C8GC01181H
C6+ value chain	Phenols	Perederic et al. 2020	Life Cycle Analysis of Phenol - Formaldehyde Resins Substituted with Lignin	https://doi.org/10.1016/B978-0-12-823377-1.50102-6
C6+ value chain	2,5-furan dicarboxylic acid (FDCA)	Patel et al. 2022	Technoeconomic and Life-Cycle Assessment for Electrocatalytic Production of Furandicarboxylic Acid		FDCA
C6+ value chain	2,5-furan dicarboxylic acid (FDCA)	Kim et al. 2020	Sustainable Production of Bioplastics from Lignocellulosic Biomass: Technoeconomic Analysis and Life-Cycle Assessment	https://doi.org/10.1021/acssuschemeng.0c02872	FDCA
C6+ value chain	2,5-furan dicarboxylic acid (FDCA)	Kim et al. 2022	Integrative technical, economic, and environmental sustainability analysis for the development process of biomass-derived 2,5-furandicarboxylic acid	https://doi.org/10.1016/j.rser.2021.112059	FDCA
C6+ value chain	2,5-furan dicarboxylic acid (FDCA)	Isola et al. 2017	Life cycle assessment of photodegradable polymeric material derived from renewable bioresources	https://doi.org/10.1016/j.jclepro.2016.10.177	FDCA

## Sheet: Summary
Value Chain	Chemicals	Biomass routes	Benchmark routes (fossil)	# of LCA studies	Note
C1 value chain	Methanol			8
	Formaldehyde			0
C2 value chain	Ethylene			8
	Ethylene oxide			0
	Ethylene glycol			2
	Acetic acid			2
C3 value chain	Propylene			3
	Propylene oxide			0
	Propylene glycol			5
	Isopropanol			1
	Acrylonitrile/acrylic acid/acrolein			4
	Lactic acid			10
C4 value chain	Isobutylene			3
	1,3-butadiene			6
C5 value chain	Levulinic acid			3
	Furfural			1
C6+ value chain	BTEX			4
	Phenols			2
	2,5-furan dicarboxylic acid (FDCA)			4
Total # of references				66
