# Supplementary material for: From Literature to Knowledge Graphs: Automated Extraction and Retrieval of Life Cycle Assessment Data with Large Language Models
Source: Research Square preprint supplement (doi:10.21203/rs.3.rs-8633241/v1), 2026-01-27
Supplement: Supplementary file 2 [file 555dda60845fc01e349dfec5.xlsx]

## Sheet: Summary_modified
New_ID	Sector	Title	Author	Published year	Doi	LCI inventory location	Page number	LCI inventory pathway	Has recorded?	Note	Inventory activity	System boundary	Functional unit	FunctionalUnit Quantity	FunctionalUnit Unit	FunctionalUnit Product	Reference product	Impact assessment method	Impact category	Geography	LCIA results
[1]	Chemical	Carbon footprint evaluation of coal-to-methanol chain with the hierarchical attribution management and life cycle assessment	Qin et al.	2016	https://doi.org/10.1016/j.enconman.2016.07.005	Not provided	/	/	/	/	/	Cradle-to-gate	1 tonne of methanol	1	tonne	methanol	Methanol	IPCC 2013 AR4	['Global warming potential (GWP)']	China	['Basic coal-to-methanol chain: 2.971 t CO2-e/t methanol', 'Retrofitted coal-to-methanol chain with CCS: 0.64 t CO2-e/t methanol']
[2]	Chemical	Comparative environmental assessment of methanol production technologies: A cradle-to-gate life cycle analysis	Liu et al.	2024	https://doi.org/10.1016/j.enconman.2024.118128	Table 1.	6	Coal Gasification to MeOH (CGTM)	Yes.	The inventory table includes coal mining and processing, synthetic gas production, and methanol production. Only record methanol production.	Methanol production	Cradle-to-gate	1 tonne of methanol	1	tonne	methanol	Methanol	CML2001 and Eco-indicator 99	['Global warming potential (GWP)', 'Abiotic depletion potential (ADP)', 'Eutrophication potential (EP)', 'Human toxicity potential (HTP)', 'Ozone depletion potential (ODP)', 'Photochemical oxidation potential (POCP)', 'Freshwater aquatic ecotoxicity potential (FAETP)', 'Marine aquatic ecotoxicity potential (MAETP)', 'Terrestrial ecotoxicity potential (TETP)', 'Acidification potential (AP)']	China	['BOTM: Negative GHG emissions', 'CCTM: 54.9% reduction by electricity optimization, 85.2% reduction by optimizing both steam and electricity']
[2]	Chemical	Comparative environmental assessment of methanol production technologies: A cradle-to-gate life cycle analysis	Liu et al.	2024	https://doi.org/10.1016/j.enconman.2024.118128	Table 2.	7	Coal Coking to MeOH (COTM)	Yes.	The inventory table includes coal mining and processing, coke production, and methanol production. Only record methanol production.	Methanol production	Cradle-to-gate	1 tonne of methanol	1	tonne	methanol	Methanol	CML2001 and Eco-indicator 99	['Global warming potential (GWP)', 'Abiotic depletion potential (ADP)', 'Eutrophication potential (EP)', 'Human toxicity potential (HTP)', 'Ozone depletion potential (ODP)', 'Photochemical oxidation potential (POCP)', 'Freshwater aquatic ecotoxicity potential (FAETP)', 'Marine aquatic ecotoxicity potential (MAETP)', 'Terrestrial ecotoxicity potential (TETP)', 'Acidification potential (AP)']	China	['BOTM: Negative GHG emissions', 'CCTM: 54.9% reduction by electricity optimization, 85.2% reduction by optimizing both steam and electricity']
[2]	Chemical	Comparative environmental assessment of methanol production technologies: A cradle-to-gate life cycle analysis	Liu et al.	2024	https://doi.org/10.1016/j.enconman.2024.118128	Table 3.	7	Natural Gas to MeOH (NGTM)	Yes.	The inventory table includes natural gas processing and methanol production. Only record methanol production.	Methanol production	Cradle-to-gate	1 tonne of methanol	1	tonne	methanol	Methanol	CML2001 and Eco-indicator 99	['Global warming potential (GWP)', 'Abiotic depletion potential (ADP)', 'Eutrophication potential (EP)', 'Human toxicity potential (HTP)', 'Ozone depletion potential (ODP)', 'Photochemical oxidation potential (POCP)', 'Freshwater aquatic ecotoxicity potential (FAETP)', 'Marine aquatic ecotoxicity potential (MAETP)', 'Terrestrial ecotoxicity potential (TETP)', 'Acidification potential (AP)']	China	['BOTM: Negative GHG emissions', 'CCTM: 54.9% reduction by electricity optimization, 85.2% reduction by optimizing both steam and electricity']
[2]	Chemical	Comparative environmental assessment of methanol production technologies: A cradle-to-gate life cycle analysis	Liu et al.	2024	https://doi.org/10.1016/j.enconman.2024.118128	Table 4.	7	Biomass to MeOH (BOTM)	Yes.	The inventory table includes biomass processing, biomass gasification, and methanol production. Only record methanol production.	Methanol production	Cradle-to-gate	1 tonne of methanol	1	tonne	methanol	Methanol	CML2001 and Eco-indicator 99	['Global warming potential (GWP)', 'Abiotic depletion potential (ADP)', 'Eutrophication potential (EP)', 'Human toxicity potential (HTP)', 'Ozone depletion potential (ODP)', 'Photochemical oxidation potential (POCP)', 'Freshwater aquatic ecotoxicity potential (FAETP)', 'Marine aquatic ecotoxicity potential (MAETP)', 'Terrestrial ecotoxicity potential (TETP)', 'Acidification potential (AP)']	China	['BOTM: Negative GHG emissions', 'CCTM: 54.9% reduction by electricity optimization, 85.2% reduction by optimizing both steam and electricity']
[2]	Chemical	Comparative environmental assessment of methanol production technologies: A cradle-to-gate life cycle analysis	Liu et al.	2024	https://doi.org/10.1016/j.enconman.2024.118128	Table 5.	7	CO2 Capture to MeOH (CCTM)	Yes.	The inventory table includes water electrolysis and CO2 hydrogenation to methanol. Only record CO2 hydrogenation to methanol.	Methanol production	Cradle-to-gate	1 tonne of methanol	1	tonne	methanol	Methanol	CML2001 and Eco-indicator 99	['Global warming potential (GWP)', 'Abiotic depletion potential (ADP)', 'Eutrophication potential (EP)', 'Human toxicity potential (HTP)', 'Ozone depletion potential (ODP)', 'Photochemical oxidation potential (POCP)', 'Freshwater aquatic ecotoxicity potential (FAETP)', 'Marine aquatic ecotoxicity potential (MAETP)', 'Terrestrial ecotoxicity potential (TETP)', 'Acidification potential (AP)']	China	['BOTM: Negative GHG emissions', 'CCTM: 54.9% reduction by electricity optimization, 85.2% reduction by optimizing both steam and electricity']
[3]	Chemical	Greenhouse gas emissions of rice straw-to-methanol chain in Southern Brazil	Silva et al.	2021	https://doi.org/10.1016/j.jece.2021.105202	Table 3.	7	Rice straw-based pathway	Yes.	The inventory table includes rice standard cultivation, rice straw route, and methanol production. Only record methanol production.	Methanol production	Cradle-to-gate	1 kg of methanol	1	kg	methanol	Methanol	IPCC Fifth Assessment Report	['Global warming potential (GWP)']	Southern Brazil	['Methanol: 8.09 Ã— 10^âˆ’1 kg CO2-eq/kg']
[4]	Chemical	Life-cycle assessment for coal-based methanol production in China	Li et al.	2018	https://doi.org/10.1016/j.jclepro.2018.04.051	Table 3.	6	Coal gasification and coal coking pathway	No. Cannot extract (complex table).	/	Methanol production	Cradle-to-gate	1 tonne of methanol	1	tonne	methanol	Methanol	CML 2001	['Abiotic depletion potential (ADP)', 'Acidification potential (AP)', 'Eutrophication potential (EP)', 'Freshwater aquatic eco-toxicity potential (FAETP)', 'Terrestrial eco-toxicity potential (TETP)', 'Global warming potential (GWP)', 'Ozone layer depletion potential (ODP)', 'Photochemical ozone creation potential (POCP)']	China	['CGT: 1.77E+04 kg CO2-eq', 'CCT: 2.89E+03 kg CO2-eq']
[5]	Chemical	Innovative alternatives to methanol manufacture: Carbon footprint assessment	Rumayor et al.	2019	https://doi.org/10.1016/j.jclepro.2019.03.015	Table S1.	3	Conventional natural gas-based pathway (ACONV)	Yes.	No separated activity. Extract the entire table	Methanol production	Cradle-to-gate	1 kg of metahnol	1	kg	metahnol	Methanol	Not mentioned	['Global warming potential (GWP)']	Not mentioned	['A CONV: 0.525 kg CO2-eq./kg', 'A DH: 0.230 kg CO2-eq./kg', 'A ER: Not mentioned', 'A ER-CONV: Not mentioned', 'A ER-DH: Not mentioned']
[5]	Chemical	Innovative alternatives to methanol manufacture: Carbon footprint assessment	Rumayor et al.	2019	https://doi.org/10.1016/j.jclepro.2019.03.015	Table S1.	3	Direct hydrogenation of CO2 pathway (ADH)	Yes.	No separated activity. Extract the entire table	Methanol production	Cradle-to-gate	1 kg of metahnol	1	kg	metahnol	Methanol	Not mentioned	['Global warming potential (GWP)']	Not mentioned	['A CONV: 0.525 kg CO2-eq./kg', 'A DH: 0.230 kg CO2-eq./kg', 'A ER: Not mentioned', 'A ER-CONV: Not mentioned', 'A ER-DH: Not mentioned']
[5]	Chemical	Innovative alternatives to methanol manufacture: Carbon footprint assessment	Rumayor et al.	2019	https://doi.org/10.1016/j.jclepro.2019.03.015	Table S1.	3	Electrochemical reduction of CO2 pathway (AER)	Yes.	No separated activity. Extract the entire table	Methanol production	Cradle-to-gate	1 kg of metahnol	1	kg	metahnol	Methanol	Not mentioned	['Global warming potential (GWP)']	Not mentioned	['A CONV: 0.525 kg CO2-eq./kg', 'A DH: 0.230 kg CO2-eq./kg', 'A ER: Not mentioned', 'A ER-CONV: Not mentioned', 'A ER-DH: Not mentioned']
[6]	Chemical	Olive pomace versus natural gas for methanol production: a life cycle assessment	Puig-Gamero et al.	2021	https://doi.org/10.1007/s11356-021-12710-6	Table 8.	7	Olive pomace gasification pathway	Yes.	The inventory table includes olive pomace gasification, syngas cleaning, and methanol synthesis. Only record methanol synthesis.	Methanol production	Cradle-to-gate	1 kg of methanol	1	kg	methanol	Methanol	ReCiPe 2016	['Global warming potential (GWP)', 'Ozone depletion potential (ODP)', 'Photochemical oxidation formation potential - humans (HOFP)', 'Photochemical oxidation formation potential - ecosystems (EOFP)', 'Terrestrial acidification potential (TAP)', 'Freshwater eutrophication potential (FEP)', 'Marine eutrophication potential (MEP)', 'Human toxicity potential - cancer (HTPc)', 'Human toxicity potentia…	Spain	['Olive pomace to methanol: 19.50 kg CO2-eq', 'Natural gas to methanol: 8.74 kg CO2-eq']
[6]	Chemical	Olive pomace versus natural gas for methanol production: a life cycle assessment	Puig-Gamero et al.	2021	https://doi.org/10.1007/s11356-021-12710-6	Table 12.	12	Natural gas pathway	Yes.	The inventory table includes natural gas reforming, syngas cleaning, and methanol synthesis. Only record methanol synthesis.	Methanol production	Cradle-to-gate	1 kg of methanol	1	kg	methanol	Methanol	ReCiPe 2016	['Global warming potential (GWP)', 'Ozone depletion potential (ODP)', 'Photochemical oxidation formation potential - humans (HOFP)', 'Photochemical oxidation formation potential - ecosystems (EOFP)', 'Terrestrial acidification potential (TAP)', 'Freshwater eutrophication potential (FEP)', 'Marine eutrophication potential (MEP)', 'Human toxicity potential - cancer (HTPc)', 'Human toxicity potentia…	Spain	['Olive pomace to methanol: 19.50 kg CO2-eq', 'Natural gas to methanol: 8.74 kg CO2-eq']
[7]	Chemical	Energy consumption and greenhouse gas emissions of shale gas chemical looping reforming process integrated with coal gasification for methanol production	Xiang et al.	2021	https://doi.org/10.1016/j.applthermaleng.2021.116990	Not provided	/	/	/	/	Methanol production	Cradle-to-gate	1 tonne methanol	1	tonne	methanol	Methanol	CML2001-2016	['Global warming potential (GWP)', 'Acidification potential (AP)', 'Eutrophication potential (EP)', 'Photochem ozone creation potential (POCP)', 'Abiotic depletion potential (ADP) fossil']	Not mentioned	['Novel process: 940 kg CO2-eq/t']
[8]	Chemical	Bridge to zero-emission: Life cycle assessment of CO2-methanol conversion process and energy optimization	Ryoo et al.	2021	https://doi.org/10.1016/j.energy.2021.120626	Table 1.	5	Photocatalytic conversion pathway	Yes.	No separated activity. Extract the entire table	Methanol production	Cradle-to-gate	1 kg of methanol	1	kg	methanol	Methanol	ReCiPe 2016 (H) ver. 1.03	['Global warming potential (GWP)', 'Fine particulate matter formation', 'Freshwater eutrophication', 'Terrestrial acidification', 'Water consumption', 'Fossil resource scarcity']	Republic of Korea	['CGC: 17.7 kg CO2-eq', 'CCC: 2.90 kg CO2-eq', 'PC: 2.28 kg CO2-eq', 'HC: 10.7 kg CO2-eq', 'PC (grid, steam): 2.28 kg CO2-eq', 'PC (grid, coke furnace): 2.43 kg CO2-eq', 'PC (nuclear, solar thermal): 1.29 kg CO2-eq', 'HC (grid, steam): 10.7 kg CO2-eq', 'HC (grid, coke furnace): 11.0 kg CO2-eq', 'HC (nuclear, solar thermal): 1.65 kg CO2-eq']
[8]	Chemical	Bridge to zero-emission: Life cycle assessment of CO2-methanol conversion process and energy optimization	Ryoo et al.	2021	https://doi.org/10.1016/j.energy.2021.120626	Table 1.	5	Hydrogenation conversion pathway	Yes.	No separated activity. Extract the entire table	Methanol production	Cradle-to-gate	1 kg of methanol	1	kg	methanol	Methanol	ReCiPe 2016 (H) ver. 1.03	['Global warming potential (GWP)', 'Fine particulate matter formation', 'Freshwater eutrophication', 'Terrestrial acidification', 'Water consumption', 'Fossil resource scarcity']	Republic of Korea	['CGC: 17.7 kg CO2-eq', 'CCC: 2.90 kg CO2-eq', 'PC: 2.28 kg CO2-eq', 'HC: 10.7 kg CO2-eq', 'PC (grid, steam): 2.28 kg CO2-eq', 'PC (grid, coke furnace): 2.43 kg CO2-eq', 'PC (nuclear, solar thermal): 1.29 kg CO2-eq', 'HC (grid, steam): 10.7 kg CO2-eq', 'HC (grid, coke furnace): 11.0 kg CO2-eq', 'HC (nuclear, solar thermal): 1.65 kg CO2-eq']
[9]	Chemical	Life Cycle Assessment of Carbon Dioxide-Based Production of Methane and Methanol and Derived Polymers	Hoppe et al.	2017	https://doi.org/10.1111/jiec.12583	Not provided	/	/	/	/	Methanol production	Cradle-to-gate	1 kg of methanol	1	kg	methanol	Methanol	Not mentioned	['Global warming potential (GWP)', 'Raw material input (RMI)', 'Total material requirement (TMR)']	Western Europe, Germany	['Methane (CO2 from cement plants): Negative GWI', 'Methanol (CO2 from waste incineration): Lowest GWI']
[10]	Chemical	Comprehensive analysis of environmental impacts and energy consumption of biomass-to-methanol and coal-to-methanol via life cycle assessment	Liu et al.	2020	https://doi.org/10.1016/j.energy.2020.117961	Table 4.	6	Coal-to-methanol (CTM) pathway	Yes.	The inventory table includes coal mining/straw production and processing, Pretreatment, WGS+AGR, and methanol synthesis and purification. Only record methanol synthesis and purification. Fill syngas as the input flow.	Methanol production	Cradle-to-grave	79 tonne of methanol	79	tonne	methanol	Methanol	CML2001	['Global warming potential (GWP)', 'Acidification potential (AP)', 'Human toxicity potential (HTP)']	China	['CTM process: 274,428 kg CO2-eq', 'BTM process: Negative GHG emissions']
[10]	Chemical	Comprehensive analysis of environmental impacts and energy consumption of biomass-to-methanol and coal-to-methanol via life cycle assessment	Liu et al.	2020	https://doi.org/10.1016/j.energy.2020.117961	Table 4.	6	Biomass-to-methanol (BTM) pathway	Yes.	The inventory table includes coal mining/straw production and processing, Pretreatment, WGS+AGR, and methanol synthesis and purification. Only record methanol synthesis and purification. Fill syngas as the input flow.	Methanol synthesis and purification	Cradle-to-grave	79 tonne of methanol	79	tonne	methanol	Methanol	CML2001	['Global warming potential (GWP)', 'Acidification potential (AP)', 'Human toxicity potential (HTP)']	China	['CTM process: 274,428 kg CO2-eq', 'BTM process: Negative GHG emissions']
[11]	Chemical	Environmental life cycle assessment of methanol and electricity co-production system based on coal gasification technology	Śliwińska et al.	2017	https://doi.org/10.1016/j.scitotenv.2016.08.188	Table 1.	4	Coal gasification pathway	Yes.	Multiple activities. The inventory table includes synthesis gas production, methanol production, methanol distillation, and electricity generation. Only record methanol production and distillation.	Methanol production	Cradle-to-gate	1 kg of methanol	1	kg	methanol	Methanol	IPCC 2007 GWP 100a	['Global warming potential (GWP)']	Poland	['Methanol and electricity co-production: 198 Mg CO2-eq/h']
[12]	Chemical	Unveiling environmental impacts of methanol production via electrocatalysis against conventional and thermochemical routes by life cycle assessment	Lin et al.	2023	https://doi.org/10.1016/j.susmat.2023.e00663	Table S2.	2, 3, 4	Conventional pathway (natural gas-based)	Yes.	The inventory table includes syngas generation, methanol synthesis and separation, and purification. Only record methanol synthesis, separation and purification and integrate them into a single table (no output of the Methanol synthesis and separation). Fill effluent gas as the input.	Methanol synthesis, separation and purification	Cradle-to-gate	1 kg of methanol	1	kg	methanol	Methanol	ReCiPe 2016 (H) V 1.03	['Global warming potential (GWP)', 'Terrestrial ecotoxicity (TE)', 'Human non-carcinogenic toxicity (HNC)', 'Fossil resource scarcity (FS)']	Global	['EC pathway: 64.40 kg CO2-eq', 'TC pathway: 87.53 kg CO2-eq reduction', 'EC pathway: 718.28 kg CO2-eq reduction', 'TC pathway powered by 100% hydropower: 4.09 kg CO2-eq']
[12]	Chemical	Unveiling environmental impacts of methanol production via electrocatalysis against conventional and thermochemical routes by life cycle assessment	Lin et al.	2023	https://doi.org/10.1016/j.susmat.2023.e00663	Table S3.	4, 5	Thermochemical hydrogenation of CO2 pathway (with recycling)	Yes.	The inventory table includes CO2 capture, water electrolysis, methanol synthesis and separation, and purification. Only record methanol synthesis, separation and purification and integrate them into a single table (no output of the purification).	Methanol synthesis, separation and purification	Cradle-to-gate	1 kg of methanol	1	kg	methanol	Methanol	ReCiPe 2016 (H) V 1.03	['Global warming potential (GWP)', 'Terrestrial ecotoxicity (TE)', 'Human non-carcinogenic toxicity (HNC)', 'Fossil resource scarcity (FS)']	Global	['EC pathway: 64.40 kg CO2-eq', 'TC pathway: 87.53 kg CO2-eq reduction', 'EC pathway: 718.28 kg CO2-eq reduction', 'TC pathway powered by 100% hydropower: 4.09 kg CO2-eq']
[12]	Chemical	Unveiling environmental impacts of methanol production via electrocatalysis against conventional and thermochemical routes by life cycle assessment	Lin et al.	2023	https://doi.org/10.1016/j.susmat.2023.e00663	Table S4.	5, 6, 7	Electrochemical CO2 reduction pathway (with recycling)	Yes.	The inventory table includes CO2 capture, methanol synthesis and separation, and purification. Only record methanol synthesis, separation and purification and integrate them into a single table.	Methanol synthesis, separation and purification	Cradle-to-gate	1 kg of methanol	1	kg	methanol	Methanol	ReCiPe 2016 (H) V 1.03	['Global warming potential (GWP)', 'Terrestrial ecotoxicity (TE)', 'Human non-carcinogenic toxicity (HNC)', 'Fossil resource scarcity (FS)']	Global	['EC pathway: 64.40 kg CO2-eq', 'TC pathway: 87.53 kg CO2-eq reduction', 'EC pathway: 718.28 kg CO2-eq reduction', 'TC pathway powered by 100% hydropower: 4.09 kg CO2-eq']
[13]	Chemical	Exploring biomass addition in methanol production: A life cycle analysis of efficiency and environmental impacts	Liu et al.	2024	https://doi.org/10.1016/j.jclepro.2024.143072	Not provided	/	/	/	/	/	Cradle-to-gate	1 tonne of methanol	1	tonne	methanol	Methanol	CML 2001 and ReCiPe	['Abiotic resources depletion potential (ADP)', 'Acidification potential (AP)', 'Eutrophication potential (EP)', 'Global warming potential (GWP100)', 'Human toxicity potential (HTP)', 'Ozone layer depletion potential (ODP)', 'Photochemical ozone creation potential (POCP)', 'Freshwater aquatic ecosystems toxicity potential (FAETP)', 'Marine aquatic ecosystems toxicity potential (MAETP)', 'Terrestr…	Not mentioned	['B/F 0.3: GWP 100 decreased by 68.0%', 'B/F 0.5: GWP 100 decreased by 67.7%', 'B/F 0.7: GWP 100 decreased by 61.7%']
[14]	Chemical	Technoeconomic and Life Cycle Analysis of Synthetic Methanol Production from Hydrogen and Industrial Byproduct CO2	Zang et al.	2021	https://doi.org/10.1021/acs.est.0c08237	Not provided	/	/	/	/	/	Cradle-to-gate and Cradle-to-grave	1 MJ of methanol	1	MJ	methanol	Methanol	GREET 2020	['Global warming potential (GWP)']	United States	['Stand-alone methanol production: -55.7 g CO2-eq./MJ', 'Methanol-ethanol coproduction: -32.2 g CO2-eq./MJ', 'Methanol-ammonia coproduction: 14.2 g CO2-eq./MJ']
[15]	Chemical	Building an agent-based techno-economic assessment coupled with life cycle assessment of biomass to methanol supply chains	Nugroho et al.	2021	https://doi.org/10.1016/j.apenergy.2021.118449	Not provided	/	/	/	/	/	Cradle-to-gate	1 tonne of methanol	1	tonne	methanol	Methanol	Not mentioned	['Global warming potential (GWP)']	East Java, Indonesia	['Pathway 1: 2.53 CO2/metric tons methanol', 'Pathway 2: 5.6 CO2/metric tons methanol']
[16]	Chemical	Integrating life cycle assessment for design and optimization of methanol production from combining methane dry reforming and partial oxidation	Nguyen et al.	2021	https://doi.org/10.1016/j.jclepro.2021.125970	Not provided	/	/	/	/	/	Cradle-to-gate	1 kg of methanol	1	kg	methanol	Methanol	Not mentioned	['Global warming potential (GWP)', 'Ozone depletion', 'Terrestrial acidification']	Japan	['Methanol: 0.81 kg CO2-eq./kg']
[17]	Chemical	A techno-economic and life cycle assessment for the production of green methanol from CO2: catalyst and process bottlenecks	Cordero-Lanzac et al.	2022	https://doi.org/10.1016/j.jechem.2021.09.045	Not provided	/	/	/	/	/	Not mentioned	2.75E+08 kg methanol	275000000	kg	methanol	Methanol	Not mentioned	['Global warming potential (GWP)', 'Ozone depletion potential (ODP)', 'Land use (LU)', 'Water use (WU)', 'Human toxicity potential, cancer effects (HTC)', 'Resource use of minerals and metals (RDM)', 'Respiratory inorganics (RI)', 'Photochemical ozone formation (POF)', 'Acidification potential (AC)']	European Union	['Case 1: ~1.5 kg CO2-eq./kg MeOH', 'Case 2: 1.7 kg CO2-eq./kg MeOH']
[18]	Chemical	Alternative sustainable routes to methanol production: Techno-economic and environmental assessment	Scomazzon et al.	2024	https://doi.org/10.1016/j.jece.2024.112674	Not provided	/	/	/	/	/	Not mentioned	1 tonne of methanol	1	tonne	methanol	Methanol	Not mentioned	['Global warming potential (GWP)']	Europe	['Conventional process: 0.35 t CO2-e/t CH3OH', 'BR-to-methanol: -0.14 t CO2-e/t CH3OH', 'BSG-to-methanol: -0.91 t CO2-e/t CH3OH', 'CO2 hydrogenation (AW electrolysis): -1.21 t CO2-e/t CH3OH', 'CO2 hydrogenation (PEM electrolysis): -1.17 t CO2-e/t CH3OH']
[19]	Chemical	Life cycle assessment and economic analysis of methanol production from coke oven gas compared with coal and natural gas routes	Li et al.	2018	https://doi.org/10.1016/j.jclepro.2018.02.100	Table 2.	6	Coke oven gas (COG)-based pathway	Yes.	No separated activity. Extract the entire table	Methanol production	Cradle-to-gate	1 tonne of methanol	1	tonne	methanol	Methanol	CML 2001	['Abiotic depletion (ADP fossil)', 'Acidification potential (AP)', 'Eutrophication potential (EP)', 'Global warming potential (GWP 100 years)', 'Human toxicity potential (HTP inf.)', 'Photochemical ozone creation potential (POCP)']	China	['COG route: 1200.8 kg CO2-eq./t methanol', 'Coal route: 1643.5 kg CO2-eq./t methanol', 'Natural gas route: 915.4 kg CO2-eq./t methanol']
[19]	Chemical	Life cycle assessment and economic analysis of methanol production from coke oven gas compared with coal and natural gas routes	Li et al.	2018	https://doi.org/10.1016/j.jclepro.2018.02.100	Table 3.	6	Coal-based pathway	Yes.	No separated activity. Extract the entire table	Methanol production	Cradle-to-gate	1 tonne of methanol	1	tonne	methanol	Methanol	CML 2001	['Abiotic depletion (ADP fossil)', 'Acidification potential (AP)', 'Eutrophication potential (EP)', 'Global warming potential (GWP 100 years)', 'Human toxicity potential (HTP inf.)', 'Photochemical ozone creation potential (POCP)']	China	['COG route: 1200.8 kg CO2-eq./t methanol', 'Coal route: 1643.5 kg CO2-eq./t methanol', 'Natural gas route: 915.4 kg CO2-eq./t methanol']
[19]	Chemical	Life cycle assessment and economic analysis of methanol production from coke oven gas compared with coal and natural gas routes	Li et al.	2018	https://doi.org/10.1016/j.jclepro.2018.02.100	Table 4.	6	Natural gas-based pathway	Yes.	No separated activity. Extract the entire table	Methanol production	Cradle-to-gate	1 tonne of methanol	1	tonne	methanol	Methanol	CML 2001	['Abiotic depletion (ADP fossil)', 'Acidification potential (AP)', 'Eutrophication potential (EP)', 'Global warming potential (GWP 100 years)', 'Human toxicity potential (HTP inf.)', 'Photochemical ozone creation potential (POCP)']	China	['COG route: 1200.8 kg CO2-eq./t methanol', 'Coal route: 1643.5 kg CO2-eq./t methanol', 'Natural gas route: 915.4 kg CO2-eq./t methanol']
[20]	Chemical	LCA comparison analysis for two types of H2 carriers: Methanol and ammonia	Zhu et al.	2022	https://doi.org/10.1002/er.7947	Table S7.	4	Coal-CH3OH technical pathway	Yes.	The inventory table includes coal pretreatment, synthetic gas production, and methanol synthesis and purification. Only record methanol synthesis and purification.	Methanol synthesis and purification	Cradle-to-grave	1 tonne of methanol	1	tonne	methanol	Methanol	CML 2001	['Global warming potential (GWP)', 'Acidification potential', 'Ozone depletion potential', 'Photochemical ozone creation potential', 'Eutrophication potential', 'Abiotic depletion potential']	China	['Coal-CH3OH: 3.09 kg CO2-eq/kg', 'NG-CH3OH: 0.84 kg CO2-eq/kg', 'PV/CCU-CH3OH: 1.04 kg CO2-eq/kg', 'Coal-NH3: 3.93 kg CO2-eq/kg', 'NG-NH3: 2.70 kg CO2-eq/kg', 'PV-NH3: 0.78 kg CO2-eq/kg']
[20]	Chemical	LCA comparison analysis for two types of H2 carriers: Methanol and ammonia	Zhu et al.	2022	https://doi.org/10.1002/er.7947	Table S8.	5	NG-CH3OH technical pathway	Yes.	No separated activity. Extract the entire table	Methanol synthesis and purification	Cradle-to-grave	1 tonne of methanol	1	tonne	methanol	Methanol	CML 2001	['Global warming potential (GWP)', 'Acidification potential', 'Ozone depletion potential', 'Photochemical ozone creation potential', 'Eutrophication potential', 'Abiotic depletion potential']	China	['Coal-CH3OH: 3.09 kg CO2-eq/kg', 'NG-CH3OH: 0.84 kg CO2-eq/kg', 'PV/CCU-CH3OH: 1.04 kg CO2-eq/kg', 'Coal-NH3: 3.93 kg CO2-eq/kg', 'NG-NH3: 2.70 kg CO2-eq/kg', 'PV-NH3: 0.78 kg CO2-eq/kg']
[20]	Chemical	LCA comparison analysis for two types of H2 carriers: Methanol and ammonia	Zhu et al.	2022	https://doi.org/10.1002/er.7947	Table S9.	5	PV/CCU-CH3OH technical pathway	Yes.	The inventory table includes hydrogen generation, and methanol synthesis and purification. Only record methanol synthesis and purification.	Methanol synthesis and purification	Cradle-to-grave	1 tonne of methanol	1	tonne	methanol	Methanol	CML 2001	['Global warming potential (GWP)', 'Acidification potential', 'Ozone depletion potential', 'Photochemical ozone creation potential', 'Eutrophication potential', 'Abiotic depletion potential']	China	['Coal-CH3OH: 3.09 kg CO2-eq/kg', 'NG-CH3OH: 0.84 kg CO2-eq/kg', 'PV/CCU-CH3OH: 1.04 kg CO2-eq/kg', 'Coal-NH3: 3.93 kg CO2-eq/kg', 'NG-NH3: 2.70 kg CO2-eq/kg', 'PV-NH3: 0.78 kg CO2-eq/kg']
[21]	Chemical	Methanol Production from Solid Recovered Fuel and Lignite: Techno-Economic and Environmental Assessment	Rolfe et al.	2022	https://doi.org/10.1007/s12649-022-01757-2	Table 7.	16	Solid Recovered Fuel and Lignite to methanol pathway (case1)	Yes.	The inventory table includes gasifier cold scrub, shift reaction, acid gas removal, and methanol synthesis. Only record methanol synthesis. Fill syngas as an input.		Cradle-to-gate	1 kg of methanol	1	kg	methanol	Methanol	ReCiPe	['Global warming potential (GWP)', 'Stratospheric ozone depletion', 'Ionizing radiation', 'Ozone formation, Human health', 'Fine particulate matter formation', 'Ozone formation, Terrestrial ecosystems', 'Terrestrial acidification', 'Freshwater eutrophication', 'Marine eutrophication', 'Terrestrial ecotoxicity', 'Freshwater ecotoxicity', 'Marine ecotoxicity', 'Human carcinogenic toxicity', 'Human …	EU	['Case 1: 7.19 kg CO2-eq', 'Case 2: 6.21 kg CO2-eq', 'Case 3: 5.27 kg CO2-eq', 'Reformer: 1.32 kg CO2-eq']
[21]	Chemical	Methanol Production from Solid Recovered Fuel and Lignite: Techno-Economic and Environmental Assessment	Rolfe et al.	2022	https://doi.org/10.1007/s12649-022-01757-2	Table 8.	16	Solid Recovered Fuel and Lignite to methanol pathway (case2)	Yes.	The inventory table includes gasifier cold scrub, shift reaction, acid gas removal, and methanol synthesis. Only record methanol synthesis. Fill syngas as an input.		Cradle-to-gate	1 kg of methanol	1	kg	methanol	Methanol	ReCiPe	['Global warming potential (GWP)', 'Stratospheric ozone depletion', 'Ionizing radiation', 'Ozone formation, Human health', 'Fine particulate matter formation', 'Ozone formation, Terrestrial ecosystems', 'Terrestrial acidification', 'Freshwater eutrophication', 'Marine eutrophication', 'Terrestrial ecotoxicity', 'Freshwater ecotoxicity', 'Marine ecotoxicity', 'Human carcinogenic toxicity', 'Human …	EU	['Case 1: 7.19 kg CO2-eq', 'Case 2: 6.21 kg CO2-eq', 'Case 3: 5.27 kg CO2-eq', 'Reformer: 1.32 kg CO2-eq']
[21]	Chemical	Methanol Production from Solid Recovered Fuel and Lignite: Techno-Economic and Environmental Assessment	Rolfe et al.	2022	https://doi.org/10.1007/s12649-022-01757-2	Table 9.	17	Solid Recovered Fuel and Lignite to methanol pathway (case3)	Yes.	The inventory table includes gasifier cold scrub, shift reaction, acid gas removal, and methanol synthesis. Only record methanol synthesis. Fill syngas as an input.		Cradle-to-gate	1 kg of methanol	1	kg	methanol	Methanol	ReCiPe	['Global warming potential (GWP)', 'Stratospheric ozone depletion', 'Ionizing radiation', 'Ozone formation, Human health', 'Fine particulate matter formation', 'Ozone formation, Terrestrial ecosystems', 'Terrestrial acidification', 'Freshwater eutrophication', 'Marine eutrophication', 'Terrestrial ecotoxicity', 'Freshwater ecotoxicity', 'Marine ecotoxicity', 'Human carcinogenic toxicity', 'Human …	EU	['Case 1: 7.19 kg CO2-eq', 'Case 2: 6.21 kg CO2-eq', 'Case 3: 5.27 kg CO2-eq', 'Reformer: 1.32 kg CO2-eq']
[21]	Chemical	Methanol Production from Solid Recovered Fuel and Lignite: Techno-Economic and Environmental Assessment	Rolfe et al.	2022	https://doi.org/10.1007/s12649-022-01757-2	Table 10.	17	Natural gas to methanol pathway	Yes.	The inventory table includes reformer and methanol synthesis. Only record methanol synthesis. Fill syngas as an input.	Methanol production	Cradle-to-gate	1 kg of methanol	1	kg	methanol	Methanol	ReCiPe	['Global warming potential (GWP)', 'Stratospheric ozone depletion', 'Ionizing radiation', 'Ozone formation, Human health', 'Fine particulate matter formation', 'Ozone formation, Terrestrial ecosystems', 'Terrestrial acidification', 'Freshwater eutrophication', 'Marine eutrophication', 'Terrestrial ecotoxicity', 'Freshwater ecotoxicity', 'Marine ecotoxicity', 'Human carcinogenic toxicity', 'Human …	EU	['Case 1: 7.19 kg CO2-eq', 'Case 2: 6.21 kg CO2-eq', 'Case 3: 5.27 kg CO2-eq', 'Reformer: 1.32 kg CO2-eq']
[22]	Chemical	Transition into Net-Zero Carbon Community from Fossil Fuels: Life Cycle Assessment of Light-Driven CO2 Conversion to Methanol Using Graphitic Carbon Nitride	Ling et al.	2023	https://doi.org/10.1021/acssuschemeng.2c07375	Table 2.	4	Photocatalytic pathway	Yes.	The inventory table includes pretreatment, reaction, and purification. Only record reaction and purification.	Methanol production	Cradle-to-gate	1 kg of methanol	1	kg	methanol	Methanol	ReCiPe midpoint/endpoint (Hierarchist)	['Climate change (GWP)', 'Fossil depletion (FDP)', 'Agricultural land occupation (ALOP)', 'Freshwater ecotoxicity (FET)', 'Freshwater eutrophication (FEP)', 'Human toxicity (HTP)', 'Ionizing radiation (IRP)', 'Marine ecotoxicity (MET)', 'Marine eutrophication (MEP)', 'Metal depletion (MDP)', 'Natural land transformation (NLTP)', 'Ozone depletion (ODP)', 'Particulate matter formation (PMFP)', 'Pho…	Global	['Photocatalytic CH3OH system: 76.85 kg CO2-eq', 'Conventional CH3OH system: 339.00 kg CO2-eq', 'Photocatalytic CH3OH system with hydropower: 61 kg CO2-eq', 'Conventional CH3OH system with hydropower: 243 kg CO2-eq']
[22]	Chemical	Transition into Net-Zero Carbon Community from Fossil Fuels: Life Cycle Assessment of Light-Driven CO2 Conversion to Methanol Using Graphitic Carbon Nitride	Ling et al.	2023	https://doi.org/10.1021/acssuschemeng.2c07375	Table 2.	4	Conventional pathway (steam methane reforming)	Yes.	The inventory table includes pretreatment, reaction, and purification. Only record reaction and purification.	Methanol production	Cradle-to-gate	1 kg of methanol	1	kg	methanol	Methanol	ReCiPe midpoint/endpoint (Hierarchist)	['Climate change (GWP)', 'Fossil depletion (FDP)', 'Agricultural land occupation (ALOP)', 'Freshwater ecotoxicity (FET)', 'Freshwater eutrophication (FEP)', 'Human toxicity (HTP)', 'Ionizing radiation (IRP)', 'Marine ecotoxicity (MET)', 'Marine eutrophication (MEP)', 'Metal depletion (MDP)', 'Natural land transformation (NLTP)', 'Ozone depletion (ODP)', 'Particulate matter formation (PMFP)', 'Pho…	Global	['Photocatalytic CH3OH system: 76.85 kg CO2-eq', 'Conventional CH3OH system: 339.00 kg CO2-eq', 'Photocatalytic CH3OH system with hydropower: 61 kg CO2-eq', 'Conventional CH3OH system with hydropower: 243 kg CO2-eq']
[23]	Chemical	A Comprehensive Assessment of the Carbon Footprint of the Coal-to-Methanol Process Coupled with Carbon Capture-, Utilization-, and Storage-Enhanced Oil Recovery Technology	Li et al.	2024	https://doi.org/10.3390/su16093573	Table 2.	8	Coal-to-methanol pathway	Yes.	No separated activity. Extract the entire table	Methanol production	Cradle-to-gate	1 tonne of methanol	1	tonne	methanol	Methanol	Not mentioned	['Global warming potential (GWP)']	Xinjiang Autonomous Region, China	['Scenario 1: 2.63 t CO2-eq./tCH3OH', 'Scenario 2: 1.00 t CO2-eq./tCH3OH']
[24]	Chemical	A LCA (life cycle assessment) of the methanol production from sugarcane bagasse	Reno et al.	2011	https://doi.org/10.1016/j.energy.2010.12.010	Table 3 (input) & Table 4 (output).	6, 7	Sugarcane bagasse-based pathway	Yes.	The inventory table includes Sugarcane cultivation, harvesting and transportation, gasification, and Syngas conditioning +methanol synthesis. Only record Syngas conditioning+methanol synthesis.	Syngas conditioning and methanol synthesis	Cradle-to-gate	1 kg of methanol	1	kg	methanol	Methanol	CML 2001	['Abiotic depletion', 'Acidification', 'Eutrophication', 'Global warming potential (GWP)', 'Ozone layer depletion', 'Human toxicity', 'Fresh water aquatic ecotoxicity', 'Marine aquatic ecotoxicity', 'Terrestrial ecotoxicity', 'Land competition', 'Photochemical oxidation']	Brazil	['Methanol: 2.284 kg CO2-eq']
[25]	Chemical	Life Cycle Assessment of Bio-methanol Derived from Various Raw-materials	Galusnyak et al.	2021	https://doi.org/10.3303/CET2186112	Not provided	/	/	/	/	/	Cradle-to-gate	1 tonne of methanol	1	tonne	methanol	Methanol	ReCIPe	['Global warming potential (GWP)', 'Freshwater eutrophication potential (FEP)', 'Ozone depletion potential (ODP)', 'Fossil depletion potential (FDP)', 'Freshwater ecotoxicity potential (FETP)', 'Human toxicity potential (HTP)', 'Metal depletion potential (MDP)', 'Photochemical oxidant formation potential (POFP)', 'Terrestrial ecotoxicity potential (TETP)']	Not mentioned	['Case 1: 1,117.23 kg CO2-eq./t MeOH', 'Case 2: 6,253.08 kg CO2-eq./t MeOH', 'Case 3: 1,383.42 kg CO2-eq./t MeOH', 'Case 4: 435.13 kg CO2-eq./t MeOH', 'Case 5: 522.57 kg CO2-eq./t MeOH', 'Case 6: 848.77 kg CO2-eq./t MeOH', 'Case 7: 392.71 kg CO2-eq./t MeOH', 'Case 8: 1,311.25 kg CO2-eq./t MeOH']
[26]	Chemical	From Secondary Biomass to Bio-Methanol through CONVERGE Technology: An Environmental Analysis	Galusnyak et al.	2023	https://doi.org/10.3390/en16062726	Not provided	/	/	/	/	/	Cradle-to-gate	1 tonne of methanol	1	tonne	methanol	Methanol	ReCiPe	['Global warming potential (GWP)', 'Freshwater Eutrophication Potential (FEP)', 'Ozone Depletion Potential (ODP)', 'Fossil fuel Depletion Potential (FDP)', 'Freshwater Ecotoxicity Potential (FETP)', 'Human Toxicity Potential (HTP)', 'Mineral Depletion Potential (MDP)', 'Photochemical Oxidant Formation Potential (POFP)', 'Terrestrial Ecotoxicity Potential (TETP)']	Northern Sweden and Italy	['Case 1: 1436.19 kg CO2-eq./t MeOH', 'Case 2: 1288.04 kg CO2-eq./t MeOH', 'Case 3: 2511.22 kg CO2-eq./t MeOH']
[27]	Chemical	Techno-economic and environmental assessments for sustainable bio-methanol production as landfill gas valorization	Choe et al.	2022	https://doi.org/10.1016/j.wasman.2022.06.040	Not provided	/	/	/	/	/	Not mentioned	1 kg of methanol	1	kg	methanol	Methanol	Not mentioned	['Global warming potential (GWP)']	Korea	['Case 1: 2.36 kg CO2-eq/kg MeOH', 'Case 2: 0.835 kg CO2-eq/kg MeOH', 'Case 3: 0.605 kg CO2-eq/kg MeOH']
[28]	Chemical	Formic acid production through electrochemical reduction of CO2: A life cycle assessment	Banu et al.	2023	https://doi.org/10.1016/j.ecmx.2023.100441	Table 3.	4	CO2 electrochemical reduction pathway (Normalized)	Yes.	Extract the entire table. Fill formic acid as an output.	Formic acid production	Cradle-to-gate	1 kg of formic acid	1	kg	formic acid	Formic acid	ReCiPe 1.08 midpoint indicator	['Climate change (CC)', 'Terrestrial acidification (TA)', 'Freshwater eutrophication (FE)', 'Ozone depletion (OD)', 'Water depletion (WD)']	Not mentioned	['Base case: 3.27 kg CO2-eq/kg FA', 'Tap ground water: 3.16 kg CO2-eq/kg FA', 'Nuclear electricity: 0.163 kg CO2-eq/kg FA']
[29]	Chemical	Electrochemical production of formic acid from carbon dioxide: A life cycle assessment study	Kang et al.	2021	https://doi.org/10.1016/j.jece.2021.106130	Table S2.	3	Electrochemical (CO2-to-FA) based pathway	Yes.	Extract the entire table.	Formic acid production	Cradle-to-gate	1 kg of formic acid	1	kg	formic acid	Formic acid	ReCiPe 2008 midpoint (hierarchist perspective)	['Climate change', 'Ozone depletion', 'Terrestrial acidification', 'Freshwater eutrophication', 'Marine eutrophication', 'Human toxicity', 'Photochemical oxidant formation', 'Particulate matter formation', 'Terrestrial ecotoxicity', 'Freshwater ecotoxicity', 'Marine ecotoxicity', 'Ionizing radiation', 'Agricultural land occupation', 'Urban land occupation', 'Natural land transformation', 'Water d…	Republic of Korea	['Electrochemical CO2-to-FA reduction process: 1.502 kg CO2-eq./kg']
[29]	Chemical	Electrochemical production of formic acid from carbon dioxide: A life cycle assessment study	Kang et al.	2021	https://doi.org/10.1016/j.jece.2021.106130	Table S3.	3	Conventional (CO-to-FA) based pathway	Yes.	Extract the entire table.	Formic acid production	Cradle-to-gate	1 kg of formic acid	1	kg	formic acid	Formic acid	ReCiPe 2008 midpoint (hierarchist perspective)	['Climate change', 'Ozone depletion', 'Terrestrial acidification', 'Freshwater eutrophication', 'Marine eutrophication', 'Human toxicity', 'Photochemical oxidant formation', 'Particulate matter formation', 'Terrestrial ecotoxicity', 'Freshwater ecotoxicity', 'Marine ecotoxicity', 'Ionizing radiation', 'Agricultural land occupation', 'Urban land occupation', 'Natural land transformation', 'Water d…	Republic of Korea	['Electrochemical CO2-to-FA reduction process: 1.502 kg CO2-eq./kg']
[30]	Chemical	From Laboratory to Industrial Scale: A Prospective LCA for Electrochemical Reduction of CO2 to Formic Acid	Thonemann & Schulte	2019	https://doi.org/10.1021/acs.est.9b02944	Table 1.	5	CO2 electrochemical reduction pathway (lab-scale)	Yes.	No separated activity. Fill formic acid as an input.	Formic acid production	Cradle-to-gate	1 kg of formic acid	1	kg	formic acid	Formic acid	ILCD 1.0.8	['Climate change', 'Acidification', 'Ecotoxicity', 'Eutrophication (freshwater, marine, and terrestrial)', 'Ionizing radiation (ecosystem quality and human health)', 'Human toxicity (carcinogenic and non-carcinogenic effects)', 'Ozone depletion', 'Photochemical ozone formation', 'Particulate matter', 'Land use', 'Resource depletion']	Germany	['Lab-scale: 9325.0 kg CO2-eq/kg FA', 'Best case: -0.4 kg CO2-eq/kg FA', 'TCC scale-up: 6.5 kg CO2-eq/kg FA']
[30]	Chemical	From Laboratory to Industrial Scale: A Prospective LCA for Electrochemical Reduction of CO2 to Formic Acid	Thonemann & Schulte	2019	https://doi.org/10.1021/acs.est.9b02944	Table 1.	5	CO2 electrochemical reduction pathway (best case)	Yes.	No separated activity. Fill formic acid as an input.	Formic acid production	Cradle-to-gate	1 kg of formic acid	1	kg	formic acid	Formic acid	ILCD 1.0.8	['Climate change', 'Acidification', 'Ecotoxicity', 'Eutrophication (freshwater, marine, and terrestrial)', 'Ionizing radiation (ecosystem quality and human health)', 'Human toxicity (carcinogenic and non-carcinogenic effects)', 'Ozone depletion', 'Photochemical ozone formation', 'Particulate matter', 'Land use', 'Resource depletion']	Germany	['Lab-scale: 9325.0 kg CO2-eq/kg FA', 'Best case: -0.4 kg CO2-eq/kg FA', 'TCC scale-up: 6.5 kg CO2-eq/kg FA']
[31]	Chemical	System-level analysis and life cycle assessment of CO2 and fossil-based formic acid strategies	Ahn et al.	2019	https://doi.org/10.1039/C9GC01280J	Table 1.	5	Carbon capture and utilization (CCU) pathway	Yes.	Extract the entire table.	Formic acid production	Cradle-to-gate	1 kg of formic acid	1	kg	formic acid	Formic acid	ReCiPe 1.13 Hierarchist	['Climate change (CC)', 'Ozone depletion', 'Terrestrial acidification', 'Freshwater eutrophication', 'Marine eutrophication', 'Human toxicity', 'Photochemical oxidant formation', 'Particulate matter formation', 'Terrestrial ecotoxicity', 'Freshwater ecotoxicity', 'Marine ecotoxicity', 'Ionising radiation', 'Agricultural land occupation', 'Urban land occupation', 'Natural land transformation', 'Wa…	Jeollanam-do industrial sector, Republic of Korea	['Conventional process: 2.007 kg CO2-eq.', 'CCU process: 0.098 kg CO2-eq.']
[31]	Chemical	System-level analysis and life cycle assessment of CO2 and fossil-based formic acid strategies	Ahn et al.	2019	https://doi.org/10.1039/C9GC01280J	Table 1.	5	Conventional fossil-based pathway	Yes.	Extract the entire table.	Formic acid production	Cradle-to-gate	1 kg of formic acid	1	kg	formic acid	Formic acid	ReCiPe 1.13 Hierarchist	['Climate change (CC)', 'Ozone depletion', 'Terrestrial acidification', 'Freshwater eutrophication', 'Marine eutrophication', 'Human toxicity', 'Photochemical oxidant formation', 'Particulate matter formation', 'Terrestrial ecotoxicity', 'Freshwater ecotoxicity', 'Marine ecotoxicity', 'Ionising radiation', 'Agricultural land occupation', 'Urban land occupation', 'Natural land transformation', 'Wa…	Jeollanam-do industrial sector, Republic of Korea	['Conventional process: 2.007 kg CO2-eq.', 'CCU process: 0.098 kg CO2-eq.']
[32]	Chemical	Environmental assessment of thermo-chemical processes for bio-ethylene production in comparison with bio-chemical and fossil-based ethylene	Alonso-FariÃ±as et al.	2018	https://doi.org/10.1016/j.jclepro.2018.08.147	Table 2.	8	Direct ethanol dehydration	Yes.	Extract the entire table.	Ethylene production	Cradle-to-gate	1 t of ethylene	1	t	ethylene	Ethylene	CML 2	['Abiotic depletion potential of elements (ADP elements)', 'Abiotic depletion potential of fossil fuel resources (ADP fossil)', 'Global warming potential (GWP)', 'Ozone depletion potential (ODP)', 'Human toxicity potential (HTP)', 'Freshwater aquatic ecotoxicity potential (FAETP)', 'Marine aquatic ecotoxicity potential (MAETP)', 'Terrestrial ecotoxicity potential (TETP)', 'Photochemical oxidants …	Duero Valley (Castilla y Leon, Spain)	['Case 3: -0.07 t CO2-eq./kg (GWP)']
[32]	Chemical	Environmental assessment of thermo-chemical processes for bio-ethylene production in comparison with bio-chemical and fossil-based ethylene	Alonso-FariÃ±as et al.	2018	https://doi.org/10.1016/j.jclepro.2018.08.147	Table 2.	8	Indirect ethanol dehydration	Yes.	Extract the entire table.	Ethylene production	Cradle-to-gate	1 t of ethylene	1	t	ethylene	Ethylene	CML 2	['Abiotic depletion potential of elements (ADP elements)', 'Abiotic depletion potential of fossil fuel resources (ADP fossil)', 'Global warming potential (GWP)', 'Ozone depletion potential (ODP)', 'Human toxicity potential (HTP)', 'Freshwater aquatic ecotoxicity potential (FAETP)', 'Marine aquatic ecotoxicity potential (MAETP)', 'Terrestrial ecotoxicity potential (TETP)', 'Photochemical oxidants …	Duero Valley (Castilla y Leon, Spain)	['Case 3: -0.07 t CO2-eq./kg (GWP)']
[32]	Chemical	Environmental assessment of thermo-chemical processes for bio-ethylene production in comparison with bio-chemical and fossil-based ethylene	Alonso-FariÃ±as et al.	2018	https://doi.org/10.1016/j.jclepro.2018.08.147	Table 2.	8	Dimethyl ether to olefins	Yes.	Extract the entire table.	Ethylene production	Cradle-to-gate	1 t of ethylene	1	t	ethylene	Ethylene	CML 2	['Abiotic depletion potential of elements (ADP elements)', 'Abiotic depletion potential of fossil fuel resources (ADP fossil)', 'Global warming potential (GWP)', 'Ozone depletion potential (ODP)', 'Human toxicity potential (HTP)', 'Freshwater aquatic ecotoxicity potential (FAETP)', 'Marine aquatic ecotoxicity potential (MAETP)', 'Terrestrial ecotoxicity potential (TETP)', 'Photochemical oxidants …	Duero Valley (Castilla y Leon, Spain)	['Case 3: -0.07 t CO2-eq./kg (GWP)']
[33]	Chemical	Life cycle assessment of corn- and cassava-based ethylene production	Hong et al.	2014	https://doi.org/10.1016/j.biombioe.2014.05.014	Not provided	/	/	/	/	/	Cradle-to-gate	1 t of ethylene	1	t	ethylene	Ethylene	IMPACT2002+ and ReCiPe	['Global warming potential (GWP)', 'Respiratory inorganics', 'Land occupation', 'Non-renewable energy', 'Ozone layer depletion', 'Aquatic acidification', 'Aquatic eutrophication', 'Terrestrial acidification/nutrification', 'Human health', 'Ecosystem quality', 'Climate change', 'Resources depletion']	China	['Cassava-based scenario: 4.3 to 7.4 t CO2-eq', 'Corn-based scenario: 2.7 to 4.1 t CO2-eq']
[34]	Chemical	Life cycle assessment of ethylene production from empty fruit bunch	Akmalina and Pawitra.	2020	https://doi.org/10.1002/apj.2436	Table 1.	4	Empty fruit bunch (EFB)-based pathway	Yes.	The inventory table includes pretreatment and saccharification, fermentation and ethanol purification, and ethylene production. Only ethylene production.		Cradle-to-gate	1 kg of ethylene	1	kg	ethylene	Ethylene	CML-impact assessment baseline methodology	['Global warming potential (GWP)', 'Ozone depletion potential', 'Photochemical oxidant creation potential', 'Acidification potential', 'Eutrophication potential']	Not mentioned	['Bioethylene: 1.15 kg CO2-eq/kg']
[35]	Chemical	Life cycle assessment of plasma-assisted ethylene production from rich-in-methane gas streams	Delikonstantis et al.	2020	https://doi.org/10.1039/C9SE00736A	Not provided	/	/	/	/	/	Cradle-to-gate	1 kg of ethylene	1	kg	ethylene	Ethylene	Not mentioned	['Global warming potential (GWP)']	Not mentioned	['One-step process, total purge flaring, grid electricity: 9.8 kg CO2-eq./kg', 'One-step process, partial purge flaring, WT electricity: 1.6 kg CO2-eq./kg', 'Two-step process, no purge flaring, WT electricity: 1.3 kg CO2-eq./kg', 'Two-step process, scenario 6: ~0.4 kg CO2-eq./kg', 'Shale gas feedstock: ~0.6 kg CO2-eq./kg', 'Natural gas feedstock: ~0.8 kg CO2-eq./kg', 'Conventional naphtha crackin…
[36]	Chemical	Comparative life cycle analysis on ethylene production from electrocatalytic reduction of carbon dioxide	Kim and Benavides.	2024	https://doi.org/10.1016/j.jclepro.2024.141348	Table 2.	5	CO2-to-ethylene (cascade conversion)	Yes.	Extract the entire table.	Ethylene production	Cradle-to-gate	1 kg of ethylene	1	kg	ethylene	Ethylene	GREET model	['Global warming potential (GWP)', 'Water consumption', 'Fossil-fuel consumption']	United States	['Cascade: 18 kgCO2-e/kg', 'S-MEA: 32 kgCO2-e/kg', 'S-Alkaline: 56 kgCO2-e/kg', 'Cascade with renewable wind power: -3.1 to -1.7 kgCO2-e/kg', 'S-MEA with renewable wind power: -3.1 to -1.7 kgCO2-e/kg', 'S-Alkaline with renewable wind power: -3.1 to -1.6 kgCO2-e/kg']
[36]	Chemical	Comparative life cycle analysis on ethylene production from electrocatalytic reduction of carbon dioxide	Kim and Benavides.	2024	https://doi.org/10.1016/j.jclepro.2024.141348	Table 2.	5	CO2-to-ethylene (MEA single-step)	Yes.	Extract the entire table.	Ethylene production	Cradle-to-gate	1 kg of ethylene	1	kg	ethylene	Ethylene	GREET model	['Global warming potential (GWP)', 'Water consumption', 'Fossil-fuel consumption']	United States	['Cascade: 18 kgCO2-e/kg', 'S-MEA: 32 kgCO2-e/kg', 'S-Alkaline: 56 kgCO2-e/kg', 'Cascade with renewable wind power: -3.1 to -1.7 kgCO2-e/kg', 'S-MEA with renewable wind power: -3.1 to -1.7 kgCO2-e/kg', 'S-Alkaline with renewable wind power: -3.1 to -1.6 kgCO2-e/kg']
[36]	Chemical	Comparative life cycle analysis on ethylene production from electrocatalytic reduction of carbon dioxide	Kim and Benavides.	2024	https://doi.org/10.1016/j.jclepro.2024.141348	Table 2.	5	CO2-to-ethylene (Alkaline single-step)	Yes.	Extract the entire table.	Ethylene production	Cradle-to-gate	1 kg of ethylene	1	kg	ethylene	Ethylene	GREET model	['Global warming potential (GWP)', 'Water consumption', 'Fossil-fuel consumption']	United States	['Cascade: 18 kgCO2-e/kg', 'S-MEA: 32 kgCO2-e/kg', 'S-Alkaline: 56 kgCO2-e/kg', 'Cascade with renewable wind power: -3.1 to -1.7 kgCO2-e/kg', 'S-MEA with renewable wind power: -3.1 to -1.7 kgCO2-e/kg', 'S-Alkaline with renewable wind power: -3.1 to -1.6 kgCO2-e/kg']
[37]	Chemical	Manufacturing Ethylene from Wet Shale Gas and Biomass: Comparative Technoeconomic Analysis and Environmental Life Cycle Assessment	Yang et al.	2018	https://doi.org/10.1021/acs.iecr.7b03731	Table 1.	8	Shale-gas-based pathway	Yes.	The inventory table includes shale gas processing and ethylene production. Only ethylene production.	Ethylene production	Cradle-to-gate	1 kg of ethylene	1	kg	ethylene	Ethylene	Not mentioned	['Global warming potential (GWP)']	Not mentioned	['Shale-gas-based pathway: 1.4 kg CO2-eq./kg', 'Corn-stover-based pathway: -1.0 kg CO2-eq./kg']
[37]	Chemical	Manufacturing Ethylene from Wet Shale Gas and Biomass: Comparative Technoeconomic Analysis and Environmental Life Cycle Assessment	Yang et al.	2018	https://doi.org/10.1021/acs.iecr.7b03731	Table 1.	8	Corn-stover-based pathway	Yes.	The inventory table includes bioethanol production and ethylene production. Only ethylene production.	Ethylene production	Cradle-to-gate	1 kg of ethylene	1	kg	ethylene	Ethylene	Not mentioned	['Global warming potential (GWP)']	Not mentioned	['Shale-gas-based pathway: 1.4 kg CO2-eq./kg', 'Corn-stover-based pathway: -1.0 kg CO2-eq./kg']
[37]	Chemical	Manufacturing Ethylene from Wet Shale Gas and Biomass: Comparative Technoeconomic Analysis and Environmental Life Cycle Assessment	Yang et al.	2018	https://doi.org/10.1021/acs.iecr.7b03731	Table 1.	8	Corn-grain-based pathway	Yes.	The inventory table includes bioethanol production and ethylene production. Only ethylene production.	Ethylene production	Cradle-to-gate	1 kg of ethylene	1	kg	ethylene	Ethylene	Not mentioned	['Global warming potential (GWP)']	Not mentioned	['Shale-gas-based pathway: 1.4 kg CO2-eq./kg', 'Corn-stover-based pathway: -1.0 kg CO2-eq./kg']
[38]	Chemical	LCA of electrochemical reduction of CO2 to ethylene	Khoo et al.	2020	https://doi.org/10.1016/j.jcou.2020.101229	Table 1	3	CO2 reduction reaction (RR) pathway (small-scale)	Yes.	Extract the entire table.	Ethylene production	Cradle-to-gate	1 g of ethylene	1	g	ethylene	Ethylene	CML 2001	['Global warming potential (GWP)', 'Acidification potential (AP)', 'Eutrophication potential (EP)', 'Human toxicity potential (HTP)', 'Photochemical ozone creation potential (POCP)']	Singapore	['Small-scale S-1: 3.6 g CO2-eq', 'Small-scale S-2: -3.70 g CO2-eq', 'Small-scale S-3: -0.98 g CO2-eq', 'Large-scale L-2: 3.0 t CO2-eq', 'Large-scale L-3: 0.651 t CO2-eq']
[38]	Chemical	LCA of electrochemical reduction of CO2 to ethylene	Khoo et al.	2020	https://doi.org/10.1016/j.jcou.2020.101229	Table 2.	4	CO2 reduction reaction (RR) pathway (large-scale)	Yes.	Extract the entire table.	Ethylene production	Cradle-to-gate	1 t of ethylene	1	t	ethylene	Ethylene	CML 2001	['Global warming potential (GWP)', 'Acidification potential (AP)', 'Eutrophication potential (EP)', 'Human toxicity potential (HTP)', 'Photochemical ozone creation potential (POCP)']	Singapore	['Small-scale S-1: 3.6 g CO2-eq', 'Small-scale S-2: -3.70 g CO2-eq', 'Small-scale S-3: -0.98 g CO2-eq', 'Large-scale L-2: 3.0 t CO2-eq', 'Large-scale L-3: 0.651 t CO2-eq']
[39]	Chemical	Life cycle assessment of biomass-based ethylene production in Sweden - is gasification or fermentation the environmentally preferable route?	Liptow et al.	2015	10.1007/s11367-015-0855-1	Table S4.	8	Methanol-to-olefin (MTO) pathway	Yes.	Extract the entire table.	Ethylene production	Cradle-to-gate	500,00 t of ethylene	50000	t	ethylene	Ethylene	Not mentioned	['Global warming potential (GWP)', 'Acidification (ACP)', 'Eutrophication (EP)', 'Photochemical ozone creation (POCP)']	Sweden	['GROT scenario: Not mentioned', 'Mixed wood scenario: Not mentioned']
[39]	Chemical	Life cycle assessment of biomass-based ethylene production in Sweden - is gasification or fermentation the environmentally preferable route?	Liptow et al.	2015	10.1007/s11367-015-0855-1	Table S6.	12	Sugarcane fermentation pathway	Yes.	Extract the entire table.	Ethylene production	Cradle-to-gate	500,00 t of ethylene	50000	t	ethylene	Ethylene	Not mentioned	['Global warming potential (GWP)', 'Acidification (ACP)', 'Eutrophication (EP)', 'Photochemical ozone creation (POCP)']	Sweden	['GROT scenario: Not mentioned', 'Mixed wood scenario: Not mentioned']
[39]	Chemical	Life cycle assessment of biomass-based ethylene production in Sweden - is gasification or fermentation the environmentally preferable route?	Liptow et al.	2015	10.1007/s11367-015-0855-1	Table S8.	16	Wood Fermentation pathway	Yes.	Extract the entire table.	Ethylene production	Cradle-to-gate	500,00 t of ethylene	50000	t	ethylene	Ethylene	Not mentioned	['Global warming potential (GWP)', 'Acidification (ACP)', 'Eutrophication (EP)', 'Photochemical ozone creation (POCP)']	Sweden	['GROT scenario: Not mentioned', 'Mixed wood scenario: Not mentioned']
[40]	Chemical	Unpacking bio-based alternatives to ethylene production in Brazil, Europe, and the United States: A comparative life cycle assessment	Zanon-Zotin et al.	2023	https://doi.org/10.1016/j.jclepro.2023.139376	Table S5.	12	LPG steam cracking	Yes.	Extract the entire table. Fill LPG as an input flow.	Ethylene production	Cradle-to-gate	1 kg of ethylene	1	kg	ethylene	Ethylene	IPCC Working Group I Sixth Assessment Report (GWP 100)	['Global warming potential (GWP)', 'Eutrophication', 'Acidification', 'Human toxicity', 'Photochemical ozone formation']	Brazil, Europe, US	['Sugarcane ethanol dehydration: 1.04 kg CO2-eq./kg ethylene', 'Propane steam cracking with processed beef tallow via HEFA: 17.10 kg CO2-eq./kg ethylene', 'Sugarcane ethanol dehydration with CO2 storage: -2.10 kg CO2-eq./kg ethylene', 'Propane steam cracking with processed beef tallow via HEFA with CO2 storage: 13.97 kg CO2-eq./kg ethylene']
[40]	Chemical	Unpacking bio-based alternatives to ethylene production in Brazil, Europe, and the United States: A comparative life cycle assessment	Zanon-Zotin et al.	2023	https://doi.org/10.1016/j.jclepro.2023.139376	Table S5.	12	Naphtha steam cracking	Yes.	Extract the entire table. Fill naphtha as an input flow.	Ethylene production	Cradle-to-gate	1 kg of ethylene	1	kg	ethylene	Ethylene	IPCC Working Group I Sixth Assessment Report (GWP 100)	['Global warming potential (GWP)', 'Eutrophication', 'Acidification', 'Human toxicity', 'Photochemical ozone formation']	Brazil, Europe, US	['Sugarcane ethanol dehydration: 1.04 kg CO2-eq./kg ethylene', 'Propane steam cracking with processed beef tallow via HEFA: 17.10 kg CO2-eq./kg ethylene', 'Sugarcane ethanol dehydration with CO2 storage: -2.10 kg CO2-eq./kg ethylene', 'Propane steam cracking with processed beef tallow via HEFA with CO2 storage: 13.97 kg CO2-eq./kg ethylene']
[40]	Chemical	Unpacking bio-based alternatives to ethylene production in Brazil, Europe, and the United States: A comparative life cycle assessment	Zanon-Zotin et al.	2023	https://doi.org/10.1016/j.jclepro.2023.139376	Table S5.	12	Gasoil steam cracking	Yes.	Extract the entire table. Fill gasoil as an input flow.	Ethylene production	Cradle-to-gate	1 kg of ethylene	1	kg	ethylene	Ethylene	IPCC Working Group I Sixth Assessment Report (GWP 100)	['Global warming potential (GWP)', 'Eutrophication', 'Acidification', 'Human toxicity', 'Photochemical ozone formation']	Brazil, Europe, US	['Sugarcane ethanol dehydration: 1.04 kg CO2-eq./kg ethylene', 'Propane steam cracking with processed beef tallow via HEFA: 17.10 kg CO2-eq./kg ethylene', 'Sugarcane ethanol dehydration with CO2 storage: -2.10 kg CO2-eq./kg ethylene', 'Propane steam cracking with processed beef tallow via HEFA with CO2 storage: 13.97 kg CO2-eq./kg ethylene']
[40]	Chemical	Unpacking bio-based alternatives to ethylene production in Brazil, Europe, and the United States: A comparative life cycle assessment	Zanon-Zotin et al.	2023	https://doi.org/10.1016/j.jclepro.2023.139376	Table S5.	12	Ethanol dehydration	Yes.	Extract the entire table. Fill ethanol as an input flow.	Ethylene production	Cradle-to-gate	1 kg of ethylene	1	kg	ethylene	Ethylene	IPCC Working Group I Sixth Assessment Report (GWP 100)	['Global warming potential (GWP)', 'Eutrophication', 'Acidification', 'Human toxicity', 'Photochemical ozone formation']	Brazil, Europe, US	['Sugarcane ethanol dehydration: 1.04 kg CO2-eq./kg ethylene', 'Propane steam cracking with processed beef tallow via HEFA: 17.10 kg CO2-eq./kg ethylene', 'Sugarcane ethanol dehydration with CO2 storage: -2.10 kg CO2-eq./kg ethylene', 'Propane steam cracking with processed beef tallow via HEFA with CO2 storage: 13.97 kg CO2-eq./kg ethylene']
[41]	Chemical	Electrified steam cracking for a carbon neutral ethylene production process: Techno-economic analysis, life cycle assessment, and analytic hierarchy process	Gu et al.	2022	https://doi.org/10.1016/j.enconman.2022.116256	Not provided	/	/	/	/	/	Cradle-to-gate	1 kg of ethylene	1	kg	ethylene	Ethylene	GREET	['Global warming potential (GWP)']	Not mentioned	['Case 1: 3.439 kg CO2-eq/kg', 'Case 2: 3.731 kg CO2-eq/kg', 'Case 3: 3.445 kg CO2-eq/kg', 'Case 4: 3.259 kg CO2-eq/kg', 'Case 5: 3.210 kg CO2-eq/kg', 'Case 6: 3.210 kg CO2-eq/kg', 'Case 7: 3.210 kg CO2-eq/kg', 'Case 8: 4.351 kg CO2-eq/kg', 'Case 9: 6.275 kg CO2-eq/kg', 'Case 10: 4.391 kg CO2-eq/kg', 'Case 11: 3.167 kg CO2-eq/kg', 'Case 12: 2.842 kg CO2-eq/kg', 'Case 13: 2.842 kg CO2-eq/kg', 'Cas…
[42]	Chemical	Environmental impacts of ethylene production from diverse feedstocks and energy sources	Ghanta et al.	2014	10.1007/s13203-013-0029-7	Not provided	/	/	/	/	/	Cradle-to-gate	400,000 t of ethylene	400000	t	ethylene	Ethylene	TRACI	['Acidification', 'Greenhouse gas emissions', 'Ecotoxicity', 'Human health cancer', 'Human health non-cancer', 'Eutrophication', 'Ozone depletion potential', 'Smog formation']	USA	['Naphtha: 198 kg CO2-eq.', 'Ethane: 167 kg CO2-eq.', 'Ethanol: 268 kg CO2-eq.']
[43]	Chemical	Environmental sustainability assessment of an ethylene oxide production process through Cumulative Exergy Demand and ReCiPe	Ghannadzadeh & Meymivand	2019	https://doi.org/10.1007/s10098-019-01748-3	Table S1.	2	Fossil fuel-to-EO pathway	Yes.	Extract the entire table.	Ethylene oxide production	Cradle-to-gate	1 kg of ethylene oxide	1	kg	ethylene oxide	Ethylene oxide	ReCiPe 2008	['Climate change (CC)', 'Marine ecotoxicity (ME)', 'Human health (HH)', 'Photochemical oxidant formation (POF)', 'Fossil depletion (FD)', 'Particulate matter formation (PMF)', 'Terrestrial acidification (TA)', 'Terrestrial ecotoxicity (TE)', 'Freshwater ecotoxicity (FE)', 'Ozone depletion (OD)']	US	['Scenario 1: 9.47Eâˆ’09 SY', 'Scenario 2: 9.39Eâˆ’09 SY', 'Scenario 7: 7.36Eâˆ’09 SY']
[44]	Chemical	Life cycle assessment of a novel electrocatalytic process for the production of bulk chemical ethylene oxide from biogenic CO2	Rodin et al.	2022	https://doi.org/10.3389/frsus.2022.799389	Table 1.	7	CO2-based pathway (2030 scenario)	Yes.	Extract the entire table.	Ethylene oxide production	Cradle-to-gate	1 kg of ethylene oxide	1	kg	ethylene oxide	Ethylene oxide	CML 2001	['Global warming potential (GWP)', 'Primary energy demand (PED)', 'Photochemical ozone creation potential (POCP)', 'Ozone layer depletion potential (ODP)', 'Acidification potential (AP)', 'Eutrophication potential (EP)', 'Fresh water Aquatic Ecotoxicity Potential (FAETP)', 'Marine Aquatic Ecotoxicity Potential (MAETP)', 'Human Toxicity Potential (HTP)', 'Terrestric Ecotoxicity Potential (TETP)', …	Europe	['Optimized process conditions: -0.5 kg CO2-eq./kg product', 'European grid mix: 3.62 kg CO2-eq./kg EO', 'H2O2-based approach: 4.11 kg CO2-eq./kg EO']
[44]	Chemical	Life cycle assessment of a novel electrocatalytic process for the production of bulk chemical ethylene oxide from biogenic CO2	Rodin et al.	2022	https://doi.org/10.3389/frsus.2022.799389	Table 1.	7	CO2-based pathway (2040 scenario)	Yes.	Extract the entire table.	Ethylene oxide production	Cradle-to-gate	1 kg of ethylene oxide	1	kg	ethylene oxide	Ethylene oxide	CML 2001	['Global warming potential (GWP)', 'Primary energy demand (PED)', 'Photochemical ozone creation potential (POCP)', 'Ozone layer depletion potential (ODP)', 'Acidification potential (AP)', 'Eutrophication potential (EP)', 'Fresh water Aquatic Ecotoxicity Potential (FAETP)', 'Marine Aquatic Ecotoxicity Potential (MAETP)', 'Human Toxicity Potential (HTP)', 'Terrestric Ecotoxicity Potential (TETP)', …	Europe	['Optimized process conditions: -0.5 kg CO2-eq./kg product', 'European grid mix: 3.62 kg CO2-eq./kg EO', 'H2O2-based approach: 4.11 kg CO2-eq./kg EO']
[45]	Chemical	Comparative Life Cycle Assessment of Energy Consumption, Pollutant Emission, and Cost Analysis of Coal/Oil/Biomass to Ethylene Glycol	Xu et al.	2021	https://doi.org/10.1021/acssuschemeng.1c05454	Table 2.	4	Coal-to-EG (CtEG) pathway	Yes.	The inventory table includes coal mining and processing, coal transportation, and coal to EG. Only include ethylene glycol production.	Ethylene glycol production	Cradle-to-gate	1 t of ethylene glycol	1	t	ethylene glycol	Ethylene glycol	Not mentioned	['Global warming potential (GWP)', 'Acidification potential (AP)', 'Photochemical ozone creation potential (POCP)', 'Nutrient enrichment (NE)', 'Soot and ashes (SA)']	China	['CtEG: 7538 kg CO2-eq/t-EG']
[45]	Chemical	Comparative Life Cycle Assessment of Energy Consumption, Pollutant Emission, and Cost Analysis of Coal/Oil/Biomass to Ethylene Glycol	Xu et al.	2021	https://doi.org/10.1021/acssuschemeng.1c05454	Table 3.	4	Oil-to-EG (OtEG) pathway	Yes.	The inventory table includes oil mining and processing, oil transportation, and oil to EG. Only include ethylene glycol production.	Ethylene glycol production	Cradle-to-gate	1 t of ethylene glycol	1	t	ethylene glycol	Ethylene glycol	Not mentioned	['Global warming potential (GWP)', 'Acidification potential (AP)', 'Photochemical ozone creation potential (POCP)', 'Nutrient enrichment (NE)', 'Soot and ashes (SA)']	China	['CtEG: 7538 kg CO2-eq/t-EG']
[45]	Chemical	Comparative Life Cycle Assessment of Energy Consumption, Pollutant Emission, and Cost Analysis of Coal/Oil/Biomass to Ethylene Glycol	Xu et al.	2021	https://doi.org/10.1021/acssuschemeng.1c05454	Table 4.	5	Biomass-to-EG (BtEG) pathway	Yes.	The inventory table includes biomass production, biomass transportation, and biomass to EG. Only include ethylene glycol production.	Ethylene glycol production	Cradle-to-gate	1 t of ethylene glycol	1	t	ethylene glycol	Ethylene glycol	Not mentioned	['Global warming potential (GWP)', 'Acidification potential (AP)', 'Photochemical ozone creation potential (POCP)', 'Nutrient enrichment (NE)', 'Soot and ashes (SA)']	China	['CtEG: 7538 kg CO2-eq/t-EG']
[46]	Chemical	Advancing development of biochemicals through the comprehensive evaluation of bio-ethylene glycol	Zhao et al.	2021	https://doi.org/10.1016/j.cej.2021.128516	Table S5.	17	Petro EG	Yes.	Extract the entire table. Fill ethylene glycol as an output.	Ethylene glycol production	Not mentioned	1 t of ethylene glycol	1	t	ethylene glycol	Ethylene glycol	Not mentioned	['Global warming potential (GWP)']	China	['Bio-EG: 0.8 t CO2-eq', 'Petro-EG: Not mentioned', 'Coal-EG: Not mentioned']
[46]	Chemical	Advancing development of biochemicals through the comprehensive evaluation of bio-ethylene glycol	Zhao et al.	2021	https://doi.org/10.1016/j.cej.2021.128516	Table S5.	17	Coal EG	Yes.	Extract the entire table. Fill ethylene glycol as an output.	Ethylene glycol production	Not mentioned	1 t of ethylene glycol	1	t	ethylene glycol	Ethylene glycol	Not mentioned	['Global warming potential (GWP)']	China	['Bio-EG: 0.8 t CO2-eq', 'Petro-EG: Not mentioned', 'Coal-EG: Not mentioned']
[47]	Chemical	Production routes to bio-acetic acid: life cycle assessment	Budsberg et al.	2020	https://doi.org/10.1186/s13068-020-01784-y	Table 5.	12	Lignocellulosic biomass-based pathway (EAX OC)	Yes.	Extract the entire table.	Acetic acid production	Cradle-to-gate	1 t of acetic acid	1	t	acetic acid	Acetic acid	Not mentioned	['Global warming potential (GWP)', 'Fossil fuel use (FFU)']	United States	['EAX OC: 1000 kg CO2-eq./t', 'EAX LE: 2500 kg CO2-eq./t', 'ADX OC: -370 kg CO2-eq./t', 'ADX LE: 180 kg CO2-eq./t']
[47]	Chemical	Production routes to bio-acetic acid: life cycle assessment	Budsberg et al.	2020	https://doi.org/10.1186/s13068-020-01784-y	Table 5.	12	Lignocellulosic biomass-based pathway (EAX LE)	Yes.	Extract the entire table.	Acetic acid production	Cradle-to-gate	1 t of acetic acid	1	t	acetic acid	Acetic acid	Not mentioned	['Global warming potential (GWP)', 'Fossil fuel use (FFU)']	United States	['EAX OC: 1000 kg CO2-eq./t', 'EAX LE: 2500 kg CO2-eq./t', 'ADX OC: -370 kg CO2-eq./t', 'ADX LE: 180 kg CO2-eq./t']
[47]	Chemical	Production routes to bio-acetic acid: life cycle assessment	Budsberg et al.	2020	https://doi.org/10.1186/s13068-020-01784-y	Table 5.	12	Lignocellulosic biomass-based pathway (ADX OC)	Yes.	Extract the entire table.	Acetic acid production	Cradle-to-gate	1 t of acetic acid	1	t	acetic acid	Acetic acid	Not mentioned	['Global warming potential (GWP)', 'Fossil fuel use (FFU)']	United States	['EAX OC: 1000 kg CO2-eq./t', 'EAX LE: 2500 kg CO2-eq./t', 'ADX OC: -370 kg CO2-eq./t', 'ADX LE: 180 kg CO2-eq./t']
[47]	Chemical	Production routes to bio-acetic acid: life cycle assessment	Budsberg et al.	2020	https://doi.org/10.1186/s13068-020-01784-y	Table 5.	12	Lignocellulosic biomass-based pathway (ADX LE)	Yes.	Extract the entire table.	Acetic acid production	Cradle-to-gate	1 t of acetic acid	1	t	acetic acid	Acetic acid	Not mentioned	['Global warming potential (GWP)', 'Fossil fuel use (FFU)']	United States	['EAX OC: 1000 kg CO2-eq./t', 'EAX LE: 2500 kg CO2-eq./t', 'ADX OC: -370 kg CO2-eq./t', 'ADX LE: 180 kg CO2-eq./t']
[48]	Chemical	Classical and Process Intensification Methods for Acetic Acid Concentration: Technical and Environmental Assessment	Petrescu and Cormos.	2022	https://doi.org/10.3390/en15218119	Not provided	/	/	/	/	/	Cradle-to-gate	1 kg of acetic acid	1	kg	acetic acid	Acetic acid	ReCiPe	['Global warming potential (GWP)', 'Fossil depletion potential (FDP)', 'Terrestrial ecotoxicity potential (TETP)', 'Freshwater eutrophication potential (FEP)', 'Water depletion potential (WDP)', 'Ozone depletion potential (ODP)', 'Human toxicity potential (HTP)', 'Marine eutrophication potential (MEP)', 'Marine ecotoxicity potential (METP)', 'Metal depletion potential (MDP)', 'Photochemical oxida…	Not mentioned	['Sub-case 4.1: 10.95 kg CO2-eq./kg acetic acid', 'Sub-case 4.2: 10.88 kg CO2-eq./kg acetic acid', 'Sub-case 4.3: 10.92 kg CO2-eq./kg acetic acid', 'Sub-case 4.4: 10.80 kg CO2-eq./kg acetic acid', 'Sub-case 4.5: 10.38 kg CO2-eq./kg acetic acid', 'Sub-case 5.1: 5.22 kg CO2-eq./kg acetic acid', 'Sub-case 5.2: 5.12 kg CO2-eq./kg acetic acid', 'Sub-case 5.3: 5.12 kg CO2-eq./kg acetic acid', 'Sub-case…
[49]	Chemical	Microbial electrosynthesis: is it sustainable for bioproduction of acetic acid?	Gadkari et al.	2021	10.1039/D1RA00920F	Not provided	/	/	/	/	/	Cradle-to-gate	1000 t of acetic acid	1000	t	acetic acid	Acetic acid	IPCC 2013 GWP 100a	['Global warming potential (GWP)', 'Non-renewable energy use (NREU)']	UK	['Scenario 1 (continuous mode) MES with 3D-GFCF: 11.80 kg CO2-eq. per kg AA', 'Scenario 2 (continuous mode) MES with 3D-GFCF: 1.31 kg CO2-eq. per kg AA', 'Scenario 3 (fed-batch mode) MES with 3D-GFCF: 12.30 kg CO2-eq. per kg AA', 'Scenario 4 (fed-batch mode) MES with 3D-GFCF: 1.81 kg CO2-eq. per kg AA', 'Fossil-based system Celanese process: 1.31 kg CO2-eq. per kg AA']
[50]	Chemical	Environmental Burdens of China's Propylene manufacturing: Comparative life-cycle assessment and scenario analysis	Lv et al.	2021	https://doi.org/10.1016/j.scitotenv.2021.149451	Table s1.	7	Propane dehydrogenation (PDH) pathway	Yes.	Extract the entire table.	Propylene production	Cradle-to-gate	1 t of propylene	1	t	propylene	Propylene	Midpoint method	['Global warming potential (GWP)', 'Primary energy demand (PED)', 'Abiotic depletion potential (ADP)', 'Resource depletion-water (WU)', 'Acidification (AP)', 'Eutrophication potential (EP)', 'Respiratory inorganics (RI)', 'Ozone depletion (ODP)', 'Photochemical ozone formation (POFP)']	China	['CTO: 10,082 kg-CO2 eq/t', 'SC: 1830 kg-CO2 eq/t', 'CC: 964 kg-CO2 eq/t']
[50]	Chemical	Environmental Burdens of China's Propylene manufacturing: Comparative life-cycle assessment and scenario analysis	Lv et al.	2021	https://doi.org/10.1016/j.scitotenv.2021.149451	Table s2.	8, 9	Coal to olefin (CTO) pathway	Yes.	Extract the entire table.	Propylene production	Cradle-to-gate	1 t of propylene	1	t	propylene	Propylene	Midpoint method	['Global warming potential (GWP)', 'Primary energy demand (PED)', 'Abiotic depletion potential (ADP)', 'Resource depletion-water (WU)', 'Acidification (AP)', 'Eutrophication potential (EP)', 'Respiratory inorganics (RI)', 'Ozone depletion (ODP)', 'Photochemical ozone formation (POFP)']	China	['CTO: 10,082 kg-CO2 eq/t', 'SC: 1830 kg-CO2 eq/t', 'CC: 964 kg-CO2 eq/t']
[50]	Chemical	Environmental Burdens of China's Propylene manufacturing: Comparative life-cycle assessment and scenario analysis	Lv et al.	2021	https://doi.org/10.1016/j.scitotenv.2021.149451	Table S3.	10	Steam cracking (SC) pathway	Yes.	Extract the entire table.	Propylene production	Cradle-to-gate	1 t of propylene	1	t	propylene	Propylene	Midpoint method	['Global warming potential (GWP)', 'Primary energy demand (PED)', 'Abiotic depletion potential (ADP)', 'Resource depletion-water (WU)', 'Acidification (AP)', 'Eutrophication potential (EP)', 'Respiratory inorganics (RI)', 'Ozone depletion (ODP)', 'Photochemical ozone formation (POFP)']	China	['CTO: 10,082 kg-CO2 eq/t', 'SC: 1830 kg-CO2 eq/t', 'CC: 964 kg-CO2 eq/t']
[50]	Chemical	Environmental Burdens of China's Propylene manufacturing: Comparative life-cycle assessment and scenario analysis	Lv et al.	2021	https://doi.org/10.1016/j.scitotenv.2021.149451	Table S4.	11	catalytic cracking (CC) pathway	Yes.	Extract the entire table.	Propylene production	Cradle-to-gate	1 t of propylene	1	t	propylene	Propylene	Midpoint method	['Global warming potential (GWP)', 'Primary energy demand (PED)', 'Abiotic depletion potential (ADP)', 'Resource depletion-water (WU)', 'Acidification (AP)', 'Eutrophication potential (EP)', 'Respiratory inorganics (RI)', 'Ozone depletion (ODP)', 'Photochemical ozone formation (POFP)']	China	['CTO: 10,082 kg-CO2 eq/t', 'SC: 1830 kg-CO2 eq/t', 'CC: 964 kg-CO2 eq/t']
[51]	Chemical	Life cycle assessment of primary energy demand and greenhouse gas (GHG) emissions of four propylene production pathways in China	Zhao et al.	2017	https://doi.org/10.1016/j.jclepro.2015.12.099	Table 4.	5	Methanol-to-olefins (MTO) pathway	Yes.	Extract the entire table.	Propylene production	Cradle-to-gate	1 t of propylene	1	t	propylene	Propylene	IPCC 2007	['Global warming potential (GWP)']	China	['Catalytic cracking (CC): 1.60 t CO2-eq/t propylene', 'Stream cracking (SC): 2.06 t CO2-eq/t propylene', 'Coal-to-olefins (CTO): 12.16 t CO2-eq/t propylene', 'Coal-to-propylene (CTP): 9.23 t CO2-eq/t propylene']
[51]	Chemical	Life cycle assessment of primary energy demand and greenhouse gas (GHG) emissions of four propylene production pathways in China	Zhao et al.	2017	https://doi.org/10.1016/j.jclepro.2015.12.099	Table 4.	5	Methanol-topropylene (MTP) pathway	Yes.	Extract the entire table.	Propylene production	Cradle-to-gate	1 t of propylene	1	t	propylene	Propylene	IPCC 2007	['Global warming potential (GWP)']	China	['Catalytic cracking (CC): 1.60 t CO2-eq/t propylene', 'Stream cracking (SC): 2.06 t CO2-eq/t propylene', 'Coal-to-olefins (CTO): 12.16 t CO2-eq/t propylene', 'Coal-to-propylene (CTP): 9.23 t CO2-eq/t propylene']
[52]	Chemical	What is the best green propylene production pathway?: technical, economic, and environmental assessment	Kim et al.	2021	https://doi.org/10.1039/D1GC01791H	Not provided	/	/	/	/	/	Gate-to-gate	1 t of propylene	1	t	propylene	Propylene	Not mentioned	['Global warming potential (GWP)', 'Cumulated energy demand', 'Acidification potential', 'Eutrophication potential', 'Ozone depletion potential', 'Particulate matter formation']	Not mentioned	['MTP via indirect MeOH synthesis: 923.73 kg-CO2 eq. per ton-propylene', 'MTP via direct MeOH synthesis: 427.58 kg-CO2 eq. per ton-propylene', 'MTP from natural gas: 16.4 kg-CO2 eq. per kg-propylene', 'MTP from coal: 4.3 kg-CO2 eq. per kg-propylene', 'Propane dehydrogenation: 2.2 kg-CO2 eq. per kg-propylene', 'Naphtha cracking: 1.6 kg-CO2 eq. per kg-propylene']
[53]	Chemical	Exergy-aided environmental life cycle assessment of propylene oxide production	Ghannadzadeh & Tarighaleslami	2022	https://doi.org/10.1007/s11367-021-01969-z	Table 3.	7	Petro-based pathway	Yes.	Extract the entire table.	Propylene oxide production	Cradle-to-gate	1 kg of propylene oxide	1	kg	propylene oxide	Propylene oxide	ReCiPe	['Climate change', 'Ozone depletion', 'Terrestrial acidification', 'Ecotoxicity (freshwater, marine, and terrestrial)', 'Freshwater eutrophication', 'Particulate matter formation', 'Photochemical oxidant formation', 'Human toxicity']	USA	['Base-case scenario: 2.77E-06 DALY (Human health-climate change)']
[54]	Chemical	Environmental sustainability assessment of renewables-based propylene glycol at full industrial scale production	Nachtergaele et al.	2019	https://doi.org/10.1002/jctb.5951	Not provided	/	/	/	/	/	Cradle-to-gate	1 ton of propylene glycol	1	ton	propylene glycol	Propylene glycol	Not mentioned	['Acidification', 'Climate change â€“ IPCC GWP', 'Freshwater ecotoxicity', 'Freshwater eutrophication', 'Human toxicity, cancer effects', 'Human toxicity, noncancer effects', 'Ionizing radiation E (interim)', 'Ionizing radiation HH', 'Marine eutrophication', 'Ozone depletion', 'Particulate matter', 'Photochemical ozone formation', 'Terrestrial eutrophication', 'CEENE abiotic renewable resources',…	Ertvelde, Belgium	['Oleochemical PG: 40% reduction kg CO2-eq.', 'Biodiesel PG: 60% reduction kg CO2-eq.']
[55]	Chemical	High-Value Propylene Glycol from Low-Value Biodiesel Glycerol: A Techno-Economic and Environmental Assessment under Uncertainty	Gonzalez-Garay et al.	2017	https://doi.org/10.1021/acssuschemeng.7b00286	Table S11.	21	Propylene oxide conversion (BAU)	Yes.	Extract the entire table.	Propylene glycol production	Cradle-to-gate	1 kg of propylene glycol	1	kg	propylene glycol	Propylene glycol	CML 2001	['Global warming potential (GWP)', 'Ozone layer depletion', 'Photochemical oxidation', 'Marine aquatic ecotoxicity', 'Fresh aquatic ecotoxicity', 'Terrestrial ecotoxicity', 'Eutrophication potential', 'Human toxicity', 'Acidification potential', 'Depletion of abiotic resources']	United States	['BAU: 4.8 kg CO2-eq/kg', 'GB-1: 4.5 kg CO2-eq/kg', 'GB-2: 1.85 kg CO2-eq/kg']
[55]	Chemical	High-Value Propylene Glycol from Low-Value Biodiesel Glycerol: A Techno-Economic and Environmental Assessment under Uncertainty	Gonzalez-Garay et al.	2017	https://doi.org/10.1021/acssuschemeng.7b00286	Table S11.	21	Hydrogenolysis of glycerol (GB-1)	Yes.	Extract the entire table.	Propylene glycol production	Cradle-to-gate	1 kg of propylene glycol	1	kg	propylene glycol	Propylene glycol	CML 2001	['Global warming potential (GWP)', 'Ozone layer depletion', 'Photochemical oxidation', 'Marine aquatic ecotoxicity', 'Fresh aquatic ecotoxicity', 'Terrestrial ecotoxicity', 'Eutrophication potential', 'Human toxicity', 'Acidification potential', 'Depletion of abiotic resources']	United States	['BAU: 4.8 kg CO2-eq/kg', 'GB-1: 4.5 kg CO2-eq/kg', 'GB-2: 1.85 kg CO2-eq/kg']
[55]	Chemical	High-Value Propylene Glycol from Low-Value Biodiesel Glycerol: A Techno-Economic and Environmental Assessment under Uncertainty	Gonzalez-Garay et al.	2017	https://doi.org/10.1021/acssuschemeng.7b00286	Table S11.	21	Hydrogenolysis of glycerol (GB-2)	Yes.	Extract the entire table.	Propylene glycol production	Cradle-to-gate	1 kg of propylene glycol	1	kg	propylene glycol	Propylene glycol	CML 2001	['Global warming potential (GWP)', 'Ozone layer depletion', 'Photochemical oxidation', 'Marine aquatic ecotoxicity', 'Fresh aquatic ecotoxicity', 'Terrestrial ecotoxicity', 'Eutrophication potential', 'Human toxicity', 'Acidification potential', 'Depletion of abiotic resources']	United States	['BAU: 4.8 kg CO2-eq/kg', 'GB-1: 4.5 kg CO2-eq/kg', 'GB-2: 1.85 kg CO2-eq/kg']
[55]	Chemical	High-Value Propylene Glycol from Low-Value Biodiesel Glycerol: A Techno-Economic and Environmental Assessment under Uncertainty	Gonzalez-Garay et al.	2017	https://doi.org/10.1021/acssuschemeng.7b00286	Table S11.	21	Hydrogenolysis of glycerol (GB-3)	Yes.	Extract the entire table.	Propylene glycol production	Cradle-to-gate	1 kg of propylene glycol	1	kg	propylene glycol	Propylene glycol	CML 2001	['Global warming potential (GWP)', 'Ozone layer depletion', 'Photochemical oxidation', 'Marine aquatic ecotoxicity', 'Fresh aquatic ecotoxicity', 'Terrestrial ecotoxicity', 'Eutrophication potential', 'Human toxicity', 'Acidification potential', 'Depletion of abiotic resources']	United States	['BAU: 4.8 kg CO2-eq/kg', 'GB-1: 4.5 kg CO2-eq/kg', 'GB-2: 1.85 kg CO2-eq/kg']
[56]	Chemical	Life cycle analysis of renewable natural gas and lactic acid production from waste feedstocks	Lee et al.	2021	https://doi.org/10.1016/j.jclepro.2021.127653	Not provided	/	/	/	/	/	Cradle-to-gate	1 kg of lactic acid	1	kg	lactic acid	Lactic acid	GREET model, GWP 100 from IPCC	['Global warming potential (GWP)']	United States	['RNG from sludge: 27 gCO2-e/MJ', 'RNG from food waste: -87 gCO2-e/MJ', 'RNG from swine manure: -146 gCO2-e/MJ', 'RNG from FOG: -68 gCO2-e/MJ', 'LA from sludge: -1.4 kgCO2-e/kg', 'LA from food waste: -4.2 kgCO2-e/kg', 'LA from swine manure: -4.9 kgCO2-e/kg', 'LA from FOG: -2.2 kgCO2-e/kg']
[57]	Chemical	Environmental hotspots of lactic acid production systems	Ögmundarson et al.	2019	https://doi.org/10.1111/gcbb.12652	Not provided	/	/	/	/	/	Cradle-to-grave	1 kg of lactic acid	1	kg	lactic acid	Lactic acid	ReCiPe 2016	['Global warming potential (GWP)', 'Stratospheric ozone depletion', 'Ionizing radiation', 'Ozone formation', 'Human toxicity', 'Fine particulate matter impacts', 'Tropospheric ozone formation', 'Acidification', 'Eutrophication', 'Ecotoxicity', 'Land-use', 'Resources depletion', 'Water consumption']	United States	['Lactic acid from corn: 4.19 kg CO2-eq.', 'Lactic acid from corn stover: 7.90 kg CO2-eq.', 'Lactic acid from Laminaria sp.: 11.0 kg CO2-eq.']
[58]	Chemical	Biological valorization of natural gas for the production of lactic acid: Techno-economic analysis and life cycle assessment	Fei et al.	2020	https://doi.org/10.1016/j.bej.2020.107500	Table 3.	5	Natural gas-to-LA pathway	Yes.	Extract the entire table. Fill lactic acid as an output.		Cradle-to-gate	1 kg of lactic acid	1	kg	lactic acid	Lactic acid	TRACI	['Global warming potential (GWP)', 'Ozone depletion', 'Smog', 'Acidification', 'Eutrophication', 'Carcinogenics', 'Non carcinogenics', 'Respiratory effects', 'Ecotoxicity', 'Fossil fuel depletion']	North Dakota, USA	['Lactic acid: 8.98 kg CO2-eq/kg']
[59]	Chemical	Relay photo/thermal catalysis enables efficient cascade upgrading of sugars to lactic acid: Mechanism study and life cycle assessment	Ding et al.	2023	https://doi.org/10.1016/j.cej.2022.139687	Not provided	/	/	/	/	/	Cradle-to-gate	1 kg of lactic acid	1	kg	lactic acid	Lactic acid	TRACI	['Global warming potential (GWP)', 'Acidification potential', 'Eutrophication potential', 'Fossil fuels resource depletion', 'Ecotoxicity potential']	Not mentioned	['Biobased-LA: 2.97 kg CO2-eq./kg LA', 'Conventional LA: 4.30 kg CO2-eq./kg LA']
[60]	Chemical	Life cycle assessment of fermentative production of lactic acid from bread waste based on process modelling using pinch technology	Vanapalli et al.	2023	https://doi.org/10.1016/j.scitotenv.2023.167051	Table 1.	5	Bread waste fermentation pathway	No. no clear inputs and outputs for LA synthesis.	/	/	Cradle-to-gate	1 kg of lactic acid	1	kg	lactic acid	Lactic acid	ReCiPe 2016	['Global warming potential (GWP)', 'Terrestrial acidification potential (TAP)', 'Freshwater eutrophication potential (FWEP)', 'Marine eutrophication potential (MEP)', 'Carcinogenic human toxicity (HTc)', 'Non-carcinogenic human toxicity (HTnc)', 'Terrestrial ecotoxicity potential (TETP)', 'Freshwater ecotoxicity potential (FWETp)', 'Marine ecotoxicity potential (METp)']	United Kingdom	['Low pH fermentation: 11.4 â€“ 11.5 % reduction in overall environmental footprint']
[61]	Chemical	Techno-economic analysis and environmental impact assessment of lignocellulosic lactic acid production	Daful and Görgens	2017	https://doi.org/10.1016/j.ces.2016.12.054	Table 4.	8	Lignocellulosic LA production (Scenario 1)	Yes.	Extract the entire table.	Lactic acid production	Cradle-to-gate	1 t of lactic acid	1	t	lactic acid	Lactic acid	ReCiPe Midpoint(H)	['Abiotic Depletion Potential (ADP)', 'Acidification Potential (AP)', 'Freshwater Eutrophication Potential (FWEP)', 'Global Warming Potential (GWP)', 'Ozone Layer Depletion Potential (ODP)', 'Human Toxicity Potential (HTP)', 'Fresh Water Aquatic Ecotoxicity Potential (FWAETP)', 'Terrestrial Ecotoxicity Potential (TETP)', 'Photochemical Oxidation Potential (POCP)']	South Africa	['Scenario 1: Not mentioned', 'Scenario 2: Not mentioned', 'Scenario 3: Not mentioned', 'Scenario 4: Not mentioned', 'Scenario 5: Not mentioned', 'Scenario 6: Not mentioned']
[61]	Chemical	Techno-economic analysis and environmental impact assessment of lignocellulosic lactic acid production	Daful and Görgens	2017	https://doi.org/10.1016/j.ces.2016.12.054	Table 4.	8	Lignocellulosic LA production (Scenario 2)	Yes.	Extract the entire table.	Lactic acid production	Cradle-to-gate	1 t of lactic acid	1	t	lactic acid	Lactic acid	ReCiPe Midpoint(H)	['Abiotic Depletion Potential (ADP)', 'Acidification Potential (AP)', 'Freshwater Eutrophication Potential (FWEP)', 'Global Warming Potential (GWP)', 'Ozone Layer Depletion Potential (ODP)', 'Human Toxicity Potential (HTP)', 'Fresh Water Aquatic Ecotoxicity Potential (FWAETP)', 'Terrestrial Ecotoxicity Potential (TETP)', 'Photochemical Oxidation Potential (POCP)']	South Africa	['Scenario 1: Not mentioned', 'Scenario 2: Not mentioned', 'Scenario 3: Not mentioned', 'Scenario 4: Not mentioned', 'Scenario 5: Not mentioned', 'Scenario 6: Not mentioned']
[61]	Chemical	Techno-economic analysis and environmental impact assessment of lignocellulosic lactic acid production	Daful and Görgens	2017	https://doi.org/10.1016/j.ces.2016.12.054	Table 4.	8	Lignocellulosic LA production (Scenario 3)	Yes.	Extract the entire table.	Lactic acid production	Cradle-to-gate	1 t of lactic acid	1	t	lactic acid	Lactic acid	ReCiPe Midpoint(H)	['Abiotic Depletion Potential (ADP)', 'Acidification Potential (AP)', 'Freshwater Eutrophication Potential (FWEP)', 'Global Warming Potential (GWP)', 'Ozone Layer Depletion Potential (ODP)', 'Human Toxicity Potential (HTP)', 'Fresh Water Aquatic Ecotoxicity Potential (FWAETP)', 'Terrestrial Ecotoxicity Potential (TETP)', 'Photochemical Oxidation Potential (POCP)']	South Africa	['Scenario 1: Not mentioned', 'Scenario 2: Not mentioned', 'Scenario 3: Not mentioned', 'Scenario 4: Not mentioned', 'Scenario 5: Not mentioned', 'Scenario 6: Not mentioned']
[61]	Chemical	Techno-economic analysis and environmental impact assessment of lignocellulosic lactic acid production	Daful and Görgens	2017	https://doi.org/10.1016/j.ces.2016.12.054	Table 4.	8	Lignocellulosic LA production (Scenario 4)	Yes.	Extract the entire table.	Lactic acid production	Cradle-to-gate	1 t of lactic acid	1	t	lactic acid	Lactic acid	ReCiPe Midpoint(H)	['Abiotic Depletion Potential (ADP)', 'Acidification Potential (AP)', 'Freshwater Eutrophication Potential (FWEP)', 'Global Warming Potential (GWP)', 'Ozone Layer Depletion Potential (ODP)', 'Human Toxicity Potential (HTP)', 'Fresh Water Aquatic Ecotoxicity Potential (FWAETP)', 'Terrestrial Ecotoxicity Potential (TETP)', 'Photochemical Oxidation Potential (POCP)']	South Africa	['Scenario 1: Not mentioned', 'Scenario 2: Not mentioned', 'Scenario 3: Not mentioned', 'Scenario 4: Not mentioned', 'Scenario 5: Not mentioned', 'Scenario 6: Not mentioned']
[61]	Chemical	Techno-economic analysis and environmental impact assessment of lignocellulosic lactic acid production	Daful and Görgens	2017	https://doi.org/10.1016/j.ces.2016.12.054	Table 4.	8	Lignocellulosic LA production (Scenario 5)	Yes.	Extract the entire table.	Lactic acid production	Cradle-to-gate	1 t of lactic acid	1	t	lactic acid	Lactic acid	ReCiPe Midpoint(H)	['Abiotic Depletion Potential (ADP)', 'Acidification Potential (AP)', 'Freshwater Eutrophication Potential (FWEP)', 'Global Warming Potential (GWP)', 'Ozone Layer Depletion Potential (ODP)', 'Human Toxicity Potential (HTP)', 'Fresh Water Aquatic Ecotoxicity Potential (FWAETP)', 'Terrestrial Ecotoxicity Potential (TETP)', 'Photochemical Oxidation Potential (POCP)']	South Africa	['Scenario 1: Not mentioned', 'Scenario 2: Not mentioned', 'Scenario 3: Not mentioned', 'Scenario 4: Not mentioned', 'Scenario 5: Not mentioned', 'Scenario 6: Not mentioned']
[61]	Chemical	Techno-economic analysis and environmental impact assessment of lignocellulosic lactic acid production	Daful and Görgens	2017	https://doi.org/10.1016/j.ces.2016.12.054	Table 4.	8	Lignocellulosic LA production (Scenario 6)	Yes.	Extract the entire table.	Lactic acid production	Cradle-to-gate	1 t of lactic acid	1	t	lactic acid	Lactic acid	ReCiPe Midpoint(H)	['Abiotic Depletion Potential (ADP)', 'Acidification Potential (AP)', 'Freshwater Eutrophication Potential (FWEP)', 'Global Warming Potential (GWP)', 'Ozone Layer Depletion Potential (ODP)', 'Human Toxicity Potential (HTP)', 'Fresh Water Aquatic Ecotoxicity Potential (FWAETP)', 'Terrestrial Ecotoxicity Potential (TETP)', 'Photochemical Oxidation Potential (POCP)']	South Africa	['Scenario 1: Not mentioned', 'Scenario 2: Not mentioned', 'Scenario 3: Not mentioned', 'Scenario 4: Not mentioned', 'Scenario 5: Not mentioned', 'Scenario 6: Not mentioned']
[62]	Chemical	Environmental impact assessment of lignocellulosic lactic acid production: Integrated with existing sugar mills	Daful et al.	2016	https://doi.org/10.1016/j.fbp.2016.04.005	Table 4	7	Lignocellulosic biomass (SCBL) -to-LA pathway	Yes.	Extract the entire table.	Lactic acid production	Cradle-to-gate	1 t of lactic acid	1	t	lactic acid	Lactic acid	ReCiPe Midpoint(H)	['Abiotic depletion potential', 'Acidification potential', 'Freshwater eutrophication potential', 'Marine eutrophication potential', 'Global warming potential (GWP)', 'Ozone layer depletion potential', 'Human toxicity potential', 'Freshwater aquatic ecotoxicity potential', 'Marine aquatic ecotoxicity potential', 'Terrestrial ecotoxicity potential', 'Photochemical oxidant creation potential', 'Met…	South Africa	['Biobased LA: 412.50 kg CO2-eq./tonne', 'Fossil based LA: 4338.14 kg CO2-eq./tonne']
[63]	Chemical	Life cycle and economic assessment of sugarcane bagasse valorization to lactic acid	Munagala et al.	2021	https://doi.org/10.1016/j.wasman.2021.02.052	Table B1	11	Sugarcane bagasse-based pathway	Yes.	The inventory table includes size reduction, pretreatment, washing of pretreated solid, hydrolysis, fermentation, and acidification and filtration. Only include the last step, which yields the lactic acid.	Lactic acid production	Cradle-to-gate	1 kg of lactic acid	1	kg	lactic acid	Lactic acid	ReCiPe 2016	['Climate change', 'Water depletion', 'Agricultural land occupation', 'Freshwater eutrophication', 'Ozone depletion', 'Particulate matter formation', 'Terrestrial acidification', 'Fossil depletion']	India	['Base case: 4.62 kg CO2-eq./kg', 'Scenario-4: 5.54 kg CO2-eq./kg', 'Optimistic scenario: 2.29 kg CO2-eq./kg']
[64]	Chemical	To what extent do geopolitical conditions affect the environmental sustainability of the circular economy? A comparative LCA study of lactic acid production in Denmark and Iran	Marami et al.	2024	https://doi.org/10.1016/j.spc.2024.04.006	Table 3.	7	Biorefining biowaste to LA pathway	No. no clear inputs and outputs for LA synthesis.	/	/	Not mentioned	1 t of lactic acid	1	t	lactic acid	Lactic acid	ReCiPe 2016 v1.1 hierarchical version	['Global warming potential (GWP)', 'Stratospheric ozone depletion', 'Ionizing radiation', 'Ozone formation, Human health', 'Fine particulate matter formation', 'Ozone formation, Terrestrial ecosystems', 'Terrestrial acidification', 'Freshwater eutrophication', 'Marine eutrophication', 'Terrestrial ecotoxicity', 'Freshwater ecotoxicity', 'Marine ecotoxicity', 'Human carcinogenic toxicity', 'Human …	Denmark and Iran	['Sc1-DK: 4186 kg CO2-eq/t LA', 'Sc2-DK: 3091 kg CO2-eq/t LA', 'Sc3-DK: 3997 kg CO2-eq/t LA', 'Sc1-IR: -12614 kg CO2-eq/t LA', 'Sc2-IR: -9273 kg CO2-eq/t LA', 'Sc3-IR: -15953 kg CO2-eq/t LA']
[65]	Chemical	Valorization of sugarcane bagasse to lactic acid: Life cycle assessment and Techno-economic evaluation in Indian scenario	Meghana et al.	2021	https://doi.org/10.1016/B978-0-323-88506-5.50304-1	Not provided	/	/	/	/	/	Cradle-to-gate	1 kg of lactic acid	1	kg	lactic acid	Lactic acid	ReCiPe Midpoint (H)	['Global warming potential (GWP)', 'Water depletion', 'Agricultural land occupation']	India	['Bagasse-based LA process: 4.62 kg CO2-eq./kg']
[66]	Chemical	Sustainable Lactic Acid Production from Lignocellulosic Biomass	Li et al.	2021	https://doi.org/10.1021/acssuschemeng.0c08055	Not provided	/	/	/	/	/	Cradle-to-gate	1 kg of lactic acid	1	kg	lactic acid	Lactic acid	Not mentioned	['Global warming potential (GWP 100)', 'Fossil energy consumption (FEC)']	United States	['Baseline: 5.92 kg CO2-eq/kg', 'With 25% renewable natural gas and 25% biomass diversion: 2.79 kg CO2-eq/kg', 'Low-pH fermentation scenario: 3.08 - 5.55 kg CO2-eq/kg']
[67]	Chemical	Environmental and economic assessment of lactic acid production from glycerol using cascade bio- and chemocatalysis	Morales et al.	2015	https://doi.org/10.1039/C4EE03352C	Table 3.	6	Chemocatalytic production of LA from DHA (in water)	Yes.	Extract the entire table. Fill lactic acid as an output.	Lactic acid production	Cradle-to-gate	1 kg of lactic acid	1	kg	lactic acid	Lactic acid	Not mentioned	['Global warming potential (GWP-100a)', 'Cumulative energy demand (CED)', 'Eco-indicator 99 (EI99)']	Not mentioned	Not mentioned
[67]	Chemical	Environmental and economic assessment of lactic acid production from glycerol using cascade bio- and chemocatalysis	Morales et al.	2015	https://doi.org/10.1039/C4EE03352C	Table 4.	7	Chemocatalytic production of LA from DHA (in methanol)	Yes.	Extract the entire table. Fill lactic acid as an output.	Lactic acid production	Cradle-to-gate	1 kg of lactic acid	1	kg	lactic acid	Lactic acid	Not mentioned	['Global warming potential (GWP-100a)', 'Cumulative energy demand (CED)', 'Eco-indicator 99 (EI99)']	Not mentioned	Not mentioned
[68]	Chemical	Sustainable Production of Acrylic Acid via 3-Hydroxypropionic Acid from Lignocellulosic Biomass	Bhagwat et al.	2021	https://doi.org/10.1021/acssuschemeng.1c05441	Not provided	/	/	/	/	/	Cradle-to-grave	1 kg of acrylic acid	1	kg	acrylic acid	Acrylic acid	Not mentioned	['Global warming potential (GWP 100)', 'Fossil energy consumption (FEC)']	Not mentioned	['Baseline scenario: 3.90 kg CO2-eq/kg', 'Improved scenario: 3.00 kg CO2-eq/kg', 'Low-pH fermentation scenario: 2.30 kg CO2-eq/kg']
[69]	Chemical	Life Cycle Analysis applied to acrylic acid production process with different fuels for steam generation	Petrescu et al.	2016	https://doi.org/10.1016/j.jclepro.2016.05.088	Table 5 & Table 6.	7	Acrylic acid production process from propylene (case 1)	Yes. only record case 1 from total 10 cases.	The inventory table includes the steam production process, acrylic acid production process, MDEA production, and transportation. Only include the acrylic acid production process.	Acrylic acid production	Cradle-to-grave	1 t of acrylic acid	1	t	acrylic acid	Acrylic acid	CML 2001	['Global warming potential (GWP)', 'Acidification potential (AP)', 'Eutrophication potential (EP)', 'Ozone depletion potential (ODP)', 'Abiotic depletion potential (ADP)', 'Human toxicity potential (HTP)', 'Photochemical ozone creation potential (PCOP)', 'Terrestrial ecotoxicity potential (TETP)', 'Marine aquatic ecotoxicity potential (MAETP)', 'Freshwater aquatic ecotoxicity potential (FAETP)']	Not mentioned	['Case 1: 3877.00 kg CO2-eq./tonne', 'Case 2: 5525.0 kg CO2-eq./tonne', 'Case 3: 5528.65 kg CO2-eq./tonne', 'Case 4: 4756.04 kg CO2-eq./tonne', 'Case 5: 4648.08 kg CO2-eq./tonne', 'Case 6: 1094.5 kg CO2-eq./tonne', 'Case 7: 1790.43 kg CO2-eq./tonne', 'Case 8: 2486.05 kg CO2-eq./tonne', 'Case 9: 3181.67 kg CO2-eq./tonne', 'Case 10: 1673.45 kg CO2-eq./tonne']
[70]	Chemical	Glycerol as feedstock in the synthesis of chemicals: a life cycle analysis for acrolein production	Cespi et al.	2015	https://doi.org/10.1039/C4GC01497A	Table S3.	3	Glycerol dehydration to acrolein	No. Not mention the reference flow.	/	/	Cradle-to-gate	1 kg of acrolein	1	kg	acrolein	Acrolein	ReCiPe 2008 and IPCC 2007	['Climate change', 'Fossil fuel depletion', 'Metal depletion', 'Agricultural land occupation', 'Terrestrial ecotoxicity']	Italy	['Scenario A: 45.2 kg CO2-eq.', 'Scenario B: 49.7 kg CO2-eq.']
[70]	Chemical	Glycerol as feedstock in the synthesis of chemicals: a life cycle analysis for acrolein production	Cespi et al.	2015	https://doi.org/10.1039/C4GC01497A	Table S4.	4	Propylene oxidation to acrolein	No. Not mention the reference flow.	/	/	Cradle-to-gate	1 kg of acrolein	1	kg	acrolein	Acrolein	ReCiPe 2008 and IPCC 2007	['Climate change', 'Fossil fuel depletion', 'Metal depletion', 'Agricultural land occupation', 'Terrestrial ecotoxicity']	Italy	['Scenario A: 45.2 kg CO2-eq.', 'Scenario B: 49.7 kg CO2-eq.']
[71]	Chemical	Environmental Feasibility Analysis for the Acrylonitrile Production from Glycerol	Neto et al.	2023	https://doi.org/10.1002/ceat.202300052	Table 3.	4	Glycerol-to-Acrylonitrile pathway	Yes.	Extract the entire table.	Acrylonitrile production	Gate-to-gate	1 kg of acrylonitrile	1	kg	acrylonitrile	Acrylonitrile	IPCC 2010	['Global warming potential (GWP)', 'Oil consumption', 'Water consumption']	Mato Grosso, Brazil	['Route 1-MT SB: 2.23 kg CO2-eq', 'Route 2-MT SB: 2.24 kg CO2-eq', 'Route 3-WCO: 2.23 kg CO2-eq', 'Route 4-Res: 1.96 kg CO2-eq']
[72]	Chemical	Assessing energy performance of bio-based succinic acid production using LCA	Moussa et al.	2016	https://doi.org/10.1016/j.jclepro.2016.08.104	Table 2.	4	Bio-SAC production	Yes.	Extract the entire table. Fill succinic acid as an output.	Succinic acid production	Cradle-to-gate	1 kg of succinic acid	1	kg	succinic acid	Succinic acid	IPCC (GWP 100a) 2007	['Global warming potential (GWP)', 'Non-renewable fossil cumulative energy demand (non-ren CED)', 'Waste heat']	Louisiana, USA	['Bio-SAC: 0.87 kg CO2-eq/kg']
[73]	Chemical	Greenhouse gas emissions and non-renewable energy use profiles of bio-based succinic acid from Arundo donax L. lignocellulosic feedstock	Zucaro et al.	2017	https://doi.org/10.1007/s10098-017-1401-6	Table 2.	5	Giant reed bio-based SA (GR bio-SA)	Yes.	Extract the entire table.	Succinic acid production	Cradle-to-gate	1 kg of succinic acid	1	kg	succinic acid	Succinic acid	IPCC v1.02 (GWP 100a)	['Global warming potential (GWP)', 'Non-renewable energy use (NREU)']	Campania Region, Southern Italy	['GR bio-SA: 3.9 kg CO2-eq/kg', 'Net GWP: 2 kg CO2-eq/kg']
[74]	Chemical	Life Cycle Analysis of Succinic Acid Production in the Brazilian Biorefinery Context	Silva et al.	2024	https://doi.org/10.3390/su16031234	Table S1.	1	SA production from sugarcane	Yes.	Extract the entire table.	Succinic acid production	Cradle-to-gate	1 kg of succinic acid	1	kg	succinic acid	Succinic acid	ReCiPe	['Acidification potential (AP)', 'Eutrophication potential (EP)', 'Global warming potential (GWP)', 'Ozone depletion potential (ODP)', 'Photochemical oxidation potential (POP)', 'Human toxicity potential (HTP)', 'Aquatic ecotoxicity potential (AEP)', 'Terrestrial ecotoxicity (TEP)', 'Metal depletion (MD)', 'Fossil depletion (FD)']	Brazil	['1st Scenario: 1.95 Ã— 10 kg CO2-eq', '2nd Scenario: 19.4 Ã— 10 kg CO2-eq', '3rd Scenario: 13.4 Ã— 10 kg CO2-eq', '4th Scenario: 45.3 Ã— 10 kg CO2-eq']
[74]	Chemical	Life Cycle Analysis of Succinic Acid Production in the Brazilian Biorefinery Context	Silva et al.	2024	https://doi.org/10.3390/su16031234	Table S4.	3	SA production from sorghum	Yes.	Extract the entire table.	Succinic acid production	Cradle-to-gate	1 kg of succinic acid	1	kg	succinic acid	Succinic acid	ReCiPe	['Acidification potential (AP)', 'Eutrophication potential (EP)', 'Global warming potential (GWP)', 'Ozone depletion potential (ODP)', 'Photochemical oxidation potential (POP)', 'Human toxicity potential (HTP)', 'Aquatic ecotoxicity potential (AEP)', 'Terrestrial ecotoxicity (TEP)', 'Metal depletion (MD)', 'Fossil depletion (FD)']	Brazil	['1st Scenario: 1.95 Ã— 10 kg CO2-eq', '2nd Scenario: 19.4 Ã— 10 kg CO2-eq', '3rd Scenario: 13.4 Ã— 10 kg CO2-eq', '4th Scenario: 45.3 Ã— 10 kg CO2-eq']
[74]	Chemical	Life Cycle Analysis of Succinic Acid Production in the Brazilian Biorefinery Context	Silva et al.	2024	https://doi.org/10.3390/su16031234	Table S6.	5	SA production from apple pomace	Yes.	Extract the entire table.	Succinic acid production	Cradle-to-gate	1 kg of succinic acid	1	kg	succinic acid	Succinic acid	ReCiPe	['Acidification potential (AP)', 'Eutrophication potential (EP)', 'Global warming potential (GWP)', 'Ozone depletion potential (ODP)', 'Photochemical oxidation potential (POP)', 'Human toxicity potential (HTP)', 'Aquatic ecotoxicity potential (AEP)', 'Terrestrial ecotoxicity (TEP)', 'Metal depletion (MD)', 'Fossil depletion (FD)']	Brazil	['1st Scenario: 1.95 Ã— 10 kg CO2-eq', '2nd Scenario: 19.4 Ã— 10 kg CO2-eq', '3rd Scenario: 13.4 Ã— 10 kg CO2-eq', '4th Scenario: 45.3 Ã— 10 kg CO2-eq']
[74]	Chemical	Life Cycle Analysis of Succinic Acid Production in the Brazilian Biorefinery Context	Silva et al.	2024	https://doi.org/10.3390/su16031234	Table S7.	6	SA production from maleic anhydride	Yes.	Extract the entire table.	Succinic acid production	Cradle-to-gate	1 kg of succinic acid	1	kg	succinic acid	Succinic acid	ReCiPe	['Acidification potential (AP)', 'Eutrophication potential (EP)', 'Global warming potential (GWP)', 'Ozone depletion potential (ODP)', 'Photochemical oxidation potential (POP)', 'Human toxicity potential (HTP)', 'Aquatic ecotoxicity potential (AEP)', 'Terrestrial ecotoxicity (TEP)', 'Metal depletion (MD)', 'Fossil depletion (FD)']	Brazil	['1st Scenario: 1.95 Ã— 10 kg CO2-eq', '2nd Scenario: 19.4 Ã— 10 kg CO2-eq', '3rd Scenario: 13.4 Ã— 10 kg CO2-eq', '4th Scenario: 45.3 Ã— 10 kg CO2-eq']
[75]	Chemical	Life cycle analysis of fermentative production of succinic acid from bread waste	Gadkari et al.	2021	https://doi.org/10.1016/j.wasman.2021.04.013	Table 1.	5	Bread waste-based pathway	Yes.	Extract the entire table.	Succinic acid production	Cradle-to-gate	1 kg of succinic acid	1	kg	succinic acid	Succinic acid	IPCC 2013 GWP 100a	['Global warming potential (GWP)', 'Non-renewable energy use (NREU)']	UK	['SA production by bread waste fermentation: 1.3 kg CO2-eq/kg SA', 'SA production by dextrose: 0.88 kg CO2-eq/kg SA', 'SA production by sorghum grains: 0.87 kg CO2-eq/kg SA', 'Fossil-based SA production: 1.94 kg CO2-eq/kg SA']
[76]	Chemical	Eco-design of microbial electrochemical technologies for the production of waste-based succinic acid thanks to a life cycle assessment	Foulet et al.	2019	https://doi.org/10.1016/j.jclepro.2019.03.231	Table 1.	6	Microbial electrochemical pathway	No. no clear inputs and outputs for SA synthesis.	/	/	Not mentioned	1000 t of succinic acid	1000	t	succinic acid	Succinic acid	CML-IA January 2016	['Abiotic depletion', 'Acidification', 'Eutrophication', 'Global warming potential (GWP)', 'Ozone depletion', 'Photochemical ozone creation', 'Human toxicity', 'Ecotoxicity (freshwater, marine, terrestrial)']	France	Not mentioned
[77]	Chemical	Techno-economic and environmental sustainability assessment of succinic acid production from municipal biowaste using an electrochemical membrane bioreactor	Ioannidou et al.	2023	https://doi.org/10.1016/j.cej.2023.145070	Table 4.	5	Electrochemical membrane bioreactor (EMB)-based pathway	Yes.	Extract the entire table.	Succinic acid production	Cradle-to-gate	1 kg of succinic acid	1	kg	succinic acid	Succinic acid	CML2001 (Jan. 2016)	['Global Warming Potential (GWP 100 years)', 'Abiotic Depletion (ADP fossil)', 'Acidification Potential (AP)', 'Eutrophication Potential (EP)', 'Human Toxicity Potential (HTP)']	Not mentioned	['Case 1: 0.81 kg CO2-eq/kg SA', 'Case 2: 1.39 kg CO2-eq/kg SA']
[78]	Chemical	Economic and Environmental Assessment of Succinic Acid Production from Sugarcane Bagasse	Shaji et al.	2021	https://doi.org/10.1021/acssuschemeng.1c02483	Table S1.	2	Sugarcane bagasse-based pathway	No. Complex table	/	/	Cradle-to-gate	1 kg of succinic acid	1	kg	succinic acid	Succinic acid	ReCiPe (H) midpoint method	['Climate change', 'Fossil depletion', 'Freshwater ecotoxicity', 'Freshwater eutrophication', 'Human toxicity', 'Particulate matter formation', 'Photochemical oxidant formation', 'Water depletion']	India	['Succinic acid: 1.39 kg CO2-eq/kg', 'Electricity grid mix in India: 4.30 kg CO2-eq/kg']
[79]	Chemical	Life cycle assessment of butanol production	Brito and Martins.	2017	https://doi.org/10.1016/j.fuel.2017.07.050	Fig 4.	4	ABE process with wheat straw	No. The figure cannot be extracted.	/	/	Not mentioned	1 kg of butanol	1	kg	butanol	Butanol	IMPACT 2002+	['Human health', 'Ecosystem quality', 'Climate change', 'Resources']	Not mentioned	Not mentioned
[80]	Chemical	Life cycle assessment of butanol production in sugarcane biorefineries in Brazil	Pereira et al.	2015	https://doi.org/10.1016/j.jclepro.2014.01.059	Not provided	/	/	/	/	/	Cradle-to-gate	1 kg of butanol	1	kg	butanol	Butanol	CML 2 Baseline 2000 v2.05	['Abiotic depletion (ADP)', 'Acidification (AP)', 'Eutrophication (EP)', 'Global warming potential (GWP)', 'Ozone layer depletion (ODP)', 'Human toxicity (HTP)', 'Photochemical oxidation (POP)']	SÃ£o Paulo, Brazil	['Scenario 1G2GRS: 1.65 kg CO2-eq/kg', 'Scenario 1G2GMS: 1.03 kg CO2-eq/kg']
[81]	Chemical	Catalytic Biorefining of Ethanol from Wine Waste to Butanol and Higher Alcohols: Modeling the Life Cycle Assessment and Process Design	Mazzoni et al.	2018	https://doi.org/10.1021/acssuschemeng.8b02959	Table 9	11	EtOH-based pathway (reaction with NaOH)	Yes.	Extract the entire table.	n-butanol production	Cradle-to-gate	1 kg of butanol	1	kg	butanol	Butanol	IMPACT 2002+	['Carcinogens', 'Noncarcinogens', 'Respiratory inorganics', 'Ionizing radiation', 'Ozone layer depletion', 'Respiratory organics', 'Aquatic ecotoxicity', 'Terrestrial ecotoxicity', 'Terrestrial acid/nutri', 'Land occupation', 'Aquatic acidification', 'Aquatic eutrophication', 'Global warming potential (GWP)', 'Nonrenewable energy', 'Mineral extraction']	Not mentioned	['Biobased butanol from EtOH, with NaOH: 9 kg CO2-eq', 'Biobased butanol from EtOH, with NaOEt: 6 kg CO2-eq', 'Biobased butanol from EtOH, with NaOH (industrial scale up): 7 kg CO2-eq', 'Biobased butanol from EtOH, with NaOEt (industrial scale up): 5 kg CO2-eq']
[81]	Chemical	Catalytic Biorefining of Ethanol from Wine Waste to Butanol and Higher Alcohols: Modeling the Life Cycle Assessment and Process Design	Mazzoni et al.	2018	https://doi.org/10.1021/acssuschemeng.8b02959	Table 10.	11	EtOH-based pathway (reaction with NaOEt)	Yes.	Extract the entire table.	n-butanol production	Cradle-to-gate	1 kg of butanol	1	kg	butanol	Butanol	IMPACT 2002+	['Carcinogens', 'Noncarcinogens', 'Respiratory inorganics', 'Ionizing radiation', 'Ozone layer depletion', 'Respiratory organics', 'Aquatic ecotoxicity', 'Terrestrial ecotoxicity', 'Terrestrial acid/nutri', 'Land occupation', 'Aquatic acidification', 'Aquatic eutrophication', 'Global warming potential (GWP)', 'Nonrenewable energy', 'Mineral extraction']	Not mentioned	['Biobased butanol from EtOH, with NaOH: 9 kg CO2-eq', 'Biobased butanol from EtOH, with NaOEt: 6 kg CO2-eq', 'Biobased butanol from EtOH, with NaOH (industrial scale up): 7 kg CO2-eq', 'Biobased butanol from EtOH, with NaOEt (industrial scale up): 5 kg CO2-eq']
[82]	Chemical	Economic and environmental assessment of n-butanol production in an integrated first and second generation sugarcane biorefinery: Fermentative versus catalytic routes	Pereir et al.	2015	https://doi.org/10.1016/j.apenergy.2015.09.063	Table 7.	6	Sugarcane-based pathway	No. only inputs.	/	/	Not mentioned	1 kg of butanol	1	kg	butanol	Butanol	ReCiPe Midpoint (H) v1.05	['Climate change', 'Ozone depletion', 'Acidification', 'Photochemical oxidation', 'Particulate formation', 'Fossil depletion']	Brazil	['Scenario ALCD: 0.25 kg CO2-eq/kWh', 'Scenario ALCT: 0.25 kg CO2-eq/kWh', 'Scenario ABEW: 0.25 kg CO2-eq/kWh', 'Scenario ABEM: 0.25 kg CO2-eq/kWh']
[83]	Chemical	Techno-economic and Life-Cycle Assessment of One-Step Production of 1,3-Butadiene from Bioethanol Using Reaction Data under Industrial Operating Conditions	Camacho et al.	2020	https://doi.org/10.1021/acssuschemeng.0c02678	Table S7.	7	Bioethanol-to-1,3-BD pathway (scenario B1)	Yes.	Extract the entire table. Input 1,3-Butadiene as an output flow.	1,3-Butadiene production	Cradle-to-gate	1 t of 1,3-Butadiene	1	t	1,3-Butadiene	1,3-Butadiene	ReCiPe2016 midpoint (H) V1.02	['Global warming potential (GWP100)', 'Water consumption (WC)', 'Cumulative energy demand (CED)']	United States, Brazil, Europe	['B1BR: -73 kg CO2-eq/tonne 1,3-BD', 'B2BR: -52 kg CO2-eq/tonne 1,3-BD']
[83]	Chemical	Techno-economic and Life-Cycle Assessment of One-Step Production of 1,3-Butadiene from Bioethanol Using Reaction Data under Industrial Operating Conditions	Camacho et al.	2020	https://doi.org/10.1021/acssuschemeng.0c02678	Table S7.	7	Bioethanol-to-1,3-BD pathway (scenario B2)	Yes.	Extract the entire table. Input 1,3-Butadiene as an output flow.	1,3-Butadiene production	Cradle-to-gate	1 t of 1,3-Butadiene	1	t	1,3-Butadiene	1,3-Butadiene	ReCiPe2016 midpoint (H) V1.02	['Global warming potential (GWP100)', 'Water consumption (WC)', 'Cumulative energy demand (CED)']	United States, Brazil, Europe	['B1BR: -73 kg CO2-eq/tonne 1,3-BD', 'B2BR: -52 kg CO2-eq/tonne 1,3-BD']
[84]	Chemical	Assessing the economic and environmental sustainability of bio-olefins: The case of 1,3-butadiene production from bioethanol	Camacho et al.	2022	https://doi.org/10.1016/j.jclepro.2022.133963	Table 3.	6	One-step bioethanol conversion pathway (scenario B1)	Yes.	Extract the entire table.	1,3-Butadiene production	Cradle-to-gate	1 t of 1,3-Butadiene	1	t	1,3-Butadiene	1,3-Butadiene	ReCiPe 2016	['Global warming potential (GWP)', 'Water consumption (WC)', 'Cumulative energy demand (CED)']	Brazil	['B1: -0.07 kg CO2-eq/kg BD', 'B2: -0.05 kg CO2-eq/kg BD', 'B3: 1.29 kg CO2-eq/kg BD', 'B4: 2.31 kg CO2-eq/kg BD']
[84]	Chemical	Assessing the economic and environmental sustainability of bio-olefins: The case of 1,3-butadiene production from bioethanol	Camacho et al.	2022	https://doi.org/10.1016/j.jclepro.2022.133963	Table 3.	6	One-step bioethanol conversion pathway (scenario B2)	Yes.	Extract the entire table.	1,3-Butadiene production	Cradle-to-gate	1 t of 1,3-Butadiene	1	t	1,3-Butadiene	1,3-Butadiene	ReCiPe 2016	['Global warming potential (GWP)', 'Water consumption (WC)', 'Cumulative energy demand (CED)']	Brazil	['B1: -0.07 kg CO2-eq/kg BD', 'B2: -0.05 kg CO2-eq/kg BD', 'B3: 1.29 kg CO2-eq/kg BD', 'B4: 2.31 kg CO2-eq/kg BD']
[84]	Chemical	Assessing the economic and environmental sustainability of bio-olefins: The case of 1,3-butadiene production from bioethanol	Camacho et al.	2022	https://doi.org/10.1016/j.jclepro.2022.133963	Table 3.	6	Two-step bioethanol conversion pathway (scenario B3)	Yes.	Extract the entire table.	1,3-Butadiene production	Cradle-to-gate	1 t of 1,3-Butadiene	1	t	1,3-Butadiene	1,3-Butadiene	ReCiPe 2016	['Global warming potential (GWP)', 'Water consumption (WC)', 'Cumulative energy demand (CED)']	Brazil	['B1: -0.07 kg CO2-eq/kg BD', 'B2: -0.05 kg CO2-eq/kg BD', 'B3: 1.29 kg CO2-eq/kg BD', 'B4: 2.31 kg CO2-eq/kg BD']
[84]	Chemical	Assessing the economic and environmental sustainability of bio-olefins: The case of 1,3-butadiene production from bioethanol	Camacho et al.	2022	https://doi.org/10.1016/j.jclepro.2022.133963	Table 3.	6	Two-step bioethanol conversion pathway (scenario B4)	Yes.	Extract the entire table.	1,3-Butadiene production	Cradle-to-gate	1 t of 1,3-Butadiene	1	t	1,3-Butadiene	1,3-Butadiene	ReCiPe 2016	['Global warming potential (GWP)', 'Water consumption (WC)', 'Cumulative energy demand (CED)']	Brazil	['B1: -0.07 kg CO2-eq/kg BD', 'B2: -0.05 kg CO2-eq/kg BD', 'B3: 1.29 kg CO2-eq/kg BD', 'B4: 2.31 kg CO2-eq/kg BD']
[85]	Chemical	Integrated techno-economic and environmental analysis of butadiene production from biomass	Farzad et al.	2017	https://doi.org/10.1016/j.biortech.2017.04.130	Table S6.	7	Two-step EtOH conversion pathway (Scenario BD-b)	Yes.	Extract the entire table.	1,3-Butadiene production	Cradle-to-gate	1 t of 1,3-Butadiene	1	t	1,3-Butadiene	1,3-Butadiene	CML-IA baseline 3.02	['Abiotic depletion', 'Global warming potential (GWP 100)', 'Acidification', 'Eutrophication', 'Ozone depletion (ODP)', 'Photochemical oxidation (POCP)', 'Terrestrial and aquatic eco-toxicity', 'Human toxicity']	South Africa	['Scenario BD-b: 72 kg CO2-eq./tonne', 'Scenario BD-c: 72 kg CO2-eq./tonne']
[85]	Chemical	Integrated techno-economic and environmental analysis of butadiene production from biomass	Farzad et al.	2017	https://doi.org/10.1016/j.biortech.2017.04.130	Table S6.	7	Two-step EtOH conversion pathway (Scenario BD-c)	Yes.	Extract the entire table.	1,3-Butadiene production	Cradle-to-gate	1 t of 1,3-Butadiene	1	t	1,3-Butadiene	1,3-Butadiene	CML-IA baseline 3.02	['Abiotic depletion', 'Global warming potential (GWP 100)', 'Acidification', 'Eutrophication', 'Ozone depletion (ODP)', 'Photochemical oxidation (POCP)', 'Terrestrial and aquatic eco-toxicity', 'Human toxicity']	South Africa	['Scenario BD-b: 72 kg CO2-eq./tonne', 'Scenario BD-c: 72 kg CO2-eq./tonne']
[86]	Chemical	Butadiene from biomass, a life cycle perspective to address sustainability in the chemical industry	Cespi et al.	2016	https://doi.org/10.1039/C5GC02148K	Table S1.	1	Naphtha cracking pathway	Yes.	Extract the entire table.	1,3-Butadiene production	Cradle-to-gate	1 t of 1,3-Butadiene	1	t	1,3-Butadiene	1,3-Butadiene	ReCiPe	['Global warming potential (GWP)', 'Water depletion', 'Particulate matter formation', 'Fossil fuel depletion', 'Agricultural land occupation', 'Terrestrial eco-toxicity']	EU, Brazil, US	['Sugarcane-based Lebedev process: 2.04 t CO2-eq./t', 'Conventional route: 2.13 t CO2-eq./t', 'EU Lebedev process with residual wood-chips: 1.49 t CO2-eq./t']
[86]	Chemical	Butadiene from biomass, a life cycle perspective to address sustainability in the chemical industry	Cespi et al.	2016	https://doi.org/10.1039/C5GC02148K	Table S2.	1	Lebedev process pathway	Yes.	Extract the entire table.	1,3-Butadiene production	Cradle-to-gate	1 t of 1,3-Butadiene	1	t	1,3-Butadiene	1,3-Butadiene	ReCiPe	['Global warming potential (GWP)', 'Water depletion', 'Particulate matter formation', 'Fossil fuel depletion', 'Agricultural land occupation', 'Terrestrial eco-toxicity']	EU, Brazil, US	['Sugarcane-based Lebedev process: 2.04 t CO2-eq./t', 'Conventional route: 2.13 t CO2-eq./t', 'EU Lebedev process with residual wood-chips: 1.49 t CO2-eq./t']
[86]	Chemical	Butadiene from biomass, a life cycle perspective to address sustainability in the chemical industry	Cespi et al.	2016	https://doi.org/10.1039/C5GC02148K	Table S3.	2	Ostromisslensky process pathway	Yes.	Extract the entire table.	1,3-Butadiene production	Cradle-to-gate	1 t of 1,3-Butadiene	1	t	1,3-Butadiene	1,3-Butadiene	ReCiPe	['Global warming potential (GWP)', 'Water depletion', 'Particulate matter formation', 'Fossil fuel depletion', 'Agricultural land occupation', 'Terrestrial eco-toxicity']	EU, Brazil, US	['Sugarcane-based Lebedev process: 2.04 t CO2-eq./t', 'Conventional route: 2.13 t CO2-eq./t', 'EU Lebedev process with residual wood-chips: 1.49 t CO2-eq./t']
[87]	Chemical	Renewable butadiene: A case for hybrid processing via bio- and chemo-catalysis	Rodgers et al.	2022	https://doi.org/10.1016/j.jclepro.2022.132614	Not provided	/	/	/	/	/	Cradle-to-gate	1 kg of 1,3-Butadiene	1	kg	1,3-Butadiene	1,3-Butadiene	Not mentioned	['Global warming potential (GWP)']	China	['Acet-BD: -3.23 kg CO2-eq/kg butadiene', 'Eth-BD: -2.80 kg CO2-eq/kg butadiene', 'Syn-BD: -1.60 kg CO2-eq/kg butadiene']
[88]	Chemical	Comparative life cycle assessment of first- and second-generation bio-isobutene as a drop-in substitute for fossil isobutene	Fazeni-Fraisl and Lindorfer.	2022	https://doi.org/10.1002/bbb.2444	Table 4	8	IBN production from first-generation sugars	No. only inputs.	/	/	Cradle-to-gate	1 kg of isobutylene	1	kg	isobutylene	1,3-Butadiene	CML 2016	['Global warming potential (GWP)', 'Acidification potential (AP)', 'Eutrophication potential (EP)', 'Freshwater aquatic ecotoxicity potential', 'Human toxicity potential (HTP)', 'Marine aquatic ecotoxicity potential (MAETP)', 'Ozone depletion potential (ODP)', 'Photochemical ozone creation potential (POCP)', 'Terrestrial ecotoxicity potential (TETP)']	Unspecified EU country	['Scenario 1: 68% savings compared to fossil IBN', 'Scenario 4: 62% savings compared to fossil IBN', 'Scenario 5: 63% savings compared to fossil IBN', 'Scenario 8: 105% savings compared to fossil IBN', 'Scenario 9: 70% savings compared to fossil IBN', 'Scenario 7: 50% increase in GWP']
[88]	Chemical	Comparative life cycle assessment of first- and second-generation bio-isobutene as a drop-in substitute for fossil isobutene	Fazeni-Fraisl and Lindorfer.	2022	https://doi.org/10.1002/bbb.2444	Table 5.	9	IBN production from second-generation sugars.	No. only inputs.	/	/	Cradle-to-gate	1 kg of isobutylene	1	kg	isobutylene	1,3-Butadiene	CML 2016	['Global warming potential (GWP)', 'Acidification potential (AP)', 'Eutrophication potential (EP)', 'Freshwater aquatic ecotoxicity potential', 'Human toxicity potential (HTP)', 'Marine aquatic ecotoxicity potential (MAETP)', 'Ozone depletion potential (ODP)', 'Photochemical ozone creation potential (POCP)', 'Terrestrial ecotoxicity potential (TETP)']	Unspecified EU country	['Scenario 1: 68% savings compared to fossil IBN', 'Scenario 4: 62% savings compared to fossil IBN', 'Scenario 5: 63% savings compared to fossil IBN', 'Scenario 8: 105% savings compared to fossil IBN', 'Scenario 9: 70% savings compared to fossil IBN', 'Scenario 7: 50% increase in GWP']
[89]	Chemical	The techno-economic feasibility and carbon footprint of recycling and electrolysing CO2 emissions into ethanol and syngas in an isobutene biorefinery	Berger et al.	2022	https://doi.org/10.1016/j.spc.2022.05.014	Table 6.	16	Bio-IBN production (scenario 1)	Yes.	Extract the entire table.	Isobutylene production	Gate-to-gate	1 kg of isobutylene	1	kg	isobutylene	1,3-Butadiene	GaBi_ts 9.5	['Global warming potential (GWP)']	France	['Scenario 1: 0.293 kg CO2-eq./kg IBN', 'Scenario 2: 0.350 kg CO2-eq./kg EtOH', 'Scenario 3: 0.193 kg CO2-eq./kg Syngas']
[89]	Chemical	The techno-economic feasibility and carbon footprint of recycling and electrolysing CO2 emissions into ethanol and syngas in an isobutene biorefinery	Berger et al.	2022	https://doi.org/10.1016/j.spc.2022.05.014	Table 6.	16	Bio-IBN production (scenario 2)	Yes.	Extract the entire table.	Isobutylene production	Gate-to-gate	1 kg of isobutylene	1	kg	isobutylene	1,3-Butadiene	GaBi_ts 9.5	['Global warming potential (GWP)']	France	['Scenario 1: 0.293 kg CO2-eq./kg IBN', 'Scenario 2: 0.350 kg CO2-eq./kg EtOH', 'Scenario 3: 0.193 kg CO2-eq./kg Syngas']
[89]	Chemical	The techno-economic feasibility and carbon footprint of recycling and electrolysing CO2 emissions into ethanol and syngas in an isobutene biorefinery	Berger et al.	2022	https://doi.org/10.1016/j.spc.2022.05.014	Table 6.	16	Bio-IBN production (scenario 3)	Yes.	Extract the entire table.	Isobutylene production	Gate-to-gate	1 kg of isobutylene	1	kg	isobutylene	1,3-Butadiene	GaBi_ts 9.5	['Global warming potential (GWP)']	France	['Scenario 1: 0.293 kg CO2-eq./kg IBN', 'Scenario 2: 0.350 kg CO2-eq./kg EtOH', 'Scenario 3: 0.193 kg CO2-eq./kg Syngas']
[90]	Chemical	Environmental assessment of the production of itaconic acid from wheat straw under a biorefinery approach	Rebolledo-Leiva et al.	2022	https://doi.org/10.1016/j.biortech.2021.126481	Table 2.	4	Wheat straw-based pathway	Yes.	Extract the entire table.		Cradle-to-gate	1 kg of itaconic acid	1	kg	itaconic acid	Itaconic acid	ReCiPe midpoint 1.04v hierarchist method	['Global Warming (GW)', 'Particulate Matter (PM)', 'Freshwater Eutrophication (FE)', 'Marine Eutrophication (ME)', 'Human Carcinogenic Toxicity (HT)', 'Land Use (LU)', 'Fossil Resource Scarcity (FRS)', 'Water Consumption (WC)']	Puglia, Italy	['Baseline scenario: 14.33 kg CO2-eq', 'Scenario SE1: 12.72 kg CO2-eq', 'Scenario CE2: 2.64 kg CO2-eq']
[91]	Chemical	Sugarcane bagasse valorization to xylitol: Techno-economic and life cycle assessment	Shaji et al.	2022	https://doi.org/10.1002/bbb.2368	Table 1.	8	Sugarcane bagasse-to-xylitol pathway	No. Complex table	/	/	Cradle-to-gate	1 kg of xylitol	1	kg	xylitol	Xylitol	ReCiPe (H) Midpoint	['Global warming potential (GWP)', 'Water depletion', 'Human toxicity', 'Fossil depletion']	India	['Scenario 1: 1.807 kg CO2-eq./kg', 'Scenario 2: 1.385 kg CO2-eq./kg', 'Dasgupta et al.: 8.68 kg CO2-eq./kg', 'Hafyan et al.: 3.83 kg CO2-eq./kg', 'DuPont (XIVIAâ„¢): 3.59 kg CO2-eq./kg', 'Corn cob-based: 38.6 kg CO2-eq./kg']
[92]	Chemical	Life cycle assessment of an integrated xylitol biorefinery with value-added co-products	Vollmer et al.	2023	https://doi.org/10.1007/s11367-023-02194-6	Table 1.	5	wheat straw-to-xylitol pathway	Yes.	Extract the entire table.	Itaconic acid production	Cradle-to-gate	1 t of xylitol	1	t	xylitol	Xylitol	ReCiPe 2016 Midpoint H V1.05 and IMPACT2002+	['Global warming potential (GWP)', 'Ozone depletion', 'Ionizing radiation', 'Ozone formation, human health', 'Fine particulate matter formation', 'Ozone formation, terrestrial ecosystems', 'Terrestrial acidification', 'Freshwater eutrophication', 'Marine eutrophication', 'Terrestrial ecotoxicity', 'Freshwater ecotoxicity', 'Marine ecotoxicity', 'Human carcinogenic toxicity', 'Human non-carcinogen…	Denmark	['Xylitol biorefinery: 14.548 kg CO2-eq', 'DuPont process: 3.59 kg CO2-eq', 'Corncob process: 38.6 kg CO2-eq', 'Xylitol process train: 10.7783 kg CO2-eq']
[93]	Chemical	Life cycle assessment of fermentative xylitol production from wheat bran: A comparative evaluation of sulphuric acid and chemical-free wet air oxidation-based pretreatment	B.K et al.	2023	https://doi.org/10.1016/j.jclepro.2023.138666	Table 1.	4	Fermentative xylitol production (Wet air oxidation (WAO) pretreatment)	Yes.	Extract the entire table.	Xylitol production	Not mentioned	1 g/L of xylitol	1	g	xylitol	Xylitol	CML	['Global warming potential (GWP)', 'Acidification potential', 'Eutrophication potential', 'Human toxicity potential (HTP)', 'Marine Aquatic Ecotoxicity Potential (MAETP)', 'Freshwater Aquatic Ecotoxicity Potential (FAETP)']	India	['WAO: 1.476 kg CO2-eq.', 'DA: 5.288 kg CO2-eq.']
[93]	Chemical	Life cycle assessment of fermentative xylitol production from wheat bran: A comparative evaluation of sulphuric acid and chemical-free wet air oxidation-based pretreatment	B.K et al.	2023	https://doi.org/10.1016/j.jclepro.2023.138666	Table 1.	4	Fermentative xylitol production (Dilute-acid (DA) pretreatment)	Yes.	Extract the entire table.	Xylitol production	Not mentioned	1 g/L of xylitol	1	g	xylitol	Xylitol	CML	['Global warming potential (GWP)', 'Acidification potential', 'Eutrophication potential', 'Human toxicity potential (HTP)', 'Marine Aquatic Ecotoxicity Potential (MAETP)', 'Freshwater Aquatic Ecotoxicity Potential (FAETP)']	India	['WAO: 1.476 kg CO2-eq.', 'DA: 5.288 kg CO2-eq.']
[94]	Chemical	Energy and Material Flows and Carbon Footprint Assessment Concerning the Production of HMF and Furfural from a Cellulosic Biomass	Schöppe et al.	2020	https://doi.org/10.3390/pr8010119	Figure 2.	6	Biomass-to-furfural pathway	No. Figure.	/	/	Not mentioned	1 kg of furfural	1	kg	furfural	Furfural	Not mentioned	['Global warming potential (GWP)']	Not mentioned	['HMF: 326 - 1159 kg CO2-eq./kg', 'Furfural: 13.45 - 14.33 kg CO2-eq./kg']
[95]	Chemical	Comparison of pyrolysis and hydrolysis processes for furfural production from sugar beet pulp: A case study in southern Idaho, USA	Thompson et al.	2021	https://doi.org/10.1016/j.jclepro.2021.127695	Not provided	/	/	/	/	/	Gate-to-gate	1 t of furfural	1	t	furfural	Furfural	CMLIA baseline method	['Global warming potential (GWP)']	Southern Idaho, USA	['Pyrolysis: 267 kg CO2-eq./metric ton', 'Hydrolysis: 1095 kg CO2-eq./metric ton']
[96]	Chemical	Multi-objective Sustainability Assessment of Levulinic Acid Production from Empty Fruit Bunch	Hafyan et al.	2020	https://doi.org/10.1007/s41660-019-00097-4	Not provided	/	/	/	/	/	Gate-to-gate	1 t of levulinic acid	1	t	levulinic acid	Levulinic acid	IPCC 2007	['Global warming potential (GWP)']	Not mentioned	['Levulinic acid production: 11.6 kg CO2-eq/kg', 'Point S1: 174,041 kg CO2-eq', 'Point S3: 86,691 kg CO2-eq']
[97]	Chemical	Biomass to levulinic acid: A techno-economic analysis and sustainability of biorefinery processes in Southeast Asia	Isoni et al.	2018	https://doi.org/10.1016/j.jenvman.2018.03.012	Not provided	/	/	/	/	/	Not mentioned	20000 t of levulinic acid	20000	t	levulinic acid	Levulinic acid	Not mentioned	['Global warming potential (GWP)']	Southeast Asia	['Distillation (aqueous): 98-161 ktonne CO2-eq/yr', 'Distillation (MIBK): 12-20 ktonne CO2-eq/yr', 'Distillation (2-MeTHF): 0.6-0.9 ktonne CO2-eq/yr']
[98]	Chemical	Sustainability assessment of levulinic acid and succinic acid production from empty fruit bunch	Hafyan et al.	2019	10.1088/1757-899X/778/1/012140	Not provided	/	/	/	/	/	Gate-to-gate	1 kg of levulinic acid	1	kg	levulinic acid	Levulinic acid	Not mentioned	['Global warming potential (GWP)']	Malaysia	['Levulinic acid: 6.3 kg CO2-eq/kg', 'Succinic acid: 11.2 kg CO2-eq/kg']
[99]	Chemical	Technoeconomic and Life-Cycle Assessment for Electrocatalytic Production of Furandicarboxylic Acid	Patel et al.	2022	https://doi.org/10.1021/acssuschemeng.1c08602	Table S1.	2	Electrochemical production pathway	Yes.	The inventory table includes HMF production, FDCA synthesis, Flash separation, and FDCA purification. Do not record the HMF production phrase. Integrated the next phrases as the same table due to no output for FDCA synthesis. Fill FDCA as an output.	FDCA production	Cradle-to-gate	100 t of FDCA	100	t	FDCA	FDCA	ReCiPe 1.1 hierarchist method	['Agricultural land occupation', 'Climate change', 'Fossil depletion', 'Freshwater eutrophication', 'Freshwater ecotoxicity', 'Human toxicity', 'Marine ecotoxicity', 'Ozone depletion', 'Photochemical oxidant formation', 'Terrestrial acidification', 'Urban land occupation', 'Water depletion']	Quebec, Canada	Not mentioned
[99]	Chemical	Technoeconomic and Life-Cycle Assessment for Electrocatalytic Production of Furandicarboxylic Acid	Patel et al.	2022	https://doi.org/10.1021/acssuschemeng.1c08602	Table S2.	3	Thermochemical production pathway	Yes.	The inventory table includes HMF production, FDCA synthesis, Flash separation, and FDCA purification. Do not record the HMF production phrase. Integrated the next phrases as the same table due to no output for FDCA synthesis. Fill FDCA as an output.	FDCA production	Cradle-to-gate	100 t of FDCA	100	t	FDCA	FDCA	ReCiPe 1.1 hierarchist method	['Agricultural land occupation', 'Climate change', 'Fossil depletion', 'Freshwater eutrophication', 'Freshwater ecotoxicity', 'Human toxicity', 'Marine ecotoxicity', 'Ozone depletion', 'Photochemical oxidant formation', 'Terrestrial acidification', 'Urban land occupation', 'Water depletion']	Quebec, Canada	Not mentioned
[100]	Chemical	Sustainable Production of Bioplastics from Lignocellulosic Biomass: Technoeconomic Analysis and Life-Cycle Assessment	Kim et al.	2020	https://doi.org/10.1021/acssuschemeng.0c02872	Table 2.	6	Biomass-Derived FDCA production	Yes.	Only record the FDCA production.	FDCA production	Cradle-to-gate	1 kg of FDCA	1	kg	FDCA	FDCA	ReCiPe 1.13 with the Hierarchist perspective	['Climate change (CC)', 'Fossil depletion (FD)', 'Metal depletion', 'Water depletion', 'Freshwater ecotoxicity', 'Terrestrial ecotoxicity', 'Human toxicity', 'Freshwater eutrophication', 'Terrestrial acidification', 'Ozone depletion']	Worldwide	['Biomass-derived FDCA: 29% higher in CC compared to petroleum-derived TPA']
[101]	Chemical	Integrative technical, economic, and environmental sustainability analysis for the development process of biomass-derived 2,5-furandicarboxylic acid	Kim et al.	2022	https://doi.org/10.1016/j.rser.2021.112059	Table F.1.	9	Biomass-to-FDCA pathway	Yes.	Extract the entire table.	FDCA production	Cradle-to-gate	1 kg of FDCA	1	kg	FDCA	FDCA	ReCiPe 1.13 Hierarchist	['Climate change (CC)', 'Fossil depletion (FD)']	Not mentioned	['Total: 2.8 kg CO2-eq.', 'HMF production: 2.4 kg CO2-eq.', 'FDCA production: 0.24 kg CO2-eq.', 'Biomass fractionation: 0.16 kg CO2-eq.']
[102]	Chemical	Environmental sustainability assessment of HMF and FDCA production from lignocellutosic biomass through life cycle assessment (LCA)	Bello et al.	2018	https://doi.org/10.1515/hf-2018-0100	Table 1.	5	Lignocellulosic biomass-based pathway (purification through crystallization)	Yes.	The inventory table includes HMF production, FDCA synthesis, Flash separation, and FDCA purification. Do not record the HMF production phrase. Integrated the next phrases as the same table due to no output for FDCA synthesis. Fill FDCA as an output.	FDCA production	Cradle-to-gate	1 kg of FDCA	1	kg	FDCA	FDCA	ReCiPe 1.12 hierarchist	['Climate change (CC)', 'Ozone depletion (OD)', 'Terrestrial acidification (TA)', 'Freshwater eutrophication (FE)', 'Marine eutrophication (ME)', 'Human toxicity (HT)', 'Photochemical oxidant formation (POF)', 'Freshwater ecotoxicity (FET)', 'Marine ecotoxicity (MET)', 'Agricultural land occupation (ALO)', 'Fossil depletion (FD)']	Not mentioned	['Scenario 1: 47.1% contribution to CC', 'Scenario 2: 50% contribution to CC']
[102]	Chemical	Environmental sustainability assessment of HMF and FDCA production from lignocellutosic biomass through life cycle assessment (LCA)	Bello et al.	2018	https://doi.org/10.1515/hf-2018-0100	Table 2.	6	Lignocellulosic biomass-based pathway (purification through distillation)	Yes.	The inventory table includes HMF production, FDCA synthesis, Flash separation, and FDCA purification. Do not record the HMF production phrase. Integrated the next phrases as the same table due to no output for FDCA synthesis. Fill FDCA as an output.	FDCA production	Cradle-to-gate	1 kg of FDCA	1	kg	FDCA	FDCA	ReCiPe 1.12 hierarchist	['Climate change (CC)', 'Ozone depletion (OD)', 'Terrestrial acidification (TA)', 'Freshwater eutrophication (FE)', 'Marine eutrophication (ME)', 'Human toxicity (HT)', 'Photochemical oxidant formation (POF)', 'Freshwater ecotoxicity (FET)', 'Marine ecotoxicity (MET)', 'Agricultural land occupation (ALO)', 'Fossil depletion (FD)']	Not mentioned	['Scenario 1: 47.1% contribution to CC', 'Scenario 2: 50% contribution to CC']
[103]	Chemical	Towards improving the sustainability of bioplastics: Process modelling and life cycle assessment of two separation routes for 2,5-furandicarboxylic acid	Bello et al.	2020	https://doi.org/10.1016/j.seppur.2019.116056	Table 3.	7	Biomass-to-FDCA (crystallization separation-scenario A)	Yes.	Extract the entire table. Fill FDCA as an output.	FDCA production	Cradle-to-gate	1 kg of FDCA	1	kg	FDCA	FDCA	ReCiPe 1.1 hierarchist	['Global warming potential (GWP)', 'Ozone depletion (OD)', 'Ozone formation (OF)', 'Terrestrial acidification (TA)', 'Freshwater eutrophication (FE)', 'Marine eutrophication (ME)', 'Freshwater ecotoxicity (FET)', 'Marine ecotoxicity (MET)', 'Human toxicity (HT)', 'Fossil scarcity (FS)']	Not mentioned	['Scenario A: 61.46 kg CO2-eq/kg', 'Scenario B: 118.42 kg CO2-eq/kg']
[103]	Chemical	Towards improving the sustainability of bioplastics: Process modelling and life cycle assessment of two separation routes for 2,5-furandicarboxylic acid	Bello et al.	2020	https://doi.org/10.1016/j.seppur.2019.116056	Table 3.	7	Biomass-to-FDCA (distillation separation-scenario B)	Yes.	Extract the entire table. Fill FDCA as an output.	FDCA production	Cradle-to-gate	1 kg of FDCA	1	kg	FDCA	FDCA	ReCiPe 1.1 hierarchist	['Global warming potential (GWP)', 'Ozone depletion (OD)', 'Ozone formation (OF)', 'Terrestrial acidification (TA)', 'Freshwater eutrophication (FE)', 'Marine eutrophication (ME)', 'Freshwater ecotoxicity (FET)', 'Marine ecotoxicity (MET)', 'Human toxicity (HT)', 'Fossil scarcity (FS)']	Not mentioned	['Scenario A: 61.46 kg CO2-eq/kg', 'Scenario B: 118.42 kg CO2-eq/kg']
[104]	Chemical	Techno-economic analysis and environmental impact assessment of citric acid production through different recovery methods	Wang et al.	2019	https://doi.org/10.1016/j.jclepro.2019.119315	Not provided	/	/	/	/	/	Not mentioned	1 kg of citric acid	1	kg	citric acid	Citric acid	TRACI 2.1	['Global warming potential (GWP)', 'Acidification potential', 'Eutrophication potential', 'Fossil fuel resource depletion', 'Ecotoxicity potential', 'Ozone depletion', 'Photochemical smog formation', 'Human health impacts', 'Respiratory effects']	China	['S1: 4.7 kg CO2-eq/kg', 'S2: 6.1 kg CO2-eq/kg', 'S3: 3.1 kg CO2-eq/kg']
[105]	Chemical	Life-cycle sustainability of biomass-derived sorbitol: Proposing technological alternatives for improving the environmental profile of a bio-refinery platform molecule	Moreno et al.	2020	https://doi.org/10.1016/j.jclepro.2019.119568	Not provided	/	/	/	/	/	Cradle-to-gate	1000 kg of sorbitol	1000	kg	sorbitol	Sorbitol	ReCiPe	['Climate change (CC)', 'Ozone Depletion (OD)', 'Terrestrial Acidification (TA)', 'Human Toxicity (HT)', 'Particulate Matter Formation (PMF)', 'Fossil Fuels Depletion (FD)']	Not mentioned	['Enzymatic hydrolysis approach - Starch: 1194 kg CO2-eq', 'Enzymatic hydrolysis approach - Glucose: 4453 kg CO2-eq', 'Enzymatic hydrolysis approach - Sorbitol: 5088 kg CO2-eq', 'Acid hydrolysis approach - Starch: 1493 kg CO2-eq', 'Acid hydrolysis approach - Glucose: 1563 kg CO2-eq', 'Acid hydrolysis approach - Sorbitol: 2198 kg CO2-eq']
[106]	Chemical	Life Cycle Assessment of Biobased p-Xylene Production	Lin et al.	2015	https://doi.org/10.1021/ie5037287	Table 1.	5	Two-stage hydrolysis pathway	Yes.	Extract the entire table. Fill FDCA as an output.	p-Xylene production	Cradle-to-gate	1 t of p-Xylene	1	t	p-Xylene	p-Xylene	ReCiPe v1.0	['Ozone depletion', 'Human toxicity', 'Ecotoxicity', 'Ionizing radiation', 'Photochemical oxidant formation', 'Particulate matter formation', 'Climate change', 'Terrestrial ecotoxicity', 'Terrestrial acidification', 'Agricultural land occupation', 'Urban land occupation', 'Natural land transformation', 'Marine ecotoxicity', 'Marine eutrophication', 'Freshwater eutrophication', 'Freshwater ecotoxi…	United States	['Starch-based pX: 8540 kg CO2-eq', 'Oak-based pX: 1660 kg CO2-eq']
[106]	Chemical	Life Cycle Assessment of Biobased p-Xylene Production	Lin et al.	2015	https://doi.org/10.1021/ie5037287	Table 2.	5	Starch-based pathway	Yes.	Extract the entire table. Fill FDCA as an output.	p-Xylene production	Cradle-to-gate	1 t of p-Xylene	1	t	p-Xylene	p-Xylene	ReCiPe v1.0	['Ozone depletion', 'Human toxicity', 'Ecotoxicity', 'Ionizing radiation', 'Photochemical oxidant formation', 'Particulate matter formation', 'Climate change', 'Terrestrial ecotoxicity', 'Terrestrial acidification', 'Agricultural land occupation', 'Urban land occupation', 'Natural land transformation', 'Marine ecotoxicity', 'Marine eutrophication', 'Freshwater eutrophication', 'Freshwater ecotoxi…	United States	['Starch-based pX: 8540 kg CO2-eq', 'Oak-based pX: 1660 kg CO2-eq']
[107]	Chemical	Techno-economic and life cycle analysis of different types of hydrolysis process for the production of p-Xylene	Athaley et al.	2019	https://doi.org/10.1016/j.compchemeng.2018.11.018	Not provided	/	/	/	/	/	Cradle-to-gate	1 t of p-Xylene	1	t	p-Xylene	p-Xylene	ReCiPe midpoint method	['Climate change', 'Water depletion', 'Ecotoxicity', 'Fossil depletion', 'Land occupation']	USA	Not mentioned

## Sheet: Inventory_data
New_ID	LCI inventory pathway	Reference product	Inventory activity	Flow name	Input/Output	Amount	Unit	Is_reference_flow	Type
[2]	Coal Gasification to MeOH (CGTM)	Methanol	Methanol production	Synthetic gas	Input	1.23	t	FALSE	Has_Input
[2]	Coal Gasification to MeOH (CGTM)	Methanol	Methanol production	Electricity	Input	825	kWh	FALSE	Has_Input
[2]	Coal Gasification to MeOH (CGTM)	Methanol	Methanol production	NaOH (10%)	Input	1	t	FALSE	Has_Input
[2]	Coal Gasification to MeOH (CGTM)	Methanol	Methanol production	Water	Input	14.2	kg	FALSE	Has_Input
[2]	Coal Gasification to MeOH (CGTM)	Methanol	Methanol production	Methanol	Output	1	t	TRUE	Has_Output
[2]	Coal Gasification to MeOH (CGTM)	Methanol	Methanol production	Flue gas	Output	0.07	t	FALSE	Has_Output
[2]	Coal Gasification to MeOH (CGTM)	Methanol	Methanol production	Effluents	Output	0.266	t	FALSE	Has_Output
[2]	Coal Coking to MeOH (COTM)	Methanol	Methanol production	COG	Input	1968.66	Nm^3	FALSE	Has_Input
[2]	Coal Coking to MeOH (COTM)	Methanol	Methanol production	Electricity	Input	678.32	kWh	FALSE	Has_Input
[2]	Coal Coking to MeOH (COTM)	Methanol	Methanol production	Low-pressure steam	Input	938.4	kg	FALSE	Has_Input
[2]	Coal Coking to MeOH (COTM)	Methanol	Methanol production	Medium-pressure steam	Input	2.25	t	FALSE	Has_Input
[2]	Coal Coking to MeOH (COTM)	Methanol	Methanol production	Desalinated water	Input	1.14	t	FALSE	Has_Input
[2]	Coal Coking to MeOH (COTM)	Methanol	Methanol production	Fresh water	Input	6.19	t	FALSE	Has_Input
[2]	Coal Coking to MeOH (COTM)	Methanol	Methanol production	Methanol	Output	1	t	TRUE	Has_Output
[2]	Coal Coking to MeOH (COTM)	Methanol	Methanol production	Exhausted gas	Output	676.3	m^3	FALSE	Has_Output
[2]	Natural Gas to MeOH (NGTM)	Methanol	Methanol production	Natural gas	Input	617	Nm^3	FALSE	Has_Input
[2]	Natural Gas to MeOH (NGTM)	Methanol	Methanol production	Electricity	Input	576.4	kWh	FALSE	Has_Input
[2]	Natural Gas to MeOH (NGTM)	Methanol	Methanol production	Oxygen	Input	142	Nm^3	FALSE	Has_Input
[2]	Natural Gas to MeOH (NGTM)	Methanol	Methanol production	Desalinated water	Input	3.6	t	FALSE	Has_Input
[2]	Natural Gas to MeOH (NGTM)	Methanol	Methanol production	Fresh water	Input	11	t	FALSE	Has_Input
[2]	Natural Gas to MeOH (NGTM)	Methanol	Methanol production	Sodium hydroxide	Input	0.2	kg	FALSE	Has_Input
[2]	Natural Gas to MeOH (NGTM)	Methanol	Methanol production	Trisodium phosphate	Input	0.15	kg	FALSE	Has_Input
[2]	Natural Gas to MeOH (NGTM)	Methanol	Methanol production	Methanol	Output	1	t	TRUE	Has_Output
[2]	Biomass to MeOH (BOTM)	Methanol	Methanol production	H2	Input	136.11	kg	FALSE	Has_Input
[2]	Biomass to MeOH (BOTM)	Methanol	Methanol production	CO	Input	874.95	kg	FALSE	Has_Input
[2]	Biomass to MeOH (BOTM)	Methanol	Methanol production	CO2	Input	34.3	kg	FALSE	Has_Input
[2]	Biomass to MeOH (BOTM)	Methanol	Methanol production	Electricity	Input	217.4	kWh	FALSE	Has_Input
[2]	Biomass to MeOH (BOTM)	Methanol	Methanol production	Water	Input	10.8	t	FALSE	Has_Input
[2]	Biomass to MeOH (BOTM)	Methanol	Methanol production	Steam	Input	0.8	t	FALSE	Has_Input
[2]	Biomass to MeOH (BOTM)	Methanol	Methanol production	Methanol	Output	1	t	TRUE	Has_Output
[2]	CO2 Capture to MeOH (CCTM)	Methanol	Methanol production	H2	Input	220.6	kg	FALSE	Has_Input
[2]	CO2 Capture to MeOH (CCTM)	Methanol	Methanol production	CO2	Input	1617.4	kg	FALSE	Has_Input
[2]	CO2 Capture to MeOH (CCTM)	Methanol	Methanol production	Electricity	Input	271.4	kWh	FALSE	Has_Input
[2]	CO2 Capture to MeOH (CCTM)	Methanol	Methanol production	Water	Input	10.8	t	FALSE	Has_Input
[2]	CO2 Capture to MeOH (CCTM)	Methanol	Methanol production	Steam	Input	0.8	t	FALSE	Has_Input
[2]	CO2 Capture to MeOH (CCTM)	Methanol	Methanol production	Methanol	Output	1	t	TRUE	Has_Output
[3]	Rice straw-based pathway	Methanol	Methanol production	Electricity	Input	0.185	kWh	FALSE	Has_Input
[3]	Rice straw-based pathway	Methanol	Methanol production	Diesel	Input	0.000255	kg	FALSE	Has_Input
[3]	Rice straw-based pathway	Methanol	Methanol production	Methanol	Output	1	kg	TRUE	Has_Output
[5]	Conventional natural gas-based pathway (ACONV)	Methanol	Methanol production	Electrode/Catalyst	Input	0.00039	kg	FALSE	Has_Input
[5]	Conventional natural gas-based pathway (ACONV)	Methanol	Methanol production	H2O	Input	0.85	kg	FALSE	Has_Input
[5]	Conventional natural gas-based pathway (ACONV)	Methanol	Methanol production	Natural gas (high pressure)	Input	0.652	m^3	FALSE	Has_Input
[5]	Conventional natural gas-based pathway (ACONV)	Methanol	Methanol production	Electricity	Input	0.147	kWh	FALSE	Has_Input
[5]	Conventional natural gas-based pathway (ACONV)	Methanol	Methanol production	Steam	Input	6.93	MJ	FALSE	Has_Input
[5]	Conventional natural gas-based pathway (ACONV)	Methanol	Methanol production	Methanol	Output	1	kg	TRUE	Has_Output
[5]	Conventional natural gas-based pathway (ACONV)	Methanol	Methanol production	H2O	Output	0.003	kg	FALSE	Has_Output
[5]	Direct hydrogenation of CO2 pathway (ADH)	Methanol	Methanol production	Electrode/Catalyst	Input	9.23e-05	kg	FALSE	Has_Input
[5]	Direct hydrogenation of CO2 pathway (ADH)	Methanol	Methanol production	CO2	Input	1.38	kg	FALSE	Has_Input
[5]	Direct hydrogenation of CO2 pathway (ADH)	Methanol	Methanol production	H2O	Input	1.99	kg	FALSE	Has_Input
[5]	Direct hydrogenation of CO2 pathway (ADH)	Methanol	Methanol production	Electricity	Input	11.9	kWh	FALSE	Has_Input
[5]	Direct hydrogenation of CO2 pathway (ADH)	Methanol	Methanol production	Steam	Input	4.62	MJ	FALSE	Has_Input
[5]	Direct hydrogenation of CO2 pathway (ADH)	Methanol	Methanol production	Methanol	Output	1	kg	TRUE	Has_Output
[5]	Direct hydrogenation of CO2 pathway (ADH)	Methanol	Methanol production	H2O	Output	0.003	kg	FALSE	Has_Output
[5]	Direct hydrogenation of CO2 pathway (ADH)	Methanol	Methanol production	H2O (by-product)	Output	0.765	kg	FALSE	Has_Output
[5]	Electrochemical reduction of CO2 pathway (AER)	Methanol	Methanol production	Electrode/Catalyst	Input	0.000145	kg	FALSE	Has_Input
[5]	Electrochemical reduction of CO2 pathway (AER)	Methanol	Methanol production	CO2	Input	1.38	kg	FALSE	Has_Input
[5]	Electrochemical reduction of CO2 pathway (AER)	Methanol	Methanol production	H2O	Input	3.13	kg	FALSE	Has_Input
[5]	Electrochemical reduction of CO2 pathway (AER)	Methanol	Methanol production	Electricity	Input	50.5	kWh	FALSE	Has_Input
[5]	Electrochemical reduction of CO2 pathway (AER)	Methanol	Methanol production	Steam	Input	13729	MJ	FALSE	Has_Input
[5]	Electrochemical reduction of CO2 pathway (AER)	Methanol	Methanol production	Methanol	Output	1	kg	TRUE	Has_Output
[5]	Electrochemical reduction of CO2 pathway (AER)	Methanol	Methanol production	H2O	Output	0.003	kg	FALSE	Has_Output
[6]	Olive pomace gasification pathway	Methanol	Methanol production	Clean syngas	Input	1.93	kg	FALSE	Has_Input
[6]	Olive pomace gasification pathway	Methanol	Methanol production	Energy	Input	0.357	MJ	FALSE	Has_Input
[6]	Olive pomace gasification pathway	Methanol	Methanol production	Cu/Zn	Input	1.75	kg	FALSE	Has_Input
[6]	Olive pomace gasification pathway	Methanol	Methanol production	Methanol	Output	1	kg	TRUE	Has_Output
[6]	Olive pomace gasification pathway	Methanol	Methanol production	Recycling gas	Output	0.922	kg	FALSE	Has_Output
[6]	Olive pomace gasification pathway	Methanol	Methanol production	Cu/Zn (waste)	Output	1.75	kg	FALSE	Has_Output
[6]	Olive pomace gasification pathway	Methanol	Methanol production	H2O	Output	0.00481	kg	FALSE	Has_Output
[6]	Olive pomace gasification pathway	Methanol	Methanol production	Heat	Output	4.39	MJ	FALSE	Has_Output
[6]	Natural gas pathway	Methanol	Methanol production	Clean syngas	Input	1.22	kg	FALSE	Has_Input
[6]	Natural gas pathway	Methanol	Methanol production	Energy	Input	7.62	MJ	FALSE	Has_Input
[6]	Natural gas pathway	Methanol	Methanol production	Methanol	Output	1	kg	TRUE	Has_Output
[6]	Natural gas pathway	Methanol	Methanol production	Heat	Output	15.5	MJ	FALSE	Has_Output
[6]	Natural gas pathway	Methanol	Methanol production	CO	Output	0.0386	kg	FALSE	Has_Output
[6]	Natural gas pathway	Methanol	Methanol production	CO2	Output	0.00111	kg	FALSE	Has_Output
[6]	Natural gas pathway	Methanol	Methanol production	CH4	Output	0.00201	kg	FALSE	Has_Output
[6]	Natural gas pathway	Methanol	Methanol production	H2	Output	0.176	kg	FALSE	Has_Output
[8]	Photocatalytic conversion pathway	Methanol	Methanol production	Ferric oxide	Input	2.29e-06	kg	FALSE	Has_Input
[8]	Photocatalytic conversion pathway	Methanol	Methanol production	Dye, perylenes	Input	2.29e-06	kg	FALSE	Has_Input
[8]	Photocatalytic conversion pathway	Methanol	Methanol production	TiO2	Input	4.58e-05	kg	FALSE	Has_Input
[8]	Photocatalytic conversion pathway	Methanol	Methanol production	CO2	Input	1.53	kg	FALSE	Has_Input
[8]	Photocatalytic conversion pathway	Methanol	Methanol production	MEA	Input	0.0199	kg	FALSE	Has_Input
[8]	Photocatalytic conversion pathway	Methanol	Methanol production	Heat	Input	4.73	MJ	FALSE	Has_Input
[8]	Photocatalytic conversion pathway	Methanol	Methanol production	Electricity	Input	2.02	MJ	FALSE	Has_Input
[8]	Photocatalytic conversion pathway	Methanol	Methanol production	Water	Input	1.25	kg	FALSE	Has_Input
[8]	Photocatalytic conversion pathway	Methanol	Methanol production	Methanol	Output	1	kg	TRUE	Has_Output
[8]	Hydrogenation conversion pathway	Methanol	Methanol production	La	Input	9.88e-05	kg	FALSE	Has_Input
[8]	Hydrogenation conversion pathway	Methanol	Methanol production	Cu	Input	0.000448	kg	FALSE	Has_Input
[8]	Hydrogenation conversion pathway	Methanol	Methanol production	ZrO2	Input	0.000756	kg	FALSE	Has_Input
[8]	Hydrogenation conversion pathway	Methanol	Methanol production	CO2	Input	1.4	kg	FALSE	Has_Input
[8]	Hydrogenation conversion pathway	Methanol	Methanol production	MEA	Input	0.0182	kg	FALSE	Has_Input
[8]	Hydrogenation conversion pathway	Methanol	Methanol production	Heat	Input	5.17	MJ	FALSE	Has_Input
[8]	Hydrogenation conversion pathway	Methanol	Methanol production	Electricity	Input	2.2	MJ	FALSE	Has_Input
[8]	Hydrogenation conversion pathway	Methanol	Methanol production	H2	Input	0.2	kg	FALSE	Has_Input
[8]	Hydrogenation conversion pathway	Methanol	Methanol production	Electricity for H2 supply	Input	13.27	MJ	FALSE	Has_Input
[8]	Hydrogenation conversion pathway	Methanol	Methanol production	Methanol factory	Input	3.72e-11	p	FALSE	Has_Input
[8]	Hydrogenation conversion pathway	Methanol	Methanol production	Water	Input	0.85	kg	FALSE	Has_Input
[8]	Hydrogenation conversion pathway	Methanol	Methanol production	Electricity	Input	40.32	MJ	FALSE	Has_Input
[8]	Hydrogenation conversion pathway	Methanol	Methanol production	Heat for operation	Input	2.99	MJ	FALSE	Has_Input
[8]	Hydrogenation conversion pathway	Methanol	Methanol production	Methanol	Output	1	kg	TRUE	Has_Output
[10]	Coal-to-methanol (CTM) pathway	Methanol	Methanol synthesis and purification	Syngas	Input	93.13	t	FALSE	Has_Input
[10]	Coal-to-methanol (CTM) pathway	Methanol	Methanol synthesis and purification	Electricity	Input	782.79	kWh	FALSE	Has_Input
[10]	Coal-to-methanol (CTM) pathway	Methanol	Methanol synthesis and purification	Steam	Input	430773	MJ	FALSE	Has_Input
[10]	Coal-to-methanol (CTM) pathway	Methanol	Methanol synthesis and purification	Methanol	Output	78.98	t	TRUE	Has_Output
[10]	Coal-to-methanol (CTM) pathway	Methanol	Methanol synthesis and purification	CO2	Output	296.13	kg	FALSE	Has_Output
[10]	Coal-to-methanol (CTM) pathway	Methanol	Methanol synthesis and purification	CO	Output	45.64	kg	FALSE	Has_Output
[10]	Coal-to-methanol (CTM) pathway	Methanol	Methanol synthesis and purification	VOC	Output	534.04	kg	FALSE	Has_Output
[10]	Coal-to-methanol (CTM) pathway	Methanol	Methanol synthesis and purification	Waste water	Output	5004	kg	FALSE	Has_Output
[10]	Biomass-to-methanol (BTM) pathway	Methanol	Methanol synthesis and purification	Syngas	Input	101.8	t	FALSE	Has_Input
[10]	Biomass-to-methanol (BTM) pathway	Methanol	Methanol synthesis and purification	Electricity	Input	782.79	kWh	FALSE	Has_Input
[10]	Biomass-to-methanol (BTM) pathway	Methanol	Methanol synthesis and purification	Steam	Input	430773	MJ	FALSE	Has_Input
[10]	Biomass-to-methanol (BTM) pathway	Methanol	Methanol synthesis and purification	Methanol	Output	79.08	t	TRUE	Has_Output
[10]	Biomass-to-methanol (BTM) pathway	Methanol	Methanol synthesis and purification	CH4	Output	9425.96	kg	FALSE	Has_Output
[10]	Biomass-to-methanol (BTM) pathway	Methanol	Methanol synthesis and purification	CO2	Output	262.68	kg	FALSE	Has_Output
[10]	Biomass-to-methanol (BTM) pathway	Methanol	Methanol synthesis and purification	CO	Output	49	kg	FALSE	Has_Output
[10]	Biomass-to-methanol (BTM) pathway	Methanol	Methanol synthesis and purification	VOC	Output	780.36	kg	FALSE	Has_Output
[10]	Biomass-to-methanol (BTM) pathway	Methanol	Methanol synthesis and purification	Waste water	Output	5210	kg	FALSE	Has_Output
[11]	Coal gasification pathway	Methanol	Methanol production	Synthesis gas	Input	196974	kg	FALSE	Has_Input
[11]	Coal gasification pathway	Methanol	Methanol production	Electricity	Input	0.09	kWh	FALSE	Has_Input
[11]	Coal gasification pathway	Methanol	Methanol production	Raw methanol	Output	66005	kg	TRUE	Has_Output
[11]	Coal gasification pathway	Methanol	Methanol production	Gas to combustion	Output	130917	kg	FALSE	Has_Output
[11]	Coal gasification pathway	Methanol	Methanol production	Raw methanol	Input	66005	kg	TRUE	Has_Input
[11]	Coal gasification pathway	Methanol	Methanol distillation	Sodium hydroxide 10%	Input	58	kg	FALSE	Has_Input
[11]	Coal gasification pathway	Methanol	Methanol distillation	Water	Input	811000	kg	FALSE	Has_Input
[11]	Coal gasification pathway	Methanol	Methanol distillation	Sand and gravel (filter)	Input	0.19	dm^3	FALSE	Has_Input
[11]	Coal gasification pathway	Methanol	Methanol distillation	Electricity	Input	609	kWh	FALSE	Has_Input
[11]	Coal gasification pathway	Methanol	Methanol distillation	Methanol	Output	57111	kg	TRUE	Has_Output
[11]	Coal gasification pathway	Methanol	Methanol distillation	Gas to combustion	Output	130917	kg	FALSE	Has_Output
[11]	Coal gasification pathway	Methanol	Methanol distillation	Effluents	Output	15191	kg	FALSE	Has_Output
[11]	Coal gasification pathway	Methanol	Methanol distillation	Sand and gravel (filter)	Output	0.19	dm^3	FALSE	Has_Output
[12]	Conventional pathway (natural gas-based)	Methanol	Methanol synthesis, separation and purification	Effluent gas	Input	5.3	kg	FALSE	Has_Input
[12]	Conventional pathway (natural gas-based)	Methanol	Methanol synthesis, separation and purification	Electricity	Input	0.3063	kWh	FALSE	Has_Input
[12]	Conventional pathway (natural gas-based)	Methanol	Methanol synthesis, separation and purification	Cooling energy	Input	1.5591	kWh	FALSE	Has_Input
[12]	Conventional pathway (natural gas-based)	Methanol	Methanol synthesis, separation and purification	Heating energy	Input	0.798121	kWh	FALSE	Has_Input
[12]	Conventional pathway (natural gas-based)	Methanol	Methanol synthesis, separation and purification	Methanol	Output	1	kg	TRUE	Has_Output
[12]	Conventional pathway (natural gas-based)	Methanol	Methanol synthesis, separation and purification	Methanol overhead (vent)	Output	0.001494	kg	FALSE	Has_Output
[12]	Conventional pathway (natural gas-based)	Methanol	Methanol synthesis, separation and purification	Methanol Bottom	Output	1e-05	kg	FALSE	Has_Output
[12]	Conventional pathway (natural gas-based)	Methanol	Methanol synthesis, separation and purification	Methane overhead	Output	5.83e-06	kg	FALSE	Has_Output
[12]	Conventional pathway (natural gas-based)	Methanol	Methanol synthesis, separation and purification	Methane overhead (vent) methane	Output	2.33e-05	kg	FALSE	Has_Output
[12]	Conventional pathway (natural gas-based)	Methanol	Methanol synthesis, separation and purification	Bottom methane	Output	2.77e-16	kg	FALSE	Has_Output
[12]	Conventional pathway (natural gas-based)	Methanol	Methanol synthesis, separation and purification	H2 overhead	Output	8.97e-08	kg	FALSE	Has_Output
[12]	Conventional pathway (natural gas-based)	Methanol	Methanol synthesis, separation and purification	H2 overhead (vent)	Output	4.78e-06	kg	FALSE	Has_Output
[12]	Conventional pathway (natural gas-based)	Methanol	Methanol synthesis, separation and purification	Bottom H2	Output	4.41e-18	kg	FALSE	Has_Output
[12]	Conventional pathway (natural gas-based)	Methanol	Methanol synthesis, separation and purification	CO2 overhead	Output	0.000829	kg	FALSE	Has_Output
[12]	Conventional pathway (natural gas-based)	Methanol	Methanol synthesis, separation and purification	CO2 overhead (vent)	Output	0.000421	kg	FALSE	Has_Output
[12]	Conventional pathway (natural gas-based)	Methanol	Methanol synthesis, separation and purification	Bottom CO2	Output	5.21e-61	kg	FALSE	Has_Output
[12]	Conventional pathway (natural gas-based)	Methanol	Methanol synthesis, separation and purification	H2O overhead	Output	2.64e-09	kg	FALSE	Has_Output
[12]	Conventional pathway (natural gas-based)	Methanol	Methanol synthesis, separation and purification	H2O overhead (vent)	Output	1.28e-12	kg	FALSE	Has_Output
[12]	Conventional pathway (natural gas-based)	Methanol	Methanol synthesis, separation and purification	Bottom H2O	Output	0.2644	kg	FALSE	Has_Output
[12]	Conventional pathway (natural gas-based)	Methanol	Methanol synthesis, separation and purification	N2 overhead	Output	1.77e-06	kg	FALSE	Has_Output
[12]	Conventional pathway (natural gas-based)	Methanol	Methanol synthesis, separation and purification	N2 overhead (vent)	Output	1.52e-05	kg	FALSE	Has_Output
[12]	Conventional pathway (natural gas-based)	Methanol	Methanol synthesis, separation and purification	Bottom N2	Output	8.46e-17	kg	FALSE	Has_Output
[12]	Thermochemical hydrogenation of CO2 pathway (with recycling)	Methanol	Methanol synthesis, separation and purification	Electricity	Input	0.2749	kWh	FALSE	Has_Input
[12]	Thermochemical hydrogenation of CO2 pathway (with recycling)	Methanol	Methanol synthesis, separation and purification	Cooling energy	Input	1.832	kWh	FALSE	Has_Input
[12]	Thermochemical hydrogenation of CO2 pathway (with recycling)	Methanol	Methanol synthesis, separation and purification	Heating energy	Input	0.6651	kWh	FALSE	Has_Input
[12]	Thermochemical hydrogenation of CO2 pathway (with recycling)	Methanol	Methanol synthesis, separation and purification	Purge	Output	0.437	Unit	FALSE	Has_Output
[12]	Thermochemical hydrogenation of CO2 pathway (with recycling)	Methanol	Methanol synthesis, separation and purification	Methanol	Output	1	kg	TRUE	Has_Output
[12]	Thermochemical hydrogenation of CO2 pathway (with recycling)	Methanol	Methanol synthesis, separation and purification	Methanol bottom	Output	0.001	kg	FALSE	Has_Output
[12]	Thermochemical hydrogenation of CO2 pathway (with recycling)	Methanol	Methanol synthesis, separation and purification	CO overhead	Output	9.31e-09	kg	FALSE	Has_Output
[12]	Thermochemical hydrogenation of CO2 pathway (with recycling)	Methanol	Methanol synthesis, separation and purification	CO bottom	Output	9.93e-19	kg	FALSE	Has_Output
[12]	Thermochemical hydrogenation of CO2 pathway (with recycling)	Methanol	Methanol synthesis, separation and purification	CO2 overhead	Output	0.000313	kg	FALSE	Has_Output
[12]	Thermochemical hydrogenation of CO2 pathway (with recycling)	Methanol	Methanol synthesis, separation and purification	CO2 bottom	Output	3.34e-14	kg	FALSE	Has_Output
[12]	Thermochemical hydrogenation of CO2 pathway (with recycling)	Methanol	Methanol synthesis, separation and purification	H2O overhead	Output	0.0006	kg	FALSE	Has_Output
[12]	Thermochemical hydrogenation of CO2 pathway (with recycling)	Methanol	Methanol synthesis, separation and purification	H2O bottom	Output	0.5997	kg	FALSE	Has_Output
[12]	Thermochemical hydrogenation of CO2 pathway (with recycling)	Methanol	Methanol synthesis, separation and purification	H2 overhead	Output	2.78e-09	kg	FALSE	Has_Output
[12]	Thermochemical hydrogenation of CO2 pathway (with recycling)	Methanol	Methanol synthesis, separation and purification	H2 bottom	Output	2.97e-19	kg	FALSE	Has_Output
[12]	Electrochemical CO2 reduction pathway (with recycling)	Methanol	Methanol synthesis, separation and purification	Electrolyte (1M KOH)	Input	12.0827	kg	FALSE	Has_Input
[12]	Electrochemical CO2 reduction pathway (with recycling)	Methanol	Methanol synthesis, separation and purification	Electricity	Input	66.4241	kWh	FALSE	Has_Input
[12]	Electrochemical CO2 reduction pathway (with recycling)	Methanol	Methanol synthesis, separation and purification	Cooling energy	Input	0.9208	kWh	FALSE	Has_Input
[12]	Electrochemical CO2 reduction pathway (with recycling)	Methanol	Methanol synthesis, separation and purification	Heating energy	Input	0.044194	kWh	FALSE	Has_Input
[12]	Electrochemical CO2 reduction pathway (with recycling)	Methanol	Methanol synthesis, separation and purification	Heating energy (Purification)	Input	0.5457	kWh	FALSE	Has_Input
[12]	Electrochemical CO2 reduction pathway (with recycling)	Methanol	Methanol synthesis, separation and purification	Cooling energy (Purification)	Input	0.4862	kWh	FALSE	Has_Input
[12]	Electrochemical CO2 reduction pathway (with recycling)	Methanol	Methanol synthesis, separation and purification	Purge (recycles)	Output	26.0591	kg	FALSE	Has_Output
[12]	Electrochemical CO2 reduction pathway (with recycling)	Methanol	Methanol synthesis, separation and purification	Methanol	Output	1	kg	TRUE	Has_Output
[12]	Electrochemical CO2 reduction pathway (with recycling)	Methanol	Methanol synthesis, separation and purification	Methanol bottom	Output	0.001001	kg	FALSE	Has_Output
[12]	Electrochemical CO2 reduction pathway (with recycling)	Methanol	Methanol synthesis, separation and purification	H2O overhead	Output	1.27e-06	kg	FALSE	Has_Output
[12]	Electrochemical CO2 reduction pathway (with recycling)	Methanol	Methanol synthesis, separation and purification	H2O bottom	Output	0.001266	kg	FALSE	Has_Output
[12]	Electrochemical CO2 reduction pathway (with recycling)	Methanol	Methanol synthesis, separation and purification	CO2 overhead	Output	0.000243	kg	FALSE	Has_Output
[12]	Electrochemical CO2 reduction pathway (with recycling)	Methanol	Methanol synthesis, separation and purification	CO2 bottom	Output	1.21e-12	kg	FALSE	Has_Output
[12]	Electrochemical CO2 reduction pathway (with recycling)	Methanol	Methanol synthesis, separation and purification	H2 overhead	Output	1.03e-10	kg	FALSE	Has_Output
[12]	Electrochemical CO2 reduction pathway (with recycling)	Methanol	Methanol synthesis, separation and purification	H2 bottom	Output	5.12e-14	kg	FALSE	Has_Output
[12]	Electrochemical CO2 reduction pathway (with recycling)	Methanol	Methanol synthesis, separation and purification	CH3COOH overhead	Output	7.29e-07	kg	FALSE	Has_Output
[12]	Electrochemical CO2 reduction pathway (with recycling)	Methanol	Methanol synthesis, separation and purification	CH3COOH bottom	Output	0.043001	kg	FALSE	Has_Output
[12]	Electrochemical CO2 reduction pathway (with recycling)	Methanol	Methanol synthesis, separation and purification	HCOOH overhead	Output	1.84e-06	kg	FALSE	Has_Output
[12]	Electrochemical CO2 reduction pathway (with recycling)	Methanol	Methanol synthesis, separation and purification	HCOOH bottom	Output	0.033551	kg	FALSE	Has_Output
[19]	Coke oven gas (COG)-based pathway	Methanol	Methanol production	COG	Input	1968.66	Nm^3	FALSE	Has_Input
[19]	Coke oven gas (COG)-based pathway	Methanol	Methanol production	Electricity	Input	678.32	kWh	FALSE	Has_Input
[19]	Coke oven gas (COG)-based pathway	Methanol	Methanol production	Medium-pressure steam	Input	2.25	t	FALSE	Has_Input
[19]	Coke oven gas (COG)-based pathway	Methanol	Methanol production	Desalinated water	Input	1.14	t	FALSE	Has_Input
[19]	Coke oven gas (COG)-based pathway	Methanol	Methanol production	Fresh water	Input	6.19	t	FALSE	Has_Input
[19]	Coke oven gas (COG)-based pathway	Methanol	Methanol production	Methanol	Output	1	t	TRUE	Has_Output
[19]	Coke oven gas (COG)-based pathway	Methanol	Methanol production	Low-pressure steam	Output	938.4	kg	FALSE	Has_Output
[19]	Coke oven gas (COG)-based pathway	Methanol	Methanol production	Exhausted gas	Output	676.35	m^3	FALSE	Has_Output
[19]	Coal-based pathway	Methanol	Methanol production	Coal	Input	1.57	t	FALSE	Has_Input
[19]	Coal-based pathway	Methanol	Methanol production	Electricity	Input	192.28	kWh	FALSE	Has_Input
[19]	Coal-based pathway	Methanol	Methanol production	Low-pressure steam	Input	3.65	t	FALSE	Has_Input
[19]	Coal-based pathway	Methanol	Methanol production	Fresh water	Input	9.03	t	FALSE	Has_Input
[19]	Coal-based pathway	Methanol	Methanol production	Methanol	Output	1	t	TRUE	Has_Output
[19]	Coal-based pathway	Methanol	Methanol production	Ammonium sulphate	Output	20	kg	FALSE	Has_Output
[19]	Coal-based pathway	Methanol	Methanol production	Sulphur	Output	10	kg	FALSE	Has_Output
[19]	Natural gas-based pathway	Methanol	Methanol production	Natural gas	Input	617	Nm^3	FALSE	Has_Input
[19]	Natural gas-based pathway	Methanol	Methanol production	Electricity	Input	576.4	kWh	FALSE	Has_Input
[19]	Natural gas-based pathway	Methanol	Methanol production	Oxygen	Input	142	Nm^3	FALSE	Has_Input
[19]	Natural gas-based pathway	Methanol	Methanol production	Desalinated water	Input	3.6	t	FALSE	Has_Input
[19]	Natural gas-based pathway	Methanol	Methanol production	Fresh water	Input	11	t	FALSE	Has_Input
[19]	Natural gas-based pathway	Methanol	Methanol production	Sodium hydroxide	Input	0.2	kg	FALSE	Has_Input
[19]	Natural gas-based pathway	Methanol	Methanol production	Trisodium phosphate	Input	0.15	kg	FALSE	Has_Input
[19]	Natural gas-based pathway	Methanol	Methanol production	Methanol	Output	1	t	TRUE	Has_Output
[20]	Coal-CH3OH technical pathway	Methanol	Methanol synthesis and purification	Electricity	Input	10.04	kWh	FALSE	Has_Input
[20]	Coal-CH3OH technical pathway	Methanol	Methanol synthesis and purification	Steam	Input	5547.04	MJ	FALSE	Has_Input
[20]	Coal-CH3OH technical pathway	Methanol	Methanol synthesis and purification	Desalting water	Input	4790.38	kg	FALSE	Has_Input
[20]	Coal-CH3OH technical pathway	Methanol	Methanol synthesis and purification	Recycling water	Input	194295	kg	FALSE	Has_Input
[20]	Coal-CH3OH technical pathway	Methanol	Methanol synthesis and purification	Aluminium oxide	Input	0.24	kg	FALSE	Has_Input
[20]	Coal-CH3OH technical pathway	Methanol	Methanol synthesis and purification	Copper oxide	Input	0.09	kg	FALSE	Has_Input
[20]	Coal-CH3OH technical pathway	Methanol	Methanol synthesis and purification	Zinc	Input	0.03	kg	FALSE	Has_Input
[20]	Coal-CH3OH technical pathway	Methanol	Methanol synthesis and purification	Methanol factory	Input	3.72e-08	Unit	FALSE	Has_Input
[20]	Coal-CH3OH technical pathway	Methanol	Methanol synthesis and purification	Synthetic gas	Input	1195	kg	FALSE	Has_Input
[20]	Coal-CH3OH technical pathway	Methanol	Methanol synthesis and purification	Methanol	Output	1000	kg	TRUE	Has_Output
[20]	Coal-CH3OH technical pathway	Methanol	Methanol synthesis and purification	CO2	Output	3.8	kg	FALSE	Has_Output
[20]	Coal-CH3OH technical pathway	Methanol	Methanol synthesis and purification	Carbon monoxide	Output	0.58	kg	FALSE	Has_Output
[20]	Coal-CH3OH technical pathway	Methanol	Methanol synthesis and purification	VOC	Output	6.85	kg	FALSE	Has_Output
[20]	NG-CH3OH technical pathway	Methanol	Methanol synthesis and purification	Electricity	Input	74	kWh	FALSE	Has_Input
[20]	NG-CH3OH technical pathway	Methanol	Methanol synthesis and purification	Steam	Input	6930	MJ	FALSE	Has_Input
[20]	NG-CH3OH technical pathway	Methanol	Methanol synthesis and purification	Desalting water	Input	850	kg	FALSE	Has_Input
[20]	NG-CH3OH technical pathway	Methanol	Methanol synthesis and purification	Molybdenum	Input	0.01	kg	FALSE	Has_Input
[20]	NG-CH3OH technical pathway	Methanol	Methanol synthesis and purification	Aluminium oxide	Input	0.24	kg	FALSE	Has_Input
[20]	NG-CH3OH technical pathway	Methanol	Methanol synthesis and purification	Copper oxide	Input	0.09	kg	FALSE	Has_Input
[20]	NG-CH3OH technical pathway	Methanol	Methanol synthesis and purification	Nickel	Input	0.02	kg	FALSE	Has_Input
[20]	NG-CH3OH technical pathway	Methanol	Methanol synthesis and purification	Zinc	Input	0.03	kg	FALSE	Has_Input
[20]	NG-CH3OH technical pathway	Methanol	Methanol synthesis and purification	Methanol factory	Input	3.72e-08	Unit	FALSE	Has_Input
[20]	NG-CH3OH technical pathway	Methanol	Methanol synthesis and purification	Natural gas	Input	651.79	Nm^3	FALSE	Has_Input
[20]	NG-CH3OH technical pathway	Methanol	Methanol synthesis and purification	Methanol	Output	1000	kg	TRUE	Has_Output
[20]	NG-CH3OH technical pathway	Methanol	Methanol synthesis and purification	Methane	Output	0.98	kg	FALSE	Has_Output
[20]	NG-CH3OH technical pathway	Methanol	Methanol synthesis and purification	Nitrogen oxides	Output	0.15	kg	FALSE	Has_Output
[20]	NG-CH3OH technical pathway	Methanol	Methanol synthesis and purification	Sulphur oxides	Output	0.0138	kg	FALSE	Has_Output
[20]	NG-CH3OH technical pathway	Methanol	Methanol synthesis and purification	Water	Output	3.3363	Nm^3	FALSE	Has_Output
[20]	PV/CCU-CH3OH technical pathway	Methanol	Methanol synthesis and purification	Electricity	Input	42.75	kWh	FALSE	Has_Input
[20]	PV/CCU-CH3OH technical pathway	Methanol	Methanol synthesis and purification	Hydrogen	Input	190	MJ	FALSE	Has_Input
[20]	PV/CCU-CH3OH technical pathway	Methanol	Methanol synthesis and purification	Carbon dioxide (HP)	Input	1455	kg	FALSE	Has_Input
[20]	PV/CCU-CH3OH technical pathway	Methanol	Methanol synthesis and purification	Aluminium oxide	Input	0.012	kg	FALSE	Has_Input
[20]	PV/CCU-CH3OH technical pathway	Methanol	Methanol synthesis and purification	Copper oxide	Input	0.062	kg	FALSE	Has_Input
[20]	PV/CCU-CH3OH technical pathway	Methanol	Methanol synthesis and purification	Zinc oxide	Input	0.029	kg	FALSE	Has_Input
[20]	PV/CCU-CH3OH technical pathway	Methanol	Methanol synthesis and purification	Methanol factory	Input	3.72e-08	Unit	FALSE	Has_Input
[20]	PV/CCU-CH3OH technical pathway	Methanol	Methanol synthesis and purification	Methanol	Output	1000	kg	TRUE	Has_Output
[20]	PV/CCU-CH3OH technical pathway	Methanol	Methanol synthesis and purification	Waste water	Output	630	kg	FALSE	Has_Output
[21]	Solid Recovered Fuel and Lignite to methanol pathway (case1)	Methanol	Methanol production	Syngas	Input	3.3009	kg	FALSE	Has_Input
[21]	Solid Recovered Fuel and Lignite to methanol pathway (case1)	Methanol	Methanol production	Electricity	Input	0.3151	MJ	FALSE	Has_Input
[21]	Solid Recovered Fuel and Lignite to methanol pathway (case1)	Methanol	Methanol production	Methane	Output	0.1647	kg	FALSE	Has_Output
[21]	Solid Recovered Fuel and Lignite to methanol pathway (case1)	Methanol	Methanol production	Carbon monoxide	Output	0.126	kg	FALSE	Has_Output
[21]	Solid Recovered Fuel and Lignite to methanol pathway (case1)	Methanol	Methanol production	Carbon dioxide	Output	0.0031	kg	FALSE	Has_Output
[21]	Solid Recovered Fuel and Lignite to methanol pathway (case1)	Methanol	Methanol production	Hydrogen	Output	0.0168	kg	FALSE	Has_Output
[21]	Solid Recovered Fuel and Lignite to methanol pathway (case1)	Methanol	Methanol production	Hydrogen sulphide	Output	0.0001	kg	FALSE	Has_Output
[21]	Solid Recovered Fuel and Lignite to methanol pathway (case1)	Methanol	Methanol production	Methanol	Output	1	kg	TRUE	Has_Output
[21]	Solid Recovered Fuel and Lignite to methanol pathway (case1)	Methanol	Methanol production	Nitrogen dioxide	Output	1e-05	kg	FALSE	Has_Output
[21]	Solid Recovered Fuel and Lignite to methanol pathway (case2)	Methanol	Methanol production	Syngas	Input	3.2317	kg	FALSE	Has_Input
[21]	Solid Recovered Fuel and Lignite to methanol pathway (case2)	Methanol	Methanol production	Electricity	Input	0.2958	MJ	FALSE	Has_Input
[21]	Solid Recovered Fuel and Lignite to methanol pathway (case2)	Methanol	Methanol production	Methane	Output	0.1632	kg	FALSE	Has_Output
[21]	Solid Recovered Fuel and Lignite to methanol pathway (case2)	Methanol	Methanol production	Carbon monoxide	Output	0.134	kg	FALSE	Has_Output
[21]	Solid Recovered Fuel and Lignite to methanol pathway (case2)	Methanol	Methanol production	Carbon dioxide	Output	0.0029	kg	FALSE	Has_Output
[21]	Solid Recovered Fuel and Lignite to methanol pathway (case2)	Methanol	Methanol production	Hydrogen	Output	0.0177	kg	FALSE	Has_Output
[21]	Solid Recovered Fuel and Lignite to methanol pathway (case2)	Methanol	Methanol production	Hydrogen sulphide	Output	5e-05	kg	FALSE	Has_Output
[21]	Solid Recovered Fuel and Lignite to methanol pathway (case2)	Methanol	Methanol production	Methanol	Output	0.0005	kg	FALSE	Has_Output
[21]	Solid Recovered Fuel and Lignite to methanol pathway (case2)	Methanol	Methanol production	Nitrogen dioxide	Output	5e-06	kg	FALSE	Has_Output
[21]	Solid Recovered Fuel and Lignite to methanol pathway (case2)	Methanol	Methanol production	Methanol	Output	1	kg	TRUE	Has_Output
[21]	Solid Recovered Fuel and Lignite to methanol pathway (case3)	Methanol	Methanol production	Electricity	Input	0.2683	MJ	FALSE	Has_Input
[21]	Solid Recovered Fuel and Lignite to methanol pathway (case3)	Methanol	Methanol production	Syngas	Input	3.0608	kg	FALSE	Has_Input
[21]	Solid Recovered Fuel and Lignite to methanol pathway (case3)	Methanol	Methanol production	Methane	Output	0.1585	kg	FALSE	Has_Output
[21]	Solid Recovered Fuel and Lignite to methanol pathway (case3)	Methanol	Methanol production	Carbon monoxide	Output	0.135	kg	FALSE	Has_Output
[21]	Solid Recovered Fuel and Lignite to methanol pathway (case3)	Methanol	Methanol production	CO2	Output	0.0026	kg	FALSE	Has_Output
[21]	Solid Recovered Fuel and Lignite to methanol pathway (case3)	Methanol	Methanol production	Hydrogen	Output	0.0178	kg	FALSE	Has_Output
[21]	Solid Recovered Fuel and Lignite to methanol pathway (case3)	Methanol	Methanol production	Hydrogen sulphide	Output	4e-05	kg	FALSE	Has_Output
[21]	Solid Recovered Fuel and Lignite to methanol pathway (case3)	Methanol	Methanol production	Methanol	Output	0.0004	kg	FALSE	Has_Output
[21]	Solid Recovered Fuel and Lignite to methanol pathway (case3)	Methanol	Methanol production	Nitrogen dioxide	Output	4e-06	kg	FALSE	Has_Output
[21]	Solid Recovered Fuel and Lignite to methanol pathway (case3)	Methanol	Methanol production	Methane	Output	0.1585	kg	FALSE	Has_Output
[21]	Solid Recovered Fuel and Lignite to methanol pathway (case3)	Methanol	Methanol production	Methanol	Output	1	kg	TRUE	Has_Output
[21]	Natural gas to methanol pathway	Methanol	Methanol production	Clean gas	Input	1.2116	kg	FALSE	Has_Input
[21]	Natural gas to methanol pathway	Methanol	Methanol production	Electricity	Input	0.447	MJ	FALSE	Has_Input
[21]	Natural gas to methanol pathway	Methanol	Methanol production	Carbon monoxide	Output	0.1224	kg	FALSE	Has_Output
[21]	Natural gas to methanol pathway	Methanol	Methanol production	Carbon dioxide	Output	0.0052	kg	FALSE	Has_Output
[21]	Natural gas to methanol pathway	Methanol	Methanol production	Hydrogen	Output	0.0791	kg	FALSE	Has_Output
[21]	Natural gas to methanol pathway	Methanol	Methanol production	Methanol	Output	0.0004	kg	FALSE	Has_Output
[21]	Natural gas to methanol pathway	Methanol	Methanol production	Nitrogen	Output	0.0042	kg	FALSE	Has_Output
[21]	Natural gas to methanol pathway	Methanol	Methanol production	Methanol	Output	1	kg	TRUE	Has_Output
[22]	Photocatalytic pathway	Methanol	Methanol production	NaOH	Input	10.494	kg	FALSE	Has_Input
[22]	Photocatalytic pathway	Methanol	Methanol production	Water	Input	262.35	L	FALSE	Has_Input
[22]	Photocatalytic pathway	Methanol	Methanol production	Activated carbon	Input	0.792	kg	FALSE	Has_Input
[22]	Photocatalytic pathway	Methanol	Methanol production	Electricity	Input	62.291	kWh	FALSE	Has_Input
[22]	Photocatalytic pathway	Methanol	Methanol production	Methanol	Output	1	kg	TRUE	Has_Output
[22]	Photocatalytic pathway	Methanol	Methanol production	Purged amine	Output	0.038	kg	FALSE	Has_Output
[22]	Photocatalytic pathway	Methanol	Methanol production	Treated gas	Output	12.366	kg	FALSE	Has_Output
[22]	Photocatalytic pathway	Methanol	Methanol production	Solid waste	Output	1.999	kg	FALSE	Has_Output
[22]	Photocatalytic pathway	Methanol	Methanol production	Spent catalyst	Output	1.59	kg	FALSE	Has_Output
[22]	Photocatalytic pathway	Methanol	Methanol production	Wastewater	Output	262.225	kg	FALSE	Has_Output
[22]	Photocatalytic pathway	Methanol	Methanol production	O2	Output	1.498	kg	FALSE	Has_Output
[22]	Photocatalytic pathway	Methanol	Methanol production	CO2	Output	0.055	kg	FALSE	Has_Output
[22]	Conventional pathway (steam methane reforming)	Methanol	Methanol production	Steam	Input	46.683	kg	FALSE	Has_Input
[22]	Conventional pathway (steam methane reforming)	Methanol	Methanol production	Ni-based catalyst	Input	3.014	kg	FALSE	Has_Input
[22]	Conventional pathway (steam methane reforming)	Methanol	Methanol production	Al2O3-based catalyst	Input	1.167	kg	FALSE	Has_Input
[22]	Conventional pathway (steam methane reforming)	Methanol	Methanol production	Electricity	Input	104.305	kWh	FALSE	Has_Input
[22]	Conventional pathway (steam methane reforming)	Methanol	Methanol production	Methanol	Output	1	kg	TRUE	Has_Output
[22]	Conventional pathway (steam methane reforming)	Methanol	Methanol production	Purged amine	Output	0.171	kg	FALSE	Has_Output
[22]	Conventional pathway (steam methane reforming)	Methanol	Methanol production	Spent catalyst	Output	4.181	kg	FALSE	Has_Output
[22]	Conventional pathway (steam methane reforming)	Methanol	Methanol production	Wastewater	Output	40.687	kg	FALSE	Has_Output
[22]	Conventional pathway (steam methane reforming)	Methanol	Methanol production	CO2	Output	0.109	kg	FALSE	Has_Output
[22]	Conventional pathway (steam methane reforming)	Methanol	Methanol production	CO	Output	8.316	kg	FALSE	Has_Output
[22]	Conventional pathway (steam methane reforming)	Methanol	Methanol production	CH4	Output	7.696	kg	FALSE	Has_Output
[22]	Conventional pathway (steam methane reforming)	Methanol	Methanol production	H2	Output	1.864	kg	FALSE	Has_Output
[22]	Conventional pathway (steam methane reforming)	Methanol	Methanol production	acidic gas (CO2 + H2S)	Output	1.925	kg	FALSE	Has_Output
[23]	Coal-to-methanol pathway	Methanol	Methanol production	Coal	Input	2.93	t	FALSE	Has_Input
[23]	Coal-to-methanol pathway	Methanol	Methanol production	Steam	Input	3.2	GJ	FALSE	Has_Input
[23]	Coal-to-methanol pathway	Methanol	Methanol production	Electricity	Input	0.61	MWh	FALSE	Has_Input
[23]	Coal-to-methanol pathway	Methanol	Methanol production	Methanol	Output	1	t	TRUE	Has_Output
[23]	Coal-to-methanol pathway	Methanol	Methanol production	LNG	Output	0.33	t	FALSE	Has_Output
[24]	Sugarcane bagasse-based pathway	Methanol	Syngas conditioning and methanol synthesis	Electricity	Input	0.093	kWh	FALSE	Has_Input
[24]	Sugarcane bagasse-based pathway	Methanol	Syngas conditioning and methanol synthesis	Steam (conditions: 165 Â°C and 0.68 MPa)	Input	1.73	kg	FALSE	Has_Input
[24]	Sugarcane bagasse-based pathway	Methanol	Syngas conditioning and methanol synthesis	Syngas	Input	4.2	kg	FALSE	Has_Input
[24]	Sugarcane bagasse-based pathway	Methanol	Syngas conditioning and methanol synthesis	Methanol	Output	1	kg	TRUE	Has_Output
[24]	Sugarcane bagasse-based pathway	Methanol	Syngas conditioning and methanol synthesis	Residual gas	Output	90	g	FALSE	Has_Output
[24]	Sugarcane bagasse-based pathway	Methanol	Syngas conditioning and methanol synthesis	CO	Output	1.12	g	FALSE	Has_Output
[24]	Sugarcane bagasse-based pathway	Methanol	Syngas conditioning and methanol synthesis	CH3OH (VOC)	Output	0.0649	g	FALSE	Has_Output
[24]	Sugarcane bagasse-based pathway	Methanol	Syngas conditioning and methanol synthesis	Others VOC	Output	0.0248	g	FALSE	Has_Output
[24]	Sugarcane bagasse-based pathway	Methanol	Syngas conditioning and methanol synthesis	CH4	Output	0.234	g	FALSE	Has_Output
[24]	Sugarcane bagasse-based pathway	Methanol	Syngas conditioning and methanol synthesis	CO2	Output	1830	g	FALSE	Has_Output
[24]	Sugarcane bagasse-based pathway	Methanol	Syngas conditioning and methanol synthesis	NOx	Output	0.928	g	FALSE	Has_Output
[24]	Sugarcane bagasse-based pathway	Methanol	Syngas conditioning and methanol synthesis	PM10	Output	0.93	g	FALSE	Has_Output
[24]	Sugarcane bagasse-based pathway	Methanol	Syngas conditioning and methanol synthesis	SO2	Output	0.524	g	FALSE	Has_Output
[24]	Sugarcane bagasse-based pathway	Methanol	Syngas conditioning and methanol synthesis	Slag	Output	410	g	FALSE	Has_Output
[28]	CO2 electrochemical reduction pathway (Normalized)	Formic acid	Formic acid production	Nafion membrane	Input	0.0558	g	FALSE	Has_Input
[28]	CO2 electrochemical reduction pathway (Normalized)	Formic acid	Formic acid production	CO2 flow	Input	13812	g	FALSE	Has_Input
[28]	CO2 electrochemical reduction pathway (Normalized)	Formic acid	Formic acid production	Electrolyte (sodium bicarbonate)	Input	1.143	g	FALSE	Has_Input
[28]	CO2 electrochemical reduction pathway (Normalized)	Formic acid	Formic acid production	Water	Input	61347	g	FALSE	Has_Input
[28]	CO2 electrochemical reduction pathway (Normalized)	Formic acid	Formic acid production	Electricity	Input	5.316	kWh	FALSE	Has_Input
[28]	CO2 electrochemical reduction pathway (Normalized)	Formic acid	Formic acid production	Formic acid	Output	1	kg	TRUE	Has_Output
[29]	Electrochemical (CO2-to-FA) based pathway	Formic acid	Formic acid production	CO2	Input	0.96	kg	FALSE	Has_Input
[29]	Electrochemical (CO2-to-FA) based pathway	Formic acid	Formic acid production	H2O	Input	0.57	kg	FALSE	Has_Input
[29]	Electrochemical (CO2-to-FA) based pathway	Formic acid	Formic acid production	Electricity	Input	4.79	kWh	FALSE	Has_Input
[29]	Electrochemical (CO2-to-FA) based pathway	Formic acid	Formic acid production	Steam	Input	6.05	kWh	FALSE	Has_Input
[29]	Electrochemical (CO2-to-FA) based pathway	Formic acid	Formic acid production	Cooling	Input	5.44	kWh	FALSE	Has_Input
[29]	Electrochemical (CO2-to-FA) based pathway	Formic acid	Formic acid production	CO2	Output	0.18	kg	FALSE	Has_Output
[29]	Electrochemical (CO2-to-FA) based pathway	Formic acid	Formic acid production	H2O	Output	0.18	kg	FALSE	Has_Output
[29]	Electrochemical (CO2-to-FA) based pathway	Formic acid	Formic acid production	Formic acid	Output	1	kg	TRUE	Has_Output
[29]	Electrochemical (CO2-to-FA) based pathway	Formic acid	Formic acid production	O2	Output	0.35	kg	FALSE	Has_Output
[29]	Conventional (CO-to-FA) based pathway	Formic acid	Formic acid production	CO	Input	0.61	kg	FALSE	Has_Input
[29]	Conventional (CO-to-FA) based pathway	Formic acid	Formic acid production	Electricity	Input	0.13	kWh	FALSE	Has_Input
[29]	Conventional (CO-to-FA) based pathway	Formic acid	Formic acid production	Steam	Input	5.35	kWh	FALSE	Has_Input
[29]	Conventional (CO-to-FA) based pathway	Formic acid	Formic acid production	CO2	Output	0.01	kg	FALSE	Has_Output
[29]	Conventional (CO-to-FA) based pathway	Formic acid	Formic acid production	Formic acid	Output	1	kg	TRUE	Has_Output
[30]	CO2 electrochemical reduction pathway (lab-scale)	Formic acid	Formic acid production	Total electricity	Input	1050.7	kWh	FALSE	Has_Input
[30]	CO2 electrochemical reduction pathway (lab-scale)	Formic acid	Formic acid production	Total heat	Input	10.402	MWh	FALSE	Has_Input
[30]	CO2 electrochemical reduction pathway (lab-scale)	Formic acid	Formic acid production	Cooling water	Input	517.1	m^3	FALSE	Has_Input
[30]	CO2 electrochemical reduction pathway (lab-scale)	Formic acid	Formic acid production	CO2	Input	9358.3	kg	FALSE	Has_Input
[30]	CO2 electrochemical reduction pathway (lab-scale)	Formic acid	Formic acid production	H2O	Input	163.8	kg	FALSE	Has_Input
[30]	CO2 electrochemical reduction pathway (lab-scale)	Formic acid	Formic acid production	ACN	Input	4429.7	kg	FALSE	Has_Input
[30]	CO2 electrochemical reduction pathway (lab-scale)	Formic acid	Formic acid production	TBABF4	Input	110.8	kg	FALSE	Has_Input
[30]	CO2 electrochemical reduction pathway (lab-scale)	Formic acid	Formic acid production	Chemical factory	Input	2.4e-09	items	FALSE	Has_Input
[30]	CO2 electrochemical reduction pathway (lab-scale)	Formic acid	Formic acid production	Copper electrode	Input	0.0055	kg	FALSE	Has_Input
[30]	CO2 electrochemical reduction pathway (lab-scale)	Formic acid	Formic acid production	Formic acid	Output	1	kg	TRUE	Has_Output
[30]	CO2 electrochemical reduction pathway (lab-scale)	Formic acid	Formic acid production	CO2 emissions	Output	9357.4	kg	FALSE	Has_Output
[30]	CO2 electrochemical reduction pathway (lab-scale)	Formic acid	Formic acid production	CO emissions	Output	0.0035	kg	FALSE	Has_Output
[30]	CO2 electrochemical reduction pathway (lab-scale)	Formic acid	Formic acid production	Water, waste	Output	163.3	m^3	FALSE	Has_Output
[30]	CO2 electrochemical reduction pathway (best case)	Formic acid	Formic acid production	Total electricity	Input	3.1	kWh	FALSE	Has_Input
[30]	CO2 electrochemical reduction pathway (best case)	Formic acid	Formic acid production	Total heat	Input	0.1	MWh	FALSE	Has_Input
[30]	CO2 electrochemical reduction pathway (best case)	Formic acid	Formic acid production	Cooling water	Input	0.0004	m^3	FALSE	Has_Input
[30]	CO2 electrochemical reduction pathway (best case)	Formic acid	Formic acid production	CO2	Input	0.8	kg	FALSE	Has_Input
[30]	CO2 electrochemical reduction pathway (best case)	Formic acid	Formic acid production	H2O	Input	0.5	kg	FALSE	Has_Input
[30]	CO2 electrochemical reduction pathway (best case)	Formic acid	Formic acid production	Chemical factory	Input	5e-10	items	FALSE	Has_Input
[30]	CO2 electrochemical reduction pathway (best case)	Formic acid	Formic acid production	Nafion membrane	Input	1.1e-07	kg	FALSE	Has_Input
[30]	CO2 electrochemical reduction pathway (best case)	Formic acid	Formic acid production	Copper electrode	Input	8.2e-11	kg	FALSE	Has_Input
[30]	CO2 electrochemical reduction pathway (best case)	Formic acid	Formic acid production	Formic acid	Output	1	kg	TRUE	Has_Output
[30]	CO2 electrochemical reduction pathway (best case)	Formic acid	Formic acid production	O2 (byproduct)	Output	0.3	kg	FALSE	Has_Output
[30]	CO2 electrochemical reduction pathway (best case)	Formic acid	Formic acid production	CO2 emissions	Output	8.2e-05	kg	FALSE	Has_Output
[30]	CO2 electrochemical reduction pathway (best case)	Formic acid	Formic acid production	Water, waste	Output	0.00067	m^3	FALSE	Has_Output
[31]	Carbon capture and utilization (CCU) pathway	Formic acid	Formic acid production	H2	Input	0.045	kg	FALSE	Has_Input
[31]	Carbon capture and utilization (CCU) pathway	Formic acid	Formic acid production	CO2 use	Input	0.978	kg	FALSE	Has_Input
[31]	Carbon capture and utilization (CCU) pathway	Formic acid	Formic acid production	CO use	Input	0.207	kg	FALSE	Has_Input
[31]	Carbon capture and utilization (CCU) pathway	Formic acid	Formic acid production	Electricity	Input	0.21	kWh	FALSE	Has_Input
[31]	Carbon capture and utilization (CCU) pathway	Formic acid	Formic acid production	Heat	Input	1.04	kWh	FALSE	Has_Input
[31]	Carbon capture and utilization (CCU) pathway	Formic acid	Formic acid production	CO2 emission	Output	0.021	kg	FALSE	Has_Output
[31]	Carbon capture and utilization (CCU) pathway	Formic acid	Formic acid production	Formic acid	Output	1	kg	TRUE	Has_Output
[31]	Conventional fossil-based pathway	Formic acid	Formic acid production	CO use	Input	0.614	kg	FALSE	Has_Input
[31]	Conventional fossil-based pathway	Formic acid	Formic acid production	Electricity	Input	0.13	kWh	FALSE	Has_Input
[31]	Conventional fossil-based pathway	Formic acid	Formic acid production	Heat	Input	5.35	kWh	FALSE	Has_Input
[31]	Conventional fossil-based pathway	Formic acid	Formic acid production	CO2 emission	Output	0.01	kg	FALSE	Has_Output
[31]	Conventional fossil-based pathway	Formic acid	Formic acid production	Formic acid	Output	1	kg	TRUE	Has_Output
[32]	Direct ethanol dehydration	Ethylene	Ethylene production	Poplar wood (wet)	Input	15847	kg	FALSE	Has_Input
[32]	Direct ethanol dehydration	Ethylene	Ethylene production	Alumina	Input	0.2	kg	FALSE	Has_Input
[32]	Direct ethanol dehydration	Ethylene	Ethylene production	Co	Input	0.11	kg	FALSE	Has_Input
[32]	Direct ethanol dehydration	Ethylene	Ethylene production	Nickel	Input	0.02	kg	FALSE	Has_Input
[32]	Direct ethanol dehydration	Ethylene	Ethylene production	S2Mo	Input	0.52	kg	FALSE	Has_Input
[32]	Direct ethanol dehydration	Ethylene	Ethylene production	ZnO	Input	0.54	kg	FALSE	Has_Input
[32]	Direct ethanol dehydration	Ethylene	Ethylene production	Zeolite	Input	0.24	kg	FALSE	Has_Input
[32]	Direct ethanol dehydration	Ethylene	Ethylene production	DEPG	Input	2.37	kg	FALSE	Has_Input
[32]	Direct ethanol dehydration	Ethylene	Ethylene production	KOH	Input	0.02	kg	FALSE	Has_Input
[32]	Direct ethanol dehydration	Ethylene	Ethylene production	Oxygen	Input	8511	kg	FALSE	Has_Input
[32]	Direct ethanol dehydration	Ethylene	Ethylene production	Water Power generation	Input	1900	kg	FALSE	Has_Input
[32]	Direct ethanol dehydration	Ethylene	Ethylene production	Process Water	Input	2365	kg	FALSE	Has_Input
[32]	Direct ethanol dehydration	Ethylene	Ethylene production	Electricity	Input	1.7	MWh	FALSE	Has_Input
[32]	Direct ethanol dehydration	Ethylene	Ethylene production	Natural gas	Input	84	Nm^3	FALSE	Has_Input
[32]	Direct ethanol dehydration	Ethylene	Ethylene production	CO biogenic	Output	352	kg	FALSE	Has_Output
[32]	Direct ethanol dehydration	Ethylene	Ethylene production	CO fossil	Output	0.06	kg	FALSE	Has_Output
[32]	Direct ethanol dehydration	Ethylene	Ethylene production	CO2 biogenic	Output	14813	kg	FALSE	Has_Output
[32]	Direct ethanol dehydration	Ethylene	Ethylene production	CO2 fossil	Output	179	kg	FALSE	Has_Output
[32]	Direct ethanol dehydration	Ethylene	Ethylene production	SO2	Output	0.58	kg	FALSE	Has_Output
[32]	Direct ethanol dehydration	Ethylene	Ethylene production	SO3	Output	0.01	kg	FALSE	Has_Output
[32]	Direct ethanol dehydration	Ethylene	Ethylene production	Solid waste to landfill Biomass (chippings)	Output	396	kg	FALSE	Has_Output
[32]	Direct ethanol dehydration	Ethylene	Ethylene production	Ash	Output	100	kg	FALSE	Has_Output
[32]	Direct ethanol dehydration	Ethylene	Ethylene production	Spent catalysts	Output	4.2	kg	FALSE	Has_Output
[32]	Direct ethanol dehydration	Ethylene	Ethylene production	Spent bed materials	Output	0.24	kg	FALSE	Has_Output
[32]	Direct ethanol dehydration	Ethylene	Ethylene production	Wastewater to treatment	Output	12373	kg	FALSE	Has_Output
[32]	Direct ethanol dehydration	Ethylene	Ethylene production	Methanol	Output	469	kg	FALSE	Has_Output
[32]	Direct ethanol dehydration	Ethylene	Ethylene production	Propanol	Output	182	kg	FALSE	Has_Output
[32]	Direct ethanol dehydration	Ethylene	Ethylene production	Sulphur cake	Output	3.59	kg	FALSE	Has_Output
[32]	Direct ethanol dehydration	Ethylene	Ethylene production	Ethylene	Output	65966	t	TRUE	Has_Output
[32]	Indirect ethanol dehydration	Ethylene	Ethylene production	Poplar wood (wet)	Input	8636	kg	FALSE	Has_Input
[32]	Indirect ethanol dehydration	Ethylene	Ethylene production	Alumina	Input	0.35	kg	FALSE	Has_Input
[32]	Indirect ethanol dehydration	Ethylene	Ethylene production	Co	Input	0.07	kg	FALSE	Has_Input
[32]	Indirect ethanol dehydration	Ethylene	Ethylene production	Cu/ZnO	Input	0.03	kg	FALSE	Has_Input
[32]	Indirect ethanol dehydration	Ethylene	Ethylene production	H-Mordenite	Input	0.2	kg	FALSE	Has_Input
[32]	Indirect ethanol dehydration	Ethylene	Ethylene production	Nickel	Input	0.03	kg	FALSE	Has_Input
[32]	Indirect ethanol dehydration	Ethylene	Ethylene production	ZnO	Input	0.7	kg	FALSE	Has_Input
[32]	Indirect ethanol dehydration	Ethylene	Ethylene production	Sand	Input	10.95	kg	FALSE	Has_Input
[32]	Indirect ethanol dehydration	Ethylene	Ethylene production	Zeolite	Input	0.07	kg	FALSE	Has_Input
[32]	Indirect ethanol dehydration	Ethylene	Ethylene production	Monoethanolamine	Input	3.74	kg	FALSE	Has_Input
[32]	Indirect ethanol dehydration	Ethylene	Ethylene production	Diesel	Input	35.82	kg	FALSE	Has_Input
[32]	Indirect ethanol dehydration	Ethylene	Ethylene production	KOH	Input	0.02	kg	FALSE	Has_Input
[32]	Indirect ethanol dehydration	Ethylene	Ethylene production	NaOH	Input	0.03	kg	FALSE	Has_Input
[32]	Indirect ethanol dehydration	Ethylene	Ethylene production	Water Power generation	Input	10017	kg	FALSE	Has_Input
[32]	Indirect ethanol dehydration	Ethylene	Ethylene production	Process Water	Input	31458	kg	FALSE	Has_Input
[32]	Indirect ethanol dehydration	Ethylene	Ethylene production	Electricity	Input	0.39	MWh	FALSE	Has_Input
[32]	Indirect ethanol dehydration	Ethylene	Ethylene production	Natural gas	Input	84	Nm^3	FALSE	Has_Input
[32]	Indirect ethanol dehydration	Ethylene	Ethylene production	CO biogenic	Output	0	kg	FALSE	Has_Output
[32]	Indirect ethanol dehydration	Ethylene	Ethylene production	CO fossil	Output	0.06	kg	FALSE	Has_Output
[32]	Indirect ethanol dehydration	Ethylene	Ethylene production	CO2 biogenic	Output	292	kg	FALSE	Has_Output
[32]	Indirect ethanol dehydration	Ethylene	Ethylene production	CO2 fossil	Output	9452	kg	FALSE	Has_Output
[32]	Indirect ethanol dehydration	Ethylene	Ethylene production	Solid waste to landfill Biomass (chippings)	Output	216	kg	FALSE	Has_Output
[32]	Indirect ethanol dehydration	Ethylene	Ethylene production	Ash	Output	65	kg	FALSE	Has_Output
[32]	Indirect ethanol dehydration	Ethylene	Ethylene production	Spent catalysts	Output	1.42	kg	FALSE	Has_Output
[32]	Indirect ethanol dehydration	Ethylene	Ethylene production	Spent bed materials	Output	0.07	kg	FALSE	Has_Output
[32]	Indirect ethanol dehydration	Ethylene	Ethylene production	Wastewater to treatment	Output	28586	kg	FALSE	Has_Output
[32]	Indirect ethanol dehydration	Ethylene	Ethylene production	Sulphur cake	Output	2.45	kg	FALSE	Has_Output
[32]	Indirect ethanol dehydration	Ethylene	Ethylene production	Ethylene	Output	121048	t	TRUE	Has_Output
[32]	Dimethyl ether to olefins	Ethylene	Ethylene production	Poplar wood (wet)	Input	16889	kg	FALSE	Has_Input
[32]	Dimethyl ether to olefins	Ethylene	Ethylene production	Co-Mo	Input	0.12	kg	FALSE	Has_Input
[32]	Dimethyl ether to olefins	Ethylene	Ethylene production	CZA/HZSM-5	Input	8.4	kg	FALSE	Has_Input
[32]	Dimethyl ether to olefins	Ethylene	Ethylene production	Zeolite	Input	4.2	kg	FALSE	Has_Input
[32]	Dimethyl ether to olefins	Ethylene	Ethylene production	Zeolite	Input	0.03	kg	FALSE	Has_Input
[32]	Dimethyl ether to olefins	Ethylene	Ethylene production	DEPG	Input	1.6	kg	FALSE	Has_Input
[32]	Dimethyl ether to olefins	Ethylene	Ethylene production	KOH	Input	0.03	kg	FALSE	Has_Input
[32]	Dimethyl ether to olefins	Ethylene	Ethylene production	Methanol	Input	0.38	kg	FALSE	Has_Input
[32]	Dimethyl ether to olefins	Ethylene	Ethylene production	Oxygen	Input	8423	kg	FALSE	Has_Input
[32]	Dimethyl ether to olefins	Ethylene	Ethylene production	Water (Power generation)	Input	1904	kg	FALSE	Has_Input
[32]	Dimethyl ether to olefins	Ethylene	Ethylene production	Water (Process)	Input	866	kg	FALSE	Has_Input
[32]	Dimethyl ether to olefins	Ethylene	Ethylene production	Electricity	Input	2.1	MWh	FALSE	Has_Input
[32]	Dimethyl ether to olefins	Ethylene	Ethylene production	CO biogenic	Output	137	kg	FALSE	Has_Output
[32]	Dimethyl ether to olefins	Ethylene	Ethylene production	CO2 fossil	Output	14795	kg	FALSE	Has_Output
[32]	Dimethyl ether to olefins	Ethylene	Ethylene production	SO2	Output	0.47	kg	FALSE	Has_Output
[32]	Dimethyl ether to olefins	Ethylene	Ethylene production	Solid waste to landfill (Biomass chippings)	Output	422	kg	FALSE	Has_Output
[32]	Dimethyl ether to olefins	Ethylene	Ethylene production	Ash	Output	106	kg	FALSE	Has_Output
[32]	Dimethyl ether to olefins	Ethylene	Ethylene production	Spent catalysts	Output	14.48	kg	FALSE	Has_Output
[32]	Dimethyl ether to olefins	Ethylene	Ethylene production	Spent bed materials	Output	0.03	kg	FALSE	Has_Output
[32]	Dimethyl ether to olefins	Ethylene	Ethylene production	Wastewater to treatment	Output	12018	kg	FALSE	Has_Output
[32]	Dimethyl ether to olefins	Ethylene	Ethylene production	Liquefied petroleum gas	Output	357	kg	FALSE	Has_Output
[32]	Dimethyl ether to olefins	Ethylene	Ethylene production	Propylene	Output	871	kg	FALSE	Has_Output
[32]	Dimethyl ether to olefins	Ethylene	Ethylene production	Sulphur cake	Output	3.85	kg	FALSE	Has_Output
[32]	Dimethyl ether to olefins	Ethylene	Ethylene production	Ethylene	Output	61896	t	TRUE	Has_Output
[34]	Empty fruit bunch (EFB)-based pathway	Ethylene	Ethylene production	Ethanol	Input	1.77	kg	FALSE	Has_Input
[34]	Empty fruit bunch (EFB)-based pathway	Ethylene	Ethylene production	NaOH	Input	0.57	kg	FALSE	Has_Input
[34]	Empty fruit bunch (EFB)-based pathway	Ethylene	Ethylene production	H2O	Input	0.237	kg	FALSE	Has_Input
[34]	Empty fruit bunch (EFB)-based pathway	Ethylene	Ethylene production	Electricity	Input	0.261	kWh	FALSE	Has_Input
[34]	Empty fruit bunch (EFB)-based pathway	Ethylene	Ethylene production	Heat	Input	3.76	MJ	FALSE	Has_Input
[34]	Empty fruit bunch (EFB)-based pathway	Ethylene	Ethylene production	Catalyst	Input	0.23	kg	FALSE	Has_Input
[34]	Empty fruit bunch (EFB)-based pathway	Ethylene	Ethylene production	Bioethylene	Output	1	kg	TRUE	Has_Output
[34]	Empty fruit bunch (EFB)-based pathway	Ethylene	Ethylene production	H2O	Output	1.35	kg	FALSE	Has_Output
[34]	Empty fruit bunch (EFB)-based pathway	Ethylene	Ethylene production	Ethylene (waste)	Output	0.045	kg	FALSE	Has_Output
[34]	Empty fruit bunch (EFB)-based pathway	Ethylene	Ethylene production	OH[-]	Output	0.036	kg	FALSE	Has_Output
[34]	Empty fruit bunch (EFB)-based pathway	Ethylene	Ethylene production	CO3 2-	Output	0.042	kg	FALSE	Has_Output
[34]	Empty fruit bunch (EFB)-based pathway	Ethylene	Ethylene production	Na[+]	Output	0.082	kg	FALSE	Has_Output
[34]	Empty fruit bunch (EFB)-based pathway	Ethylene	Ethylene production	Butene	Output	0.0053	kg	FALSE	Has_Output
[34]	Empty fruit bunch (EFB)-based pathway	Ethylene	Ethylene production	Acetaldehyde	Output	0.0033	kg	FALSE	Has_Output
[36]	CO2-to-ethylene (cascade conversion)	Ethylene	Ethylene production	CO2 feed	Input	3.14	kg	FALSE	Has_Input
[36]	CO2-to-ethylene (cascade conversion)	Ethylene	Ethylene production	Electrolute	Input	0.002	kg	FALSE	Has_Input
[36]	CO2-to-ethylene (cascade conversion)	Ethylene	Ethylene production	Water makeup	Input	3.9	kg	FALSE	Has_Input
[36]	CO2-to-ethylene (cascade conversion)	Ethylene	Ethylene production	Electricity	Input	163	kg	FALSE	Has_Input
[36]	CO2-to-ethylene (cascade conversion)	Ethylene	Ethylene production	Ethylene	Output	1	kg	TRUE	Has_Output
[36]	CO2-to-ethylene (MEA single-step)	Ethylene	Ethylene production	CO2 feed	Input	3.14	kg	FALSE	Has_Input
[36]	CO2-to-ethylene (MEA single-step)	Ethylene	Ethylene production	Electrolute	Input	0.002	kg	FALSE	Has_Input
[36]	CO2-to-ethylene (MEA single-step)	Ethylene	Ethylene production	Water makeup	Input	3.9	kg	FALSE	Has_Input
[36]	CO2-to-ethylene (MEA single-step)	Ethylene	Ethylene production	Electricity	Input	267	kg	FALSE	Has_Input
[36]	CO2-to-ethylene (MEA single-step)	Ethylene	Ethylene production	Ethylene	Output	1	kg	TRUE	Has_Output
[36]	CO2-to-ethylene (Alkaline single-step)	Ethylene	Ethylene production	CO2 feed	Input	3.14	kg	FALSE	Has_Input
[36]	CO2-to-ethylene (Alkaline single-step)	Ethylene	Ethylene production	Electrolute	Input	0.002	kg	FALSE	Has_Input
[36]	CO2-to-ethylene (Alkaline single-step)	Ethylene	Ethylene production	Water makeup	Input	3.9	kg	FALSE	Has_Input
[36]	CO2-to-ethylene (Alkaline single-step)	Ethylene	Ethylene production	Electricity	Input	455	kg	FALSE	Has_Input
[36]	CO2-to-ethylene (Alkaline single-step)	Ethylene	Ethylene production	Ethylene	Output	1	kg	TRUE	Has_Output
[37]	Shale-gas-based pathway	Ethylene	Ethylene production	Ethane	Input	160	t/h	FALSE	Has_Input
[37]	Shale-gas-based pathway	Ethylene	Ethylene production	NaOH	Input	56.1	kg/h	FALSE	Has_Input
[37]	Shale-gas-based pathway	Ethylene	Ethylene production	Ethylene	Output	125	t/h	TRUE	Has_Output
[37]	Shale-gas-based pathway	Ethylene	Ethylene production	Propylene	Output	1.3	t/h	FALSE	Has_Output
[37]	Shale-gas-based pathway	Ethylene	Ethylene production	Crude C4	Output	12.3	t/h	FALSE	Has_Output
[37]	Shale-gas-based pathway	Ethylene	Ethylene production	Hydrogen	Output	11.9	t/h	FALSE	Has_Output
[37]	Shale-gas-based pathway	Ethylene	Ethylene production	CO2 emissions	Output	117	t/h	FALSE	Has_Output
[37]	Shale-gas-based pathway	Ethylene	Ethylene production	Natural gas	Output	2254.1	MMBTU/h	FALSE	Has_Output
[37]	Shale-gas-based pathway	Ethylene	Ethylene production	Power (on-site)	Output	85.8	MW	FALSE	Has_Output
[37]	Shale-gas-based pathway	Ethylene	Ethylene production	Makeup water	Output	1249.3	t/h	FALSE	Has_Output
[37]	Shale-gas-based pathway	Ethylene	Ethylene production	Cooling water	Output	1367.5	GJ/h	FALSE	Has_Output
[37]	Corn-stover-based pathway	Ethylene	Ethylene production	Ethanol	Input	214	t/h	FALSE	Has_Input
[37]	Corn-stover-based pathway	Ethylene	Ethylene production	NaOH	Input	562.5	kg/h	FALSE	Has_Input
[37]	Corn-stover-based pathway	Ethylene	Ethylene production	Ethylene	Output	125	t/h	TRUE	Has_Output
[37]	Corn-stover-based pathway	Ethylene	Ethylene production	CO2 emissions	Output	37.6	t/h	FALSE	Has_Output
[37]	Corn-stover-based pathway	Ethylene	Ethylene production	Natural gas	Output	693.6	MMBTU/h	FALSE	Has_Output
[37]	Corn-stover-based pathway	Ethylene	Ethylene production	Power	Output	28.8	MW	FALSE	Has_Output
[37]	Corn-stover-based pathway	Ethylene	Ethylene production	Makeup water	Output	407	t/h	FALSE	Has_Output
[37]	Corn-stover-based pathway	Ethylene	Ethylene production	Cooling water	Output	462.2	GJ/h	FALSE	Has_Output
[37]	Corn-grain-based pathway	Ethylene	Ethylene production	Ethanol	Input	214	t/h	FALSE	Has_Input
[37]	Corn-grain-based pathway	Ethylene	Ethylene production	NaOH	Input	562.5	kg/h	FALSE	Has_Input
[37]	Corn-grain-based pathway	Ethylene	Ethylene production	Ethylene	Output	125	kt/h	TRUE	Has_Output
[37]	Corn-grain-based pathway	Ethylene	Ethylene production	CO2 emissions	Output	37.6	t/h	FALSE	Has_Output
[37]	Corn-grain-based pathway	Ethylene	Ethylene production	Natural gas	Output	693.6	MMBTU/h	FALSE	Has_Output
[37]	Corn-grain-based pathway	Ethylene	Ethylene production	Power	Output	28.8	MW	FALSE	Has_Output
[37]	Corn-grain-based pathway	Ethylene	Ethylene production	Makeup water	Output	407	t/h	FALSE	Has_Output
[37]	Corn-grain-based pathway	Ethylene	Ethylene production	Cooling water	Output	462.2	GJ/h	FALSE	Has_Output
[38]	CO2 reduction reaction (RR) pathway (small-scale)	Ethylene	Ethylene production	CO2	Input	4.557	g	FALSE	Has_Input
[38]	CO2 reduction reaction (RR) pathway (small-scale)	Ethylene	Ethylene production	Water	Input	5.877	g	FALSE	Has_Input
[38]	CO2 reduction reaction (RR) pathway (small-scale)	Ethylene	Ethylene production	Energy requirement for electrochemical process	Input	0.0386	kWh	FALSE	Has_Input
[38]	CO2 reduction reaction (RR) pathway (small-scale)	Ethylene	Ethylene production	C2H4 (ethylene)	Output	1	g	TRUE	Has_Output
[38]	CO2 reduction reaction (RR) pathway (small-scale)	Ethylene	Ethylene production	H2 (hydrogen gas)	Output	0.04	g	FALSE	Has_Output
[38]	CO2 reduction reaction (RR) pathway (small-scale)	Ethylene	Ethylene production	CO (carbon monoxide)	Output	0.377	g	FALSE	Has_Output
[38]	CO2 reduction reaction (RR) pathway (small-scale)	Ethylene	Ethylene production	CH4 (methane)	Output	0.006	g	FALSE	Has_Output
[38]	CO2 reduction reaction (RR) pathway (small-scale)	Ethylene	Ethylene production	C2H5OH (ethanol)	Output	0.241	g	FALSE	Has_Output
[38]	CO2 reduction reaction (RR) pathway (small-scale)	Ethylene	Ethylene production	CH3COOH (acetic acid)	Output	0.067	g	FALSE	Has_Output
[38]	CO2 reduction reaction (RR) pathway (small-scale)	Ethylene	Ethylene production	HCOOH (formic acid)	Output	0.165	g	FALSE	Has_Output
[38]	CO2 reduction reaction (RR) pathway (small-scale)	Ethylene	Ethylene production	C3H7OH (1-propanol)	Output	0.042	g	FALSE	Has_Output
[38]	CO2 reduction reaction (RR) pathway (small-scale)	Ethylene	Ethylene production	H2O (wastewater)	Output	3.276	g	FALSE	Has_Output
[38]	CO2 reduction reaction (RR) pathway (small-scale)	Ethylene	Ethylene production	O2	Output	5.22	g	FALSE	Has_Output
[38]	CO2 reduction reaction (RR) pathway (large-scale)	Ethylene	Ethylene production	CO2	Input	4.56	t	FALSE	Has_Input
[38]	CO2 reduction reaction (RR) pathway (large-scale)	Ethylene	Ethylene production	Water	Input	5.88	t	FALSE	Has_Input
[38]	CO2 reduction reaction (RR) pathway (large-scale)	Ethylene	Ethylene production	Energy use	Input	38.6	MWh	FALSE	Has_Input
[38]	CO2 reduction reaction (RR) pathway (large-scale)	Ethylene	Ethylene production	Mixed products from electrochemical process	Input	10.44	t	FALSE	Has_Input
[38]	CO2 reduction reaction (RR) pathway (large-scale)	Ethylene	Ethylene production	C2H4 (ethylene)	Output	1	t	TRUE	Has_Output
[38]	CO2 reduction reaction (RR) pathway (large-scale)	Ethylene	Ethylene production	H2 (hydrogen gas)	Output	0.04	t	FALSE	Has_Output
[38]	CO2 reduction reaction (RR) pathway (large-scale)	Ethylene	Ethylene production	CO (carbon monoxide)	Output	0.377	t	FALSE	Has_Output
[38]	CO2 reduction reaction (RR) pathway (large-scale)	Ethylene	Ethylene production	CH4 (methane)	Output	0.006	t	FALSE	Has_Output
[38]	CO2 reduction reaction (RR) pathway (large-scale)	Ethylene	Ethylene production	Mixed chemicals in aqueous form	Output	0.515	t	FALSE	Has_Output
[38]	CO2 reduction reaction (RR) pathway (large-scale)	Ethylene	Ethylene production	Waste water from side reaction in cathode	Output	3.276	t	FALSE	Has_Output
[38]	CO2 reduction reaction (RR) pathway (large-scale)	Ethylene	Ethylene production	O2	Output	5.22	t	FALSE	Has_Output
[39]	Methanol-to-olefin (MTO) pathway	Ethylene	Ethylene production	Methanol	Input	126.2	GJ	FALSE	Has_Input
[39]	Methanol-to-olefin (MTO) pathway	Ethylene	Ethylene production	Electricity	Input	0.3	GJ	FALSE	Has_Input
[39]	Methanol-to-olefin (MTO) pathway	Ethylene	Ethylene production	Fuel	Input	4.175	GJ	FALSE	Has_Input
[39]	Methanol-to-olefin (MTO) pathway	Ethylene	Ethylene production	Ethylene	Output	1	t	TRUE	Has_Output
[39]	Methanol-to-olefin (MTO) pathway	Ethylene	Ethylene production	Propylene	Output	1.11	t	FALSE	Has_Output
[39]	Methanol-to-olefin (MTO) pathway	Ethylene	Ethylene production	C4 Compounds	Output	0.36	t	FALSE	Has_Output
[39]	Methanol-to-olefin (MTO) pathway	Ethylene	Ethylene production	Fossil CO2	Output	230000	g	FALSE	Has_Output
[39]	Methanol-to-olefin (MTO) pathway	Ethylene	Ethylene production	Biogenic CO2	Output	585000	g	FALSE	Has_Output
[39]	Methanol-to-olefin (MTO) pathway	Ethylene	Ethylene production	NOx	Output	2220	g	FALSE	Has_Output
[39]	Methanol-to-olefin (MTO) pathway	Ethylene	Ethylene production	SO2	Output	29.56	g	FALSE	Has_Output
[39]	Methanol-to-olefin (MTO) pathway	Ethylene	Ethylene production	HC	Output	0.22	g	FALSE	Has_Output
[39]	Methanol-to-olefin (MTO) pathway	Ethylene	Ethylene production	CO	Output	14.78	g	FALSE	Has_Output
[39]	Sugarcane fermentation pathway	Ethylene	Ethylene production	Ethanol (anhydrous)	Input	1.8	t	FALSE	Has_Input
[39]	Sugarcane fermentation pathway	Ethylene	Ethylene production	Electricity	Input	0.2	MWel	FALSE	Has_Input
[39]	Sugarcane fermentation pathway	Ethylene	Ethylene production	Fuel (external)	Input	0.7	MW (HHV)	FALSE	Has_Input
[39]	Sugarcane fermentation pathway	Ethylene	Ethylene production	MP steam	Input	1.1	MW	FALSE	Has_Input
[39]	Sugarcane fermentation pathway	Ethylene	Ethylene production	Ethylene (polymergrade)	Output	1	t	TRUE	Has_Output
[39]	Sugarcane fermentation pathway	Ethylene	Ethylene production	Fossil CO2	Output	406000	g	FALSE	Has_Output
[39]	Sugarcane fermentation pathway	Ethylene	Ethylene production	NOx	Output	1280	g	FALSE	Has_Output
[39]	Sugarcane fermentation pathway	Ethylene	Ethylene production	SO2	Output	17	g	FALSE	Has_Output
[39]	Sugarcane fermentation pathway	Ethylene	Ethylene production	HC	Output	0.1	g	FALSE	Has_Output
[39]	Sugarcane fermentation pathway	Ethylene	Ethylene production	CO	Output	78.7	g	FALSE	Has_Output
[39]	Sugarcane fermentation pathway	Ethylene	Ethylene production	CH4	Output	245.6	g	FALSE	Has_Output
[39]	Sugarcane fermentation pathway	Ethylene	Ethylene production	Biogenic CO2	Output	64400	g	FALSE	Has_Output
[39]	Sugarcane fermentation pathway	Ethylene	Ethylene production	Ethylene	Output	5970	g	FALSE	Has_Output
[39]	Sugarcane fermentation pathway	Ethylene	Ethylene production	Ethan	Output	1.9	g	FALSE	Has_Output
[39]	Wood Fermentation pathway	Ethylene	Ethylene production	Ethanol (pure)	Input	1.7	t	FALSE	Has_Input
[39]	Wood Fermentation pathway	Ethylene	Ethylene production	Electricity	Input	0.2	MWel	FALSE	Has_Input
[39]	Wood Fermentation pathway	Ethylene	Ethylene production	Fuel (external)	Input	0.7	MW (HHV)	FALSE	Has_Input
[39]	Wood Fermentation pathway	Ethylene	Ethylene production	MP steam	Input	1.2	MW	FALSE	Has_Input
[39]	Wood Fermentation pathway	Ethylene	Ethylene production	Ethylene (polymergrade)	Output	1	t	TRUE	Has_Output
[39]	Wood Fermentation pathway	Ethylene	Ethylene production	Fossil CO2	Output	408000	g	FALSE	Has_Output
[39]	Wood Fermentation pathway	Ethylene	Ethylene production	NOx	Output	1280	g	FALSE	Has_Output
[39]	Wood Fermentation pathway	Ethylene	Ethylene production	SO2	Output	17.1	g	FALSE	Has_Output
[39]	Wood Fermentation pathway	Ethylene	Ethylene production	HC	Output	0.1	g	FALSE	Has_Output
[39]	Wood Fermentation pathway	Ethylene	Ethylene production	CO	Output	78.7	g	FALSE	Has_Output
[39]	Wood Fermentation pathway	Ethylene	Ethylene production	CH4	Output	245.6	g	FALSE	Has_Output
[39]	Wood Fermentation pathway	Ethylene	Ethylene production	Biogenic CO2	Output	64400	g	FALSE	Has_Output
[39]	Wood Fermentation pathway	Ethylene	Ethylene production	Ethylene	Output	5970	g	FALSE	Has_Output
[39]	Wood Fermentation pathway	Ethylene	Ethylene production	Ethan	Output	1.9	g	FALSE	Has_Output
[40]	(Liquefied petroleum gas) LPG steam cracking	Ethylene	Ethylene production	LPG	Input	1	t	FALSE	Has_Input
[40]	(Liquefied petroleum gas) LPG steam cracking	Ethylene	Ethylene production	Fuel	Input	11.9	GJ	FALSE	Has_Input
[40]	(Liquefied petroleum gas) LPG steam cracking	Ethylene	Ethylene production	Electricity	Input	0.3	GJ	FALSE	Has_Input
[40]	(Liquefied petroleum gas) LPG steam cracking	Ethylene	Ethylene production	Ethylene	Output	465	kg	TRUE	Has_Output
[40]	(Liquefied petroleum gas) LPG steam cracking	Ethylene	Ethylene production	Propylene	Output	125	kg	FALSE	Has_Output
[40]	(Liquefied petroleum gas) LPG steam cracking	Ethylene	Ethylene production	Butadiene	Output	48	kg	FALSE	Has_Output
[40]	Naphtha steam cracking	Ethylene	Ethylene production	Naphtha	Input	1	t	FALSE	Has_Input
[40]	Naphtha steam cracking	Ethylene	Ethylene production	Fuel	Input	9.4	GJ	FALSE	Has_Input
[40]	Naphtha steam cracking	Ethylene	Ethylene production	Electricity	Input	0.6	GJ	FALSE	Has_Input
[40]	Naphtha steam cracking	Ethylene	Ethylene production	Ethylene	Output	324	kg	TRUE	Has_Output
[40]	Naphtha steam cracking	Ethylene	Ethylene production	Propylene	Output	168	kg	FALSE	Has_Output
[40]	Naphtha steam cracking	Ethylene	Ethylene production	Butadiene	Output	50	kg	FALSE	Has_Output
[40]	Naphtha steam cracking	Ethylene	Ethylene production	BTX	Output	104	kg	FALSE	Has_Output
[40]	Gasoil steam cracking	Ethylene	Ethylene production	Gasoil	Input	1	t	FALSE	Has_Input
[40]	Gasoil steam cracking	Ethylene	Ethylene production	Fuel	Input	10.1	GJ	FALSE	Has_Input
[40]	Gasoil steam cracking	Ethylene	Ethylene production	Electricity	Input	0.2	GJ	FALSE	Has_Input
[40]	Gasoil steam cracking	Ethylene	Ethylene production	Ethylene	Output	250	kg	TRUE	Has_Output
[40]	Gasoil steam cracking	Ethylene	Ethylene production	Propylene	Output	144	kg	FALSE	Has_Output
[40]	Gasoil steam cracking	Ethylene	Ethylene production	Butadiene	Output	50	kg	FALSE	Has_Output
[40]	Gasoil steam cracking	Ethylene	Ethylene production	BTX	Output	124	kg	FALSE	Has_Output
[40]	Ethanol dehydration	Ethylene	Ethylene production	Ethanol	Input	1	t	FALSE	Has_Input
[40]	Ethanol dehydration	Ethylene	Ethylene production	Fuel	Input	0.9	GJ	FALSE	Has_Input
[40]	Ethanol dehydration	Ethylene	Ethylene production	Steam	Input	0.8	GJ	FALSE	Has_Input
[40]	Ethanol dehydration	Ethylene	Ethylene production	Electricity	Input	1.1	GJ	FALSE	Has_Input
[40]	Ethanol dehydration	Ethylene	Ethylene production	Ethylene	Output	570	kg	TRUE	Has_Output
[43]	Fossil fuel-to-EO pathway	Ethylene oxide	Ethylene oxide production	Disposal, solid waste, to sanitary landfill	Input	0.0168	kg	FALSE	Has_Input
[43]	Fossil fuel-to-EO pathway	Ethylene oxide	Ethylene oxide production	Transport, pipeline, NG	Input	1.42e-06	kg.km	FALSE	Has_Input
[43]	Fossil fuel-to-EO pathway	Ethylene oxide	Ethylene oxide production	Transport, pipeline petroleum products	Input	0.000152	kg.km	FALSE	Has_Input
[43]	Fossil fuel-to-EO pathway	Ethylene oxide	Ethylene oxide production	Electricity, at grid	Input	0.22311	kWh	FALSE	Has_Input
[43]	Fossil fuel-to-EO pathway	Ethylene oxide	Ethylene oxide production	Ethylene, at plant	Input	0.788	kg	FALSE	Has_Input
[43]	Fossil fuel-to-EO pathway	Ethylene oxide	Ethylene oxide production	NG, in boiler	Input	0.10101	m^3	FALSE	Has_Input
[43]	Fossil fuel-to-EO pathway	Ethylene oxide	Ethylene oxide production	Oxygen, liquid, at plant	Input	0.88	kg	FALSE	Has_Input
[43]	Fossil fuel-to-EO pathway	Ethylene oxide	Ethylene oxide production	Aldehydes	Output	0.0001	kg	FALSE	Has_Output
[43]	Fossil fuel-to-EO pathway	Ethylene oxide	Ethylene oxide production	Aldehydes	Output	0.00028	kg	FALSE	Has_Output
[43]	Fossil fuel-to-EO pathway	Ethylene oxide	Ethylene oxide production	Ammonia	Output	5e-08	kg	FALSE	Has_Output
[43]	Fossil fuel-to-EO pathway	Ethylene oxide	Ethylene oxide production	BOD5 (Biological Oxygen Demand)	Output	0.00223	kg	FALSE	Has_Output
[43]	Fossil fuel-to-EO pathway	Ethylene oxide	Ethylene oxide production	Carbon dioxide	Output	0.5905	kg	FALSE	Has_Output
[43]	Fossil fuel-to-EO pathway	Ethylene oxide	Ethylene oxide production	Carbon monoxide	Output	3e-07	kg	FALSE	Has_Output
[43]	Fossil fuel-to-EO pathway	Ethylene oxide	Ethylene oxide production	Chromium, ion	Output	2.5e-05	kg	FALSE	Has_Output
[43]	Fossil fuel-to-EO pathway	Ethylene oxide	Ethylene oxide production	COD (Chemical Oxygen Demand)	Output	0.00282	kg	FALSE	Has_Output
[43]	Fossil fuel-to-EO pathway	Ethylene oxide	Ethylene oxide production	Ethylene oxide (air)	Output	9.54e-05	kg	FALSE	Has_Output
[43]	Fossil fuel-to-EO pathway	Ethylene oxide	Ethylene oxide production	Ethylene oxide	Output	1	kg	TRUE	Has_Output
[43]	Fossil fuel-to-EO pathway	Ethylene oxide	Ethylene oxide production	Fluoride	Output	2e-07	kg	FALSE	Has_Output
[43]	Fossil fuel-to-EO pathway	Ethylene oxide	Ethylene oxide production	Methane	Output	0.00305	kg	FALSE	Has_Output
[43]	Fossil fuel-to-EO pathway	Ethylene oxide	Ethylene oxide production	Nitrogen oxides	Output	1.4e-06	kg	FALSE	Has_Output
[43]	Fossil fuel-to-EO pathway	Ethylene oxide	Ethylene oxide production	NMVOC	Output	0.01813	kg	FALSE	Has_Output
[43]	Fossil fuel-to-EO pathway	Ethylene oxide	Ethylene oxide production	Organic substances	Output	0.000682	kg	FALSE	Has_Output
[43]	Fossil fuel-to-EO pathway	Ethylene oxide	Ethylene oxide production	Sulfur oxides	Output	3e-07	kg	FALSE	Has_Output
[43]	Fossil fuel-to-EO pathway	Ethylene oxide	Ethylene oxide production	Zinc	Output	1e-05	kg	FALSE	Has_Output
[44]	CO2-based pathway (2030 scenario)	Ethylene oxide	Ethylene oxide production	CO2	Input	3	kg	FALSE	Has_Input
[44]	CO2-based pathway (2030 scenario)	Ethylene oxide	Ethylene oxide production	CO2 recycling	Input	13.1	kg	FALSE	Has_Input
[44]	CO2-based pathway (2030 scenario)	Ethylene oxide	Ethylene oxide production	H2O	Input	14.1	kg	FALSE	Has_Input
[44]	CO2-based pathway (2030 scenario)	Ethylene oxide	Ethylene oxide production	Stoichiometric demand	Input	10.6	kg	FALSE	Has_Input
[44]	CO2-based pathway (2030 scenario)	Ethylene oxide	Ethylene oxide production	Electricity	Input	0.35	GJ	FALSE	Has_Input
[44]	CO2-based pathway (2030 scenario)	Ethylene oxide	Ethylene oxide production	Steam	Input	0.74	kg	FALSE	Has_Input
[44]	CO2-based pathway (2030 scenario)	Ethylene oxide	Ethylene oxide production	H2O2	Input	6.03	kg	FALSE	Has_Input
[44]	CO2-based pathway (2030 scenario)	Ethylene oxide	Ethylene oxide production	C2H4	Input	0.829	kg	FALSE	Has_Input
[44]	CO2-based pathway (2030 scenario)	Ethylene oxide	Ethylene oxide production	Ethylene oxide	Output	1	kg	TRUE	Has_Output
[44]	CO2-based pathway (2030 scenario)	Ethylene oxide	Ethylene oxide production	H2	Output	0.145	kg	FALSE	Has_Output
[44]	CO2-based pathway (2030 scenario)	Ethylene oxide	Ethylene oxide production	CH4	Output	0.129	kg	FALSE	Has_Output
[44]	CO2-based pathway (2030 scenario)	Ethylene oxide	Ethylene oxide production	H2O2	Output	5.26	kg	FALSE	Has_Output
[44]	CO2-based pathway (2030 scenario)	Ethylene oxide	Ethylene oxide production	C2H4	Output	0.03158	kg	FALSE	Has_Output
[44]	CO2-based pathway (2030 scenario)	Ethylene oxide	Ethylene oxide production	H2	Output	0.00022	kg	FALSE	Has_Output
[44]	CO2-based pathway (2030 scenario)	Ethylene oxide	Ethylene oxide production	CH4	Output	0.00523	kg	FALSE	Has_Output
[44]	CO2-based pathway (2030 scenario)	Ethylene oxide	Ethylene oxide production	CO2	Output	0.02984	kg	FALSE	Has_Output
[44]	CO2-based pathway (2040 scenario)	Ethylene oxide	Ethylene oxide production	CO2	Input	3	kg	FALSE	Has_Input
[44]	CO2-based pathway (2040 scenario)	Ethylene oxide	Ethylene oxide production	CO2 recycling	Input	3.03	kg	FALSE	Has_Input
[44]	CO2-based pathway (2040 scenario)	Ethylene oxide	Ethylene oxide production	H2O	Input	10.6	kg	FALSE	Has_Input
[44]	CO2-based pathway (2040 scenario)	Ethylene oxide	Ethylene oxide production	Stoichiometric demand	Input	10.6	kg	FALSE	Has_Input
[44]	CO2-based pathway (2040 scenario)	Ethylene oxide	Ethylene oxide production	Electricity	Input	0.16	GJ	FALSE	Has_Input
[44]	CO2-based pathway (2040 scenario)	Ethylene oxide	Ethylene oxide production	Steam	Input	0.74	kg	FALSE	Has_Input
[44]	CO2-based pathway (2040 scenario)	Ethylene oxide	Ethylene oxide production	H2O2	Input	6.03	kg	FALSE	Has_Input
[44]	CO2-based pathway (2040 scenario)	Ethylene oxide	Ethylene oxide production	C2H4	Input	0.637	kg	FALSE	Has_Input
[44]	CO2-based pathway (2040 scenario)	Ethylene oxide	Ethylene oxide production	Ethylene oxide	Output	1	kg	TRUE	Has_Output
[44]	CO2-based pathway (2040 scenario)	Ethylene oxide	Ethylene oxide production	H2	Output	0.145	kg	FALSE	Has_Output
[44]	CO2-based pathway (2040 scenario)	Ethylene oxide	Ethylene oxide production	CH4	Output	0.129	kg	FALSE	Has_Output
[44]	CO2-based pathway (2040 scenario)	Ethylene oxide	Ethylene oxide production	H2O2	Output	5.26	kg	FALSE	Has_Output
[44]	CO2-based pathway (2040 scenario)	Ethylene oxide	Ethylene oxide production	C2H4	Output	0.03158	kg	FALSE	Has_Output
[44]	CO2-based pathway (2040 scenario)	Ethylene oxide	Ethylene oxide production	H2	Output	0.00022	kg	FALSE	Has_Output
[44]	CO2-based pathway (2040 scenario)	Ethylene oxide	Ethylene oxide production	CH4	Output	0.00523	kg	FALSE	Has_Output
[44]	CO2-based pathway (2040 scenario)	Ethylene oxide	Ethylene oxide production	CO2	Output	0.02984	kg	FALSE	Has_Output
[45]	Coal-to-EG (CtEG) pathway	Ethylene oxide	Ethylene glycol production	Coal	Input	3.17	t	FALSE	Has_Input
[45]	Coal-to-EG (CtEG) pathway	Ethylene oxide	Ethylene glycol production	Fuel Coal	Input	47.3	GJ	FALSE	Has_Input
[45]	Coal-to-EG (CtEG) pathway	Ethylene oxide	Ethylene glycol production	Electricity	Input	3.16	GJ	FALSE	Has_Input
[45]	Coal-to-EG (CtEG) pathway	Ethylene oxide	Ethylene glycol production	Ethylene glycol	Output	1	t	TRUE	Has_Output
[45]	Coal-to-EG (CtEG) pathway	Ethylene oxide	Ethylene glycol production	CO2	Output	6720	kg	FALSE	Has_Output
[45]	Coal-to-EG (CtEG) pathway	Ethylene oxide	Ethylene glycol production	CH4	Output	24.4	kg	FALSE	Has_Output
[45]	Coal-to-EG (CtEG) pathway	Ethylene oxide	Ethylene glycol production	N2O	Output	0.00769	kg	FALSE	Has_Output
[45]	Coal-to-EG (CtEG) pathway	Ethylene oxide	Ethylene glycol production	CO	Output	10.6	kg	FALSE	Has_Output
[45]	Coal-to-EG (CtEG) pathway	Ethylene oxide	Ethylene glycol production	NOx	Output	3.53	kg	FALSE	Has_Output
[45]	Coal-to-EG (CtEG) pathway	Ethylene oxide	Ethylene glycol production	SO2	Output	1.44	kg	FALSE	Has_Output
[45]	Coal-to-EG (CtEG) pathway	Ethylene oxide	Ethylene glycol production	PM10	Output	2.92	kg	FALSE	Has_Output
[45]	Coal-to-EG (CtEG) pathway	Ethylene oxide	Ethylene glycol production	VOC	Output	0.0858	kg	FALSE	Has_Output
[45]	Oil-to-EG (OtEG) pathway	Ethylene oxide	Ethylene glycol production	Oil	Input	2.31	t	FALSE	Has_Input
[45]	Oil-to-EG (OtEG) pathway	Ethylene oxide	Ethylene glycol production	Fuel Coal	Input	3.06	GJ	FALSE	Has_Input
[45]	Oil-to-EG (OtEG) pathway	Ethylene oxide	Ethylene glycol production	Electricity	Input	2.1	GJ	FALSE	Has_Input
[45]	Oil-to-EG (OtEG) pathway	Ethylene oxide	Ethylene glycol production	Ethylene glycol	Output	1	t	TRUE	Has_Output
[45]	Oil-to-EG (OtEG) pathway	Ethylene oxide	Ethylene glycol production	CO2	Output	4650	kg	FALSE	Has_Output
[45]	Oil-to-EG (OtEG) pathway	Ethylene oxide	Ethylene glycol production	CH4	Output	9.45	kg	FALSE	Has_Output
[45]	Oil-to-EG (OtEG) pathway	Ethylene oxide	Ethylene glycol production	N2O	Output	0.0385	kg	FALSE	Has_Output
[45]	Oil-to-EG (OtEG) pathway	Ethylene oxide	Ethylene glycol production	CO	Output	3.74	kg	FALSE	Has_Output
[45]	Oil-to-EG (OtEG) pathway	Ethylene oxide	Ethylene glycol production	NOx	Output	2.68	kg	FALSE	Has_Output
[45]	Oil-to-EG (OtEG) pathway	Ethylene oxide	Ethylene glycol production	SO2	Output	6.98	kg	FALSE	Has_Output
[45]	Oil-to-EG (OtEG) pathway	Ethylene oxide	Ethylene glycol production	PM10	Output	2.84	kg	FALSE	Has_Output
[45]	Oil-to-EG (OtEG) pathway	Ethylene oxide	Ethylene glycol production	VOC	Output	3.48	kg	FALSE	Has_Output
[45]	Biomass-to-EG (BtEG) pathway	Ethylene oxide	Ethylene glycol production	Biomass	Input	2.48	t	FALSE	Has_Input
[45]	Biomass-to-EG (BtEG) pathway	Ethylene oxide	Ethylene glycol production	Fuel Coal	Input	47.6	GJ	FALSE	Has_Input
[45]	Biomass-to-EG (BtEG) pathway	Ethylene oxide	Ethylene glycol production	Electricity	Input	3.8	GJ	FALSE	Has_Input
[45]	Biomass-to-EG (BtEG) pathway	Ethylene oxide	Ethylene glycol production	Ethylene glycol	Output	1	t	TRUE	Has_Output
[45]	Biomass-to-EG (BtEG) pathway	Ethylene oxide	Ethylene glycol production	CO2	Output	3180	kg	FALSE	Has_Output
[45]	Biomass-to-EG (BtEG) pathway	Ethylene oxide	Ethylene glycol production	CH4	Output	28.2	kg	FALSE	Has_Output
[45]	Biomass-to-EG (BtEG) pathway	Ethylene oxide	Ethylene glycol production	N2O	Output	0.00859	kg	FALSE	Has_Output
[45]	Biomass-to-EG (BtEG) pathway	Ethylene oxide	Ethylene glycol production	CO	Output	13.9	kg	FALSE	Has_Output
[45]	Biomass-to-EG (BtEG) pathway	Ethylene oxide	Ethylene glycol production	NOx	Output	3.77	kg	FALSE	Has_Output
[45]	Biomass-to-EG (BtEG) pathway	Ethylene oxide	Ethylene glycol production	SO2	Output	2.12	kg	FALSE	Has_Output
[45]	Biomass-to-EG (BtEG) pathway	Ethylene oxide	Ethylene glycol production	PM10	Output	3.73	kg	FALSE	Has_Output
[45]	Biomass-to-EG (BtEG) pathway	Ethylene oxide	Ethylene glycol production	VOC	Output	0.0446	kg	FALSE	Has_Output
[46]	Petro EG	Ethylene oxide	Ethylene glycol production	Ethylene	Input	0.75	t	FALSE	Has_Input
[46]	Petro EG	Ethylene oxide	Ethylene glycol production	Water	Input	3	t	FALSE	Has_Input
[46]	Petro EG	Ethylene oxide	Ethylene glycol production	Electricity	Input	300	kWh	FALSE	Has_Input
[46]	Petro EG	Ethylene oxide	Ethylene glycol production	4.2 MPa steam	Input	0.1	t	FALSE	Has_Input
[46]	Petro EG	Ethylene oxide	Ethylene glycol production	1.5 MPa steam	Input	0.4	t	FALSE	Has_Input
[46]	Petro EG	Ethylene oxide	Ethylene glycol production	0.5 MPa steam	Input	0.1	t	FALSE	Has_Input
[46]	Petro EG	Ethylene oxide	Ethylene glycol production	Ethylene glycol	Output	1	t	TRUE	Has_Output
[46]	Petro EG	Ethylene oxide	Ethylene glycol production	Direct CO2 emissions	Output	0.94	t	FALSE	Has_Output
[46]	Coal EG	Ethylene oxide	Ethylene glycol production	Coal	Input	3.17	t	FALSE	Has_Input
[46]	Coal EG	Ethylene oxide	Ethylene glycol production	Electricity	Input	1200	kWh	FALSE	Has_Input
[46]	Coal EG	Ethylene oxide	Ethylene glycol production	4.2 MPa steam	Input	0.42	t	FALSE	Has_Input
[46]	Coal EG	Ethylene oxide	Ethylene glycol production	1.5 MPa steam	Input	4.5	t	FALSE	Has_Input
[46]	Coal EG	Ethylene oxide	Ethylene glycol production	0.5 MPa steam	Input	3.9	t	FALSE	Has_Input
[46]	Coal EG	Ethylene oxide	Ethylene glycol production	Ethylene glycol	Output	1	t	TRUE	Has_Output
[46]	Coal EG	Ethylene oxide	Ethylene glycol production	Direct CO2 emissions	Output	5.44	t	FALSE	Has_Output
[47]	Lignocellulosic biomass-based pathway (EAX OC)	Acetic acid	Acetic acid production	Feedstock (bone dry)	Input	1.9	t	FALSE	Has_Input
[47]	Lignocellulosic biomass-based pathway (EAX OC)	Acetic acid	Acetic acid production	Enzymes	Input	16	kg	FALSE	Has_Input
[47]	Lignocellulosic biomass-based pathway (EAX OC)	Acetic acid	Acetic acid production	Sulfuric Acid	Input	34	kg	FALSE	Has_Input
[47]	Lignocellulosic biomass-based pathway (EAX OC)	Acetic acid	Acetic acid production	Ammonia	Input	23	kg	FALSE	Has_Input
[47]	Lignocellulosic biomass-based pathway (EAX OC)	Acetic acid	Acetic acid production	Sodium hydroxide	Input	45	kg	FALSE	Has_Input
[47]	Lignocellulosic biomass-based pathway (EAX OC)	Acetic acid	Acetic acid production	Clarifier polymer	Input	1.1	kg	FALSE	Has_Input
[47]	Lignocellulosic biomass-based pathway (EAX OC)	Acetic acid	Acetic acid production	Fermentation nutrients	Input	50	kg	FALSE	Has_Input
[47]	Lignocellulosic biomass-based pathway (EAX OC)	Acetic acid	Acetic acid production	Lime	Input	26	kg	FALSE	Has_Input
[47]	Lignocellulosic biomass-based pathway (EAX OC)	Acetic acid	Acetic acid production	Natural gas	Input	53	GJ	FALSE	Has_Input
[47]	Lignocellulosic biomass-based pathway (EAX OC)	Acetic acid	Acetic acid production	Ethyl acetate	Input	5.2	kg	FALSE	Has_Input
[47]	Lignocellulosic biomass-based pathway (EAX OC)	Acetic acid	Acetic acid production	Acetic acid	Output	1	t	TRUE	Has_Output
[47]	Lignocellulosic biomass-based pathway (EAX OC)	Acetic acid	Acetic acid production	Electricity	Output	2600	kWh	FALSE	Has_Output
[47]	Lignocellulosic biomass-based pathway (EAX OC)	Acetic acid	Acetic acid production	CO2 (from lignin)	Output	1.8	t	FALSE	Has_Output
[47]	Lignocellulosic biomass-based pathway (EAX OC)	Acetic acid	Acetic acid production	CO2 (from natural gas)	Output	2.7	t	FALSE	Has_Output
[47]	Lignocellulosic biomass-based pathway (EAX LE)	Acetic acid	Acetic acid production	Feedstock (bone dry)	Input	1.9	t	FALSE	Has_Input
[47]	Lignocellulosic biomass-based pathway (EAX LE)	Acetic acid	Acetic acid production	Enzymes	Input	16	kg	FALSE	Has_Input
[47]	Lignocellulosic biomass-based pathway (EAX LE)	Acetic acid	Acetic acid production	Sulfuric Acid	Input	34	kg	FALSE	Has_Input
[47]	Lignocellulosic biomass-based pathway (EAX LE)	Acetic acid	Acetic acid production	Ammonia	Input	23	kg	FALSE	Has_Input
[47]	Lignocellulosic biomass-based pathway (EAX LE)	Acetic acid	Acetic acid production	Sodium hydroxide	Input	45	kg	FALSE	Has_Input
[47]	Lignocellulosic biomass-based pathway (EAX LE)	Acetic acid	Acetic acid production	Clarifier polymer	Input	1.1	kg	FALSE	Has_Input
[47]	Lignocellulosic biomass-based pathway (EAX LE)	Acetic acid	Acetic acid production	Fermentation nutrients	Input	50	kg	FALSE	Has_Input
[47]	Lignocellulosic biomass-based pathway (EAX LE)	Acetic acid	Acetic acid production	Natural gas	Input	58	GJ	FALSE	Has_Input
[47]	Lignocellulosic biomass-based pathway (EAX LE)	Acetic acid	Acetic acid production	Ethyl acetate	Input	5.2	kg	FALSE	Has_Input
[47]	Lignocellulosic biomass-based pathway (EAX LE)	Acetic acid	Acetic acid production	Electricity	Input	320	kWh	FALSE	Has_Input
[47]	Lignocellulosic biomass-based pathway (EAX LE)	Acetic acid	Acetic acid production	Acetic acid	Output	1	t	TRUE	Has_Output
[47]	Lignocellulosic biomass-based pathway (EAX LE)	Acetic acid	Acetic acid production	Lignin (bone dry)	Output	440	kg	FALSE	Has_Output
[47]	Lignocellulosic biomass-based pathway (EAX LE)	Acetic acid	Acetic acid production	CO2 (from natural gas)	Output	3.2	t	FALSE	Has_Output
[47]	Lignocellulosic biomass-based pathway (ADX OC)	Acetic acid	Acetic acid production	Feedstock (bone dry)	Input	1.9	t	FALSE	Has_Input
[47]	Lignocellulosic biomass-based pathway (ADX OC)	Acetic acid	Acetic acid production	Enzymes	Input	16	kg	FALSE	Has_Input
[47]	Lignocellulosic biomass-based pathway (ADX OC)	Acetic acid	Acetic acid production	Sulfuric Acid	Input	34	kg	FALSE	Has_Input
[47]	Lignocellulosic biomass-based pathway (ADX OC)	Acetic acid	Acetic acid production	Ammonia	Input	23	kg	FALSE	Has_Input
[47]	Lignocellulosic biomass-based pathway (ADX OC)	Acetic acid	Acetic acid production	Sodium hydroxide	Input	45	kg	FALSE	Has_Input
[47]	Lignocellulosic biomass-based pathway (ADX OC)	Acetic acid	Acetic acid production	Clarifier polymer	Input	1.1	kg	FALSE	Has_Input
[47]	Lignocellulosic biomass-based pathway (ADX OC)	Acetic acid	Acetic acid production	Fermentation nutrients	Input	50	kg	FALSE	Has_Input
[47]	Lignocellulosic biomass-based pathway (ADX OC)	Acetic acid	Acetic acid production	Lime	Input	26	kg	FALSE	Has_Input
[47]	Lignocellulosic biomass-based pathway (ADX OC)	Acetic acid	Acetic acid production	Natural gas	Input	19	GJ	FALSE	Has_Input
[47]	Lignocellulosic biomass-based pathway (ADX OC)	Acetic acid	Acetic acid production	Alamine	Input	1.9	kg	FALSE	Has_Input
[47]	Lignocellulosic biomass-based pathway (ADX OC)	Acetic acid	Acetic acid production	Diisobutyl ketone (DIBK)	Input	1.9	kg	FALSE	Has_Input
[47]	Lignocellulosic biomass-based pathway (ADX OC)	Acetic acid	Acetic acid production	Acetic acid	Output	1	t	TRUE	Has_Output
[47]	Lignocellulosic biomass-based pathway (ADX OC)	Acetic acid	Acetic acid production	Electricity	Output	860	kWh	FALSE	Has_Output
[47]	Lignocellulosic biomass-based pathway (ADX OC)	Acetic acid	Acetic acid production	CO2 (from lignin)	Output	1.8	t	FALSE	Has_Output
[47]	Lignocellulosic biomass-based pathway (ADX OC)	Acetic acid	Acetic acid production	CO2 (from natural gas)	Output	0.99	t	FALSE	Has_Output
[47]	Lignocellulosic biomass-based pathway (ADX LE)	Acetic acid	Acetic acid production	Feedstock (bone dry)	Input	1.9	t	FALSE	Has_Input
[47]	Lignocellulosic biomass-based pathway (ADX LE)	Acetic acid	Acetic acid production	Enzymes	Input	16	kg	FALSE	Has_Input
[47]	Lignocellulosic biomass-based pathway (ADX LE)	Acetic acid	Acetic acid production	Sulfuric Acid	Input	34	kg	FALSE	Has_Input
[47]	Lignocellulosic biomass-based pathway (ADX LE)	Acetic acid	Acetic acid production	Ammonia	Input	23	kg	FALSE	Has_Input
[47]	Lignocellulosic biomass-based pathway (ADX LE)	Acetic acid	Acetic acid production	Sodium hydroxide	Input	45	kg	FALSE	Has_Input
[47]	Lignocellulosic biomass-based pathway (ADX LE)	Acetic acid	Acetic acid production	Clarifier polymer	Input	1.1	kg	FALSE	Has_Input
[47]	Lignocellulosic biomass-based pathway (ADX LE)	Acetic acid	Acetic acid production	Fermentation nutrients	Input	50	kg	FALSE	Has_Input
[47]	Lignocellulosic biomass-based pathway (ADX LE)	Acetic acid	Acetic acid production	Natural gas	Input	28	GJ	FALSE	Has_Input
[47]	Lignocellulosic biomass-based pathway (ADX LE)	Acetic acid	Acetic acid production	Alamine	Input	1.9	kg	FALSE	Has_Input
[47]	Lignocellulosic biomass-based pathway (ADX LE)	Acetic acid	Acetic acid production	Diisobutyl ketone (DIBK)	Input	1.9	kg	FALSE	Has_Input
[47]	Lignocellulosic biomass-based pathway (ADX LE)	Acetic acid	Acetic acid production	Electricity	Input	300	kWh	FALSE	Has_Input
[47]	Lignocellulosic biomass-based pathway (ADX LE)	Acetic acid	Acetic acid production	Acetic acid	Output	1	t	TRUE	Has_Output
[47]	Lignocellulosic biomass-based pathway (ADX LE)	Acetic acid	Acetic acid production	Lignin (bone dry)	Output	440	kg	FALSE	Has_Output
[47]	Lignocellulosic biomass-based pathway (ADX LE)	Acetic acid	Acetic acid production	CO2 (from natural gas)	Output	1.4	t	FALSE	Has_Output
[50]	Propane dehydrogenation (PDH) pathway	Propylene	Propylene production	Propane	Input	1.24	t	FALSE	Has_Input
[50]	Propane dehydrogenation (PDH) pathway	Propylene	Propylene production	Pt	Input	386.67	g	FALSE	Has_Input
[50]	Propane dehydrogenation (PDH) pathway	Propylene	Propylene production	Pd	Input	22	g	FALSE	Has_Input
[50]	Propane dehydrogenation (PDH) pathway	Propylene	Propylene production	Styrene-divinylbenzene polymer	Input	164	g	FALSE	Has_Input
[50]	Propane dehydrogenation (PDH) pathway	Propylene	Propylene production	Aluminum oxide	Input	930.85	g	FALSE	Has_Input
[50]	Propane dehydrogenation (PDH) pathway	Propylene	Propylene production	Chlorine	Input	108.83	g	FALSE	Has_Input
[50]	Propane dehydrogenation (PDH) pathway	Propylene	Propylene production	Dimethyl disulfide	Input	37.17	g	FALSE	Has_Input
[50]	Propane dehydrogenation (PDH) pathway	Propylene	Propylene production	Sodium hydroxide	Input	7490	g	FALSE	Has_Input
[50]	Propane dehydrogenation (PDH) pathway	Propylene	Propylene production	Nitrogen	Input	8.8	Nm^3	FALSE	Has_Input
[50]	Propane dehydrogenation (PDH) pathway	Propylene	Propylene production	Wind	Input	38.7	Nm^3	FALSE	Has_Input
[50]	Propane dehydrogenation (PDH) pathway	Propylene	Propylene production	Fresh water	Input	7.39	t	FALSE	Has_Input
[50]	Propane dehydrogenation (PDH) pathway	Propylene	Propylene production	Electricity	Input	147.55	kWh	FALSE	Has_Input
[50]	Propane dehydrogenation (PDH) pathway	Propylene	Propylene production	Steam	Input	2.86	t	FALSE	Has_Input
[50]	Propane dehydrogenation (PDH) pathway	Propylene	Propylene production	Fuel gas	Input	0.11	t	FALSE	Has_Input
[50]	Propane dehydrogenation (PDH) pathway	Propylene	Propylene production	Propylene	Output	1	t	TRUE	Has_Output
[50]	Propane dehydrogenation (PDH) pathway	Propylene	Propylene production	C4+	Output	0.06	t	FALSE	Has_Output
[50]	Propane dehydrogenation (PDH) pathway	Propylene	Propylene production	Hydrogen	Output	0.04	t	FALSE	Has_Output
[50]	Propane dehydrogenation (PDH) pathway	Propylene	Propylene production	C2	Output	0.1	t	FALSE	Has_Output
[50]	Propane dehydrogenation (PDH) pathway	Propylene	Propylene production	CO2	Output	0.41	t	FALSE	Has_Output
[50]	Propane dehydrogenation (PDH) pathway	Propylene	Propylene production	SO2	Output	31.4	g	FALSE	Has_Output
[50]	Propane dehydrogenation (PDH) pathway	Propylene	Propylene production	NOX	Output	251.67	g	FALSE	Has_Output
[50]	Propane dehydrogenation (PDH) pathway	Propylene	Propylene production	Particulate matter	Output	65	g	FALSE	Has_Output
[50]	Propane dehydrogenation (PDH) pathway	Propylene	Propylene production	Chlorine	Output	4.62	g	FALSE	Has_Output
[50]	Propane dehydrogenation (PDH) pathway	Propylene	Propylene production	HCL	Output	1.68	g	FALSE	Has_Output
[50]	Propane dehydrogenation (PDH) pathway	Propylene	Propylene production	COD	Output	3.45	g	FALSE	Has_Output
[50]	Propane dehydrogenation (PDH) pathway	Propylene	Propylene production	Ammonia nitrogen	Output	0.05	g	FALSE	Has_Output
[50]	Coal to olefin (CTO) pathway	Propylene	Propylene production	Methanol	Input	4.48	t	FALSE	Has_Input
[50]	Coal to olefin (CTO) pathway	Propylene	Propylene production	Hydrogen	Input	1.24	kg	FALSE	Has_Input
[50]	Coal to olefin (CTO) pathway	Propylene	Propylene production	Sodium hydroxide	Input	30.03	kg	FALSE	Has_Input
[50]	Coal to olefin (CTO) pathway	Propylene	Propylene production	Dimethyl disulfide	Input	0.12	kg	FALSE	Has_Input
[50]	Coal to olefin (CTO) pathway	Propylene	Propylene production	Nitrogen	Input	266.21	Nm^3	FALSE	Has_Input
[50]	Coal to olefin (CTO) pathway	Propylene	Propylene production	Steam	Input	5.85	t	FALSE	Has_Input
[50]	Coal to olefin (CTO) pathway	Propylene	Propylene production	Fresh water	Input	2.86	t	FALSE	Has_Input
[50]	Coal to olefin (CTO) pathway	Propylene	Propylene production	Electricity	Input	397.94	kWh	FALSE	Has_Input
[50]	Coal to olefin (CTO) pathway	Propylene	Propylene production	Propylene	Output	1	t	TRUE	Has_Output
[50]	Coal to olefin (CTO) pathway	Propylene	Propylene production	Ethylene	Output	0.67	t	FALSE	Has_Output
[50]	Coal to olefin (CTO) pathway	Propylene	Propylene production	LPG	Output	0.03	t	FALSE	Has_Output
[50]	Coal to olefin (CTO) pathway	Propylene	Propylene production	C5	Output	0.04	t	FALSE	Has_Output
[50]	Coal to olefin (CTO) pathway	Propylene	Propylene production	gasoline	Output	0.06	t	FALSE	Has_Output
[50]	Coal to olefin (CTO) pathway	Propylene	Propylene production	Others	Output	0.01	t	FALSE	Has_Output
[50]	Coal to olefin (CTO) pathway	Propylene	Propylene production	CO2	Output	0.27	t	FALSE	Has_Output
[50]	Coal to olefin (CTO) pathway	Propylene	Propylene production	CO	Output	25.42	g	FALSE	Has_Output
[50]	Coal to olefin (CTO) pathway	Propylene	Propylene production	Particulate matter	Output	7.94	g	FALSE	Has_Output
[50]	Coal to olefin (CTO) pathway	Propylene	Propylene production	NOX	Output	132.33	g	FALSE	Has_Output
[50]	Coal to olefin (CTO) pathway	Propylene	Propylene production	Carboxylic acid sodium	Output	1018.37	g	FALSE	Has_Output
[50]	Coal to olefin (CTO) pathway	Propylene	Propylene production	COD	Output	421.36	g	FALSE	Has_Output
[50]	Coal to olefin (CTO) pathway	Propylene	Propylene production	BOD5	Output	151.43	g	FALSE	Has_Output
[50]	Coal to olefin (CTO) pathway	Propylene	Propylene production	TDS	Output	21.64	g	FALSE	Has_Output
[50]	Steam cracking (SC) pathway	Propylene	Propylene production	Refinery dry gas	Input	2.68	t	FALSE	Has_Input
[50]	Steam cracking (SC) pathway	Propylene	Propylene production	Naphtha	Input	2.97	t	FALSE	Has_Input
[50]	Steam cracking (SC) pathway	Propylene	Propylene production	N-butane	Input	1.52	t	FALSE	Has_Input
[50]	Steam cracking (SC) pathway	Propylene	Propylene production	N-pentane and n-hexane	Input	1.25	t	FALSE	Has_Input
[50]	Steam cracking (SC) pathway	Propylene	Propylene production	Methanol	Input	82.47	g	FALSE	Has_Input
[50]	Steam cracking (SC) pathway	Propylene	Propylene production	Sodium hydroxide	Input	23915.3	g	FALSE	Has_Input
[50]	Steam cracking (SC) pathway	Propylene	Propylene production	Dimethyl disulfide	Input	633.98	g	FALSE	Has_Input
[50]	Steam cracking (SC) pathway	Propylene	Propylene production	Phosphate	Input	136.21	g	FALSE	Has_Input
[50]	Steam cracking (SC) pathway	Propylene	Propylene production	Fuel gas	Input	1.23	t	FALSE	Has_Input
[50]	Steam cracking (SC) pathway	Propylene	Propylene production	Steam	Input	3.66	t	FALSE	Has_Input
[50]	Steam cracking (SC) pathway	Propylene	Propylene production	Fresh water	Input	9.05	t	FALSE	Has_Input
[50]	Steam cracking (SC) pathway	Propylene	Propylene production	Electricity	Input	200.3	kWh	FALSE	Has_Input
[50]	Steam cracking (SC) pathway	Propylene	Propylene production	Propylene	Output	1	t	TRUE	Has_Output
[50]	Steam cracking (SC) pathway	Propylene	Propylene production	Ethylene	Output	3.71	t	FALSE	Has_Output
[50]	Steam cracking (SC) pathway	Propylene	Propylene production	Pyrolysis gasoline	Output	0.92	t	FALSE	Has_Output
[50]	Steam cracking (SC) pathway	Propylene	Propylene production	Crack fuel oil	Output	0.12	t	FALSE	Has_Output
[50]	Steam cracking (SC) pathway	Propylene	Propylene production	C4+	Output	0.61	t	FALSE	Has_Output
[50]	Steam cracking (SC) pathway	Propylene	Propylene production	Hydrogen	Output	0.17	t	FALSE	Has_Output
[50]	Steam cracking (SC) pathway	Propylene	Propylene production	Hydrogen/methane	Output	2.08	t	FALSE	Has_Output
[50]	Steam cracking (SC) pathway	Propylene	Propylene production	CO2	Output	3.56	t	FALSE	Has_Output
[50]	Steam cracking (SC) pathway	Propylene	Propylene production	SO2	Output	304.51	g	FALSE	Has_Output
[50]	Steam cracking (SC) pathway	Propylene	Propylene production	NOX	Output	2588.21	g	FALSE	Has_Output
[50]	Steam cracking (SC) pathway	Propylene	Propylene production	Particulate matter	Output	304.51	g	FALSE	Has_Output
[50]	Steam cracking (SC) pathway	Propylene	Propylene production	COD	Output	5086.18	g	FALSE	Has_Output
[50]	Catalytic cracking (CC) pathway	Propylene	Propylene production	LPG	Input	3.02	t	FALSE	Has_Input
[50]	Catalytic cracking (CC) pathway	Propylene	Propylene production	Nitrogen	Input	14.48	Nm^3	FALSE	Has_Input
[50]	Catalytic cracking (CC) pathway	Propylene	Propylene production	Fresh water	Input	0.14	t	FALSE	Has_Input
[50]	Catalytic cracking (CC) pathway	Propylene	Propylene production	Propylene	Output	1	t	TRUE	Has_Output
[50]	Catalytic cracking (CC) pathway	Propylene	Propylene production	Ethane/propane	Output	0.37	t	FALSE	Has_Output
[50]	Catalytic cracking (CC) pathway	Propylene	Propylene production	C4+/C5+	Output	1.65	t	FALSE	Has_Output
[51]	Methanol-to-olefins (MTO) pathway	Propylene	Propylene production	Crude coal	Input	10.188	t	FALSE	Has_Input
[51]	Methanol-to-olefins (MTO) pathway	Propylene	Propylene production	Electricity	Input	542.25	kWh	FALSE	Has_Input
[51]	Methanol-to-olefins (MTO) pathway	Propylene	Propylene production	Fuel coal	Input	3.75	t	FALSE	Has_Input
[51]	Methanol-to-olefins (MTO) pathway	Propylene	Propylene production	Fresh water	Input	55.47	t	FALSE	Has_Input
[51]	Methanol-to-olefins (MTO) pathway	Propylene	Propylene production	Ethylene	Output	0.92	t	FALSE	Has_Output
[51]	Methanol-to-olefins (MTO) pathway	Propylene	Propylene production	Propylene	Output	1	t	TRUE	Has_Output
[51]	Methanol-to-olefins (MTO) pathway	Propylene	Propylene production	C4-hydrocarbon	Output	0.41	t	FALSE	Has_Output
[51]	Methanol-to-olefins (MTO) pathway	Propylene	Propylene production	C5-hydrocarbon	Output	0.09	t	FALSE	Has_Output
[51]	Methanol-topropylene (MTP) pathway	Propylene	Propylene production	Crude coal	Input	7.19	t	FALSE	Has_Input
[51]	Methanol-topropylene (MTP) pathway	Propylene	Propylene production	Electricity	Input	166.99	kWh	FALSE	Has_Input
[51]	Methanol-topropylene (MTP) pathway	Propylene	Propylene production	Fuel coal	Input	2.15	t	FALSE	Has_Input
[51]	Methanol-topropylene (MTP) pathway	Propylene	Propylene production	Fresh water	Input	57.35	t	FALSE	Has_Input
[51]	Methanol-topropylene (MTP) pathway	Propylene	Propylene production	Propylene	Output	1	t	TRUE	Has_Output
[51]	Methanol-topropylene (MTP) pathway	Propylene	Propylene production	Aromatic hydrocarbon	Output	0.4	t	FALSE	Has_Output
[51]	Methanol-topropylene (MTP) pathway	Propylene	Propylene production	LPG	Output	0.16	t	FALSE	Has_Output
[53]	Petro-based pathway	Propylene oxide	Propylene oxide production	Chlorine, production mix, at plant	Input	0.573	kg	FALSE	Has_Input
[53]	Petro-based pathway	Propylene oxide	Propylene oxide production	Disposal, solid waste, to sanitary landfill	Input	0.0002	kg	FALSE	Has_Input
[53]	Petro-based pathway	Propylene oxide	Propylene oxide production	Transport, pipeline, natural gas	Input	0.000159	t.km	FALSE	Has_Input
[53]	Petro-based pathway	Propylene oxide	Propylene oxide production	Transport, pipeline petroleum products	Input	0.393	t.km	FALSE	Has_Input
[53]	Petro-based pathway	Propylene oxide	Propylene oxide production	Electricity, residual fuel oil	Input	0.28314	kWh	FALSE	Has_Input
[53]	Petro-based pathway	Propylene oxide	Propylene oxide production	Natural gas, combusted in industrial boiler	Input	0.14531	m^3	FALSE	Has_Input
[53]	Petro-based pathway	Propylene oxide	Propylene oxide production	Oxygen, liquid, at plant	Input	0.09861	kg	FALSE	Has_Input
[53]	Petro-based pathway	Propylene oxide	Propylene oxide production	Propylene, at plant	Input	0.77258	kg	FALSE	Has_Input
[53]	Petro-based pathway	Propylene oxide	Propylene oxide production	Residual fuel oil, combusted in industrial boiler	Input	0.13102	L	FALSE	Has_Input
[53]	Petro-based pathway	Propylene oxide	Propylene oxide production	Sodium chloride, at plant	Input	0.928	kg	FALSE	Has_Input
[53]	Petro-based pathway	Propylene oxide	Propylene oxide production	Sodium hydroxide, production mix, at plant	Input	0.689	kg	FALSE	Has_Input
[53]	Petro-based pathway	Propylene oxide	Propylene oxide production	Transport, barge, diesel powered	Input	0.000821	t.km	FALSE	Has_Input
[53]	Petro-based pathway	Propylene oxide	Propylene oxide production	Transport, barge, residual fuel oil powered	Input	0.00291	t.km	FALSE	Has_Input
[53]	Petro-based pathway	Propylene oxide	Propylene oxide production	Transport, combination truck, diesel powered	Input	0.0338	t.km	FALSE	Has_Input
[53]	Petro-based pathway	Propylene oxide	Propylene oxide production	Transport, train, diesel powered	Input	0.095	t.km	FALSE	Has_Input
[53]	Petro-based pathway	Propylene oxide	Propylene oxide production	Acidity	Output	4.43e-05	kg	FALSE	Has_Output
[53]	Petro-based pathway	Propylene oxide	Propylene oxide production	Acidity	Output	0.00995	kg	FALSE	Has_Output
[53]	Petro-based pathway	Propylene oxide	Propylene oxide production	Ammonia	Output	4.89e-05	kg	FALSE	Has_Output
[53]	Petro-based pathway	Propylene oxide	Propylene oxide production	Benzene, ethyl-	Output	0.000955	kg	FALSE	Has_Output
[53]	Petro-based pathway	Propylene oxide	Propylene oxide production	Carbon dioxide	Output	0.0128	kg	FALSE	Has_Output
[53]	Petro-based pathway	Propylene oxide	Propylene oxide production	Chlorine	Output	1.26e-06	kg	FALSE	Has_Output
[53]	Petro-based pathway	Propylene oxide	Propylene oxide production	Hydrocarbons	Output	0.000923	kg	FALSE	Has_Output
[53]	Petro-based pathway	Propylene oxide	Propylene oxide production	NMVOC	Output	0.00583	kg	FALSE	Has_Output
[53]	Petro-based pathway	Propylene oxide	Propylene oxide production	Phenols	Output	0.00133	kg	FALSE	Has_Output
[53]	Petro-based pathway	Propylene oxide	Propylene oxide production	Propylene oxide (Air)	Output	0.000472	kg	FALSE	Has_Output
[53]	Petro-based pathway	Propylene oxide	Propylene oxide production	Propylene oxide	Output	1	kg	TRUE	Has_Output
[53]	Petro-based pathway	Propylene oxide	Propylene oxide production	Sodium hydroxide	Output	0.00142	kg	FALSE	Has_Output
[55]	Propylene oxide conversion (BAU)	Propylene glycol	Propylene glycol production	Propylene oxide	Input	0.9	kg	FALSE	Has_Input
[55]	Propylene oxide conversion (BAU)	Propylene glycol	Propylene glycol production	Water	Input	0.211	kg	FALSE	Has_Input
[55]	Propylene oxide conversion (BAU)	Propylene glycol	Propylene glycol production	Electricity	Input	0.123	kWh	FALSE	Has_Input
[55]	Propylene oxide conversion (BAU)	Propylene glycol	Propylene glycol production	Net heating demand	Input	11.973	MJ	FALSE	Has_Input
[55]	Propylene oxide conversion (BAU)	Propylene glycol	Propylene glycol production	Net cooling demand	Input	13.38	MJ	FALSE	Has_Input
[55]	Propylene oxide conversion (BAU)	Propylene glycol	Propylene glycol production	Dipropylene glycol	Output	0.082	kg	FALSE	Has_Output
[55]	Propylene oxide conversion (BAU)	Propylene glycol	Propylene glycol production	Tripropylene glycol	Output	0.0735	kg	FALSE	Has_Output
[55]	Propylene oxide conversion (BAU)	Propylene glycol	Propylene glycol production	Propylene glycol	Output	1	kg	TRUE	Has_Output
[55]	Hydrogenolysis of glycerol (GB-1)	Propylene glycol	Propylene glycol production	Glycerol solution 90 wt.%	Input	1.422	kg	FALSE	Has_Input
[55]	Hydrogenolysis of glycerol (GB-1)	Propylene glycol	Propylene glycol production	Hydrogen	Input	0.0311	kg	FALSE	Has_Input
[55]	Hydrogenolysis of glycerol (GB-1)	Propylene glycol	Propylene glycol production	Water	Input	0.009	kg	FALSE	Has_Input
[55]	Hydrogenolysis of glycerol (GB-1)	Propylene glycol	Propylene glycol production	Electricity	Input	0.058	kWh	FALSE	Has_Input
[55]	Hydrogenolysis of glycerol (GB-1)	Propylene glycol	Propylene glycol production	Net heating demand	Input	4.956	MJ	FALSE	Has_Input
[55]	Hydrogenolysis of glycerol (GB-1)	Propylene glycol	Propylene glycol production	Net cooling demand	Input	6.296	MJ	FALSE	Has_Input
[55]	Hydrogenolysis of glycerol (GB-1)	Propylene glycol	Propylene glycol production	Gas Purge	Output	0.005	kg	FALSE	Has_Output
[55]	Hydrogenolysis of glycerol (GB-1)	Propylene glycol	Propylene glycol production	Wastewater	Output	0.438	kg	FALSE	Has_Output
[55]	Hydrogenolysis of glycerol (GB-1)	Propylene glycol	Propylene glycol production	Methanol	Output	0.0104	kg	FALSE	Has_Output
[55]	Hydrogenolysis of glycerol (GB-1)	Propylene glycol	Propylene glycol production	Ethylene glycol	Output	0.0165	kg	FALSE	Has_Output
[55]	Hydrogenolysis of glycerol (GB-1)	Propylene glycol	Propylene glycol production	Propylene glycol production	Output	1	kg	TRUE	Has_Output
[55]	Hydrogenolysis of glycerol (GB-2)	Propylene glycol	Propylene glycol production	Glycerol solution 90 wt.%	Input	1.39	kg	FALSE	Has_Input
[55]	Hydrogenolysis of glycerol (GB-2)	Propylene glycol	Propylene glycol production	Hydrogen	Input	0.041	kg	FALSE	Has_Input
[55]	Hydrogenolysis of glycerol (GB-2)	Propylene glycol	Propylene glycol production	Electricity	Input	0.058	kWh	FALSE	Has_Input
[55]	Hydrogenolysis of glycerol (GB-2)	Propylene glycol	Propylene glycol production	Net heating demand	Input	4.98	MJ	FALSE	Has_Input
[55]	Hydrogenolysis of glycerol (GB-2)	Propylene glycol	Propylene glycol production	Net cooling demand	Input	6.264	MJ	FALSE	Has_Input
[55]	Hydrogenolysis of glycerol (GB-2)	Propylene glycol	Propylene glycol production	Gas Purge	Output	0.007	kg	FALSE	Has_Output
[55]	Hydrogenolysis of glycerol (GB-2)	Propylene glycol	Propylene glycol production	Wastewater	Output	0.374	kg	FALSE	Has_Output
[55]	Hydrogenolysis of glycerol (GB-2)	Propylene glycol	Propylene glycol production	Methanol	Output	0.013	kg	FALSE	Has_Output
[55]	Hydrogenolysis of glycerol (GB-2)	Propylene glycol	Propylene glycol production	Ethylene glycol	Output	0.026	kg	FALSE	Has_Output
[55]	Hydrogenolysis of glycerol (GB-2)	Propylene glycol	Propylene glycol production	Propylene glycol production	Output	1	kg	TRUE	Has_Output
[55]	Hydrogenolysis of glycerol (GB-3)	Propylene glycol	Propylene glycol production	Glycerol solution 90 wt.%	Input	3.689	kg	FALSE	Has_Input
[55]	Hydrogenolysis of glycerol (GB-3)	Propylene glycol	Propylene glycol production	Water	Input	0.559	kg	FALSE	Has_Input
[55]	Hydrogenolysis of glycerol (GB-3)	Propylene glycol	Propylene glycol production	Electricity	Input	0.12	kWh	FALSE	Has_Input
[55]	Hydrogenolysis of glycerol (GB-3)	Propylene glycol	Propylene glycol production	Net heating demand	Input	20.041	MJ	FALSE	Has_Input
[55]	Hydrogenolysis of glycerol (GB-3)	Propylene glycol	Propylene glycol production	Net cooling demand	Input	15.664	MJ	FALSE	Has_Input
[55]	Hydrogenolysis of glycerol (GB-3)	Propylene glycol	Propylene glycol production	Gas Purge	Output	2.648	kg	FALSE	Has_Output
[55]	Hydrogenolysis of glycerol (GB-3)	Propylene glycol	Propylene glycol production	Wastewater	Output	0.398	kg	FALSE	Has_Output
[55]	Hydrogenolysis of glycerol (GB-3)	Propylene glycol	Propylene glycol production	Methanol	Output	0.032	kg	FALSE	Has_Output
[55]	Hydrogenolysis of glycerol (GB-3)	Propylene glycol	Propylene glycol production	Ethanol	Output	0.149	kg	FALSE	Has_Output
[55]	Hydrogenolysis of glycerol (GB-3)	Propylene glycol	Propylene glycol production	Propanol	Output	0.02	kg	FALSE	Has_Output
[55]	Hydrogenolysis of glycerol (GB-3)	Propylene glycol	Propylene glycol production	Propylene glycol production	Output	1	kg	TRUE	Has_Output
[58]	Natural gas-to-LA pathway	Lactic acid	Lactic acid production	Natural gas	Input	3.02	kg	FALSE	Has_Input
[58]	Natural gas-to-LA pathway	Lactic acid	Lactic acid production	Ammonia	Input	0.26	kg	FALSE	Has_Input
[58]	Natural gas-to-LA pathway	Lactic acid	Lactic acid production	Sodium hydroxide	Input	0.11	kg	FALSE	Has_Input
[58]	Natural gas-to-LA pathway	Lactic acid	Lactic acid production	Calcium hydroxide	Input	0.72	kg	FALSE	Has_Input
[58]	Natural gas-to-LA pathway	Lactic acid	Lactic acid production	Makeup water	Input	0.89	kg	FALSE	Has_Input
[58]	Natural gas-to-LA pathway	Lactic acid	Lactic acid production	Lactic acid	Output	1	kg	TRUE	Has_Output
[58]	Natural gas-to-LA pathway	Lactic acid	Lactic acid production	Wastewater	Output	5.02	kg	FALSE	Has_Output
[58]	Natural gas-to-LA pathway	Lactic acid	Lactic acid production	Solid waste	Output	0.48	kg	FALSE	Has_Output
[58]	Natural gas-to-LA pathway	Lactic acid	Lactic acid production	Direct carbon dioxide emission	Output	4.18	kg	FALSE	Has_Output
[61]	Lignocellulosic LA production (Scenario 1)	Lactic acid	Lactic acid production	Water	Input	14467	kg	FALSE	Has_Input
[61]	Lignocellulosic LA production (Scenario 1)	Lactic acid	Lactic acid production	Strains & Nutrients	Input	350	kg	FALSE	Has_Input
[61]	Lignocellulosic LA production (Scenario 1)	Lactic acid	Lactic acid production	Ethanol	Input	45	kg	FALSE	Has_Input
[61]	Lignocellulosic LA production (Scenario 1)	Lactic acid	Lactic acid production	STEAM	Input	1000	kg	FALSE	Has_Input
[61]	Lignocellulosic LA production (Scenario 1)	Lactic acid	Lactic acid production	Ca(OH)2	Input	528	kg	FALSE	Has_Input
[61]	Lignocellulosic LA production (Scenario 1)	Lactic acid	Lactic acid production	H2SO4	Input	698	kg	FALSE	Has_Input
[61]	Lignocellulosic LA production (Scenario 1)	Lactic acid	Lactic acid production	Lactic Acid	Output	1000	kg	TRUE	Has_Output
[61]	Lignocellulosic LA production (Scenario 1)	Lactic acid	Lactic acid production	Waste water	Output	19046	kg	FALSE	Has_Output
[61]	Lignocellulosic LA production (Scenario 1)	Lactic acid	Lactic acid production	Cellu-lignin	Output	4660	kg	FALSE	Has_Output
[61]	Lignocellulosic LA production (Scenario 1)	Lactic acid	Lactic acid production	Hemicellulose	Output	1719	kg	FALSE	Has_Output
[61]	Lignocellulosic LA production (Scenario 1)	Lactic acid	Lactic acid production	Gypsum(solid waste)	Output	1164	kg	FALSE	Has_Output
[61]	Lignocellulosic LA production (Scenario 2)	Lactic acid	Lactic acid production	Water	Input	9861	kg	FALSE	Has_Input
[61]	Lignocellulosic LA production (Scenario 2)	Lactic acid	Lactic acid production	Strains & Nutrients	Input	2742	kg	FALSE	Has_Input
[61]	Lignocellulosic LA production (Scenario 2)	Lactic acid	Lactic acid production	Ethanol	Input	50	kg	FALSE	Has_Input
[61]	Lignocellulosic LA production (Scenario 2)	Lactic acid	Lactic acid production	STEAM	Input	1000	kg	FALSE	Has_Input
[61]	Lignocellulosic LA production (Scenario 2)	Lactic acid	Lactic acid production	Ca(OH)2	Input	2207	kg	FALSE	Has_Input
[61]	Lignocellulosic LA production (Scenario 2)	Lactic acid	Lactic acid production	H2SO4	Input	2923	kg	FALSE	Has_Input
[61]	Lignocellulosic LA production (Scenario 2)	Lactic acid	Lactic acid production	Lactic Acid	Output	1600	kg	TRUE	Has_Output
[61]	Lignocellulosic LA production (Scenario 2)	Lactic acid	Lactic acid production	Waste water	Output	19002	kg	FALSE	Has_Output
[61]	Lignocellulosic LA production (Scenario 2)	Lactic acid	Lactic acid production	Cellu-lignin	Output	4660	kg	FALSE	Has_Output
[61]	Lignocellulosic LA production (Scenario 2)	Lactic acid	Lactic acid production	Hemicellulose	Output	1719	kg	FALSE	Has_Output
[61]	Lignocellulosic LA production (Scenario 2)	Lactic acid	Lactic acid production	Gypsum(solid waste)	Output	4200	kg	FALSE	Has_Output
[61]	Lignocellulosic LA production (Scenario 3)	Lactic acid	Lactic acid production	Water	Input	8115	kg	FALSE	Has_Input
[61]	Lignocellulosic LA production (Scenario 3)	Lactic acid	Lactic acid production	Strains & Nutrients	Input	326	kg	FALSE	Has_Input
[61]	Lignocellulosic LA production (Scenario 3)	Lactic acid	Lactic acid production	Ethanol	Input	38	kg	FALSE	Has_Input
[61]	Lignocellulosic LA production (Scenario 3)	Lactic acid	Lactic acid production	STEAM	Input	1000	kg	FALSE	Has_Input
[61]	Lignocellulosic LA production (Scenario 3)	Lactic acid	Lactic acid production	Lactic Acid	Output	568	kg	TRUE	Has_Output
[61]	Lignocellulosic LA production (Scenario 3)	Lactic acid	Lactic acid production	Waste water	Output	12541	kg	FALSE	Has_Output
[61]	Lignocellulosic LA production (Scenario 3)	Lactic acid	Lactic acid production	Cellu-lignin	Output	4660	kg	FALSE	Has_Output
[61]	Lignocellulosic LA production (Scenario 4)	Lactic acid	Lactic acid production	Water	Input	7423	kg	FALSE	Has_Input
[61]	Lignocellulosic LA production (Scenario 4)	Lactic acid	Lactic acid production	Strains & Nutrients	Input	2741	kg	FALSE	Has_Input
[61]	Lignocellulosic LA production (Scenario 4)	Lactic acid	Lactic acid production	Ethanol	Input	43	kg	FALSE	Has_Input
[61]	Lignocellulosic LA production (Scenario 4)	Lactic acid	Lactic acid production	STEAM	Input	1000	kg	FALSE	Has_Input
[61]	Lignocellulosic LA production (Scenario 4)	Lactic acid	Lactic acid production	Lactic Acid	Output	1085	kg	TRUE	Has_Output
[61]	Lignocellulosic LA production (Scenario 4)	Lactic acid	Lactic acid production	Waste water	Output	4566	kg	FALSE	Has_Output
[61]	Lignocellulosic LA production (Scenario 4)	Lactic acid	Lactic acid production	Hemicellulose	Output	1719	kg	FALSE	Has_Output
[61]	Lignocellulosic LA production (Scenario 5)	Lactic acid	Lactic acid production	Water	Input	11831	kg	FALSE	Has_Input
[61]	Lignocellulosic LA production (Scenario 5)	Lactic acid	Lactic acid production	Strains & Nutrients	Input	350	kg	FALSE	Has_Input
[61]	Lignocellulosic LA production (Scenario 5)	Lactic acid	Lactic acid production	Ethanol	Input	42	kg	FALSE	Has_Input
[61]	Lignocellulosic LA production (Scenario 5)	Lactic acid	Lactic acid production	STEAM	Input	1000	kg	FALSE	Has_Input
[61]	Lignocellulosic LA production (Scenario 5)	Lactic acid	Lactic acid production	Mg(OH)2	Input	71	kg	FALSE	Has_Input
[61]	Lignocellulosic LA production (Scenario 5)	Lactic acid	Lactic acid production	Triethylamine(TEA)	Input	50	kg	FALSE	Has_Input
[61]	Lignocellulosic LA production (Scenario 5)	Lactic acid	Lactic acid production	Lactic Acid	Output	1000	kg	TRUE	Has_Output
[61]	Lignocellulosic LA production (Scenario 5)	Lactic acid	Lactic acid production	Waste water	Output	15359	kg	FALSE	Has_Output
[61]	Lignocellulosic LA production (Scenario 5)	Lactic acid	Lactic acid production	Cellu-lignin	Output	4660	kg	FALSE	Has_Output
[61]	Lignocellulosic LA production (Scenario 6)	Lactic acid	Lactic acid production	Water	Input	8149	kg	FALSE	Has_Input
[61]	Lignocellulosic LA production (Scenario 6)	Lactic acid	Lactic acid production	Strains & Nutrients	Input	2742	kg	FALSE	Has_Input
[61]	Lignocellulosic LA production (Scenario 6)	Lactic acid	Lactic acid production	Ethanol	Input	48	kg	FALSE	Has_Input
[61]	Lignocellulosic LA production (Scenario 6)	Lactic acid	Lactic acid production	STEAM	Input	1000	kg	FALSE	Has_Input
[61]	Lignocellulosic LA production (Scenario 6)	Lactic acid	Lactic acid production	Mg(OH)2	Input	76	kg	FALSE	Has_Input
[61]	Lignocellulosic LA production (Scenario 6)	Lactic acid	Lactic acid production	Triethylamine(TEA)	Input	80	kg	FALSE	Has_Input
[61]	Lignocellulosic LA production (Scenario 6)	Lactic acid	Lactic acid production	Lactic Acid	Output	1640	kg	TRUE	Has_Output
[61]	Lignocellulosic LA production (Scenario 6)	Lactic acid	Lactic acid production	Waste water	Output	13458	kg	FALSE	Has_Output
[61]	Lignocellulosic LA production (Scenario 6)	Lactic acid	Lactic acid production	Hemicellulose	Output	1719	kg	FALSE	Has_Output
[62]	Lignocellulosic biomass (SCBL) -to-LA pathway	Lactic acid	Lactic acid production	Feed (SCBL)	Input	8333.33	kg	FALSE	Has_Input
[62]	Lignocellulosic biomass (SCBL) -to-LA pathway	Lactic acid	Lactic acid production	Process water	Input	14834	kg	FALSE	Has_Input
[62]	Lignocellulosic biomass (SCBL) -to-LA pathway	Lactic acid	Lactic acid production	TEA	Input	87.8	kg	FALSE	Has_Input
[62]	Lignocellulosic biomass (SCBL) -to-LA pathway	Lactic acid	Lactic acid production	Mg(OH)2	Input	194.65	kg	FALSE	Has_Input
[62]	Lignocellulosic biomass (SCBL) -to-LA pathway	Lactic acid	Lactic acid production	Ethanol	Input	49.46	kg	FALSE	Has_Input
[62]	Lignocellulosic biomass (SCBL) -to-LA pathway	Lactic acid	Lactic acid production	Strains & nutrients	Input	549.12	kg	FALSE	Has_Input
[62]	Lignocellulosic biomass (SCBL) -to-LA pathway	Lactic acid	Lactic acid production	Steam LPS	Input	1545.31	kg	FALSE	Has_Input
[62]	Lignocellulosic biomass (SCBL) -to-LA pathway	Lactic acid	Lactic acid production	Steam HPS	Input	11445.9	kg	FALSE	Has_Input
[62]	Lignocellulosic biomass (SCBL) -to-LA pathway	Lactic acid	Lactic acid production	Electricity	Input	123.84	kg	FALSE	Has_Input
[62]	Lignocellulosic biomass (SCBL) -to-LA pathway	Lactic acid	Lactic acid production	Lactic acid (LA)	Output	3624.1	kg	TRUE	Has_Output
[62]	Lignocellulosic biomass (SCBL) -to-LA pathway	Lactic acid	Lactic acid production	Solid waste	Output	4477.93	kg	FALSE	Has_Output
[62]	Lignocellulosic biomass (SCBL) -to-LA pathway	Lactic acid	Lactic acid production	Waste water	Output	13339.7	kg	FALSE	Has_Output
[63]	Sugarcane bagasse-based pathway	Lactic acid	Lactic acid production	H2SO4	Input	0.59	kg	FALSE	Has_Input
[63]	Sugarcane bagasse-based pathway	Lactic acid	Lactic acid production	Calcium lactate	Input	1.31	kg	FALSE	Has_Input
[63]	Sugarcane bagasse-based pathway	Lactic acid	Lactic acid production	Fermented broth	Input	16	kg	FALSE	Has_Input
[63]	Sugarcane bagasse-based pathway	Lactic acid	Lactic acid production	Lactic acid	Output	1.08	kg	TRUE	Has_Output
[63]	Sugarcane bagasse-based pathway	Lactic acid	Lactic acid production	Water	Output	16	kg	FALSE	Has_Output
[63]	Sugarcane bagasse-based pathway	Lactic acid	Lactic acid production	Gypsum	Output	0.82	kg	FALSE	Has_Output
[67]	Chemocatalytic production of LA from DHA (in water)	Lactic acid	Lactic acid production	DHA	Input	1.1	kg	FALSE	Has_Input
[67]	Chemocatalytic production of LA from DHA (in water)	Lactic acid	Lactic acid production	Process water	Input	6.5	kg	FALSE	Has_Input
[67]	Chemocatalytic production of LA from DHA (in water)	Lactic acid	Lactic acid production	Butanol	Input	0.02	kg	FALSE	Has_Input
[67]	Chemocatalytic production of LA from DHA (in water)	Lactic acid	Lactic acid production	Catalyst	Input	0.3	kg	FALSE	Has_Input
[67]	Chemocatalytic production of LA from DHA (in water)	Lactic acid	Lactic acid production	Steam (6 bar)	Input	18.2	MJ	FALSE	Has_Input
[67]	Chemocatalytic production of LA from DHA (in water)	Lactic acid	Lactic acid production	Cooling water	Input	434	kg	FALSE	Has_Input
[67]	Chemocatalytic production of LA from DHA (in water)	Lactic acid	Lactic acid production	Waste	Output	6.9	kg	FALSE	Has_Output
[67]	Chemocatalytic production of LA from DHA (in water)	Lactic acid	Lactic acid production	Lactic acid	Output	1	kg	TRUE	Has_Output
[67]	Chemocatalytic production of LA from DHA (in methanol)	Lactic acid	Lactic acid production	DHA	Input	1.09	kg	FALSE	Has_Input
[67]	Chemocatalytic production of LA from DHA (in methanol)	Lactic acid	Lactic acid production	Process water	Input	0.41	kg	FALSE	Has_Input
[67]	Chemocatalytic production of LA from DHA (in methanol)	Lactic acid	Lactic acid production	Methanol	Input	0.03	kg	FALSE	Has_Input
[67]	Chemocatalytic production of LA from DHA (in methanol)	Lactic acid	Lactic acid production	Catalyst	Input	0.1	kg	FALSE	Has_Input
[67]	Chemocatalytic production of LA from DHA (in methanol)	Lactic acid	Lactic acid production	Steam (6 bar)	Input	12.7	MJ	FALSE	Has_Input
[67]	Chemocatalytic production of LA from DHA (in methanol)	Lactic acid	Lactic acid production	Cooling water	Input	649	kg	FALSE	Has_Input
[67]	Chemocatalytic production of LA from DHA (in methanol)	Lactic acid	Lactic acid production	Waste	Output	0.59	kg	FALSE	Has_Output
[67]	Chemocatalytic production of LA from DHA (in methanol)	Lactic acid	Lactic acid production	Lactic acid	Output	1	kg	TRUE	Has_Output
[69]	Acrylic acid production process from propylene (case 1)	Acrylic acid	Acrylic acid production	Propylene	Input	853	kg	FALSE	Has_Input
[69]	Acrylic acid production process from propylene (case 1)	Acrylic acid	Acrylic acid production	Air	Input	899	m^3	FALSE	Has_Input
[69]	Acrylic acid production process from propylene (case 1)	Acrylic acid	Acrylic acid production	Deionized water	Input	406	kg	FALSE	Has_Input
[69]	Acrylic acid production process from propylene (case 1)	Acrylic acid	Acrylic acid production	River water	Input	828	kg	FALSE	Has_Input
[69]	Acrylic acid production process from propylene (case 1)	Acrylic acid	Acrylic acid production	Molten salt	Input	172	kg	FALSE	Has_Input
[69]	Acrylic acid production process from propylene (case 1)	Acrylic acid	Acrylic acid production	Catalyst 1	Input	0.2	kg	FALSE	Has_Input
[69]	Acrylic acid production process from propylene (case 1)	Acrylic acid	Acrylic acid production	Catalyst 2	Input	0.2	kg	FALSE	Has_Input
[69]	Acrylic acid production process from propylene (case 1)	Acrylic acid	Acrylic acid production	Cooling water	Input	659	kg	FALSE	Has_Input
[69]	Acrylic acid production process from propylene (case 1)	Acrylic acid	Acrylic acid production	Electricity used in pumps & compressors	Input	1416	MJ	FALSE	Has_Input
[69]	Acrylic acid production process from propylene (case 1)	Acrylic acid	Acrylic acid production	Acrylic acid	Output	1000	kg	TRUE	Has_Output
[69]	Acrylic acid production process from propylene (case 1)	Acrylic acid	Acrylic acid production	Acetic Acid	Output	59.1	kg	FALSE	Has_Output
[69]	Acrylic acid production process from propylene (case 1)	Acrylic acid	Acrylic acid production	Off gas Propene	Output	86	kg	FALSE	Has_Output
[69]	Acrylic acid production process from propylene (case 1)	Acrylic acid	Acrylic acid production	Water	Output	447.3	kg	FALSE	Has_Output
[69]	Acrylic acid production process from propylene (case 1)	Acrylic acid	Acrylic acid production	Oxygen	Output	248.3	kg	FALSE	Has_Output
[69]	Acrylic acid production process from propylene (case 1)	Acrylic acid	Acrylic acid production	Nitrogen	Output	4722.8	kg	FALSE	Has_Output
[69]	Acrylic acid production process from propylene (case 1)	Acrylic acid	Acrylic acid production	Acetic acid	Output	4.7	kg	FALSE	Has_Output
[69]	Acrylic acid production process from propylene (case 1)	Acrylic acid	Acrylic acid production	Acrylic acid	Output	12.03	kg	FALSE	Has_Output
[69]	Acrylic acid production process from propylene (case 1)	Acrylic acid	Acrylic acid production	CO2	Output	425	kg	FALSE	Has_Output
[69]	Acrylic acid production process from propylene (case 1)	Acrylic acid	Acrylic acid production	Water to wastewater treatment	Output	3329	kg	FALSE	Has_Output
[71]	Glycerol-to-Acrylonitrile pathway	Acrylonitrile	Acrylonitrile production	Acrolein	Input	1.35	kg	FALSE	Has_Input
[71]	Glycerol-to-Acrylonitrile pathway	Acrylonitrile	Acrylonitrile production	Natural gas	Input	0.21	kg	FALSE	Has_Input
[71]	Glycerol-to-Acrylonitrile pathway	Acrylonitrile	Acrylonitrile production	Air	Input	8.58	kg	FALSE	Has_Input
[71]	Glycerol-to-Acrylonitrile pathway	Acrylonitrile	Acrylonitrile production	Ammonia	Input	0.48	kg	FALSE	Has_Input
[71]	Glycerol-to-Acrylonitrile pathway	Acrylonitrile	Acrylonitrile production	Sulfuric acid	Input	0.19	kg	FALSE	Has_Input
[71]	Glycerol-to-Acrylonitrile pathway	Acrylonitrile	Acrylonitrile production	Deionized water	Input	2.06	kg	FALSE	Has_Input
[71]	Glycerol-to-Acrylonitrile pathway	Acrylonitrile	Acrylonitrile production	Acrylonitrile	Output	1	kg	TRUE	Has_Output
[71]	Glycerol-to-Acrylonitrile pathway	Acrylonitrile	Acrylonitrile production	Acetonitrile	Output	0.04	kg	FALSE	Has_Output
[71]	Glycerol-to-Acrylonitrile pathway	Acrylonitrile	Acrylonitrile production	Ammonium sulfate	Output	1.12	kg	FALSE	Has_Output
[71]	Glycerol-to-Acrylonitrile pathway	Acrylonitrile	Acrylonitrile production	Hydrocyanic acid	Output	0.05	kg	FALSE	Has_Output
[71]	Glycerol-to-Acrylonitrile pathway	Acrylonitrile	Acrylonitrile production	Contaminated water sent for treatment	Output	1.26	kg	FALSE	Has_Output
[71]	Glycerol-to-Acrylonitrile pathway	Acrylonitrile	Acrylonitrile production	Carbon dioxide	Output	0.17	kg	FALSE	Has_Output
[71]	Glycerol-to-Acrylonitrile pathway	Acrylonitrile	Acrylonitrile production	Nitrogen	Output	6.63	kg	FALSE	Has_Output
[71]	Glycerol-to-Acrylonitrile pathway	Acrylonitrile	Acrylonitrile production	Water	Output	0.09	kg	FALSE	Has_Output
[71]	Glycerol-to-Acrylonitrile pathway	Acrylonitrile	Acrylonitrile production	Oxygen	Output	1.59	kg	FALSE	Has_Output
[72]	Bio-SAC production	Succinic acid	Succinic acid production	Sorghum Grains	Input	1.66	kg	FALSE	Has_Input
[72]	Bio-SAC production	Succinic acid	Succinic acid production	Dextrose	Input	0.013	kg	FALSE	Has_Input
[72]	Bio-SAC production	Succinic acid	Succinic acid production	Process Water	Input	1.67	kg	FALSE	Has_Input
[72]	Bio-SAC production	Succinic acid	Succinic acid production	Cooling Water	Input	1.29	m^3	FALSE	Has_Input
[72]	Bio-SAC production	Succinic acid	Succinic acid production	Ultrapure Water	Input	25.3	kg	FALSE	Has_Input
[72]	Bio-SAC production	Succinic acid	Succinic acid production	Electricity	Input	2.67	kWh	FALSE	Has_Input
[72]	Bio-SAC production	Succinic acid	Succinic acid production	Natural Gas for steam	Input	14.77	MJ	FALSE	Has_Input
[72]	Bio-SAC production	Succinic acid	Succinic acid production	Ammonium Liquid	Input	0.41	kg	FALSE	Has_Input
[72]	Bio-SAC production	Succinic acid	Succinic acid production	Volatile Organic Compound	Output	0.002	kg	FALSE	Has_Output
[72]	Bio-SAC production	Succinic acid	Succinic acid production	Carbon Monoxide	Output	0.015	kg	FALSE	Has_Output
[72]	Bio-SAC production	Succinic acid	Succinic acid production	Nitrogen Oxide	Output	0.005	kg	FALSE	Has_Output
[72]	Bio-SAC production	Succinic acid	Succinic acid production	Particulates < 10 Âµm	Output	0.001	kg	FALSE	Has_Output
[72]	Bio-SAC production	Succinic acid	Succinic acid production	Ammonia	Output	0.000172	kg	FALSE	Has_Output
[72]	Bio-SAC production	Succinic acid	Succinic acid production	Lead	Output	5.2e-06	kg	FALSE	Has_Output
[72]	Bio-SAC production	Succinic acid	Succinic acid production	Sulfuric Acid	Output	8.06e-05	kg	FALSE	Has_Output
[72]	Bio-SAC production	Succinic acid	Succinic acid production	Waste Water	Output	0.011	m^3	FALSE	Has_Output
[72]	Bio-SAC production	Succinic acid	Succinic acid production	Cell Mass	Output	0.82	kg	FALSE	Has_Output
[72]	Bio-SAC production	Succinic acid	Succinic acid production	Sorghum Grain Waste	Output	0.395	kg	FALSE	Has_Output
[72]	Bio-SAC production	Succinic acid	Succinic acid production	Succinic acid	Output	1	kg	TRUE	Has_Output
[73]	Giant reed bio-based SA (GR bio-SA)	Succinic acid	Succinic acid production	Giant reed biomass	Input	2.7	kg	FALSE	Has_Input
[73]	Giant reed bio-based SA (GR bio-SA)	Succinic acid	Succinic acid production	Water	Input	32	kg	FALSE	Has_Input
[73]	Giant reed bio-based SA (GR bio-SA)	Succinic acid	Succinic acid production	Nutrients and other organic/inorganic chemicals	Input	1.1	kg	FALSE	Has_Input
[73]	Giant reed bio-based SA (GR bio-SA)	Succinic acid	Succinic acid production	Total energy consumption	Input	15	MJ	FALSE	Has_Input
[73]	Giant reed bio-based SA (GR bio-SA)	Succinic acid	Succinic acid production	Succinic acid	Output	1	kg	TRUE	Has_Output
[73]	Giant reed bio-based SA (GR bio-SA)	Succinic acid	Succinic acid production	Waste water to WWTP	Output	0.03	kg	FALSE	Has_Output
[73]	Giant reed bio-based SA (GR bio-SA)	Succinic acid	Succinic acid production	Sludge	Output	0.004	kg	FALSE	Has_Output
[74]	SA production from sugarcane	Succinic acid	Succinic acid production	Air	Input	58	kg	FALSE	Has_Input
[74]	SA production from sugarcane	Succinic acid	Succinic acid production	Sugarcane Juice	Input	15.6	kg	FALSE	Has_Input
[74]	SA production from sugarcane	Succinic acid	Succinic acid production	Water, decarbonised	Input	74	kg	FALSE	Has_Input
[74]	SA production from sugarcane	Succinic acid	Succinic acid production	Sodium hydroxide, without water, in 50% solution state	Input	0.0156	kg	FALSE	Has_Input
[74]	SA production from sugarcane	Succinic acid	Succinic acid production	Zeolite, powder	Input	0.00043	kg	FALSE	Has_Input
[74]	SA production from sugarcane	Succinic acid	Succinic acid production	Ammonia, anhydrous, liquid	Input	0.0151	kg	FALSE	Has_Input
[74]	SA production from sugarcane	Succinic acid	Succinic acid production	Electricity, high voltage	Input	1.19	kWh	FALSE	Has_Input
[74]	SA production from sugarcane	Succinic acid	Succinic acid production	Heat, district or industrial, other than natural gas	Input	11.8	MJ	FALSE	Has_Input
[74]	SA production from sugarcane	Succinic acid	Succinic acid production	Succinic acid	Output	1	kg	TRUE	Has_Output
[74]	SA production from sorghum	Succinic acid	Succinic acid production	Water, unspecified natural origin	Input	1.29	m^3	FALSE	Has_Input
[74]	SA production from sorghum	Succinic acid	Succinic acid production	Grain sorghum, at farm	Input	1.66	kg	FALSE	Has_Input
[74]	SA production from sorghum	Succinic acid	Succinic acid production	Glucose	Input	0.013	kg	FALSE	Has_Input
[74]	SA production from sorghum	Succinic acid	Succinic acid production	Water, decarbonised	Input	1.67	kg	FALSE	Has_Input
[74]	SA production from sorghum	Succinic acid	Succinic acid production	Water, ultrapure	Input	25.3	kg	FALSE	Has_Input
[74]	SA production from sorghum	Succinic acid	Succinic acid production	Ammonia, anhydrous, liquid	Input	0.41	kg	FALSE	Has_Input
[74]	SA production from sorghum	Succinic acid	Succinic acid production	Heat, from steam, in chemical industry	Input	14.8	MJ	FALSE	Has_Input
[74]	SA production from sorghum	Succinic acid	Succinic acid production	Electricity, medium voltage	Input	2.67	kWh	FALSE	Has_Input
[74]	SA production from sorghum	Succinic acid	Succinic acid production	Transport, freight, lorry >32 metric ton, EURO1	Input	0.0498	tkm	FALSE	Has_Input
[74]	SA production from sorghum	Succinic acid	Succinic acid production	Succinic Acid	Output	1	kg	TRUE	Has_Output
[74]	SA production from sorghum	Succinic acid	Succinic acid production	Ammonium sulfate	Output	1.49	kg	FALSE	Has_Output
[74]	SA production from sorghum	Succinic acid	Succinic acid production	Organic substances, unspecified	Output	0.002	kg	FALSE	Has_Output
[74]	SA production from sorghum	Succinic acid	Succinic acid production	Carbon monoxide	Output	0.015	kg	FALSE	Has_Output
[74]	SA production from sorghum	Succinic acid	Succinic acid production	Nitrogen oxides	Output	0.005	kg	FALSE	Has_Output
[74]	SA production from sorghum	Succinic acid	Succinic acid production	Particulates	Output	0.005	kg	FALSE	Has_Output
[74]	SA production from sorghum	Succinic acid	Succinic acid production	Ammonia	Output	0.000172	kg	FALSE	Has_Output
[74]	SA production from sorghum	Succinic acid	Succinic acid production	Lead	Output	5.2e-06	kg	FALSE	Has_Output
[74]	SA production from sorghum	Succinic acid	Succinic acid production	Sulfuric acid	Output	8.06e-05	kg	FALSE	Has_Output
[74]	SA production from sorghum	Succinic acid	Succinic acid production	Waste water	Output	11	kg	FALSE	Has_Output
[74]	SA production from sorghum	Succinic acid	Succinic acid production	Waste, organic	Output	1.22	kg	FALSE	Has_Output
[74]	SA production from apple pomace	Succinic acid	Succinic acid production	Tap water	Input	0.0229	kg	FALSE	Has_Input
[74]	SA production from apple pomace	Succinic acid	Succinic acid production	Glucose	Input	0.0593	kg	FALSE	Has_Input
[74]	SA production from apple pomace	Succinic acid	Succinic acid production	Corn steep liquor	Input	0.0148	kg	FALSE	Has_Input
[74]	SA production from apple pomace	Succinic acid	Succinic acid production	Carbon dioxide, in chemical industry	Input	0.0125	kg	FALSE	Has_Input
[74]	SA production from apple pomace	Succinic acid	Succinic acid production	Chemical, inorganic	Input	0.25	kg	FALSE	Has_Input
[74]	SA production from apple pomace	Succinic acid	Succinic acid production	Sodium chloride, powder	Input	0.251	kg	FALSE	Has_Input
[74]	SA production from apple pomace	Succinic acid	Succinic acid production	Sulfuric acid	Input	0.831	kg	FALSE	Has_Input
[74]	SA production from apple pomace	Succinic acid	Succinic acid production	Natural gas liquids	Input	0.312	kg	FALSE	Has_Input
[74]	SA production from apple pomace	Succinic acid	Succinic acid production	Enzymes	Input	0.0135	kg	FALSE	Has_Input
[74]	SA production from apple pomace	Succinic acid	Succinic acid production	Chemical, organic	Input	0.047	kg	FALSE	Has_Input
[74]	SA production from apple pomace	Succinic acid	Succinic acid production	Electricity, medium voltage	Input	0.0787	kWh	FALSE	Has_Input
[74]	SA production from apple pomace	Succinic acid	Succinic acid production	Transport, freight, lorry >32 metric ton, EURO1	Input	0.054	tkm	FALSE	Has_Input
[74]	SA production from apple pomace	Succinic acid	Succinic acid production	Succinic Acid	Output	1	kg	TRUE	Has_Output
[74]	SA production from apple pomace	Succinic acid	Succinic acid production	Methane	Output	3.56e-05	kg	FALSE	Has_Output
[74]	SA production from apple pomace	Succinic acid	Succinic acid production	Carbon monoxide	Output	0.000533	kg	FALSE	Has_Output
[74]	SA production from apple pomace	Succinic acid	Succinic acid production	Ethanol	Output	2.68e-06	kg	FALSE	Has_Output
[74]	SA production from apple pomace	Succinic acid	Succinic acid production	Nitrogen monoxide	Output	8.89e-06	kg	FALSE	Has_Output
[74]	SA production from apple pomace	Succinic acid	Succinic acid production	Sulfur oxides	Output	9.79e-06	kg	FALSE	Has_Output
[74]	SA production from apple pomace	Succinic acid	Succinic acid production	Particulates	Output	1.78e-06	kg	FALSE	Has_Output
[74]	SA production from apple pomace	Succinic acid	Succinic acid production	Nitrogen oxides	Output	0.000356	kg	FALSE	Has_Output
[74]	SA production from apple pomace	Succinic acid	Succinic acid production	Waste water	Output	0.0241	kg	FALSE	Has_Output
[74]	SA production from apple pomace	Succinic acid	Succinic acid production	Waste, unspecified	Output	0.885	kg	FALSE	Has_Output
[74]	SA production from maleic anhydride	Succinic acid	Succinic acid production	Water, unspecified natural origin, BR-Southern grid	Input	0.01809	m^3	FALSE	Has_Input
[74]	SA production from maleic anhydride	Succinic acid	Succinic acid production	Maleic Anhydride	Input	0.874	kg	FALSE	Has_Input
[74]	SA production from maleic anhydride	Succinic acid	Succinic acid production	Hydrogen, gaseous	Input	0.018	kg	FALSE	Has_Input
[74]	SA production from maleic anhydride	Succinic acid	Succinic acid production	Water, decarbonised	Input	0.187	kg	FALSE	Has_Input
[74]	SA production from maleic anhydride	Succinic acid	Succinic acid production	Metal catalyst for catalytic converter	Input	4.97e-05	kg	FALSE	Has_Input
[74]	SA production from maleic anhydride	Succinic acid	Succinic acid production	Nitrogen, liquid	Input	0.019	kg	FALSE	Has_Input
[74]	SA production from maleic anhydride	Succinic acid	Succinic acid production	Electricity, medium voltage	Input	0.416	kWh	FALSE	Has_Input
[74]	SA production from maleic anhydride	Succinic acid	Succinic acid production	Heat, district or industrial, natural gas	Input	2.35	MJ	FALSE	Has_Input
[74]	SA production from maleic anhydride	Succinic acid	Succinic acid production	Succinic Acid	Output	1	kg	TRUE	Has_Output
[74]	SA production from maleic anhydride	Succinic acid	Succinic acid production	Carbon dioxide, fossil	Output	0.0745	kg	FALSE	Has_Output
[74]	SA production from maleic anhydride	Succinic acid	Succinic acid production	Hydrogen	Output	0.000898	kg	FALSE	Has_Output
[74]	SA production from maleic anhydride	Succinic acid	Succinic acid production	Nitrogen, atmospheric	Output	0.019	kg	FALSE	Has_Output
[74]	SA production from maleic anhydride	Succinic acid	Succinic acid production	Water/m3	Output	0.0167	m^3	FALSE	Has_Output
[74]	SA production from maleic anhydride	Succinic acid	Succinic acid production	Maleic anhydride	Output	0.00219	kg	FALSE	Has_Output
[74]	SA production from maleic anhydride	Succinic acid	Succinic acid production	Water, BR-South-eastern grid	Output	0.0167	m^3	FALSE	Has_Output
[74]	SA production from maleic anhydride	Succinic acid	Succinic acid production	Wastewater	Output	2.74e-06	m^3	FALSE	Has_Output
[75]	Bread waste-based pathway	Succinic acid	Succinic acid production	Hydrochloric acid	Input	0.079	kg	FALSE	Has_Input
[75]	Bread waste-based pathway	Succinic acid	Succinic acid production	Magnesium carbonate	Input	0.273	kg	FALSE	Has_Input
[75]	Bread waste-based pathway	Succinic acid	Succinic acid production	Sodium hydroxide	Input	0.197	kg	FALSE	Has_Input
[75]	Bread waste-based pathway	Succinic acid	Succinic acid production	NaCl brine	Input	15.007	kg	FALSE	Has_Input
[75]	Bread waste-based pathway	Succinic acid	Succinic acid production	Enzyme, Glucoamylase	Input	0.007	kg	FALSE	Has_Input
[75]	Bread waste-based pathway	Succinic acid	Succinic acid production	Steam	Input	40.531	kg	FALSE	Has_Input
[75]	Bread waste-based pathway	Succinic acid	Succinic acid production	Electricity	Input	1.01	kWh	FALSE	Has_Input
[75]	Bread waste-based pathway	Succinic acid	Succinic acid production	Heating oil	Input	3.385	kg	FALSE	Has_Input
[75]	Bread waste-based pathway	Succinic acid	Succinic acid production	Process water	Input	117.142	kg	FALSE	Has_Input
[75]	Bread waste-based pathway	Succinic acid	Succinic acid production	Energy for CO2 capture, compression and storage	Input	0.1	kWh	FALSE	Has_Input
[75]	Bread waste-based pathway	Succinic acid	Succinic acid production	Succinic acid	Output	1	kg	TRUE	Has_Output
[75]	Bread waste-based pathway	Succinic acid	Succinic acid production	Solid biomass (fish feed)	Output	10.639	kg	FALSE	Has_Output
[75]	Bread waste-based pathway	Succinic acid	Succinic acid production	Nitrogen oxides	Output	2.223	g	FALSE	Has_Output
[75]	Bread waste-based pathway	Succinic acid	Succinic acid production	Ammonia	Output	0.279	g	FALSE	Has_Output
[75]	Bread waste-based pathway	Succinic acid	Succinic acid production	Sulfur dioxide	Output	2.264	g	FALSE	Has_Output
[75]	Bread waste-based pathway	Succinic acid	Succinic acid production	Carbon dioxide, fossil	Output	722.46	g	FALSE	Has_Output
[75]	Bread waste-based pathway	Succinic acid	Succinic acid production	Carbon dioxide, biogenic	Output	36.123	g	FALSE	Has_Output
[75]	Bread waste-based pathway	Succinic acid	Succinic acid production	Methane, fossil	Output	3.717	g	FALSE	Has_Output
[75]	Bread waste-based pathway	Succinic acid	Succinic acid production	Methane, biogenic	Output	0.041	g	FALSE	Has_Output
[75]	Bread waste-based pathway	Succinic acid	Succinic acid production	Chromium VI	Output	0.074	mg	FALSE	Has_Output
[75]	Bread waste-based pathway	Succinic acid	Succinic acid production	Arsenic	Output	0.477	mg	FALSE	Has_Output
[75]	Bread waste-based pathway	Succinic acid	Succinic acid production	PAH	Output	0.421	mg	FALSE	Has_Output
[77]	Electrochemical membrane bioreactor (EMB)-based pathway	Succinic acid	Succinic acid production	NaOH	Input	0.28	kg	FALSE	Has_Input
[77]	Electrochemical membrane bioreactor (EMB)-based pathway	Succinic acid	Succinic acid production	Yeast extract	Input	0.27	kg	FALSE	Has_Input
[77]	Electrochemical membrane bioreactor (EMB)-based pathway	Succinic acid	Succinic acid production	Process water	Input	4.749	kg	FALSE	Has_Input
[77]	Electrochemical membrane bioreactor (EMB)-based pathway	Succinic acid	Succinic acid production	Electricity	Input	7.656	kWh	FALSE	Has_Input
[77]	Electrochemical membrane bioreactor (EMB)-based pathway	Succinic acid	Succinic acid production	Steam	Input	2.442	kg	FALSE	Has_Input
[77]	Electrochemical membrane bioreactor (EMB)-based pathway	Succinic acid	Succinic acid production	Cooling water	Input	0.188	kg	FALSE	Has_Input
[77]	Electrochemical membrane bioreactor (EMB)-based pathway	Succinic acid	Succinic acid production	Succinic acid	Output	1	kg	TRUE	Has_Output
[81]	EtOH-based pathway (reaction with NaOH)	Butanol	n-butanol production	NaOH	Input	0.82	kg	FALSE	Has_Input
[81]	EtOH-based pathway (reaction with NaOH)	Butanol	n-butanol production	Ruthenium	Input	0.015	kg	FALSE	Has_Input
[81]	EtOH-based pathway (reaction with NaOH)	Butanol	n-butanol production	Specific heat duty	Input	12.6	MJ	FALSE	Has_Input
[81]	EtOH-based pathway (reaction with NaOH)	Butanol	n-butanol production	Total electric consumption	Input	1.4	MJ	FALSE	Has_Input
[81]	EtOH-based pathway (reaction with NaOH)	Butanol	n-butanol production	Hydrocarbons	Output	0.000305	m^3	FALSE	Has_Output
[81]	EtOH-based pathway (reaction with NaOH)	Butanol	n-butanol production	CO2 from catalyst production	Output	2.5	kg	FALSE	Has_Output
[81]	EtOH-based pathway (reaction with NaOH)	Butanol	n-butanol production	CO2 from combustion of residues	Output	4.07	kg	FALSE	Has_Output
[81]	EtOH-based pathway (reaction with NaOH)	Butanol	n-butanol production	NaOAc	Output	1.69	kg	FALSE	Has_Output
[81]	EtOH-based pathway (reaction with NaOH)	Butanol	n-butanol production	Reaction water	Output	1.22	L	FALSE	Has_Output
[81]	EtOH-based pathway (reaction with NaOH)	Butanol	n-butanol production	Butanol	Output	1	kg	TRUE	Has_Output
[81]	EtOH-based pathway (reaction with NaOEt)	Butanol	n-butanol production	NaOEt	Input	1.17	kg	FALSE	Has_Input
[81]	EtOH-based pathway (reaction with NaOEt)	Butanol	n-butanol production	Ruthenium	Input	0.015	kg	FALSE	Has_Input
[81]	EtOH-based pathway (reaction with NaOEt)	Butanol	n-butanol production	Specific heat duty	Input	11.4	MJ	FALSE	Has_Input
[81]	EtOH-based pathway (reaction with NaOEt)	Butanol	n-butanol production	Total electric consumption	Input	1.28	MJ	FALSE	Has_Input
[81]	EtOH-based pathway (reaction with NaOEt)	Butanol	n-butanol production	Hydrocarbons	Output	0.000379	m^3	FALSE	Has_Output
[81]	EtOH-based pathway (reaction with NaOEt)	Butanol	n-butanol production	CO2 from catalyst production	Output	2.5	kg	FALSE	Has_Output
[81]	EtOH-based pathway (reaction with NaOEt)	Butanol	n-butanol production	CO2 from combustion of residues	Output	0.26	kg	FALSE	Has_Output
[81]	EtOH-based pathway (reaction with NaOEt)	Butanol	n-butanol production	NaOAc	Output	1.43	kg	FALSE	Has_Output
[81]	EtOH-based pathway (reaction with NaOEt)	Butanol	n-butanol production	Butanol	Output	1	kg	TRUE	Has_Output
[83]	Bioethanol-to-1,3-BD pathway (scenario B1)	1,3-Butadiene	1,3-Butadiene production	Air	Input	17.3	tonne	FALSE	Has_Input
[83]	Bioethanol-to-1,3-BD pathway (scenario B1)	1,3-Butadiene	1,3-Butadiene production	Hafnium	Input	1.21e-05	tonne	FALSE	Has_Input
[83]	Bioethanol-to-1,3-BD pathway (scenario B1)	1,3-Butadiene	1,3-Butadiene production	Ethanol, 93%	Input	3.2202	tonne	FALSE	Has_Input
[83]	Bioethanol-to-1,3-BD pathway (scenario B1)	1,3-Butadiene	1,3-Butadiene production	Water, completely softened	Input	0.5754	tonne	FALSE	Has_Input
[83]	Bioethanol-to-1,3-BD pathway (scenario B1)	1,3-Butadiene	1,3-Butadiene production	N,N-dimethylformamide	Input	0.0009	tonne	FALSE	Has_Input
[83]	Bioethanol-to-1,3-BD pathway (scenario B1)	1,3-Butadiene	1,3-Butadiene production	Natural gas, high pressure	Input	1.0503	m^3	FALSE	Has_Input
[83]	Bioethanol-to-1,3-BD pathway (scenario B1)	1,3-Butadiene	1,3-Butadiene production	Zeolite, powder	Input	0.0051	tonne	FALSE	Has_Input
[83]	Bioethanol-to-1,3-BD pathway (scenario B1)	1,3-Butadiene	1,3-Butadiene production	Petrol, unleaded	Input	0.0032	tonne	FALSE	Has_Input
[83]	Bioethanol-to-1,3-BD pathway (scenario B1)	1,3-Butadiene	1,3-Butadiene production	Hydrogen peroxide, 50%	Input	0.4162	tonne	FALSE	Has_Input
[83]	Bioethanol-to-1,3-BD pathway (scenario B1)	1,3-Butadiene	1,3-Butadiene production	Copper oxide	Input	0.0003	tonne	FALSE	Has_Input
[83]	Bioethanol-to-1,3-BD pathway (scenario B1)	1,3-Butadiene	1,3-Butadiene production	Silica sand	Input	0.000353	tonne	FALSE	Has_Input
[83]	Bioethanol-to-1,3-BD pathway (scenario B1)	1,3-Butadiene	1,3-Butadiene production	Nitric acid, 50%	Input	7.21e-05	tonne	FALSE	Has_Input
[83]	Bioethanol-to-1,3-BD pathway (scenario B1)	1,3-Butadiene	1,3-Butadiene production	Zinc	Input	3.74e-05	tonne	FALSE	Has_Input
[83]	Bioethanol-to-1,3-BD pathway (scenario B1)	1,3-Butadiene	1,3-Butadiene production	Chlorine, gaseous	Input	9.59e-06	tonne	FALSE	Has_Input
[83]	Bioethanol-to-1,3-BD pathway (scenario B1)	1,3-Butadiene	1,3-Butadiene production	Carbon black	Input	8.11e-07	tonne	FALSE	Has_Input
[83]	Bioethanol-to-1,3-BD pathway (scenario B1)	1,3-Butadiene	1,3-Butadiene production	Electricity, medium voltage	Input	1034.05	kWh	FALSE	Has_Input
[83]	Bioethanol-to-1,3-BD pathway (scenario B1)	1,3-Butadiene	1,3-Butadiene production	Steam, in chemical industry	Input	0.7618	tonne	FALSE	Has_Input
[83]	Bioethanol-to-1,3-BD pathway (scenario B1)	1,3-Butadiene	1,3-Butadiene production	Water, completely softened (for steam)	Input	11.4552	tonne	FALSE	Has_Input
[83]	Bioethanol-to-1,3-BD pathway (scenario B1)	1,3-Butadiene	1,3-Butadiene production	1,3-Butadiene	Output	1	tonne	TRUE	Has_Output
[83]	Bioethanol-to-1,3-BD pathway (scenario B1)	1,3-Butadiene	1,3-Butadiene production	Water	Output	0.9108	tonne	FALSE	Has_Output
[83]	Bioethanol-to-1,3-BD pathway (scenario B1)	1,3-Butadiene	1,3-Butadiene production	Oxygen	Output	2.0756	tonne	FALSE	Has_Output
[83]	Bioethanol-to-1,3-BD pathway (scenario B1)	1,3-Butadiene	1,3-Butadiene production	Nitrogen, atmospheric	Output	13.2669	tonne	FALSE	Has_Output
[83]	Bioethanol-to-1,3-BD pathway (scenario B1)	1,3-Butadiene	1,3-Butadiene production	Carbon dioxide, fossil	Output	0.4588	tonne	FALSE	Has_Output
[83]	Bioethanol-to-1,3-BD pathway (scenario B1)	1,3-Butadiene	1,3-Butadiene production	Carbon dioxide, biogenic	Output	1.2094	tonne	FALSE	Has_Output
[83]	Bioethanol-to-1,3-BD pathway (scenario B1)	1,3-Butadiene	1,3-Butadiene production	Waste zeolite	Output	0.0051	tonne	FALSE	Has_Output
[83]	Bioethanol-to-1,3-BD pathway (scenario B1)	1,3-Butadiene	1,3-Butadiene production	Hazardous waste, for underground deposit	Output	0.0004	tonne	FALSE	Has_Output
[83]	Bioethanol-to-1,3-BD pathway (scenario B1)	1,3-Butadiene	1,3-Butadiene production	Wastewater from vegetable oil refinery	Output	2.4696	tonne	FALSE	Has_Output
[83]	Bioethanol-to-1,3-BD pathway (scenario B1)	1,3-Butadiene	1,3-Butadiene production	Wastewater, average, treatment of, capacity 1E9l/year	Output	4.0018	m^3	FALSE	Has_Output
[83]	Bioethanol-to-1,3-BD pathway (scenario B2)	1,3-Butadiene	1,3-Butadiene production	Air	Input	8.9813	tonne	FALSE	Has_Input
[83]	Bioethanol-to-1,3-BD pathway (scenario B2)	1,3-Butadiene	1,3-Butadiene production	Hafnium	Input	1.67e-05	tonne	FALSE	Has_Input
[83]	Bioethanol-to-1,3-BD pathway (scenario B2)	1,3-Butadiene	1,3-Butadiene production	Ethanol, 93%	Input	2.6904	tonne	FALSE	Has_Input
[83]	Bioethanol-to-1,3-BD pathway (scenario B2)	1,3-Butadiene	1,3-Butadiene production	Water, completely softened	Input	0.4319	tonne	FALSE	Has_Input
[83]	Bioethanol-to-1,3-BD pathway (scenario B2)	1,3-Butadiene	1,3-Butadiene production	N,N-dimethylformamide	Input	0.0009	tonne	FALSE	Has_Input
[83]	Bioethanol-to-1,3-BD pathway (scenario B2)	1,3-Butadiene	1,3-Butadiene production	Natural gas, high pressure	Input	0.8825	m^3	FALSE	Has_Input
[83]	Bioethanol-to-1,3-BD pathway (scenario B2)	1,3-Butadiene	1,3-Butadiene production	Zeolite, powder	Input	0.0053	tonne	FALSE	Has_Input
[83]	Bioethanol-to-1,3-BD pathway (scenario B2)	1,3-Butadiene	1,3-Butadiene production	Petrol, unleaded	Input	0.0014	tonne	FALSE	Has_Input
[83]	Bioethanol-to-1,3-BD pathway (scenario B2)	1,3-Butadiene	1,3-Butadiene production	Hydrogen peroxide, 50%	Input	0.1502	tonne	FALSE	Has_Input
[83]	Bioethanol-to-1,3-BD pathway (scenario B2)	1,3-Butadiene	1,3-Butadiene production	Copper oxide	Input	0.0001	tonne	FALSE	Has_Input
[83]	Bioethanol-to-1,3-BD pathway (scenario B2)	1,3-Butadiene	1,3-Butadiene production	Silica sand	Input	0.000487	tonne	FALSE	Has_Input
[83]	Bioethanol-to-1,3-BD pathway (scenario B2)	1,3-Butadiene	1,3-Butadiene production	Nitric acid, 50%	Input	0.000199	tonne	FALSE	Has_Input
[83]	Bioethanol-to-1,3-BD pathway (scenario B2)	1,3-Butadiene	1,3-Butadiene production	Zinc	Input	5.16e-05	tonne	FALSE	Has_Input
[83]	Bioethanol-to-1,3-BD pathway (scenario B2)	1,3-Butadiene	1,3-Butadiene production	Chlorine, gaseous	Input	1.32e-05	tonne	FALSE	Has_Input
[83]	Bioethanol-to-1,3-BD pathway (scenario B2)	1,3-Butadiene	1,3-Butadiene production	Carbon black	Input	1.12e-06	tonne	FALSE	Has_Input
[83]	Bioethanol-to-1,3-BD pathway (scenario B2)	1,3-Butadiene	1,3-Butadiene production	Electricity, medium voltage	Input	823.07	kWh	FALSE	Has_Input
[83]	Bioethanol-to-1,3-BD pathway (scenario B2)	1,3-Butadiene	1,3-Butadiene production	Steam, in chemical industry	Input	2.3509	tonne	FALSE	Has_Input
[83]	Bioethanol-to-1,3-BD pathway (scenario B2)	1,3-Butadiene	1,3-Butadiene production	Water, completely softened (for steam)	Input	7.842	tonne	FALSE	Has_Input
[83]	Bioethanol-to-1,3-BD pathway (scenario B2)	1,3-Butadiene	1,3-Butadiene production	1,3-Butadiene	Output	1	tonne	TRUE	Has_Output
[83]	Bioethanol-to-1,3-BD pathway (scenario B2)	1,3-Butadiene	1,3-Butadiene production	Water (emission to air)	Output	0.5577	tonne	FALSE	Has_Output
[83]	Bioethanol-to-1,3-BD pathway (scenario B2)	1,3-Butadiene	1,3-Butadiene production	Oxygen	Output	0.9798	tonne	FALSE	Has_Output
[83]	Bioethanol-to-1,3-BD pathway (scenario B2)	1,3-Butadiene	1,3-Butadiene production	Nitrogen, atmospheric	Output	6.8894	tonne	FALSE	Has_Output
[83]	Bioethanol-to-1,3-BD pathway (scenario B2)	1,3-Butadiene	1,3-Butadiene production	Carbon dioxide, fossil	Output	0.3855	tonne	FALSE	Has_Output
[83]	Bioethanol-to-1,3-BD pathway (scenario B2)	1,3-Butadiene	1,3-Butadiene production	Carbon dioxide, biogenic	Output	0.5438	tonne	FALSE	Has_Output
[83]	Bioethanol-to-1,3-BD pathway (scenario B2)	1,3-Butadiene	1,3-Butadiene production	Waste zeolite	Output	0.0053	tonne	FALSE	Has_Output
[83]	Bioethanol-to-1,3-BD pathway (scenario B2)	1,3-Butadiene	1,3-Butadiene production	Hazardous waste, for underground deposit	Output	0.0006	tonne	FALSE	Has_Output
[83]	Bioethanol-to-1,3-BD pathway (scenario B2)	1,3-Butadiene	1,3-Butadiene production	Wastewater from vegetable oil refinery	Output	1.761	tonne	FALSE	Has_Output
[83]	Bioethanol-to-1,3-BD pathway (scenario B2)	1,3-Butadiene	1,3-Butadiene production	Wastewater, average, treatment of, capacity 1E9l/year	Output	2.6948	m^3	FALSE	Has_Output
[84]	One-step bioethanol conversion pathway (scenario B1)	1,3-Butadiene	1,3-Butadiene production	Ethanol (93 wt%)	Input	3.22	t	FALSE	Has_Input
[84]	One-step bioethanol conversion pathway (scenario B1)	1,3-Butadiene	1,3-Butadiene production	Octane	Input	0.003	t	FALSE	Has_Input
[84]	One-step bioethanol conversion pathway (scenario B1)	1,3-Butadiene	1,3-Butadiene production	Water	Input	0.575	t	FALSE	Has_Input
[84]	One-step bioethanol conversion pathway (scenario B1)	1,3-Butadiene	1,3-Butadiene production	DMF	Input	0.001	t	FALSE	Has_Input
[84]	One-step bioethanol conversion pathway (scenario B1)	1,3-Butadiene	1,3-Butadiene production	Electricity	Input	500.7	kWh	FALSE	Has_Input
[84]	One-step bioethanol conversion pathway (scenario B1)	1,3-Butadiene	1,3-Butadiene production	1,3-BD	Output	1	t	TRUE	Has_Output
[84]	One-step bioethanol conversion pathway (scenario B1)	1,3-Butadiene	1,3-Butadiene production	Butenes	Output	0.097	t	FALSE	Has_Output
[84]	One-step bioethanol conversion pathway (scenario B1)	1,3-Butadiene	1,3-Butadiene production	Ethylene	Output	0.155	t	FALSE	Has_Output
[84]	One-step bioethanol conversion pathway (scenario B1)	1,3-Butadiene	1,3-Butadiene production	Propylene	Output	0.054	t	FALSE	Has_Output
[84]	One-step bioethanol conversion pathway (scenario B1)	1,3-Butadiene	1,3-Butadiene production	Acetaldehyde	Output	0.127	t	FALSE	Has_Output
[84]	One-step bioethanol conversion pathway (scenario B1)	1,3-Butadiene	1,3-Butadiene production	Hydrogen	Output	0.047	t	FALSE	Has_Output
[84]	One-step bioethanol conversion pathway (scenario B1)	1,3-Butadiene	1,3-Butadiene production	Residual fuel streams	Output	0.46	t	FALSE	Has_Output
[84]	One-step bioethanol conversion pathway (scenario B1)	1,3-Butadiene	1,3-Butadiene production	Wastewater	Output	1.861	t	FALSE	Has_Output
[84]	One-step bioethanol conversion pathway (scenario B2)	1,3-Butadiene	1,3-Butadiene production	Ethanol (93 wt%)	Input	2.69	t	FALSE	Has_Input
[84]	One-step bioethanol conversion pathway (scenario B2)	1,3-Butadiene	1,3-Butadiene production	Octane	Input	0.001	t	FALSE	Has_Input
[84]	One-step bioethanol conversion pathway (scenario B2)	1,3-Butadiene	1,3-Butadiene production	Water	Input	0.432	t	FALSE	Has_Input
[84]	One-step bioethanol conversion pathway (scenario B2)	1,3-Butadiene	1,3-Butadiene production	DMF	Input	0.001	t	FALSE	Has_Input
[84]	One-step bioethanol conversion pathway (scenario B2)	1,3-Butadiene	1,3-Butadiene production	Electricity	Input	344.6	kWh	FALSE	Has_Input
[84]	One-step bioethanol conversion pathway (scenario B2)	1,3-Butadiene	1,3-Butadiene production	1,3-BD	Output	1	t	TRUE	Has_Output
[84]	One-step bioethanol conversion pathway (scenario B2)	1,3-Butadiene	1,3-Butadiene production	Butenes	Output	0.062	t	FALSE	Has_Output
[84]	One-step bioethanol conversion pathway (scenario B2)	1,3-Butadiene	1,3-Butadiene production	Ethylene	Output	0.197	t	FALSE	Has_Output
[84]	One-step bioethanol conversion pathway (scenario B2)	1,3-Butadiene	1,3-Butadiene production	Propylene	Output	0.049	t	FALSE	Has_Output
[84]	One-step bioethanol conversion pathway (scenario B2)	1,3-Butadiene	1,3-Butadiene production	Acetaldehyde	Output	0	t	FALSE	Has_Output
[84]	One-step bioethanol conversion pathway (scenario B2)	1,3-Butadiene	1,3-Butadiene production	Hydrogen	Output	0.042	t	FALSE	Has_Output
[84]	One-step bioethanol conversion pathway (scenario B2)	1,3-Butadiene	1,3-Butadiene production	Residual fuel streams	Output	0.235	t	FALSE	Has_Output
[84]	One-step bioethanol conversion pathway (scenario B2)	1,3-Butadiene	1,3-Butadiene production	Wastewater	Output	1.539	t	FALSE	Has_Output
[84]	Two-step bioethanol conversion pathway (scenario B3)	1,3-Butadiene	1,3-Butadiene production	Ethanol (93 wt%)	Input	2.425	t	FALSE	Has_Input
[84]	Two-step bioethanol conversion pathway (scenario B3)	1,3-Butadiene	1,3-Butadiene production	Octane	Input	0.036	t	FALSE	Has_Input
[84]	Two-step bioethanol conversion pathway (scenario B3)	1,3-Butadiene	1,3-Butadiene production	Water	Input	0	t	FALSE	Has_Input
[84]	Two-step bioethanol conversion pathway (scenario B3)	1,3-Butadiene	1,3-Butadiene production	DMF	Input	0.001	t	FALSE	Has_Input
[84]	Two-step bioethanol conversion pathway (scenario B3)	1,3-Butadiene	1,3-Butadiene production	Electricity	Input	656.6	kWh	FALSE	Has_Input
[84]	Two-step bioethanol conversion pathway (scenario B3)	1,3-Butadiene	1,3-Butadiene production	1,3-BD	Output	1	t	TRUE	Has_Output
[84]	Two-step bioethanol conversion pathway (scenario B3)	1,3-Butadiene	1,3-Butadiene production	Butenes	Output	0.04	t	FALSE	Has_Output
[84]	Two-step bioethanol conversion pathway (scenario B3)	1,3-Butadiene	1,3-Butadiene production	Ethylene	Output	0.035	t	FALSE	Has_Output
[84]	Two-step bioethanol conversion pathway (scenario B3)	1,3-Butadiene	1,3-Butadiene production	Propylene	Output	0.015	t	FALSE	Has_Output
[84]	Two-step bioethanol conversion pathway (scenario B3)	1,3-Butadiene	1,3-Butadiene production	Acetaldehyde	Output	0	t	FALSE	Has_Output
[84]	Two-step bioethanol conversion pathway (scenario B3)	1,3-Butadiene	1,3-Butadiene production	Hydrogen	Output	0.04	t	FALSE	Has_Output
[84]	Two-step bioethanol conversion pathway (scenario B3)	1,3-Butadiene	1,3-Butadiene production	Residual fuel streams	Output	0.381	t	FALSE	Has_Output
[84]	Two-step bioethanol conversion pathway (scenario B3)	1,3-Butadiene	1,3-Butadiene production	Wastewater	Output	0.95	t	FALSE	Has_Output
[84]	Two-step bioethanol conversion pathway (scenario B4)	1,3-Butadiene	1,3-Butadiene production	Ethanol (93 wt%)	Input	2.116	t	FALSE	Has_Input
[84]	Two-step bioethanol conversion pathway (scenario B4)	1,3-Butadiene	1,3-Butadiene production	Octane	Input	0.02	t	FALSE	Has_Input
[84]	Two-step bioethanol conversion pathway (scenario B4)	1,3-Butadiene	1,3-Butadiene production	Water	Input	0	t	FALSE	Has_Input
[84]	Two-step bioethanol conversion pathway (scenario B4)	1,3-Butadiene	1,3-Butadiene production	DMF	Input	0.001	t	FALSE	Has_Input
[84]	Two-step bioethanol conversion pathway (scenario B4)	1,3-Butadiene	1,3-Butadiene production	Electricity	Input	564.8	kWh	TRUE	Has_Input
[84]	Two-step bioethanol conversion pathway (scenario B4)	1,3-Butadiene	1,3-Butadiene production	1,3-BD	Output	1	t	FALSE	Has_Output
[84]	Two-step bioethanol conversion pathway (scenario B4)	1,3-Butadiene	1,3-Butadiene production	Butenes	Output	0.048	t	FALSE	Has_Output
[84]	Two-step bioethanol conversion pathway (scenario B4)	1,3-Butadiene	1,3-Butadiene production	Ethylene	Output	0.029	t	FALSE	Has_Output
[84]	Two-step bioethanol conversion pathway (scenario B4)	1,3-Butadiene	1,3-Butadiene production	Propylene	Output	0.003	t	FALSE	Has_Output
[84]	Two-step bioethanol conversion pathway (scenario B4)	1,3-Butadiene	1,3-Butadiene production	Acetaldehyde	Output	0	t	FALSE	Has_Output
[84]	Two-step bioethanol conversion pathway (scenario B4)	1,3-Butadiene	1,3-Butadiene production	Hydrogen	Output	0.029	t	FALSE	Has_Output
[84]	Two-step bioethanol conversion pathway (scenario B4)	1,3-Butadiene	1,3-Butadiene production	Residual fuel streams	Output	0.139	t	FALSE	Has_Output
[84]	Two-step bioethanol conversion pathway (scenario B4)	1,3-Butadiene	1,3-Butadiene production	Wastewater	Output	0.888	t	FALSE	Has_Output
[85]	Two-step EtOH conversion pathway (Scenario BD-b)	1,3-Butadiene	1,3-Butadiene production	Bagasse and brown leaves	Input	65000	kg	FALSE	Has_Input
[85]	Two-step EtOH conversion pathway (Scenario BD-b)	1,3-Butadiene	1,3-Butadiene production	Sulphure	Input	356	kg	FALSE	Has_Input
[85]	Two-step EtOH conversion pathway (Scenario BD-b)	1,3-Butadiene	1,3-Butadiene production	Sulphuric acid (93%)	Input	0.491	kg	FALSE	Has_Input
[85]	Two-step EtOH conversion pathway (Scenario BD-b)	1,3-Butadiene	1,3-Butadiene production	Ammonia	Input	44	kg	FALSE	Has_Input
[85]	Two-step EtOH conversion pathway (Scenario BD-b)	1,3-Butadiene	1,3-Butadiene production	Diammonium phosphate	Input	54	kg	FALSE	Has_Input
[85]	Two-step EtOH conversion pathway (Scenario BD-b)	1,3-Butadiene	1,3-Butadiene production	Glucose	Input	928	kg	FALSE	Has_Input
[85]	Two-step EtOH conversion pathway (Scenario BD-b)	1,3-Butadiene	1,3-Butadiene production	Boiler & cooling tower Chemicals	Input	0.5	kg	FALSE	Has_Input
[85]	Two-step EtOH conversion pathway (Scenario BD-b)	1,3-Butadiene	1,3-Butadiene production	NaoCl	Input	6.48	kg	FALSE	Has_Input
[85]	Two-step EtOH conversion pathway (Scenario BD-b)	1,3-Butadiene	1,3-Butadiene production	Butadiene production	Output	4570	kg	TRUE	Has_Output
[85]	Two-step EtOH conversion pathway (Scenario BD-b)	1,3-Butadiene	1,3-Butadiene production	Exported electricity	Output	15	MW	FALSE	Has_Output
[85]	Two-step EtOH conversion pathway (Scenario BD-b)	1,3-Butadiene	1,3-Butadiene production	EtOH	Output	3.17	kg	FALSE	Has_Output
[85]	Two-step EtOH conversion pathway (Scenario BD-b)	1,3-Butadiene	1,3-Butadiene production	CO2	Output	93000	kg	FALSE	Has_Output
[85]	Two-step EtOH conversion pathway (Scenario BD-b)	1,3-Butadiene	1,3-Butadiene production	SO2	Output	42.1	kg	FALSE	Has_Output
[85]	Two-step EtOH conversion pathway (Scenario BD-b)	1,3-Butadiene	1,3-Butadiene production	Acetic Acid	Output	5.36	kg	FALSE	Has_Output
[85]	Two-step EtOH conversion pathway (Scenario BD-b)	1,3-Butadiene	1,3-Butadiene production	Furfural	Output	0.841	kg	FALSE	Has_Output
[85]	Two-step EtOH conversion pathway (Scenario BD-b)	1,3-Butadiene	1,3-Butadiene production	CH4	Output	13.6	kg	FALSE	Has_Output
[85]	Two-step EtOH conversion pathway (Scenario BD-b)	1,3-Butadiene	1,3-Butadiene production	NO2	Output	0.046	kg	FALSE	Has_Output
[85]	Two-step EtOH conversion pathway (Scenario BD-b)	1,3-Butadiene	1,3-Butadiene production	CO	Output	0.274	kg	FALSE	Has_Output
[85]	Two-step EtOH conversion pathway (Scenario BD-b)	1,3-Butadiene	1,3-Butadiene production	1,3-BD (emission)	Output	46	kg	FALSE	Has_Output
[85]	Two-step EtOH conversion pathway (Scenario BD-b)	1,3-Butadiene	1,3-Butadiene production	Acetaldehyde	Output	6.28	kg	FALSE	Has_Output
[85]	Two-step EtOH conversion pathway (Scenario BD-b)	1,3-Butadiene	1,3-Butadiene production	Ethyle acetate	Output	6.04	kg	FALSE	Has_Output
[85]	Two-step EtOH conversion pathway (Scenario BD-b)	1,3-Butadiene	1,3-Butadiene production	Diethylether	Output	12.7	kg	FALSE	Has_Output
[85]	Two-step EtOH conversion pathway (Scenario BD-b)	1,3-Butadiene	1,3-Butadiene production	Ethylene	Output	2.16	kg	FALSE	Has_Output
[85]	Two-step EtOH conversion pathway (Scenario BD-b)	1,3-Butadiene	1,3-Butadiene production	1-butene	Output	2.11	kg	FALSE	Has_Output
[85]	Two-step EtOH conversion pathway (Scenario BD-b)	1,3-Butadiene	1,3-Butadiene production	Hexadiene	Output	6.26	kg	FALSE	Has_Output
[85]	Two-step EtOH conversion pathway (Scenario BD-b)	1,3-Butadiene	1,3-Butadiene production	Landfill disposal of ash	Output	3230	kg	FALSE	Has_Output
[85]	Two-step EtOH conversion pathway (Scenario BD-c)	1,3-Butadiene	1,3-Butadiene production	Bagasse and brown leaves	Input	65000	kg	FALSE	Has_Input
[85]	Two-step EtOH conversion pathway (Scenario BD-c)	1,3-Butadiene	1,3-Butadiene production	Sulphure	Input	426	kg	FALSE	Has_Input
[85]	Two-step EtOH conversion pathway (Scenario BD-c)	1,3-Butadiene	1,3-Butadiene production	Sulphuric acid (93%)	Input	0.6	kg	FALSE	Has_Input
[85]	Two-step EtOH conversion pathway (Scenario BD-c)	1,3-Butadiene	1,3-Butadiene production	Ammonia	Input	46	kg	FALSE	Has_Input
[85]	Two-step EtOH conversion pathway (Scenario BD-c)	1,3-Butadiene	1,3-Butadiene production	Diammonium phosphate	Input	67.7	kg	FALSE	Has_Input
[85]	Two-step EtOH conversion pathway (Scenario BD-c)	1,3-Butadiene	1,3-Butadiene production	Glucose	Input	1160	kg	FALSE	Has_Input
[85]	Two-step EtOH conversion pathway (Scenario BD-c)	1,3-Butadiene	1,3-Butadiene production	Boiler & cooling tower Chemicals	Input	0.5	kg	FALSE	Has_Input
[85]	Two-step EtOH conversion pathway (Scenario BD-c)	1,3-Butadiene	1,3-Butadiene production	NaoCl	Input	6.48	kg	FALSE	Has_Input
[85]	Two-step EtOH conversion pathway (Scenario BD-c)	1,3-Butadiene	1,3-Butadiene production	Coal	Input	6600	kg	FALSE	Has_Input
[85]	Two-step EtOH conversion pathway (Scenario BD-c)	1,3-Butadiene	1,3-Butadiene production	Butadiene production	Output	5730	kg	TRUE	Has_Output
[85]	Two-step EtOH conversion pathway (Scenario BD-c)	1,3-Butadiene	1,3-Butadiene production	Exported electricity	Output	6.7	MW	FALSE	Has_Output
[85]	Two-step EtOH conversion pathway (Scenario BD-c)	1,3-Butadiene	1,3-Butadiene production	EtOH	Output	60100	kg	FALSE	Has_Output
[85]	Two-step EtOH conversion pathway (Scenario BD-c)	1,3-Butadiene	1,3-Butadiene production	CO2	Output	85200	kg	FALSE	Has_Output
[85]	Two-step EtOH conversion pathway (Scenario BD-c)	1,3-Butadiene	1,3-Butadiene production	SO2	Output	52.2	kg	FALSE	Has_Output
[85]	Two-step EtOH conversion pathway (Scenario BD-c)	1,3-Butadiene	1,3-Butadiene production	Acetic Acid	Output	5.77	kg	FALSE	Has_Output
[85]	Two-step EtOH conversion pathway (Scenario BD-c)	1,3-Butadiene	1,3-Butadiene production	Furfural	Output	1.01	kg	FALSE	Has_Output
[85]	Two-step EtOH conversion pathway (Scenario BD-c)	1,3-Butadiene	1,3-Butadiene production	CH4	Output	17	kg	FALSE	Has_Output
[85]	Two-step EtOH conversion pathway (Scenario BD-c)	1,3-Butadiene	1,3-Butadiene production	NO2	Output	0.046	kg	FALSE	Has_Output
[85]	Two-step EtOH conversion pathway (Scenario BD-c)	1,3-Butadiene	1,3-Butadiene production	CO	Output	0.341	kg	FALSE	Has_Output
[85]	Two-step EtOH conversion pathway (Scenario BD-c)	1,3-Butadiene	1,3-Butadiene production	1,3-BD (emission)	Output	57.5	kg	FALSE	Has_Output
[85]	Two-step EtOH conversion pathway (Scenario BD-c)	1,3-Butadiene	1,3-Butadiene production	Acetaldehyde	Output	7.86	kg	FALSE	Has_Output
[85]	Two-step EtOH conversion pathway (Scenario BD-c)	1,3-Butadiene	1,3-Butadiene production	Ethyle acetate	Output	7.55	kg	FALSE	Has_Output
[85]	Two-step EtOH conversion pathway (Scenario BD-c)	1,3-Butadiene	1,3-Butadiene production	Diethylether	Output	15.9	kg	FALSE	Has_Output
[85]	Two-step EtOH conversion pathway (Scenario BD-c)	1,3-Butadiene	1,3-Butadiene production	Ethylene	Output	2.69	kg	FALSE	Has_Output
[85]	Two-step EtOH conversion pathway (Scenario BD-c)	1,3-Butadiene	1,3-Butadiene production	1-butene	Output	2.64	kg	FALSE	Has_Output
[85]	Two-step EtOH conversion pathway (Scenario BD-c)	1,3-Butadiene	1,3-Butadiene production	Hexadiene	Output	7.83	kg	FALSE	Has_Output
[85]	Two-step EtOH conversion pathway (Scenario BD-c)	1,3-Butadiene	1,3-Butadiene production	Landfill disposal of ash	Output	3330	kg	FALSE	Has_Output
[86]	Naphtha cracking pathway	1,3-Butadiene	1,3-Butadiene production	Naphtha	Input	22.2	t	FALSE	Has_Input
[86]	Naphtha cracking pathway	1,3-Butadiene	1,3-Butadiene production	Energy	Input	200	GJ	FALSE	Has_Input
[86]	Naphtha cracking pathway	1,3-Butadiene	1,3-Butadiene production	Ethylene	Output	7	t	FALSE	Has_Output
[86]	Naphtha cracking pathway	1,3-Butadiene	1,3-Butadiene production	Propylene	Output	3.22	t	FALSE	Has_Output
[86]	Naphtha cracking pathway	1,3-Butadiene	1,3-Butadiene production	Aromatics and C4	Output	2.89	t	FALSE	Has_Output
[86]	Naphtha cracking pathway	1,3-Butadiene	1,3-Butadiene production	CH4	Output	3	t	FALSE	Has_Output
[86]	Naphtha cracking pathway	1,3-Butadiene	1,3-Butadiene production	H2	Output	0.222	t	FALSE	Has_Output
[86]	Naphtha cracking pathway	1,3-Butadiene	1,3-Butadiene production	Other	Output	2.44	t	FALSE	Has_Output
[86]	Naphtha cracking pathway	1,3-Butadiene	1,3-Butadiene production	Losses&blackflows	Output	2.44	t	FALSE	Has_Output
[86]	Naphtha cracking pathway	1,3-Butadiene	1,3-Butadiene production	CO2	Output	13.3	t	FALSE	Has_Output
[86]	Naphtha cracking pathway	1,3-Butadiene	1,3-Butadiene production	1,3-BD	Output	1	t	TRUE	Has_Output
[86]	Lebedev process pathway	1,3-Butadiene	1,3-Butadiene production	Ethanol	Input	2.06	t	FALSE	Has_Input
[86]	Lebedev process pathway	1,3-Butadiene	1,3-Butadiene production	Electricity	Input	0.986	GJ	FALSE	Has_Input
[86]	Lebedev process pathway	1,3-Butadiene	1,3-Butadiene production	Cooling water	Input	70	t	FALSE	Has_Input
[86]	Lebedev process pathway	1,3-Butadiene	1,3-Butadiene production	Steam	Input	2.66	t	FALSE	Has_Input
[86]	Lebedev process pathway	1,3-Butadiene	1,3-Butadiene production	CO2	Output	0.00906	t	FALSE	Has_Output
[86]	Lebedev process pathway	1,3-Butadiene	1,3-Butadiene production	Fuel (Methane)	Output	0.14	t	FALSE	Has_Output
[86]	Lebedev process pathway	1,3-Butadiene	1,3-Butadiene production	Diethyl Ether	Output	0.0381	t	FALSE	Has_Output
[86]	Lebedev process pathway	1,3-Butadiene	1,3-Butadiene production	Acetaldehyde	Output	0.226	t	FALSE	Has_Output
[86]	Lebedev process pathway	1,3-Butadiene	1,3-Butadiene production	1,3-BD	Output	1	t	TRUE	Has_Output
[86]	Ostromisslensky process pathway	1,3-Butadiene	1,3-Butadiene production	Ethanol	Input	3.75	t	FALSE	Has_Input
[86]	Ostromisslensky process pathway	1,3-Butadiene	1,3-Butadiene production	Electricity	Input	0.774	GJ	FALSE	Has_Input
[86]	Ostromisslensky process pathway	1,3-Butadiene	1,3-Butadiene production	Cooling water	Input	50	t	FALSE	Has_Input
[86]	Ostromisslensky process pathway	1,3-Butadiene	1,3-Butadiene production	Steam	Input	2.2	t	FALSE	Has_Input
[86]	Ostromisslensky process pathway	1,3-Butadiene	1,3-Butadiene production	CO2	Output	2.1	t	FALSE	Has_Output
[86]	Ostromisslensky process pathway	1,3-Butadiene	1,3-Butadiene production	Ethylene	Output	0.0851	t	FALSE	Has_Output
[86]	Ostromisslensky process pathway	1,3-Butadiene	1,3-Butadiene production	Butene	Output	0.0956	t	FALSE	Has_Output
[86]	Ostromisslensky process pathway	1,3-Butadiene	1,3-Butadiene production	n-Butanol	Output	0.0277	t	FALSE	Has_Output
[86]	Ostromisslensky process pathway	1,3-Butadiene	1,3-Butadiene production	Butyraldehyde	Output	0.003	t	FALSE	Has_Output
[86]	Ostromisslensky process pathway	1,3-Butadiene	1,3-Butadiene production	Crothyl alcohol	Output	0.0192	t	FALSE	Has_Output
[86]	Ostromisslensky process pathway	1,3-Butadiene	1,3-Butadiene production	1,3-BD	Output	1	t	TRUE	Has_Output
[89]	Bio-IBN production (scenario 1)	1,3-Butadiene	1,3-Butadiene production	Activated carbon	Input	0.92	kg	FALSE	Has_Input
[89]	Bio-IBN production (scenario 1)	1,3-Butadiene	1,3-Butadiene production	Air	Input	73479.1	kg	FALSE	Has_Input
[89]	Bio-IBN production (scenario 1)	1,3-Butadiene	1,3-Butadiene production	Ammonia	Input	310.1	kg	FALSE	Has_Input
[89]	Bio-IBN production (scenario 1)	1,3-Butadiene	1,3-Butadiene production	Ammonium sulphate	Input	43.64	kg	FALSE	Has_Input
[89]	Bio-IBN production (scenario 1)	1,3-Butadiene	1,3-Butadiene production	Antifoam	Input	0	kg	FALSE	Has_Input
[89]	Bio-IBN production (scenario 1)	1,3-Butadiene	1,3-Butadiene production	Caustic	Input	1406	kg	FALSE	Has_Input
[89]	Bio-IBN production (scenario 1)	1,3-Butadiene	1,3-Butadiene production	Corn stover	Input	104167	kg	FALSE	Has_Input
[89]	Bio-IBN production (scenario 1)	1,3-Butadiene	1,3-Butadiene production	Diammonium phosphate	Input	178.44	kg	FALSE	Has_Input
[89]	Bio-IBN production (scenario 1)	1,3-Butadiene	1,3-Butadiene production	Enzymes	Input	54	kg	FALSE	Has_Input
[89]	Bio-IBN production (scenario 1)	1,3-Butadiene	1,3-Butadiene production	Lime	Input	895	kg	FALSE	Has_Input
[89]	Bio-IBN production (scenario 1)	1,3-Butadiene	1,3-Butadiene production	Magnesium oxide	Input	1.18	kg	FALSE	Has_Input
[89]	Bio-IBN production (scenario 1)	1,3-Butadiene	1,3-Butadiene production	MEA	Input	31.39	kg	FALSE	Has_Input
[89]	Bio-IBN production (scenario 1)	1,3-Butadiene	1,3-Butadiene production	Potassium chloride	Input	5.88	kg	FALSE	Has_Input
[89]	Bio-IBN production (scenario 1)	1,3-Butadiene	1,3-Butadiene production	Potassium hydroxide	Input	41.68	kg	FALSE	Has_Input
[89]	Bio-IBN production (scenario 1)	1,3-Butadiene	1,3-Butadiene production	Phosphoric acid	Input	46.12	kg	FALSE	Has_Input
[89]	Bio-IBN production (scenario 1)	1,3-Butadiene	1,3-Butadiene production	Process water	Input	1030462	kg	FALSE	Has_Input
[89]	Bio-IBN production (scenario 1)	1,3-Butadiene	1,3-Butadiene production	Sodium chloride	Input	1.64	kg	FALSE	Has_Input
[89]	Bio-IBN production (scenario 1)	1,3-Butadiene	1,3-Butadiene production	Sulfuric acid	Input	750	kg	FALSE	Has_Input
[89]	Bio-IBN production (scenario 1)	1,3-Butadiene	1,3-Butadiene production	Wheat straw	Input	104167	kg	FALSE	Has_Input
[89]	Bio-IBN production (scenario 1)	1,3-Butadiene	1,3-Butadiene production	Isobutener	Output	13065.5	kg	TRUE	Has_Output
[89]	Bio-IBN production (scenario 2)	1,3-Butadiene	1,3-Butadiene production	Activated carbon	Input	0.92	kg	FALSE	Has_Input
[89]	Bio-IBN production (scenario 2)	1,3-Butadiene	1,3-Butadiene production	Air	Input	734790	kg	FALSE	Has_Input
[89]	Bio-IBN production (scenario 2)	1,3-Butadiene	1,3-Butadiene production	Ammonia	Input	310	kg	FALSE	Has_Input
[89]	Bio-IBN production (scenario 2)	1,3-Butadiene	1,3-Butadiene production	Ammonium sulphate	Input	43.64	kg	FALSE	Has_Input
[89]	Bio-IBN production (scenario 2)	1,3-Butadiene	1,3-Butadiene production	Antifoam	Input	360.73	kg	FALSE	Has_Input
[89]	Bio-IBN production (scenario 2)	1,3-Butadiene	1,3-Butadiene production	Caustic	Input	1406	kg	FALSE	Has_Input
[89]	Bio-IBN production (scenario 2)	1,3-Butadiene	1,3-Butadiene production	Corn stover	Input	104167	kg	FALSE	Has_Input
[89]	Bio-IBN production (scenario 2)	1,3-Butadiene	1,3-Butadiene production	Diammonium phosphate	Input	178.44	kg	FALSE	Has_Input
[89]	Bio-IBN production (scenario 2)	1,3-Butadiene	1,3-Butadiene production	Enzymes	Input	54	kg	FALSE	Has_Input
[89]	Bio-IBN production (scenario 2)	1,3-Butadiene	1,3-Butadiene production	Lime	Input	895	kg	FALSE	Has_Input
[89]	Bio-IBN production (scenario 2)	1,3-Butadiene	1,3-Butadiene production	Magnesium oxide	Input	1.18	kg	FALSE	Has_Input
[89]	Bio-IBN production (scenario 2)	1,3-Butadiene	1,3-Butadiene production	MEA	Input	31.39	kg	FALSE	Has_Input
[89]	Bio-IBN production (scenario 2)	1,3-Butadiene	1,3-Butadiene production	Potassium chloride	Input	5.88	kg	FALSE	Has_Input
[89]	Bio-IBN production (scenario 2)	1,3-Butadiene	1,3-Butadiene production	Potassium hydroxide	Input	41.68	kg	FALSE	Has_Input
[89]	Bio-IBN production (scenario 2)	1,3-Butadiene	1,3-Butadiene production	Phosphoric acid	Input	46.12	kg	FALSE	Has_Input
[89]	Bio-IBN production (scenario 2)	1,3-Butadiene	1,3-Butadiene production	Process water	Input	1093978	kg	FALSE	Has_Input
[89]	Bio-IBN production (scenario 2)	1,3-Butadiene	1,3-Butadiene production	Sodium chloride	Input	1.64	kg	FALSE	Has_Input
[89]	Bio-IBN production (scenario 2)	1,3-Butadiene	1,3-Butadiene production	Sulfuric acid	Input	750	kg	FALSE	Has_Input
[89]	Bio-IBN production (scenario 2)	1,3-Butadiene	1,3-Butadiene production	Wheat straw	Input	104167	kg	FALSE	Has_Input
[89]	Bio-IBN production (scenario 2)	1,3-Butadiene	1,3-Butadiene production	Ethanol	Output	10737.4	kg	FALSE	Has_Output
[89]	Bio-IBN production (scenario 2)	1,3-Butadiene	1,3-Butadiene production	Hydrogen	Output	5616.33	kg	FALSE	Has_Output
[89]	Bio-IBN production (scenario 2)	1,3-Butadiene	1,3-Butadiene production	Isobutener	Output	13065.5	kg	TRUE	Has_Output
[89]	Bio-IBN production (scenario 2)	1,3-Butadiene	1,3-Butadiene production	Oxygen	Output	66971.8	kg	FALSE	Has_Output
[89]	Bio-IBN production (scenario 3)	1,3-Butadiene	1,3-Butadiene production	Activated carbon	Input	0.92	kg/hour	FALSE	Has_Input
[89]	Bio-IBN production (scenario 3)	1,3-Butadiene	1,3-Butadiene production	Air	Input	734790	kg/hour	FALSE	Has_Input
[89]	Bio-IBN production (scenario 3)	1,3-Butadiene	1,3-Butadiene production	Ammonia	Input	310	kg/hour	FALSE	Has_Input
[89]	Bio-IBN production (scenario 3)	1,3-Butadiene	1,3-Butadiene production	Ammonium sulphate	Input	43.64	kg/hour	FALSE	Has_Input
[89]	Bio-IBN production (scenario 3)	1,3-Butadiene	1,3-Butadiene production	Antifoam	Input	360.73	kg/hour	FALSE	Has_Input
[89]	Bio-IBN production (scenario 3)	1,3-Butadiene	1,3-Butadiene production	Caustic	Input	1406	kg/hour	FALSE	Has_Input
[89]	Bio-IBN production (scenario 3)	1,3-Butadiene	1,3-Butadiene production	Corn stover	Input	104167	kg/hour	FALSE	Has_Input
[89]	Bio-IBN production (scenario 3)	1,3-Butadiene	1,3-Butadiene production	Diammonium phosphate	Input	178.44	kg/hour	FALSE	Has_Input
[89]	Bio-IBN production (scenario 3)	1,3-Butadiene	1,3-Butadiene production	Enzymes	Input	54	kg/hour	FALSE	Has_Input
[89]	Bio-IBN production (scenario 3)	1,3-Butadiene	1,3-Butadiene production	Lime	Input	895	kg/hour	FALSE	Has_Input
[89]	Bio-IBN production (scenario 3)	1,3-Butadiene	1,3-Butadiene production	Magnesium oxide	Input	1.18	kg/hour	FALSE	Has_Input
[89]	Bio-IBN production (scenario 3)	1,3-Butadiene	1,3-Butadiene production	MEA	Input	31.39	kg/hour	FALSE	Has_Input
[89]	Bio-IBN production (scenario 3)	1,3-Butadiene	1,3-Butadiene production	Potassium chloride	Input	5.88	kg/hour	FALSE	Has_Input
[89]	Bio-IBN production (scenario 3)	1,3-Butadiene	1,3-Butadiene production	Potassium hydroxide	Input	41.68	kg/hour	FALSE	Has_Input
[89]	Bio-IBN production (scenario 3)	1,3-Butadiene	1,3-Butadiene production	Phosphoric acid	Input	46.12	kg/hour	FALSE	Has_Input
[89]	Bio-IBN production (scenario 3)	1,3-Butadiene	1,3-Butadiene production	Process water	Input	1035615	kg/hour	FALSE	Has_Input
[89]	Bio-IBN production (scenario 3)	1,3-Butadiene	1,3-Butadiene production	Sodium chloride	Input	1.64	kg/hour	FALSE	Has_Input
[89]	Bio-IBN production (scenario 3)	1,3-Butadiene	1,3-Butadiene production	Sulfuric acid	Input	750	kg/hour	FALSE	Has_Input
[89]	Bio-IBN production (scenario 3)	1,3-Butadiene	1,3-Butadiene production	Wheat straw	Input	104167	kg/hour	FALSE	Has_Input
[89]	Bio-IBN production (scenario 3)	1,3-Butadiene	1,3-Butadiene production	Isobutene	Output	13065.5	kg/hour	TRUE	Has_Output
[89]	Bio-IBN production (scenario 3)	1,3-Butadiene	1,3-Butadiene production	Oxygen	Output	13276.3	kg/hour	FALSE	Has_Output
[89]	Bio-IBN production (scenario 3)	1,3-Butadiene	1,3-Butadiene production	Syngas (CO)	Output	13015.3	kg/hour	FALSE	Has_Output
[90]	Wheat straw-based pathway	Itaconic acid	Itaconic acid production	Straw wheat	Input	26605	t	FALSE	Has_Input
[90]	Wheat straw-based pathway	Itaconic acid	Itaconic acid production	Water	Input	62903	t	FALSE	Has_Input
[90]	Wheat straw-based pathway	Itaconic acid	Itaconic acid production	Steam	Input	27496	t	FALSE	Has_Input
[90]	Wheat straw-based pathway	Itaconic acid	Itaconic acid production	Enzyme	Input	118	t	FALSE	Has_Input
[90]	Wheat straw-based pathway	Itaconic acid	Itaconic acid production	Electricity	Input	44084	MWh	FALSE	Has_Input
[90]	Wheat straw-based pathway	Itaconic acid	Itaconic acid production	NH4NO3	Input	89	t	FALSE	Has_Input
[90]	Wheat straw-based pathway	Itaconic acid	Itaconic acid production	CaCl2	Input	148	t	FALSE	Has_Input
[90]	Wheat straw-based pathway	Itaconic acid	Itaconic acid production	KH2PO4	Input	3	t	FALSE	Has_Input
[90]	Wheat straw-based pathway	Itaconic acid	Itaconic acid production	NH3	Input	33	t	FALSE	Has_Input
[90]	Wheat straw-based pathway	Itaconic acid	Itaconic acid production	Glucose	Input	668	t	FALSE	Has_Input
[90]	Wheat straw-based pathway	Itaconic acid	Itaconic acid production	Electricity	Input	29515	MWh	FALSE	Has_Input
[90]	Wheat straw-based pathway	Itaconic acid	Itaconic acid production	Water	Input	158	t	FALSE	Has_Input
[90]	Wheat straw-based pathway	Itaconic acid	Itaconic acid production	Electricity	Input	16385	MWh	FALSE	Has_Input
[90]	Wheat straw-based pathway	Itaconic acid	Itaconic acid production	Water	Input	7338	t	FALSE	Has_Input
[90]	Wheat straw-based pathway	Itaconic acid	Itaconic acid production	NaOH	Input	2928	t	FALSE	Has_Input
[90]	Wheat straw-based pathway	Itaconic acid	Itaconic acid production	Electricity	Input	115	MWh	FALSE	Has_Input
[90]	Wheat straw-based pathway	Itaconic acid	Itaconic acid production	Biomass residues	Input	745433	t	FALSE	Has_Input
[90]	Wheat straw-based pathway	Itaconic acid	Itaconic acid production	Water	Input	69814	t	FALSE	Has_Input
[90]	Wheat straw-based pathway	Itaconic acid	Itaconic acid production	Electricity	Input	2230	MWh	FALSE	Has_Input
[90]	Wheat straw-based pathway	Itaconic acid	Itaconic acid production	Air	Input	234383	t	FALSE	Has_Input
[90]	Wheat straw-based pathway	Itaconic acid	Itaconic acid production	CO2 biogenic	Output	781	t	FALSE	Has_Output
[90]	Wheat straw-based pathway	Itaconic acid	Itaconic acid production	Air	Output	2259	t	FALSE	Has_Output
[90]	Wheat straw-based pathway	Itaconic acid	Itaconic acid production	Organic amendment	Output	23995	t	FALSE	Has_Output
[90]	Wheat straw-based pathway	Itaconic acid	Itaconic acid production	Effluent water	Output	167807	m3	FALSE	Has_Output
[90]	Wheat straw-based pathway	Itaconic acid	Itaconic acid production	Itaconic acid	Output	2203	t	TRUE	Has_Output
[92]	wheat straw-to-xylitol pathway	Xylitol	Xylitol production	Wheat straw (dry)	Input	150000	t	FALSE	Has_Input
[92]	wheat straw-to-xylitol pathway	Xylitol	Xylitol production	Sulfuric acid	Input	17756	t	FALSE	Has_Input
[92]	wheat straw-to-xylitol pathway	Xylitol	Xylitol production	Enzymes	Input	2591	t	FALSE	Has_Input
[92]	wheat straw-to-xylitol pathway	Xylitol	Xylitol production	Ammonium sulfate	Input	13	t	FALSE	Has_Input
[92]	wheat straw-to-xylitol pathway	Xylitol	Xylitol production	Sodium hydroxide	Input	827	t	FALSE	Has_Input
[92]	wheat straw-to-xylitol pathway	Xylitol	Xylitol production	Process water	Input	21419	t	FALSE	Has_Input
[92]	wheat straw-to-xylitol pathway	Xylitol	Xylitol production	Ethanol	Input	2592	t	FALSE	Has_Input
[92]	wheat straw-to-xylitol pathway	Xylitol	Xylitol production	CO2 (fossil)	Input	1551	t	FALSE	Has_Input
[92]	wheat straw-to-xylitol pathway	Xylitol	Xylitol production	Transport to plant	Input	15000000	t*km	FALSE	Has_Input
[92]	wheat straw-to-xylitol pathway	Xylitol	Xylitol production	Steam (MP)	Input	1611300	t	FALSE	Has_Input
[92]	wheat straw-to-xylitol pathway	Xylitol	Xylitol production	Electricity	Input	78732000	MJ	FALSE	Has_Input
[92]	wheat straw-to-xylitol pathway	Xylitol	Xylitol production	Cooling water	Input	2407300	t	FALSE	Has_Input
[92]	wheat straw-to-xylitol pathway	Xylitol	Xylitol production	Chilling water	Input	6.77	t	FALSE	Has_Input
[92]	wheat straw-to-xylitol pathway	Xylitol	Xylitol production	Xylitol	Output	12186	t	TRUE	Has_Output
[92]	wheat straw-to-xylitol pathway	Xylitol	Xylitol production	Succinic acid	Output	19220	t	FALSE	Has_Output
[92]	wheat straw-to-xylitol pathway	Xylitol	Xylitol production	Waste brine	Output	59576	t	FALSE	Has_Output
[92]	wheat straw-to-xylitol pathway	Xylitol	Xylitol production	Ashes	Output	911	t	FALSE	Has_Output
[92]	wheat straw-to-xylitol pathway	Xylitol	Xylitol production	CO2 (biogen)	Output	523	t	FALSE	Has_Output
[93]	Fermentative xylitol production (Wet air oxidation (WAO) pretreatment)	Xylitol	Xylitol production	Wheat bran	Input	300	g	FALSE	Has_Input
[93]	Fermentative xylitol production (Wet air oxidation (WAO) pretreatment)	Xylitol	Xylitol production	Air pressure	Input	8	bar	FALSE	Has_Input
[93]	Fermentative xylitol production (Wet air oxidation (WAO) pretreatment)	Xylitol	Xylitol production	Water	Input	3	L	FALSE	Has_Input
[93]	Fermentative xylitol production (Wet air oxidation (WAO) pretreatment)	Xylitol	Xylitol production	Electrical	Input	223.5	kWh	FALSE	Has_Input
[93]	Fermentative xylitol production (Wet air oxidation (WAO) pretreatment)	Xylitol	Xylitol production	Yeast	Input	0.01	kg	FALSE	Has_Input
[93]	Fermentative xylitol production (Wet air oxidation (WAO) pretreatment)	Xylitol	Xylitol production	(NH4)2SO4	Input	0.001	kg	FALSE	Has_Input
[93]	Fermentative xylitol production (Wet air oxidation (WAO) pretreatment)	Xylitol	Xylitol production	KH2PO4	Input	0.002	kg	FALSE	Has_Input
[93]	Fermentative xylitol production (Wet air oxidation (WAO) pretreatment)	Xylitol	Xylitol production	MgSO4	Input	0.001	kg	FALSE	Has_Input
[93]	Fermentative xylitol production (Wet air oxidation (WAO) pretreatment)	Xylitol	Xylitol production	Xylitol	Output	1.816	g	TRUE	Has_Output
[93]	Fermentative xylitol production (Wet air oxidation (WAO) pretreatment)	Xylitol	Xylitol production	Water	Input	3	L	FALSE	Has_Input
[93]	Fermentative xylitol production (Wet air oxidation (WAO) pretreatment)	Xylitol	Xylitol production	Sulphuric acid	Input	0.03	L	FALSE	Has_Input
[93]	Fermentative xylitol production (Wet air oxidation (WAO) pretreatment)	Xylitol	Xylitol production	Electricity	Input	222.249	kWh	FALSE	Has_Input
[93]	Fermentative xylitol production (Wet air oxidation (WAO) pretreatment)	Xylitol	Xylitol production	Calcium carbonate	Input	0.0084	kg	FALSE	Has_Input
[93]	Fermentative xylitol production (Wet air oxidation (WAO) pretreatment)	Xylitol	Xylitol production	Activated carbon	Input	0.084	kg	FALSE	Has_Input
[93]	Fermentative xylitol production (Wet air oxidation (WAO) pretreatment)	Xylitol	Xylitol production	Yeast (Pichia stipitis)	Input	0.01	kg	FALSE	Has_Input
[93]	Fermentative xylitol production (Wet air oxidation (WAO) pretreatment)	Xylitol	Xylitol production	(NH4)2SO4	Input	0.001	kg	FALSE	Has_Input
[93]	Fermentative xylitol production (Wet air oxidation (WAO) pretreatment)	Xylitol	Xylitol production	KH2PO4	Input	0.002	kg	FALSE	Has_Input
[93]	Fermentative xylitol production (Wet air oxidation (WAO) pretreatment)	Xylitol	Xylitol production	MgSO4	Input	0.001	kg	FALSE	Has_Input
[93]	Fermentative xylitol production (Wet air oxidation (WAO) pretreatment)	Xylitol	Xylitol production	Xylitol	Output	1.42	g	TRUE	Has_Output
[99]	Electrochemical production pathway	FDCA	FDCA production	KOH	Input	270.48	kg	FALSE	Has_Input
[99]	Electrochemical production pathway	FDCA	FDCA production	Water	Input	504884	kg	FALSE	Has_Input
[99]	Electrochemical production pathway	FDCA	FDCA production	Co6.4Ni	Input	98.77	kg	FALSE	Has_Input
[99]	Electrochemical production pathway	FDCA	FDCA production	Electricity	Input	159840	kWh	FALSE	Has_Input
[99]	Electrochemical production pathway	FDCA	FDCA production	HMF	Input	85073.6	kg	FALSE	Has_Input
[99]	Electrochemical production pathway	FDCA	FDCA production	Sulphuric acid	Input	495.427	kg	FALSE	Has_Input
[99]	Electrochemical production pathway	FDCA	FDCA production	Water	Input	4763.88	kg	FALSE	Has_Input
[99]	Electrochemical production pathway	FDCA	FDCA production	FDCA	Output	100	t	TRUE	Has_Output
[99]	Electrochemical production pathway	FDCA	FDCA production	Hydrogen	Output	3946.4	kg	FALSE	Has_Output
[99]	Electrochemical production pathway	FDCA	FDCA production	Wastewater	Output	489644	kg	FALSE	Has_Output
[99]	Thermochemical production pathway	FDCA	FDCA production	Acetic Acid	Input	392000	kg	FALSE	Has_Input
[99]	Thermochemical production pathway	FDCA	FDCA production	Water	Input	588000	kg	FALSE	Has_Input
[99]	Thermochemical production pathway	FDCA	FDCA production	Pt5ZrO2	Input	3.9	kg	FALSE	Has_Input
[99]	Thermochemical production pathway	FDCA	FDCA production	Electricity	Input	1087000	kWh	FALSE	Has_Input
[99]	Thermochemical production pathway	FDCA	FDCA production	Heating	Input	892000	kWh	FALSE	Has_Input
[99]	Thermochemical production pathway	FDCA	FDCA production	Cooling	Input	198000	kWh	FALSE	Has_Input
[99]	Thermochemical production pathway	FDCA	FDCA production	HMF	Input	82000	kg	FALSE	Has_Input
[99]	Thermochemical production pathway	FDCA	FDCA production	Cooling	Input	1197000	kWh	FALSE	Has_Input
[99]	Thermochemical production pathway	FDCA	FDCA production	Electricity	Input	1700	kWh	FALSE	Has_Input
[99]	Thermochemical production pathway	FDCA	FDCA production	Cooling	Input	369000	kWh	FALSE	Has_Input
[99]	Thermochemical production pathway	FDCA	FDCA production	FDCA	Output	100	t	TRUE	Has_Output
[99]	Thermochemical production pathway	FDCA	FDCA production	Nitrogen	Output	1662000	kg	FALSE	Has_Output
[99]	Thermochemical production pathway	FDCA	FDCA production	Oxygen	Output	464000	kg	FALSE	Has_Output
[99]	Thermochemical production pathway	FDCA	FDCA production	Water	Output	32000	kg	FALSE	Has_Output
[99]	Thermochemical production pathway	FDCA	FDCA production	Acetic acid	Output	23000	kg	FALSE	Has_Output
[99]	Thermochemical production pathway	FDCA	FDCA production	Wastewater	Output	880	m^3	FALSE	Has_Output
[100]	Biomass-Derived FDCA production	FDCA	FDCA production	Biomass	Input	6.74	kg	FALSE	Has_Input
[100]	Biomass-Derived FDCA production	FDCA	FDCA production	THF	Input	0.06	kg	FALSE	Has_Input
[100]	Biomass-Derived FDCA production	FDCA	FDCA production	H2SO4	Input	0.21	kg	FALSE	Has_Input
[100]	Biomass-Derived FDCA production	FDCA	FDCA production	Heavy oil	Input	0.03	kg	FALSE	Has_Input
[100]	Biomass-Derived FDCA production	FDCA	FDCA production	Ca(OH)2	Input	0.07	kg	FALSE	Has_Input
[100]	Biomass-Derived FDCA production	FDCA	FDCA production	NaCl	Input	0.05	kg	FALSE	Has_Input
[100]	Biomass-Derived FDCA production	FDCA	FDCA production	H2	Input	0.07	kg	FALSE	Has_Input
[100]	Biomass-Derived FDCA production	FDCA	FDCA production	O2	Input	1.43	kg	FALSE	Has_Input
[100]	Biomass-Derived FDCA production	FDCA	FDCA production	Heat (natural gas)	Input	1.42	MJ	FALSE	Has_Input
[100]	Biomass-Derived FDCA production	FDCA	FDCA production	Electricity (natural gas)	Input	7.02	MJ	FALSE	Has_Input
[100]	Biomass-Derived FDCA production	FDCA	FDCA production	Xylene	Input	0.66	kg	FALSE	Has_Input
[100]	Biomass-Derived FDCA production	FDCA	FDCA production	FDCA	Output	1	kg	TRUE	Has_Output
[100]	Biomass-Derived FDCA production	FDCA	FDCA production	1,5-PDO	Output	0.65	kg	FALSE	Has_Output
[100]	Biomass-Derived FDCA production	FDCA	FDCA production	Activated carbon	Output	0.63	kg	FALSE	Has_Output
[100]	Biomass-Derived FDCA production	FDCA	FDCA production	Ash	Output	0.68	kg	FALSE	Has_Output
[100]	Biomass-Derived FDCA production	FDCA	FDCA production	CO2	Output	1.52	kg	FALSE	Has_Output
[100]	Biomass-Derived FDCA production	FDCA	FDCA production	Gypsum	Output	0.17	kg	FALSE	Has_Output
[100]	Biomass-Derived FDCA production	FDCA	FDCA production	Coke	Output	0.06	kg	FALSE	Has_Output
[100]	Biomass-Derived FDCA production	FDCA	FDCA production	H2O	Output	0.001	m3	FALSE	Has_Output
[101]	Biomass-to-FDCA pathway	FDCA	FDCA production	Biomass	Input	6.724	kg	FALSE	Has_Input
[101]	Biomass-to-FDCA pathway	FDCA	FDCA production	H2SO4	Input	0.212	kg	FALSE	Has_Input
[101]	Biomass-to-FDCA pathway	FDCA	FDCA production	THF	Input	0.057	kg	FALSE	Has_Input
[101]	Biomass-to-FDCA pathway	FDCA	FDCA production	Heavy oil	Input	0.034	kg	FALSE	Has_Input
[101]	Biomass-to-FDCA pathway	FDCA	FDCA production	Lime	Input	0.071	kg	FALSE	Has_Input
[101]	Biomass-to-FDCA pathway	FDCA	FDCA production	O2	Input	1.444	kg	FALSE	Has_Input
[101]	Biomass-to-FDCA pathway	FDCA	FDCA production	Electricity	Input	2.564	MJ	FALSE	Has_Input
[101]	Biomass-to-FDCA pathway	FDCA	FDCA production	FDCA	Output	1	kg	TRUE	Has_Output
[101]	Biomass-to-FDCA pathway	FDCA	FDCA production	Activated carbon	Output	0.633	kg	FALSE	Has_Output
[101]	Biomass-to-FDCA pathway	FDCA	FDCA production	CO2	Output	1.541	kg	FALSE	Has_Output
[101]	Biomass-to-FDCA pathway	FDCA	FDCA production	H2O	Output	0.001	m^3	FALSE	Has_Output
[101]	Biomass-to-FDCA pathway	FDCA	FDCA production	Gypsum	Output	0.174	kg	FALSE	Has_Output
[101]	Biomass-to-FDCA pathway	FDCA	FDCA production	Ash	Output	0.492	kg	FALSE	Has_Output
[102]	Lignocellulosic biomass-based pathway (purification through crystallization)	FDCA	FDCA production	Acetic acid	Input	3.67	kg	FALSE	Has_Input
[102]	Lignocellulosic biomass-based pathway (purification through crystallization)	FDCA	FDCA production	Water	Input	5.5	kg	FALSE	Has_Input
[102]	Lignocellulosic biomass-based pathway (purification through crystallization)	FDCA	FDCA production	HMF	Input	0.82	kg	FALSE	Has_Input
[102]	Lignocellulosic biomass-based pathway (purification through crystallization)	FDCA	FDCA production	PtZrO2 catalyst	Input	0.037	g	FALSE	Has_Input
[102]	Lignocellulosic biomass-based pathway (purification through crystallization)	FDCA	FDCA production	Electricity	Input	15.83	kWh	FALSE	Has_Input
[102]	Lignocellulosic biomass-based pathway (purification through crystallization)	FDCA	FDCA production	Heating	Input	14.08	kWh	FALSE	Has_Input
[102]	Lignocellulosic biomass-based pathway (purification through crystallization)	FDCA	FDCA production	Cooling	Input	1.4	kWh	FALSE	Has_Input
[102]	Lignocellulosic biomass-based pathway (purification through crystallization)	FDCA	FDCA production	Cooling	Input	11.97	kWh	FALSE	Has_Input
[102]	Lignocellulosic biomass-based pathway (purification through crystallization)	FDCA	FDCA production	Electricity	Input	0.017	kWh	FALSE	Has_Input
[102]	Lignocellulosic biomass-based pathway (purification through crystallization)	FDCA	FDCA production	Cooling	Input	3.69	kWh	FALSE	Has_Input
[102]	Lignocellulosic biomass-based pathway (purification through crystallization)	FDCA	FDCA production	FDCA	Output	1	kg	TRUE	Has_Output
[102]	Lignocellulosic biomass-based pathway (purification through crystallization)	FDCA	FDCA production	Water	Output	0.32	kg	FALSE	Has_Output
[102]	Lignocellulosic biomass-based pathway (purification through crystallization)	FDCA	FDCA production	Acetic acid	Output	0.23	kg	FALSE	Has_Output
[102]	Lignocellulosic biomass-based pathway (purification through crystallization)	FDCA	FDCA production	Nitrogen	Output	16.62	kg	FALSE	Has_Output
[102]	Lignocellulosic biomass-based pathway (purification through crystallization)	FDCA	FDCA production	Oxygen	Output	4.64	kg	FALSE	Has_Output
[102]	Lignocellulosic biomass-based pathway (purification through crystallization)	FDCA	FDCA production	Wastewater	Output	0.0088	m^3	FALSE	Has_Output
[102]	Lignocellulosic biomass-based pathway (purification through distillation)	FDCA	FDCA production	Acetic acid	Input	3.92	kg	FALSE	Has_Input
[102]	Lignocellulosic biomass-based pathway (purification through distillation)	FDCA	FDCA production	Water	Input	5.88	kg	FALSE	Has_Input
[102]	Lignocellulosic biomass-based pathway (purification through distillation)	FDCA	FDCA production	HMF	Input	0.82	kg	FALSE	Has_Input
[102]	Lignocellulosic biomass-based pathway (purification through distillation)	FDCA	FDCA production	Pt-ZrO2	Input	0.039	g	FALSE	Has_Input
[102]	Lignocellulosic biomass-based pathway (purification through distillation)	FDCA	FDCA production	Electricity	Input	85.34	kWh	FALSE	Has_Input
[102]	Lignocellulosic biomass-based pathway (purification through distillation)	FDCA	FDCA production	Heating	Input	8.92	kWh	FALSE	Has_Input
[102]	Lignocellulosic biomass-based pathway (purification through distillation)	FDCA	FDCA production	Cooling	Input	67.42	kWh	FALSE	Has_Input
[102]	Lignocellulosic biomass-based pathway (purification through distillation)	FDCA	FDCA production	Heating	Input	8.24	kWh	FALSE	Has_Input
[102]	Lignocellulosic biomass-based pathway (purification through distillation)	FDCA	FDCA production	FDCA	Output	1	kg	TRUE	Has_Output
[102]	Lignocellulosic biomass-based pathway (purification through distillation)	FDCA	FDCA production	Water	Output	0.81	kg	FALSE	Has_Output
[102]	Lignocellulosic biomass-based pathway (purification through distillation)	FDCA	FDCA production	Acetic acid	Output	0.35	kg	FALSE	Has_Output
[102]	Lignocellulosic biomass-based pathway (purification through distillation)	FDCA	FDCA production	Nitrogen	Output	17.57	kg	FALSE	Has_Output
[102]	Lignocellulosic biomass-based pathway (purification through distillation)	FDCA	FDCA production	Oxygen	Output	5.02	kg	FALSE	Has_Output
[102]	Lignocellulosic biomass-based pathway (purification through distillation)	FDCA	FDCA production	Wastewater	Output	0.00799	m3	FALSE	Has_Output
[102]	Lignocellulosic biomass-based pathway (purification through distillation)	FDCA	FDCA production	Nitrogen	Output	0.000886	kg	FALSE	Has_Output
[102]	Lignocellulosic biomass-based pathway (purification through distillation)	FDCA	FDCA production	Oxygen	Output	0.000279	kg	FALSE	Has_Output
[102]	Lignocellulosic biomass-based pathway (purification through distillation)	FDCA	FDCA production	Wastewater	Output	0.0088	m3	FALSE	Has_Output
[103]	Biomass-to-FDCA (crystallization separation-scenario A)	FDCA	FDCA production	Acetic acid	Input	3.67	kg	FALSE	Has_Input
[103]	Biomass-to-FDCA (crystallization separation-scenario A)	FDCA	FDCA production	Water	Input	5.5	kg	FALSE	Has_Input
[103]	Biomass-to-FDCA (crystallization separation-scenario A)	FDCA	FDCA production	HMF	Input	0.82	kg	FALSE	Has_Input
[103]	Biomass-to-FDCA (crystallization separation-scenario A)	FDCA	FDCA production	Catalyst	Input	0.04	kg	FALSE	Has_Input
[103]	Biomass-to-FDCA (crystallization separation-scenario A)	FDCA	FDCA production	P-1 electricity	Input	0.02	kWh	FALSE	Has_Input
[103]	Biomass-to-FDCA (crystallization separation-scenario A)	FDCA	FDCA production	E-1 heating energy	Input	11.36	kWh	FALSE	Has_Input
[103]	Biomass-to-FDCA (crystallization separation-scenario A)	FDCA	FDCA production	R-1 heating energy	Input	2.72	kWh	FALSE	Has_Input
[103]	Biomass-to-FDCA (crystallization separation-scenario A)	FDCA	FDCA production	C1-electricity	Input	1.85	kWh	FALSE	Has_Input
[103]	Biomass-to-FDCA (crystallization separation-scenario A)	FDCA	FDCA production	C-1 cooling energy	Input	1.4	kWh	FALSE	Has_Input
[103]	Biomass-to-FDCA (crystallization separation-scenario A)	FDCA	FDCA production	E-2 cooling energy	Input	11.97	kWh	FALSE	Has_Input
[103]	Biomass-to-FDCA (crystallization separation-scenario A)	FDCA	FDCA production	P-2 electricity	Input	0.02	kWh	FALSE	Has_Input
[103]	Biomass-to-FDCA (crystallization separation-scenario A)	FDCA	FDCA production	CR-1 cooling energy	Input	3.69	kWh	FALSE	Has_Input
[103]	Biomass-to-FDCA (crystallization separation-scenario A)	FDCA	FDCA production	FDCA	Output	1	kg	TRUE	Has_Output
[103]	Biomass-to-FDCA (crystallization separation-scenario A)	FDCA	FDCA production	Water	Output	0.32	kg	FALSE	Has_Output
[103]	Biomass-to-FDCA (crystallization separation-scenario A)	FDCA	FDCA production	Acetic acid	Output	0.23	kg	FALSE	Has_Output
[103]	Biomass-to-FDCA (crystallization separation-scenario A)	FDCA	FDCA production	Furan compounds	Output	5.2e-09	kg	FALSE	Has_Output
[103]	Biomass-to-FDCA (crystallization separation-scenario A)	FDCA	FDCA production	Nitrogen	Output	16.62	kg	FALSE	Has_Output
[103]	Biomass-to-FDCA (crystallization separation-scenario A)	FDCA	FDCA production	Oxygen	Output	4.64	kg	FALSE	Has_Output
[103]	Biomass-to-FDCA (crystallization separation-scenario A)	FDCA	FDCA production	Wastewater to treatment	Output	0.0089	m^3	FALSE	Has_Output
[103]	Biomass-to-FDCA (distillation separation-scenario B)	FDCA	FDCA production	Acetic acid	Input	3.92	kg	FALSE	Has_Input
[103]	Biomass-to-FDCA (distillation separation-scenario B)	FDCA	FDCA production	Water	Input	5.88	kg	FALSE	Has_Input
[103]	Biomass-to-FDCA (distillation separation-scenario B)	FDCA	FDCA production	HMF	Input	0.82	kg	FALSE	Has_Input
[103]	Biomass-to-FDCA (distillation separation-scenario B)	FDCA	FDCA production	Catalyst	Input	0.039	kg	FALSE	Has_Input
[103]	Biomass-to-FDCA (distillation separation-scenario B)	FDCA	FDCA production	P-1 electricity	Input	0.11	kWh	FALSE	Has_Input
[103]	Biomass-to-FDCA (distillation separation-scenario B)	FDCA	FDCA production	E-1 heating energy	Input	8.92	kWh	FALSE	Has_Input
[103]	Biomass-to-FDCA (distillation separation-scenario B)	FDCA	FDCA production	R-1 cooling energy	Input	0.51	kWh	FALSE	Has_Input
[103]	Biomass-to-FDCA (distillation separation-scenario B)	FDCA	FDCA production	C-1 cooling energy	Input	1.47	kWh	FALSE	Has_Input
[103]	Biomass-to-FDCA (distillation separation-scenario B)	FDCA	FDCA production	C-1 electricity	Input	1.95	kWh	FALSE	Has_Input
[103]	Biomass-to-FDCA (distillation separation-scenario B)	FDCA	FDCA production	F-1 heating energy	Input	65.26	kWh	FALSE	Has_Input
[103]	Biomass-to-FDCA (distillation separation-scenario B)	FDCA	FDCA production	F-2 cooling energy	Input	74.47	kWh	FALSE	Has_Input
[103]	Biomass-to-FDCA (distillation separation-scenario B)	FDCA	FDCA production	D-1 reboiler duty	Input	8.24	kWh	FALSE	Has_Input
[103]	Biomass-to-FDCA (distillation separation-scenario B)	FDCA	FDCA production	D-1 condenser duty	Input	8.42	kWh	FALSE	Has_Input
[103]	Biomass-to-FDCA (distillation separation-scenario B)	FDCA	FDCA production	P-2 electricity	Input	0.00114	kWh	FALSE	Has_Input
[103]	Biomass-to-FDCA (distillation separation-scenario B)	FDCA	FDCA production	FDCA	Output	1	kg	TRUE	Has_Output
[103]	Biomass-to-FDCA (distillation separation-scenario B)	FDCA	FDCA production	Water	Output	0.81	kg	FALSE	Has_Output
[103]	Biomass-to-FDCA (distillation separation-scenario B)	FDCA	FDCA production	Acetic acid	Output	0.33	kg	FALSE	Has_Output
[103]	Biomass-to-FDCA (distillation separation-scenario B)	FDCA	FDCA production	Furan compounds	Output	9.81e-10	kg	FALSE	Has_Output
[103]	Biomass-to-FDCA (distillation separation-scenario B)	FDCA	FDCA production	Nitrogen	Output	17.57	kg	FALSE	Has_Output
[103]	Biomass-to-FDCA (distillation separation-scenario B)	FDCA	FDCA production	Oxygen	Output	5.02	kg	FALSE	Has_Output
[103]	Biomass-to-FDCA (distillation separation-scenario B)	FDCA	FDCA production	Wastewater to treatment	Output	0.00799	m^3	FALSE	Has_Output
[103]	Biomass-to-FDCA (distillation separation-scenario B)	FDCA	FDCA production	Water	Output	0.0125	kg	FALSE	Has_Output
[103]	Biomass-to-FDCA (distillation separation-scenario B)	FDCA	FDCA production	Acetic acid	Output	0.0083	kg	FALSE	Has_Output
[103]	Biomass-to-FDCA (distillation separation-scenario B)	FDCA	FDCA production	Furan compounds	Output	4.51e-08	kg	FALSE	Has_Output
[103]	Biomass-to-FDCA (distillation separation-scenario B)	FDCA	FDCA production	Nitrogen	Output	0.000886	kg	FALSE	Has_Output
[103]	Biomass-to-FDCA (distillation separation-scenario B)	FDCA	FDCA production	Oxygen	Output	0.000279	kg	FALSE	Has_Output
[103]	Biomass-to-FDCA (distillation separation-scenario B)	FDCA	FDCA production	Wastewater to treatment	Output	0.00112	m^3	FALSE	Has_Output
[106]	Two-stage hydrolysis pathway	p-Xylene	p-Xylene production	Biomass (dried)	Input	10.04	ton	FALSE	Has_Input
[106]	Two-stage hydrolysis pathway	p-Xylene	p-Xylene production	H2SO4	Input	0.32	ton	FALSE	Has_Input
[106]	Two-stage hydrolysis pathway	p-Xylene	p-Xylene production	Water	Input	38.82	ton	FALSE	Has_Input
[106]	Two-stage hydrolysis pathway	p-Xylene	p-Xylene production	Lime	Input	0.51	ton	FALSE	Has_Input
[106]	Two-stage hydrolysis pathway	p-Xylene	p-Xylene production	Air	Input	35.15	ton	FALSE	Has_Input
[106]	Two-stage hydrolysis pathway	p-Xylene	p-Xylene production	Electricity	Input	0.41	GJ	FALSE	Has_Input
[106]	Two-stage hydrolysis pathway	p-Xylene	p-Xylene production	CaSO4	Input	0.38	ton	FALSE	Has_Input
[106]	Two-stage hydrolysis pathway	p-Xylene	p-Xylene production	Na2CO3	Input	0.32	ton	FALSE	Has_Input
[106]	Two-stage hydrolysis pathway	p-Xylene	p-Xylene production	N2	Input	26.67	ton	FALSE	Has_Input
[106]	Two-stage hydrolysis pathway	p-Xylene	p-Xylene production	O2	Input	2.45	ton	FALSE	Has_Input
[106]	Two-stage hydrolysis pathway	p-Xylene	p-Xylene production	p-Xylene	Output	1	t	TRUE	Has_Output
[106]	Two-stage hydrolysis pathway	p-Xylene	p-Xylene production	Prehydrolysate	Output	3.94	ton	FALSE	Has_Output
[106]	Two-stage hydrolysis pathway	p-Xylene	p-Xylene production	Glucose	Output	2.77	ton	FALSE	Has_Output
[106]	Two-stage hydrolysis pathway	p-Xylene	p-Xylene production	Heat	Output	-109.97	GJ	FALSE	Has_Output
[106]	Two-stage hydrolysis pathway	p-Xylene	p-Xylene production	Water	Output	3.42	ton	FALSE	Has_Output
[106]	Two-stage hydrolysis pathway	p-Xylene	p-Xylene production	CO2	Output	7.39	ton	FALSE	Has_Output
[106]	Two-stage hydrolysis pathway	p-Xylene	p-Xylene production	CaSO4	Output	0.38	ton	FALSE	Has_Output
[106]	Two-stage hydrolysis pathway	p-Xylene	p-Xylene production	Na2CO3	Output	0.32	ton	FALSE	Has_Output
[106]	Two-stage hydrolysis pathway	p-Xylene	p-Xylene production	N2	Output	26.67	ton	FALSE	Has_Output
[106]	Two-stage hydrolysis pathway	p-Xylene	p-Xylene production	O2	Output	2.45	ton	FALSE	Has_Output
[106]	Starch-based pathway	p-Xylene	p-Xylene production	Starch	Input	2.77	t	FALSE	Has_Input
[106]	Starch-based pathway	p-Xylene	p-Xylene production	HCl	Input	0.062	t	FALSE	Has_Input
[106]	Starch-based pathway	p-Xylene	p-Xylene production	NaCl	Input	0.55	t	FALSE	Has_Input
[106]	Starch-based pathway	p-Xylene	p-Xylene production	THF	Input	0.11	t	FALSE	Has_Input
[106]	Starch-based pathway	p-Xylene	p-Xylene production	H2	Input	0.079	t	FALSE	Has_Input
[106]	Starch-based pathway	p-Xylene	p-Xylene production	Ethylene	Input	0.32	t	FALSE	Has_Input
[106]	Starch-based pathway	p-Xylene	p-Xylene production	Heptane	Input	0.03	t	FALSE	Has_Input
[106]	Starch-based pathway	p-Xylene	p-Xylene production	Steam, natural gas	Input	68.11	GJ	FALSE	Has_Input
[106]	Starch-based pathway	p-Xylene	p-Xylene production	Electricity	Input	0.94	GJ	FALSE	Has_Input
[106]	Starch-based pathway	p-Xylene	p-Xylene production	p-Xylene	Output	1	t	TRUE	Has_Output
[106]	Starch-based pathway	p-Xylene	p-Xylene production	BYPROD1	Output	0.46	t	FALSE	Has_Output
[106]	Starch-based pathway	p-Xylene	p-Xylene production	BYPROD2	Output	0.15	t	FALSE	Has_Output
[106]	Starch-based pathway	p-Xylene	p-Xylene production	Humins	Output	0.18	t	FALSE	Has_Output
[106]	Starch-based pathway	p-Xylene	p-Xylene production	Waste water	Output	1.283	t	FALSE	Has_Output
[106]	Starch-based pathway	p-Xylene	p-Xylene production	NaCl	Output	0.55	t	FALSE	Has_Output
[106]	Starch-based pathway	p-Xylene	p-Xylene production	HCl	Output	0.062	t	FALSE	Has_Output
[106]	Starch-based pathway	p-Xylene	p-Xylene production	THF	Output	0.11	t	FALSE	Has_Output
[106]	Starch-based pathway	p-Xylene	p-Xylene production	CO2	Output	0.062	t	FALSE	Has_Output
[106]	Starch-based pathway	p-Xylene	p-Xylene production	Formic acid	Output	0.032	t	FALSE	Has_Output
[106]	Starch-based pathway	p-Xylene	p-Xylene production	Heptane	Output	0.03	t	FALSE	Has_Output

## Sheet: LCIA_result_data
New_ID	Title	Reference product	has_impact_result	Technical pathway	LCIA Method	Impact category	Impact category value	Impact category unit	Functional unit	Harmonization value (kg CO2-eq/kg)
[1]	Carbon footprint evaluation of coal-to-methanol chain with the hierarchical attribution management and life cycle assessment	Methanol	Yes	Basic coal-to-methanol chain	IPCC 2013 AR4	Global warming potential	2.971	t CO2-eq/t	1 tonne of methanol	2.971
[1]	Carbon footprint evaluation of coal-to-methanol chain with the hierarchical attribution management and life cycle assessment	Methanol	Yes	Retrofitted coal-to-methanol chain with CCS	IPCC 2013 AR4	Global warming potential	0.64	t CO2-eq/t	1 tonne of methanol	0.64
[3]	Greenhouse gas emissions of rice straw-to-methanol chain in Southern Brazil	Methanol	Yes	Rice straw-based pathway	IPCC Fifth Assessment Report	Global warming potential	0.809	kg CO2-eq/kg	1 kg of methanol	0.809
[4]	Life-cycle assessment for coal-based methanol production in China	Methanol	Yes	Coal gasification technology (CGT)	CML 2001	Global warming potential	17700	kg CO2-eq/t	1 tonne of methanol	17.7
[4]	Life-cycle assessment for coal-based methanol production in China	Methanol	Yes	Coal coking technology (CCT)	CML 2001	Global warming potential	2890	kg CO2-eq/t	1 tonne of methanol	2.89
[5]	Innovative alternatives to methanol manufacture: Carbon footprint assessment	Methanol	Yes	Conventional natural gas-based pathway (ACONV)	Not mentioned	Global warming potential	0.525	kg CO2-eq/kg	1 kg of metahnol	0.525
[5]	Innovative alternatives to methanol manufacture: Carbon footprint assessment	Methanol	Yes	Direct hydrogenation of CO2 pathway (ADH)	Not mentioned	Global warming potential	0.23	kg CO2-eq/kg	1 kg of metahnol	0.23
[6]	Olive pomace versus natural gas for methanol production: a life cycle assessment	Methanol	Yes	Olive pomace to methanol	ReCiPe 2016	Global warming potential	19.5	kg CO2-eq/kg	1 kg of methanol	19.5
[6]	Olive pomace versus natural gas for methanol production: a life cycle assessment	Methanol	Yes	Natural gas to methanol	ReCiPe 2017	Global warming potential	8.74	kg CO2-eq/kg	1 kg of methanol	8.74
[7]	Energy consumption and greenhouse gas emissions of shale gas chemical looping reforming process integrated with coal gasification for methanol production	Methanol	Yes	Novel process	CML2001-2016	Global warming potential	940	kg CO2-eq/t	1 tonne methanol	0.94
[8]	Bridge to zero-emission: Life cycle assessment of CO2-methanol conversion process and energy optimization	Methanol	Yes	Coal gasification conversion (CGC)	ReCiPe 2016 (H) ver. 1.03	Global warming potential	17.7	kg CO2-eq/kg	1 kg of methanol	17.7
[8]	Bridge to zero-emission: Life cycle assessment of CO2-methanol conversion process and energy optimization	Methanol	Yes	Coal coking conversion (CCC)	ReCiPe 2016 (H) ver. 1.03	Global warming potential	2.9	kg CO2-eq/kg	1 kg of methanol	2.9
[8]	Bridge to zero-emission: Life cycle assessment of CO2-methanol conversion process and energy optimization	Methanol	Yes	Photocatalytic conversion (PC)	ReCiPe 2016 (H) ver. 1.03	Global warming potential	2.28	kg CO2-eq/kg	1 kg of methanol	2.28
[8]	Bridge to zero-emission: Life cycle assessment of CO2-methanol conversion process and energy optimization	Methanol	Yes	Hydrogenation conversion (HC)	ReCiPe 2016 (H) ver. 1.03	Global warming potential	10.7	kg CO2-eq/kg	1 kg of methanol	10.7
[10]	Comprehensive analysis of environmental impacts and energy consumption of biomass-to-methanol and coal-to-methanol via life cycle assessment	Methanol	Yes	Coal-to-methanol (CTM) process	CML2001	Global warming potential	274428	kg CO2-eq/79 t	79 tonne of methanol	3.47
[11]	Environmental life cycle assessment of methanol and electricity co-production system based on coal gasification technology	Methanol	Yes	Methanol and electricity co-production	IPCC 2007 GWP 100a	Global warming potential	198	Mg CO2-eq/h	1 kg of methanol	/
[12]	Unveiling environmental impacts of methanol production via electrocatalysis against conventional and thermochemical routes by life cycle assessment	Methanol	Yes	Electrochemical CO2 reduction (EC) pathway	ReCiPe 2016 (H) V 1.03	Global warming potential	64.4	kg CO2-eq/kg	1 kg of methanol	64.4
[12]	Unveiling environmental impacts of methanol production via electrocatalysis against conventional and thermochemical routes by life cycle assessment	Methanol	Yes	Thermochemical CO2 hydrogenation (TC) pathway	ReCiPe 2016 (H) V 1.03	Global warming potential	87.53	kg CO2-eq/kg	1 kg of methanol	87.53
[14]	Technoeconomic and Life Cycle Analysis of Synthetic Methanol Production from Hydrogen and Industrial Byproduct CO2	Methanol	Yes	Stand-alone methanol production	GREET 2020	Global warming potential	-55.7	g CO2-eq/MJ	1 MJ of methanol	/
[14]	Technoeconomic and Life Cycle Analysis of Synthetic Methanol Production from Hydrogen and Industrial Byproduct CO2	Methanol	Yes	Methanol-ethanol coproduction	GREET 2020	Global warming potential	-32.2	g CO2-eq/MJ	1 MJ of methanol	/
[14]	Technoeconomic and Life Cycle Analysis of Synthetic Methanol Production from Hydrogen and Industrial Byproduct CO2	Methanol	Yes	Methanol-ammonia coproduction	GREET 2020	Global warming potential	14.2	g CO2-eq/MJ	1 MJ of methanol	/
[15]	Building an agent-based techno-economic assessment coupled with life cycle assessment of biomass to methanol supply chains	Methanol	Yes	Rice straw-based pathway 1	Not mentioned	Global warming potential	2.53	kg CO2-eq/t	1 tonne of methanol	2.53
[15]	Building an agent-based techno-economic assessment coupled with life cycle assessment of biomass to methanol supply chains	Methanol	Yes	Rice straw-based pathway 2	Not mentioned	Global warming potential	5.6	kg CO2-eq/t	1 tonne of methanol	5.6
[16]	Integrating life cycle assessment for design and optimization of methanol production from combining methane dry reforming and partial oxidation	Methanol	Yes	Methanol	Not mentioned	Global warming potential	0.81	kg CO2-eq/kg	1 kg of methanol	0.81
[17]	A techno-economic and life cycle assessment for the production of green methanol from CO2: catalyst and process bottlenecks	Methanol	Yes	Case 1	Not mentioned	Global warming potential	1.5	kg CO2-eq/kg	2.75E+08 kg methanol	1.5
[17]	A techno-economic and life cycle assessment for the production of green methanol from CO2: catalyst and process bottlenecks	Methanol	Yes	Case 2	Not mentioned	Global warming potential	1.7	kg CO2-eq/kg	2.75E+08 kg methanol	1.7
[18]	Alternative sustainable routes to methanol production: Techno-economic and environmental assessment	Methanol	Yes	Conventional process	Not mentioned	Global warming potential	0.35	t CO2-eq/t	1 tonne of methanol	0.35
[18]	Alternative sustainable routes to methanol production: Techno-economic and environmental assessment	Methanol	Yes	BR-to-methanol	Not mentioned	Global warming potential	-0.14	t CO2-eq/t	1 tonne of methanol	-0.14
[18]	Alternative sustainable routes to methanol production: Techno-economic and environmental assessment	Methanol	Yes	BSG-to-methanol	Not mentioned	Global warming potential	-0.91	t CO2-eq/t	1 tonne of methanol	-0.91
[18]	Alternative sustainable routes to methanol production: Techno-economic and environmental assessment	Methanol	Yes	CO2 hydrogenation (AW electrolysis)	Not mentioned	Global warming potential	-1.21	t CO2-eq/t	1 tonne of methanol	-1.21
[18]	Alternative sustainable routes to methanol production: Techno-economic and environmental assessment	Methanol	Yes	CO2 hydrogenation (PEM electrolysis)	Not mentioned	Global warming potential	-1.17	t CO2-eq/t	1 tonne of methanol	-1.17
[19]	Life cycle assessment and economic analysis of methanol production from coke oven gas compared with coal and natural gas routes	Methanol	Yes	Coke oven gas (COG) route	CML 2001	Global warming potential	1200.8	kg CO2-eq/t	1 tonne of methanol	1.2008
[19]	Life cycle assessment and economic analysis of methanol production from coke oven gas compared with coal and natural gas routes	Methanol	Yes	Coal route	CML 2001	Global warming potential	1643.5	kg CO2-eq/t	1 tonne of methanol	1.6435
[19]	Life cycle assessment and economic analysis of methanol production from coke oven gas compared with coal and natural gas routes	Methanol	Yes	Natural gas route	CML 2001	Global warming potential	915.4	kg CO2-eq/t	1 tonne of methanol	0.9154
[20]	LCA comparison analysis for two types of H2 carriers: Methanol and ammonia	Methanol	Yes	Coal-CH3OH	CML 2001	Global warming potential	3.09	kg CO2-eq/kg	1 tonne of methanol	3.09
[20]	LCA comparison analysis for two types of H2 carriers: Methanol and ammonia	Methanol	Yes	NG-CH3OH	CML 2001	Global warming potential	0.84	kg CO2-eq/kg	1 tonne of methanol	0.84
[20]	LCA comparison analysis for two types of H2 carriers: Methanol and ammonia	Methanol	Yes	PV/CCU-CH3OH	CML 2001	Global warming potential	1.04	kg CO2-eq/kg	1 tonne of methanol	1.04
[21]	Methanol Production from Solid Recovered Fuel and Lignite: Techno-Economic and Environmental Assessment	Methanol	Yes	Solid Recovered Fuel and Lignite to methanol pathway (case1)	ReCiPe	Global warming potential	7.19	kg CO2-eq/kg	1 kg of methanol	7.19
[21]	Methanol Production from Solid Recovered Fuel and Lignite: Techno-Economic and Environmental Assessment	Methanol	Yes	Solid Recovered Fuel and Lignite to methanol pathway (case2)	ReCiPe	Global warming potential	6.21	kg CO2-eq/kg	1 kg of methanol	6.21
[21]	Methanol Production from Solid Recovered Fuel and Lignite: Techno-Economic and Environmental Assessment	Methanol	Yes	Solid Recovered Fuel and Lignite to methanol pathway (case3)	ReCiPe	Global warming potential	5.27	kg CO2-eq/kg	1 kg of methanol	5.27
[21]	Methanol Production from Solid Recovered Fuel and Lignite: Techno-Economic and Environmental Assessment	Methanol	Yes	Natural gas to methanol pathway	ReCiPe	Global warming potential	1.32	kg CO2-eq/kg	1 kg of methanol	1.32
[22]	Transition into Net-Zero Carbon Community from Fossil Fuels: Life Cycle Assessment of Light-Driven CO2 Conversion to Methanol Using Graphitic Carbon Nitride	Methanol	Yes	Photocatalytic CH3OH system	ReCiPe midpoint/endpoint (Hierarchist)	Global warming potential	76.85	kg CO2-eq/kg	1 kg of methanol	76.85
[22]	Transition into Net-Zero Carbon Community from Fossil Fuels: Life Cycle Assessment of Light-Driven CO2 Conversion to Methanol Using Graphitic Carbon Nitride	Methanol	Yes	Conventional CH3OH system	ReCiPe midpoint/endpoint (Hierarchist)	Global warming potential	339	kg CO2-eq/kg	1 kg of methanol	339
[23]	A Comprehensive Assessment of the Carbon Footprint of the Coal-to-Methanol Process Coupled with Carbon Capture-, Utilization-, and Storage-Enhanced Oil Recovery Technology	Methanol	Yes	Coal-to-methanol pathway (Scenario 1)	Not mentioned	Global warming potential	2.63	t CO2-eq/t	1 tonne of methanol	2.63
[23]	A Comprehensive Assessment of the Carbon Footprint of the Coal-to-Methanol Process Coupled with Carbon Capture-, Utilization-, and Storage-Enhanced Oil Recovery Technology	Methanol	Yes	Coal-to-methanol pathway (Scenario 2)	Not mentioned	Global warming potential	1	t CO2-eq/t	1 tonne of methanol	1
[24]	A LCA (life cycle assessment) of the methanol production from sugarcane bagasse	Methanol	Yes	Sugarcane bagasse-based pathway	CML 2001	Global warming potential	2.284	kg CO2-eq/kg	1 kg of methanol	2.284
[25]	Life Cycle Assessment of Bio-methanol Derived from Various Raw-materials	Methanol	Yes	Case 1	ReCIPe	Global warming potential	1117.23	kg CO2-eq/t	1 tonne of methanol	1.11723
[25]	Life Cycle Assessment of Bio-methanol Derived from Various Raw-materials	Methanol	Yes	Case 2	ReCIPe	Global warming potential	6253.08	kg CO2-eq/t	1 tonne of methanol	6.25308
[25]	Life Cycle Assessment of Bio-methanol Derived from Various Raw-materials	Methanol	Yes	Case 3	ReCIPe	Global warming potential	1383.42	kg CO2-eq/t	1 tonne of methanol	1.38342
[25]	Life Cycle Assessment of Bio-methanol Derived from Various Raw-materials	Methanol	Yes	Case 4	ReCIPe	Global warming potential	435.13	kg CO2-eq/t	1 tonne of methanol	0.43513
[25]	Life Cycle Assessment of Bio-methanol Derived from Various Raw-materials	Methanol	Yes	Case 5	ReCIPe	Global warming potential	522.57	kg CO2-eq/t	1 tonne of methanol	0.52257
[25]	Life Cycle Assessment of Bio-methanol Derived from Various Raw-materials	Methanol	Yes	Case 6	ReCIPe	Global warming potential	848.77	kg CO2-eq/t	1 tonne of methanol	0.84877
[25]	Life Cycle Assessment of Bio-methanol Derived from Various Raw-materials	Methanol	Yes	Case 7	ReCIPe	Global warming potential	392.71	kg CO2-eq/t	1 tonne of methanol	0.39271
[25]	Life Cycle Assessment of Bio-methanol Derived from Various Raw-materials	Methanol	Yes	Case 8	ReCIPe	Global warming potential	1311.25	kg CO2-eq/t	1 tonne of methanol	1.31125
[26]	From Secondary Biomass to Bio-Methanol through CONVERGE Technology: An Environmental Analysis	Methanol	Yes	Case 1	ReCiPe	Global warming potential	1436.19	kg CO2-eq/t	1 tonne of methanol	1.43619
[26]	From Secondary Biomass to Bio-Methanol through CONVERGE Technology: An Environmental Analysis	Methanol	Yes	Case 2	ReCiPe	Global warming potential	1288.04	kg CO2-eq/t	1 tonne of methanol	1.28804
[26]	From Secondary Biomass to Bio-Methanol through CONVERGE Technology: An Environmental Analysis	Methanol	Yes	Case 3	ReCiPe	Global warming potential	2511.22	kg CO2-eq/t	1 tonne of methanol	2.51122
[27]	Techno-economic and environmental assessments for sustainable bio-methanol production as landfill gas valorization	Methanol	Yes	Case 1	Not mentioned	Global warming potential	2.36	kg CO2-eq/kg	1 kg of methanol	2.36
[27]	Techno-economic and environmental assessments for sustainable bio-methanol production as landfill gas valorization	Methanol	Yes	Case 2	Not mentioned	Global warming potential	0.835	kg CO2-eq/kg	1 kg of methanol	0.835
[27]	Techno-economic and environmental assessments for sustainable bio-methanol production as landfill gas valorization	Methanol	Yes	Case 3	Not mentioned	Global warming potential	0.605	kg CO2-eq/kg	1 kg of methanol	0.605
[28]	Formic acid production through electrochemical reduction of CO2: A life cycle assessment	Formic acid	Yes	Base case	ReCiPe 1.08 midpoint indicator	Global warming potential	3.27	kg CO2-eq/kg	1 kg of formic acid	3.27
[28]	Formic acid production through electrochemical reduction of CO2: A life cycle assessment	Formic acid	Yes	Tap ground water case	ReCiPe 1.08 midpoint indicator	Global warming potential	3.16	kg CO2-eq/kg	1 kg of formic acid	3.16
[28]	Formic acid production through electrochemical reduction of CO2: A life cycle assessment	Formic acid	Yes	Nuclear electricity case	ReCiPe 1.08 midpoint indicator	Global warming potential	0.163	kg CO2-eq/kg	1 kg of formic acid	0.163
[29]	Electrochemical production of formic acid from carbon dioxide: A life cycle assessment study	Formic acid	Yes	Electrochemical CO2-to-FA reduction process	ReCiPe 2008 midpoint (hierarchist perspective)	Global warming potential	1.502	kg CO2-eq/kg	1 kg of formic acid	1.502
[30]	From Laboratory to Industrial Scale: A Prospective LCA for Electrochemical Reduction of CO2 to Formic Acid	Formic acid	Yes	Lab-scale	ILCD 1.0.8	Global warming potential	9325	kg CO2-eq/kg	1 kg of formic acid	9325
[30]	From Laboratory to Industrial Scale: A Prospective LCA for Electrochemical Reduction of CO2 to Formic Acid	Formic acid	Yes	Best case	ILCD 1.0.8	Global warming potential	-0.4	kg CO2-eq/kg	1 kg of formic acid	-0.4
[30]	From Laboratory to Industrial Scale: A Prospective LCA for Electrochemical Reduction of CO2 to Formic Acid	Formic acid	Yes	TCC scale-up	ILCD 1.0.8	Global warming potential	6.5	kg CO2-eq/kg	1 kg of formic acid	6.5
[31]	System-level analysis and life cycle assessment of CO2 and fossil-based formic acid strategies	Formic acid	Yes	Conventional process	ReCiPe 1.13 Hierarchist	Global warming potential	2.007	kg CO2-eq/kg	1 kg of formic acid	2.007
[31]	System-level analysis and life cycle assessment of CO2 and fossil-based formic acid strategies	Formic acid	Yes	CCU process	ReCiPe 1.13 Hierarchist	Global warming potential	0.098	kg CO2-eq/kg	1 kg of formic acid	0.098
[32]	Environmental assessment of thermo-chemical processes for bio-ethylene production in comparison with bio-chemical and fossil-based ethylene	Ethylene	Yes	Case 3	CML 2	Global warming potential	-0.07	t CO2-eq/t	1 t of ethylene	-0.07
[33]	Life cycle assessment of corn- and cassava-based ethylene production	Ethylene	Yes	Cassava-based scenario	IMPACT2002+ and ReCiPe	Global warming potential	3.4	t CO2-eq/t	1 t of ethylene	5.85	average
[33]	Life cycle assessment of corn- and cassava-based ethylene production	Ethylene	Yes	Corn-based scenario	IMPACT2002+ and ReCiPe	Global warming potential	1.15	t CO2-eq/t	1 t of ethylene	3.4	average
[34]	Life cycle assessment of ethylene production from empty fruit bunch	Ethylene	Yes	Bioethylene	CML-impact assessment baseline methodology	Global warming potential	1.15	kg CO2-eq/kg	1 kg of ethylene	1.15	average
[35]	Life cycle assessment of plasma-assisted ethylene production from rich-in-methane gas streams	Ethylene	Yes	One-step process, total purge flaring, grid electricity	Not mentioned	Global warming potential	9.8	kg CO2-eq/kg	1 kg of ethylene	9.8
[35]	Life cycle assessment of plasma-assisted ethylene production from rich-in-methane gas streams	Ethylene	Yes	One-step process, partial purge flaring, WT electricity	Not mentioned	Global warming potential	1.6	kg CO2-eq/kg	1 kg of ethylene	1.6
[35]	Life cycle assessment of plasma-assisted ethylene production from rich-in-methane gas streams	Ethylene	Yes	Two-step process, no purge flaring, WT electricity	Not mentioned	Global warming potential	1.3	kg CO2-eq/kg	1 kg of ethylene	1.3
[35]	Life cycle assessment of plasma-assisted ethylene production from rich-in-methane gas streams	Ethylene	Yes	Two-step process, scenario 6	Not mentioned	Global warming potential	0.4	kg CO2-eq/kg	1 kg of ethylene	0.4
[35]	Life cycle assessment of plasma-assisted ethylene production from rich-in-methane gas streams	Ethylene	Yes	Shale gas feedstock	Not mentioned	Global warming potential	0.6	kg CO2-eq/kg	1 kg of ethylene	0.6
[35]	Life cycle assessment of plasma-assisted ethylene production from rich-in-methane gas streams	Ethylene	Yes	Natural gas feedstock	Not mentioned	Global warming potential	0.8	kg CO2-eq/kg	1 kg of ethylene	0.8
[35]	Life cycle assessment of plasma-assisted ethylene production from rich-in-methane gas streams	Ethylene	Yes	Conventional naphtha cracking	Not mentioned	Global warming potential	1.13	kg CO2-eq/kg	1 kg of ethylene	1.13
[36]	Comparative life cycle analysis on ethylene production from electrocatalytic reduction of carbon dioxide	Ethylene	Yes	Cascade	GREET model	Global warming potential	18	kg CO2-eq/kg	1 kg of ethylene	18
[36]	Comparative life cycle analysis on ethylene production from electrocatalytic reduction of carbon dioxide	Ethylene	Yes	S-MEA	GREET model	Global warming potential	32	kg CO2-eq/kg	1 kg of ethylene	32
[36]	Comparative life cycle analysis on ethylene production from electrocatalytic reduction of carbon dioxide	Ethylene	Yes	S-Alkaline	GREET model	Global warming potential	56	kg CO2-eq/kg	1 kg of ethylene	56
[36]	Comparative life cycle analysis on ethylene production from electrocatalytic reduction of carbon dioxide	Ethylene	Yes	Cascade with renewable wind power	GREET model	Global warming potential	-2.4	kg CO2-eq/kg	1 kg of ethylene	-2.4	average
[36]	Comparative life cycle analysis on ethylene production from electrocatalytic reduction of carbon dioxide	Ethylene	Yes	S-MEA with renewable wind power	GREET model	Global warming potential	-2.4	kg CO2-eq/kg	1 kg of ethylene	-2.4	average
[36]	Comparative life cycle analysis on ethylene production from electrocatalytic reduction of carbon dioxide	Ethylene	Yes	S-Alkaline with renewable wind power	GREET model	Global warming potential	-2.35	kg CO2-eq/kg	1 kg of ethylene	-2.35	average
[37]	Manufacturing Ethylene from Wet Shale Gas and Biomass: Comparative Technoeconomic Analysis and Environmental Life Cycle Assessment	Ethylene	Yes	Shale-gas-based pathway	Not mentioned	Global warming potential	1.4	kg CO2-eq/kg	1 kg of ethylene	1.4
[37]	Manufacturing Ethylene from Wet Shale Gas and Biomass: Comparative Technoeconomic Analysis and Environmental Life Cycle Assessment	Ethylene	Yes	Corn-stover-based pathway	Not mentioned	Global warming potential	-1	kg CO2-eq/kg	1 kg of ethylene	-1
[38]	LCA of electrochemical reduction of CO2 to ethylene	Ethylene	Yes	Small-scale S-1	CML 2001	Global warming potential	3.6	g CO2-eq/g	1 g of ethylene	3.6
[38]	LCA of electrochemical reduction of CO2 to ethylene	Ethylene	Yes	Small-scale S-2	CML 2001	Global warming potential	-3.7	g CO2-eq/g	1 g of ethylene	-3.7
[38]	LCA of electrochemical reduction of CO2 to ethylene	Ethylene	Yes	Small-scale S-3	CML 2001	Global warming potential	-0.98	g CO2-eq/g	1 g of ethylene	-0.98
[38]	LCA of electrochemical reduction of CO2 to ethylene	Ethylene	Yes	Large-scale L-2	CML 2001	Global warming potential	3	t CO2-eq/t	1 t of ethylene	3
[38]	LCA of electrochemical reduction of CO2 to ethylene	Ethylene	Yes	Large-scale L-3	CML 2001	Global warming potential	0.651	t CO2-eq/t	1 t of ethylene	0.651
[40]	Unpacking bio-based alternatives to ethylene production in Brazil, Europe, and the United States: A comparative life cycle assessment	Ethylene	Yes	Sugarcane ethanol dehydration	IPCC Working Group I Sixth Assessment Report (GWP 100)	Global warming potential	1.04	kg CO2-eq/kg	1 kg of ethylene	1.04
[40]	Unpacking bio-based alternatives to ethylene production in Brazil, Europe, and the United States: A comparative life cycle assessment	Ethylene	Yes	Propane steam cracking with processed beef tallow via HEFA	IPCC Working Group I Sixth Assessment Report (GWP 100)	Global warming potential	17.1	kg CO2-eq/kg	1 kg of ethylene	17.1
[40]	Unpacking bio-based alternatives to ethylene production in Brazil, Europe, and the United States: A comparative life cycle assessment	Ethylene	Yes	Sugarcane ethanol dehydration with CO2 storage	IPCC Working Group I Sixth Assessment Report (GWP 100)	Global warming potential	-2.1	kg CO2-eq/kg	1 kg of ethylene	-2.1
[40]	Unpacking bio-based alternatives to ethylene production in Brazil, Europe, and the United States: A comparative life cycle assessment	Ethylene	Yes	Propane steam cracking with processed beef tallow via HEFA with CO2 storage	IPCC Working Group I Sixth Assessment Report (GWP 100)	Global warming potential	13.97	kg CO2-eq/kg	1 kg of ethylene	13.97
[41]	Electrified steam cracking for a carbon neutral ethylene production process: Techno-economic analysis, life cycle assessment, and analytic hierarchy process	Ethylene	Yes	Case 1	GREET	Global warming potential	3.439	kg CO2-eq/kg	1 kg of ethylene	3.439
[41]	Electrified steam cracking for a carbon neutral ethylene production process: Techno-economic analysis, life cycle assessment, and analytic hierarchy process	Ethylene	Yes	Case 2	GREET	Global warming potential	3.731	kg CO2-eq/kg	1 kg of ethylene	3.731
[41]	Electrified steam cracking for a carbon neutral ethylene production process: Techno-economic analysis, life cycle assessment, and analytic hierarchy process	Ethylene	Yes	Case 3	GREET	Global warming potential	3.445	kg CO2-eq/kg	1 kg of ethylene	3.445
[41]	Electrified steam cracking for a carbon neutral ethylene production process: Techno-economic analysis, life cycle assessment, and analytic hierarchy process	Ethylene	Yes	Case 4	GREET	Global warming potential	3.259	kg CO2-eq/kg	1 kg of ethylene	3.259
[41]	Electrified steam cracking for a carbon neutral ethylene production process: Techno-economic analysis, life cycle assessment, and analytic hierarchy process	Ethylene	Yes	Case 5	GREET	Global warming potential	3.21	kg CO2-eq/kg	1 kg of ethylene	3.21
[41]	Electrified steam cracking for a carbon neutral ethylene production process: Techno-economic analysis, life cycle assessment, and analytic hierarchy process	Ethylene	Yes	Case 6	GREET	Global warming potential	3.21	kg CO2-eq/kg	1 kg of ethylene	3.21
[41]	Electrified steam cracking for a carbon neutral ethylene production process: Techno-economic analysis, life cycle assessment, and analytic hierarchy process	Ethylene	Yes	Case 7	GREET	Global warming potential	3.21	kg CO2-eq/kg	1 kg of ethylene	3.21
[41]	Electrified steam cracking for a carbon neutral ethylene production process: Techno-economic analysis, life cycle assessment, and analytic hierarchy process	Ethylene	Yes	Case 8	GREET	Global warming potential	4.351	kg CO2-eq/kg	1 kg of ethylene	4.351
[41]	Electrified steam cracking for a carbon neutral ethylene production process: Techno-economic analysis, life cycle assessment, and analytic hierarchy process	Ethylene	Yes	Case 9	GREET	Global warming potential	6.275	kg CO2-eq/kg	1 kg of ethylene	6.275
[41]	Electrified steam cracking for a carbon neutral ethylene production process: Techno-economic analysis, life cycle assessment, and analytic hierarchy process	Ethylene	Yes	Case 10	GREET	Global warming potential	4.391	kg CO2-eq/kg	1 kg of ethylene	4.391
[41]	Electrified steam cracking for a carbon neutral ethylene production process: Techno-economic analysis, life cycle assessment, and analytic hierarchy process	Ethylene	Yes	Case 11	GREET	Global warming potential	3.167	kg CO2-eq/kg	1 kg of ethylene	3.167
[41]	Electrified steam cracking for a carbon neutral ethylene production process: Techno-economic analysis, life cycle assessment, and analytic hierarchy process	Ethylene	Yes	Case 12	GREET	Global warming potential	2.842	kg CO2-eq/kg	1 kg of ethylene	2.842
[41]	Electrified steam cracking for a carbon neutral ethylene production process: Techno-economic analysis, life cycle assessment, and analytic hierarchy process	Ethylene	Yes	Case 13	GREET	Global warming potential	2.842	kg CO2-eq/kg	1 kg of ethylene	2.842
[41]	Electrified steam cracking for a carbon neutral ethylene production process: Techno-economic analysis, life cycle assessment, and analytic hierarchy process	Ethylene	Yes	Case 14	GREET	Global warming potential	2.842	kg CO2-eq/kg	1 kg of ethylene	2.842
[42]	Environmental impacts of ethylene production from diverse feedstocks and energy sources	Ethylene	Yes	Naphtha	TRACI	Global warming potential	198	kg CO2-eq. (millions)	400,000 t of ethylene	0.495		Revised by human
[42]	Environmental impacts of ethylene production from diverse feedstocks and energy sources	Ethylene	Yes	Ethane	TRACI	Global warming potential	167	kg CO2-eq. (millions)	400,000 t of ethylene	0.4175		Revised by human
[42]	Environmental impacts of ethylene production from diverse feedstocks and energy sources	Ethylene	Yes	Ethanol	TRACI	Global warming potential	268	kg CO2-eq. (millions)	400,000 t of ethylene	0.67		Revised by human
[43]	Environmental sustainability assessment of an ethylene oxide production process through Cumulative Exergy Demand and ReCiPe	Ethylene oxide	Yes	Scenario 1	ReCiPe 2008	Global warming potential	9.47e-09	species.yr (SY)	1 kg of ethylene oxide
[43]	Environmental sustainability assessment of an ethylene oxide production process through Cumulative Exergy Demand and ReCiPe	Ethylene oxide	Yes	Scenario 2	ReCiPe 2008	Global warming potential	9.39e-09	species.yr (SY)	1 kg of ethylene oxide
[43]	Environmental sustainability assessment of an ethylene oxide production process through Cumulative Exergy Demand and ReCiPe	Ethylene oxide	Yes	Scenario 7	ReCiPe 2008	Global warming potential	7.36e-09	species.yr (SY)	1 kg of ethylene oxide
[44]	Life cycle assessment of a novel electrocatalytic process for the production of bulk chemical ethylene oxide from biogenic CO2	Ethylene oxide	Yes	Optimized process conditions	CML 2001	Global warming potential	-0.5	kg CO2-eq/kg	1 kg of ethylene oxide	-0.5
[44]	Life cycle assessment of a novel electrocatalytic process for the production of bulk chemical ethylene oxide from biogenic CO2	Ethylene oxide	Yes	European grid mix	CML 2001	Global warming potential	3.62	kg CO2-eq/kg	1 kg of ethylene oxide	3.62
[44]	Life cycle assessment of a novel electrocatalytic process for the production of bulk chemical ethylene oxide from biogenic CO2	Ethylene oxide	Yes	H2O2-based approach	CML 2001	Global warming potential	4.11	kg CO2-eq/kg	1 kg of ethylene oxide	4.11
[45]	Comparative Life Cycle Assessment of Energy Consumption, Pollutant Emission, and Cost Analysis of Coal/Oil/Biomass to Ethylene Glycol	Ethylene glycol	Yes	CtEG	Not mentioned	Global warming potential	7538	kg CO2-eq/t	1 t of ethylene glycol	7538
[46]	Advancing development of biochemicals through the comprehensive evaluation of bio-ethylene glycol	Ethylene glycol	Yes	Bio-EG	Not mentioned	Global warming potential	0.8	t CO2-eq/t	1 t of ethylene glycol	0.8
[47]	Production routes to bio-acetic acid: life cycle assessment	Acetic acid	Yes	EAX OC	Not mentioned	Global warming potential	1000	kg CO2-eq/t	1 t of acetic acid	1
[47]	Production routes to bio-acetic acid: life cycle assessment	Acetic acid	Yes	EAX LE	Not mentioned	Global warming potential	2500	kg CO2-eq/t	1 t of acetic acid	2.5
[47]	Production routes to bio-acetic acid: life cycle assessment	Acetic acid	Yes	ADX OC	Not mentioned	Global warming potential	-370	kg CO2-eq/t	1 t of acetic acid	-0.37
[47]	Production routes to bio-acetic acid: life cycle assessment	Acetic acid	Yes	ADX LE	Not mentioned	Global warming potential	180	kg CO2-eq/t	1 t of acetic acid	0.18
[48]	Classical and Process Intensification Methods for Acetic Acid Concentration: Technical and Environmental Assessment	Acetic acid	Yes	Sub-case 4.1	ReCiPe	Global warming potential	10.95	kg CO2-eq/kg	1 kg of acetic acid	10.95
[48]	Classical and Process Intensification Methods for Acetic Acid Concentration: Technical and Environmental Assessment	Acetic acid	Yes	Sub-case 4.2	ReCiPe	Global warming potential	10.88	kg CO2-eq/kg	1 kg of acetic acid	10.88
[48]	Classical and Process Intensification Methods for Acetic Acid Concentration: Technical and Environmental Assessment	Acetic acid	Yes	Sub-case 4.3	ReCiPe	Global warming potential	10.92	kg CO2-eq/kg	1 kg of acetic acid	10.92
[48]	Classical and Process Intensification Methods for Acetic Acid Concentration: Technical and Environmental Assessment	Acetic acid	Yes	Sub-case 4.4	ReCiPe	Global warming potential	10.8	kg CO2-eq/kg	1 kg of acetic acid	10.8
[48]	Classical and Process Intensification Methods for Acetic Acid Concentration: Technical and Environmental Assessment	Acetic acid	Yes	Sub-case 4.5	ReCiPe	Global warming potential	10.38	kg CO2-eq/kg	1 kg of acetic acid	10.38
[48]	Classical and Process Intensification Methods for Acetic Acid Concentration: Technical and Environmental Assessment	Acetic acid	Yes	Sub-case 5.1	ReCiPe	Global warming potential	5.22	kg CO2-eq/kg	1 kg of acetic acid	5.22
[48]	Classical and Process Intensification Methods for Acetic Acid Concentration: Technical and Environmental Assessment	Acetic acid	Yes	Sub-case 5.2	ReCiPe	Global warming potential	5.12	kg CO2-eq/kg	1 kg of acetic acid	5.12
[48]	Classical and Process Intensification Methods for Acetic Acid Concentration: Technical and Environmental Assessment	Acetic acid	Yes	Sub-case 5.3	ReCiPe	Global warming potential	5.12	kg CO2-eq/kg	1 kg of acetic acid	5.12
[48]	Classical and Process Intensification Methods for Acetic Acid Concentration: Technical and Environmental Assessment	Acetic acid	Yes	Sub-case 5.4	ReCiPe	Global warming potential	4.93	kg CO2-eq/kg	1 kg of acetic acid	4.93
[48]	Classical and Process Intensification Methods for Acetic Acid Concentration: Technical and Environmental Assessment	Acetic acid	Yes	Sub-case 5.5	ReCiPe	Global warming potential	4.41	kg CO2-eq/kg	1 kg of acetic acid	4.41
[49]	Microbial electrosynthesis: is it sustainable for bioproduction of acetic acid?	Acetic acid	Yes	Scenario 1 (continuous mode) MES with 3D-GFCF	IPCC 2013 GWP 100a	Global warming potential	11.8	kg CO2-eq/kg	1000 t of acetic acid	11.8
[49]	Microbial electrosynthesis: is it sustainable for bioproduction of acetic acid?	Acetic acid	Yes	Scenario 2 (continuous mode) MES with 3D-GFCF	IPCC 2013 GWP 100a	Global warming potential	1.31	kg CO2-eq/kg	1000 t of acetic acid	1.31
[49]	Microbial electrosynthesis: is it sustainable for bioproduction of acetic acid?	Acetic acid	Yes	Scenario 3 (fed-batch mode) MES with 3D-GFCF	IPCC 2013 GWP 100a	Global warming potential	12.3	kg CO2-eq/kg	1000 t of acetic acid	12.3
[49]	Microbial electrosynthesis: is it sustainable for bioproduction of acetic acid?	Acetic acid	Yes	Scenario 4 (fed-batch mode) MES with 3D-GFCF	IPCC 2013 GWP 100a	Global warming potential	1.81	kg CO2-eq/kg	1000 t of acetic acid	1.81
[49]	Microbial electrosynthesis: is it sustainable for bioproduction of acetic acid?	Acetic acid	Yes	Fossil-based system Celanese process	IPCC 2013 GWP 100a	Global warming potential	1.31	kg CO2-eq/kg	1000 t of acetic acid	1.31
[50]	Environmental Burdens of China's Propylene manufacturing: Comparative life-cycle assessment and scenario analysis	Propylene	Yes	CTO	Midpoint method	Global warming potential	10082	kg CO2-eq/t	1 t of propylene	10.082
[50]	Environmental Burdens of China's Propylene manufacturing: Comparative life-cycle assessment and scenario analysis	Propylene	Yes	SC	Midpoint method	Global warming potential	1830	kg CO2-eq/t	1 t of propylene	1.83
[50]	Environmental Burdens of China's Propylene manufacturing: Comparative life-cycle assessment and scenario analysis	Propylene	Yes	CC	Midpoint method	Global warming potential	964	kg CO2-eq/t	1 t of propylene	0.964
[51]	Life cycle assessment of primary energy demand and greenhouse gas (GHG) emissions of four propylene production pathways in China	Propylene	Yes	Catalytic cracking (CC)	IPCC 2007	Global warming potential	1.6	t CO2-eq/t	1 t of propylene	1.6
[51]	Life cycle assessment of primary energy demand and greenhouse gas (GHG) emissions of four propylene production pathways in China	Propylene	Yes	Stream cracking (SC)	IPCC 2007	Global warming potential	2.06	t CO2-eq/t	1 t of propylene	2.06
[51]	Life cycle assessment of primary energy demand and greenhouse gas (GHG) emissions of four propylene production pathways in China	Propylene	Yes	Coal-to-olefins (CTO)	IPCC 2007	Global warming potential	12.16	t CO2-eq/t	1 t of propylene	12.16
[51]	Life cycle assessment of primary energy demand and greenhouse gas (GHG) emissions of four propylene production pathways in China	Propylene	Yes	Coal-to-propylene (CTP)	IPCC 2007	Global warming potential	9.23	t CO2-eq/t	1 t of propylene	9.23
[52]	What is the best green propylene production pathway?: technical, economic, and environmental assessment	Propylene	Yes	MTP via indirect MeOH synthesis	Not mentioned	Global warming potential	923.73	kg CO2-eq/t	1 t of propylene	0.92373
[52]	What is the best green propylene production pathway?: technical, economic, and environmental assessment	Propylene	Yes	MTP via direct MeOH synthesis	Not mentioned	Global warming potential	427.58	kg CO2-eq/t	1 t of propylene	0.42758
[52]	What is the best green propylene production pathway?: technical, economic, and environmental assessment	Propylene	Yes	MTP from natural gas	Not mentioned	Global warming potential	16.4	kg CO2-eq/t	1 t of propylene	16.4
[52]	What is the best green propylene production pathway?: technical, economic, and environmental assessment	Propylene	Yes	MTP from coal	Not mentioned	Global warming potential	4.3	kg CO2-eq/t	1 t of propylene	4.3
[52]	What is the best green propylene production pathway?: technical, economic, and environmental assessment	Propylene	Yes	Propane dehydrogenation	Not mentioned	Global warming potential	2.2	kg CO2-eq/t	1 t of propylene	2.2
[52]	What is the best green propylene production pathway?: technical, economic, and environmental assessment	Propylene	Yes	Naphtha cracking	Not mentioned	Global warming potential	1.6	kg CO2-eq/t	1 t of propylene	1.6
[53]	Exergy-aided environmental life cycle assessment of propylene oxide production	Propylene oxide	Yes	Base-case scenario	ReCiPe	Global warming potential	2.77e-06	DALY (Human health-climate change)	1 kg of propylene oxide
[55]	High-Value Propylene Glycol from Low-Value Biodiesel Glycerol: A Techno-Economic and Environmental Assessment under Uncertainty	Propylene glycol	Yes	BAU	CML 2001	Global warming potential	4.8	kg CO2-eq/kg	1 kg of propylene glycol	4.8
[55]	High-Value Propylene Glycol from Low-Value Biodiesel Glycerol: A Techno-Economic and Environmental Assessment under Uncertainty	Propylene glycol	Yes	GB-1	CML 2001	Global warming potential	4.5	kg CO2-eq/kg	1 kg of propylene glycol	4.5
[55]	High-Value Propylene Glycol from Low-Value Biodiesel Glycerol: A Techno-Economic and Environmental Assessment under Uncertainty	Propylene glycol	Yes	GB-2	CML 2001	Global warming potential	1.85	kg CO2-eq/kg	1 kg of propylene glycol	1.85
[56]	Life cycle analysis of renewable natural gas and lactic acid production from waste feedstocks	Lactic acid	Yes	RNG from sludge	GREET model, GWP 100 from IPCC	Global warming potential	27	g CO2-eq/MJ	1 kg of lactic acid
[56]	Life cycle analysis of renewable natural gas and lactic acid production from waste feedstocks	Lactic acid	Yes	RNG from food waste	GREET model, GWP 100 from IPCC	Global warming potential	-87	g CO2-eq/MJ	1 kg of lactic acid
[56]	Life cycle analysis of renewable natural gas and lactic acid production from waste feedstocks	Lactic acid	Yes	RNG from swine manure	GREET model, GWP 100 from IPCC	Global warming potential	-146	g CO2-eq/MJ	1 kg of lactic acid
[56]	Life cycle analysis of renewable natural gas and lactic acid production from waste feedstocks	Lactic acid	Yes	RNG from FOG	GREET model, GWP 100 from IPCC	Global warming potential	-68	g CO2-eq/MJ	1 kg of lactic acid
[56]	Life cycle analysis of renewable natural gas and lactic acid production from waste feedstocks	Lactic acid	Yes	LA from sludge	GREET model, GWP 100 from IPCC	Global warming potential	-1.4	kg CO2-eq/kg	1 kg of lactic acid	-1.4
[56]	Life cycle analysis of renewable natural gas and lactic acid production from waste feedstocks	Lactic acid	Yes	LA from food waste	GREET model, GWP 100 from IPCC	Global warming potential	-4.2	kg CO2-eq/kg	1 kg of lactic acid	-4.2
[56]	Life cycle analysis of renewable natural gas and lactic acid production from waste feedstocks	Lactic acid	Yes	LA from swine manure	GREET model, GWP 100 from IPCC	Global warming potential	-4.9	kg CO2-eq/kg	1 kg of lactic acid	-4.9
[56]	Life cycle analysis of renewable natural gas and lactic acid production from waste feedstocks	Lactic acid	Yes	LA from FOG	GREET model, GWP 100 from IPCC	Global warming potential	-2.2	kg CO2-eq/kg	1 kg of lactic acid	-2.2
[57]	Environmental hotspots of lactic acid production systems	Lactic acid	Yes	Lactic acid from corn	ReCiPe 2016	Global warming potential	4.19	kg CO2-eq/kg	1 kg of lactic acid	4.19
[57]	Environmental hotspots of lactic acid production systems	Lactic acid	Yes	Lactic acid from corn stover	ReCiPe 2016	Global warming potential	7.9	kg CO2-eq/kg	1 kg of lactic acid	7.9
[57]	Environmental hotspots of lactic acid production systems	Lactic acid	Yes	Lactic acid from Laminaria sp.	ReCiPe 2016	Global warming potential	11	kg CO2-eq/kg	1 kg of lactic acid	11
[58]	Biological valorization of natural gas for the production of lactic acid: Techno-economic analysis and life cycle assessment	Lactic acid	Yes	Lactic acid	TRACI	Global warming potential	8.98	kg CO2-eq/kg	1 kg of lactic acid	8.98
[59]	Relay photo/thermal catalysis enables efficient cascade upgrading of sugars to lactic acid: Mechanism study and life cycle assessment	Lactic acid	Yes	Biobased-LA	TRACI	Global warming potential	2.97	kg CO2-eq/kg	1 kg of lactic acid	2.97
[59]	Relay photo/thermal catalysis enables efficient cascade upgrading of sugars to lactic acid: Mechanism study and life cycle assessment	Lactic acid	Yes	Conventional LA	TRACI	Global warming potential	4.3	kg CO2-eq/kg	1 kg of lactic acid	4.3
[62]	Environmental impact assessment of lignocellulosic lactic acid production: Integrated with existing sugar mills	Lactic acid	Yes	Biobased LA	ReCiPe Midpoint(H)	Global warming potential	412.5	kg CO2-eq/t	1 t of lactic acid	0.4125
[62]	Environmental impact assessment of lignocellulosic lactic acid production: Integrated with existing sugar mills	Lactic acid	Yes	Fossil based LA	ReCiPe Midpoint(H)	Global warming potential	4338.14	kg CO2-eq/t	1 t of lactic acid	4.33814
[63]	Life cycle and economic assessment of sugarcane bagasse valorization to lactic acid	Lactic acid	Yes	Base case	ReCiPe 2016	Global warming potential	4.62	kg CO2-eq/kg	1 kg of lactic acid	4.62
[63]	Life cycle and economic assessment of sugarcane bagasse valorization to lactic acid	Lactic acid	Yes	Scenario-4	ReCiPe 2016	Global warming potential	5.54	kg CO2-eq/kg	1 kg of lactic acid	5.54
[63]	Life cycle and economic assessment of sugarcane bagasse valorization to lactic acid	Lactic acid	Yes	Optimistic scenario	ReCiPe 2016	Global warming potential	2.29	kg CO2-eq/kg	1 kg of lactic acid	2.29
[64]	To what extent do geopolitical conditions affect the environmental sustainability of the circular economy? A comparative LCA study of lactic acid production in Denmark and Iran	Lactic acid	Yes	Sc1-DK	ReCiPe 2016 v1.1 hierarchical version	Global warming potential	4186	kg CO2-eq/t	1 t of lactic acid	4186
[64]	To what extent do geopolitical conditions affect the environmental sustainability of the circular economy? A comparative LCA study of lactic acid production in Denmark and Iran	Lactic acid	Yes	Sc2-DK	ReCiPe 2016 v1.1 hierarchical version	Global warming potential	3091	kg CO2-eq/t	1 t of lactic acid	3.091
[64]	To what extent do geopolitical conditions affect the environmental sustainability of the circular economy? A comparative LCA study of lactic acid production in Denmark and Iran	Lactic acid	Yes	Sc3-DK	ReCiPe 2016 v1.1 hierarchical version	Global warming potential	3997	kg CO2-eq/t	1 t of lactic acid	3.997
[64]	To what extent do geopolitical conditions affect the environmental sustainability of the circular economy? A comparative LCA study of lactic acid production in Denmark and Iran	Lactic acid	Yes	Sc1-IR	ReCiPe 2016 v1.1 hierarchical version	Global warming potential	-12614	kg CO2-eq/t	1 t of lactic acid	-12.614
[64]	To what extent do geopolitical conditions affect the environmental sustainability of the circular economy? A comparative LCA study of lactic acid production in Denmark and Iran	Lactic acid	Yes	Sc2-IR	ReCiPe 2016 v1.1 hierarchical version	Global warming potential	-9273	kg CO2-eq/t	1 t of lactic acid	-9.273
[64]	To what extent do geopolitical conditions affect the environmental sustainability of the circular economy? A comparative LCA study of lactic acid production in Denmark and Iran	Lactic acid	Yes	Sc3-IR	ReCiPe 2016 v1.1 hierarchical version	Global warming potential	-15953	kg CO2-eq/t	1 t of lactic acid	-15.953
[65]	Valorization of sugarcane bagasse to lactic acid: Life cycle assessment and Techno-economic evaluation in Indian scenario	Lactic acid	Yes	Bagasse-based LA process	ReCiPe Midpoint (H)	Global warming potential	4.62	kg CO2-eq/kg	1 kg of lactic acid	4.62
[66]	Sustainable Lactic Acid Production from Lignocellulosic Biomass	Lactic acid	Yes	Baseline	Not mentioned	Global warming potential	5.92	kg CO2-eq/kg	1 kg of lactic acid	5.92
[66]	Sustainable Lactic Acid Production from Lignocellulosic Biomass	Lactic acid	Yes	With 25% renewable natural gas and 25% biomass diversion	Not mentioned	Global warming potential	2.79	kg CO2-eq/kg	1 kg of lactic acid	2.79
[66]	Sustainable Lactic Acid Production from Lignocellulosic Biomass	Lactic acid	Yes	Low-pH fermentation scenario	Not mentioned	Global warming potential	3.08	kg CO2-eq/kg	1 kg of lactic acid	3.08
[68]	Sustainable Production of Acrylic Acid via 3-Hydroxypropionic Acid from Lignocellulosic Biomass	Acrylic acid	Yes	Baseline scenario	Not mentioned	Global warming potential	3.9	kg CO2-eq/kg	1 kg of acrylic acid	3.9
[68]	Sustainable Production of Acrylic Acid via 3-Hydroxypropionic Acid from Lignocellulosic Biomass	Acrylic acid	Yes	Improved scenario	Not mentioned	Global warming potential	3	kg CO2-eq/kg	1 kg of acrylic acid	3
[68]	Sustainable Production of Acrylic Acid via 3-Hydroxypropionic Acid from Lignocellulosic Biomass	Acrylic acid	Yes	Low-pH fermentation scenario	Not mentioned	Global warming potential	2.3	kg CO2-eq/kg	1 kg of acrylic acid	2.3
[69]	Life Cycle Analysis applied to acrylic acid production process with different fuels for steam generation	Acrylic acid	Yes	Case 1	CML 2001	Global warming potential	3877	kg CO2-eq/t	1 t of acrylic acid	3.877
[69]	Life Cycle Analysis applied to acrylic acid production process with different fuels for steam generation	Acrylic acid	Yes	Case 2	CML 2001	Global warming potential	5525	kg CO2-eq/t	1 t of acrylic acid	5.525
[69]	Life Cycle Analysis applied to acrylic acid production process with different fuels for steam generation	Acrylic acid	Yes	Case 3	CML 2001	Global warming potential	5528.65	kg CO2-eq/t	1 t of acrylic acid	5.52865
[69]	Life Cycle Analysis applied to acrylic acid production process with different fuels for steam generation	Acrylic acid	Yes	Case 4	CML 2001	Global warming potential	4756.04	kg CO2-eq/t	1 t of acrylic acid	4.75604
[69]	Life Cycle Analysis applied to acrylic acid production process with different fuels for steam generation	Acrylic acid	Yes	Case 5	CML 2001	Global warming potential	4648.08	kg CO2-eq/t	1 t of acrylic acid	4.64808
[69]	Life Cycle Analysis applied to acrylic acid production process with different fuels for steam generation	Acrylic acid	Yes	Case 6	CML 2001	Global warming potential	1094.5	kg CO2-eq/t	1 t of acrylic acid	1.0945
[69]	Life Cycle Analysis applied to acrylic acid production process with different fuels for steam generation	Acrylic acid	Yes	Case 7	CML 2001	Global warming potential	1790.43	kg CO2-eq/t	1 t of acrylic acid	1.79043
[69]	Life Cycle Analysis applied to acrylic acid production process with different fuels for steam generation	Acrylic acid	Yes	Case 8	CML 2001	Global warming potential	2486.05	kg CO2-eq/t	1 t of acrylic acid	2.48605
[69]	Life Cycle Analysis applied to acrylic acid production process with different fuels for steam generation	Acrylic acid	Yes	Case 9	CML 2001	Global warming potential	3181.67	kg CO2-eq/t	1 t of acrylic acid	3.18167
[69]	Life Cycle Analysis applied to acrylic acid production process with different fuels for steam generation	Acrylic acid	Yes	Case 10	CML 2001	Global warming potential	1673.45	kg CO2-eq/t	1 t of acrylic acid	1.67345
[70]	Glycerol as feedstock in the synthesis of chemicals: a life cycle analysis for acrolein production	Acrolein	Yes	Scenario A	ReCiPe 2008 and IPCC 2007	Global warming potential	45.2	kg CO2-eq/kg	1 kg of acrolein	45.2
[70]	Glycerol as feedstock in the synthesis of chemicals: a life cycle analysis for acrolein production	Acrolein	Yes	Scenario B	ReCiPe 2008 and IPCC 2007	Global warming potential	49.7	kg CO2-eq/kg	1 kg of acrolein	49.7
[71]	Environmental Feasibility Analysis for the Acrylonitrile Production from Glycerol	Acrylonitrile	Yes	Route 1-MT SB	IPCC 2010	Global warming potential	2.23	kg CO2-eq/kg	1 kg of acrylonitrile	2.23
[71]	Environmental Feasibility Analysis for the Acrylonitrile Production from Glycerol	Acrylonitrile	Yes	Route 2-MT SB	IPCC 2010	Global warming potential	2.24	kg CO2-eq/kg	1 kg of acrylonitrile	2.24
[71]	Environmental Feasibility Analysis for the Acrylonitrile Production from Glycerol	Acrylonitrile	Yes	Route 3-WCO	IPCC 2010	Global warming potential	2.23	kg CO2-eq/kg	1 kg of acrylonitrile	2.23
[71]	Environmental Feasibility Analysis for the Acrylonitrile Production from Glycerol	Acrylonitrile	Yes	Route 4-Res	IPCC 2010	Global warming potential	1.96	kg CO2-eq/kg	1 kg of acrylonitrile	1.96
[72]	Assessing energy performance of bio-based succinic acid production using LCA	Succinic acid	Yes	Bio-SAC	IPCC (GWP 100a) 2007	Global warming potential	0.87	kg CO2-eq/kg	1 kg of succinic acid	0.87
[73]	Greenhouse gas emissions and non-renewable energy use profiles of bio-based succinic acid from Arundo donax L. lignocellulosic feedstock	Succinic acid	Yes	GR bio-SA	IPCC v1.02 (GWP 100a)	Global warming potential	3.9	kg CO2-eq/kg	1 kg of succinic acid	3.9
[73]	Greenhouse gas emissions and non-renewable energy use profiles of bio-based succinic acid from Arundo donax L. lignocellulosic feedstock	Succinic acid	Yes	Net GWP	IPCC v1.02 (GWP 100a)	Global warming potential	2	kg CO2-eq/kg	1 kg of succinic acid	2
[74]	Life Cycle Analysis of Succinic Acid Production in the Brazilian Biorefinery Context	Succinic acid	Yes	1st Scenario	ReCiPe	Global warming potential	0.195	kg CO2-eq/kg	1 kg of succinic acid	0.195
[74]	Life Cycle Analysis of Succinic Acid Production in the Brazilian Biorefinery Context	Succinic acid	Yes	2nd Scenario	ReCiPe	Global warming potential	1.94	kg CO2-eq/kg	1 kg of succinic acid	1.94
[74]	Life Cycle Analysis of Succinic Acid Production in the Brazilian Biorefinery Context	Succinic acid	Yes	3rd Scenario	ReCiPe	Global warming potential	1.34	kg CO2-eq/kg	1 kg of succinic acid	1.34
[74]	Life Cycle Analysis of Succinic Acid Production in the Brazilian Biorefinery Context	Succinic acid	Yes	4th Scenario	ReCiPe	Global warming potential	4.53	kg CO2-eq/kg	1 kg of succinic acid	4.53
[75]	Life cycle analysis of fermentative production of succinic acid from bread waste	Succinic acid	Yes	SA production by bread waste fermentation	IPCC 2013 GWP 100a	Global warming potential	1.3	kg CO2-eq/kg	1 kg of succinic acid	1.3
[75]	Life cycle analysis of fermentative production of succinic acid from bread waste	Succinic acid	Yes	SA production by dextrose	IPCC 2013 GWP 100a	Global warming potential	0.88	kg CO2-eq/kg	1 kg of succinic acid	0.88
[75]	Life cycle analysis of fermentative production of succinic acid from bread waste	Succinic acid	Yes	SA production by sorghum grains	IPCC 2013 GWP 100a	Global warming potential	0.87	kg CO2-eq/kg	1 kg of succinic acid	0.87
[75]	Life cycle analysis of fermentative production of succinic acid from bread waste	Succinic acid	Yes	Fossil-based SA production	IPCC 2013 GWP 100a	Global warming potential	1.94	kg CO2-eq/kg	1 kg of succinic acid	1.94
[77]	Techno-economic and environmental sustainability assessment of succinic acid production from municipal biowaste using an electrochemical membrane bioreactor	Succinic acid	Yes	Case 1	CML2001 (Jan. 2016)	Global warming potential	0.81	kg CO2-eq/kg	1 kg of succinic acid	0.81
[77]	Techno-economic and environmental sustainability assessment of succinic acid production from municipal biowaste using an electrochemical membrane bioreactor	Succinic acid	Yes	Case 2	CML2001 (Jan. 2016)	Global warming potential	1.39	kg CO2-eq/kg	1 kg of succinic acid	1.39
[78]	Economic and Environmental Assessment of Succinic Acid Production from Sugarcane Bagasse	Succinic acid	Yes	Succinic acid	ReCiPe (H) midpoint method	Global warming potential	1.39	kg CO2-eq/kg	1 kg of succinic acid	1.39
[78]	Economic and Environmental Assessment of Succinic Acid Production from Sugarcane Bagasse	Succinic acid	Yes	Electricity grid mix in India	ReCiPe (H) midpoint method	Global warming potential	4.3	kg CO2-eq/kg	1 kg of succinic acid	4.3
[80]	Life cycle assessment of butanol production in sugarcane biorefineries in Brazil	Butanol	Yes	Scenario 1G2GRS	CML 2 Baseline 2000 v2.05	Global warming potential	1.65	kg CO2-eq/kg	1 kg of butanol	1.65
[80]	Life cycle assessment of butanol production in sugarcane biorefineries in Brazil	Butanol	Yes	Scenario 1G2GMS	CML 2 Baseline 2000 v2.05	Global warming potential	1.03	kg CO2-eq/kg	1 kg of butanol	1.03
[81]	Catalytic Biorefining of Ethanol from Wine Waste to Butanol and Higher Alcohols: Modeling the Life Cycle Assessment and Process Design	Butanol	Yes	Biobased butanol from EtOH, with NaOH	IMPACT 2002+	Global warming potential	9	kg CO2-eq/kg	1 kg of butanol	9
[81]	Catalytic Biorefining of Ethanol from Wine Waste to Butanol and Higher Alcohols: Modeling the Life Cycle Assessment and Process Design	Butanol	Yes	Biobased butanol from EtOH, with NaOEt	IMPACT 2002+	Global warming potential	6	kg CO2-eq/kg	1 kg of butanol	6
[81]	Catalytic Biorefining of Ethanol from Wine Waste to Butanol and Higher Alcohols: Modeling the Life Cycle Assessment and Process Design	Butanol	Yes	Biobased butanol from EtOH, with NaOH (industrial scale up)	IMPACT 2002+	Global warming potential	7	kg CO2-eq/kg	1 kg of butanol	7
[81]	Catalytic Biorefining of Ethanol from Wine Waste to Butanol and Higher Alcohols: Modeling the Life Cycle Assessment and Process Design	Butanol	Yes	Biobased butanol from EtOH, with NaOEt (industrial scale up)	IMPACT 2002+	Global warming potential	5	kg CO2-eq/kg	1 kg of butanol	5
[82]	Economic and environmental assessment of n-butanol production in an integrated first and second generation sugarcane biorefinery: Fermentative versus catalytic routes	Butanol	Yes	Scenario ALCD	ReCiPe Midpoint (H) v1.05	Global warming potential	0.709	kg CO2-eq/kWh	1 kg of butanol
[82]	Economic and environmental assessment of n-butanol production in an integrated first and second generation sugarcane biorefinery: Fermentative versus catalytic routes	Butanol	Yes	Scenario ALCT	ReCiPe Midpoint (H) v1.05	Global warming potential	0.709	kg CO2-eq/kWh	1 kg of butanol
[82]	Economic and environmental assessment of n-butanol production in an integrated first and second generation sugarcane biorefinery: Fermentative versus catalytic routes	Butanol	Yes	Scenario ABEW	ReCiPe Midpoint (H) v1.05	Global warming potential	0.624	kg CO2-eq/kWh	1 kg of butanol
[82]	Economic and environmental assessment of n-butanol production in an integrated first and second generation sugarcane biorefinery: Fermentative versus catalytic routes	Butanol	Yes	Scenario ABEM	ReCiPe Midpoint (H) v1.05	Global warming potential	0.603	kg CO2-eq/kWh	1 kg of butanol
[83]	Techno-economic and Life-Cycle Assessment of One-Step Production of 1,3-Butadiene from Bioethanol Using Reaction Data under Industrial Operating Conditions	1,3-Butadiene	Yes	BD from naphtha	ReCiPe2016 midpoint (H) V1.02	Global warming potential	2518	kg CO2-eq/t	1 t of 1,3-Butadiene	2.518
[83]	Techno-economic and Life-Cycle Assessment of One-Step Production of 1,3-Butadiene from Bioethanol Using Reaction Data under Industrial Operating Conditions	1,3-Butadiene	Yes	B1EU	ReCiPe2016 midpoint (H) V1.02	Global warming potential	2247	kg CO2-eq/t	1 t of 1,3-Butadiene	2.247
[83]	Techno-economic and Life-Cycle Assessment of One-Step Production of 1,3-Butadiene from Bioethanol Using Reaction Data under Industrial Operating Conditions	1,3-Butadiene	Yes	B2EU	ReCiPe2016 midpoint (H) V1.02	Global warming potential	1854	kg CO2-eq/t	1 t of 1,3-Butadiene	1.854
[83]	Techno-economic and Life-Cycle Assessment of One-Step Production of 1,3-Butadiene from Bioethanol Using Reaction Data under Industrial Operating Conditions	1,3-Butadiene	Yes	B2BR	ReCiPe2016 midpoint (H) V1.02	Global warming potential	6351	kg CO2-eq/t	1 t of 1,3-Butadiene	6.351
[83]	Techno-economic and Life-Cycle Assessment of One-Step Production of 1,3-Butadiene from Bioethanol Using Reaction Data under Industrial Operating Conditions	1,3-Butadiene	Yes	B2BR	ReCiPe2016 midpoint (H) V1.02	Global warming potential	5315	kg CO2-eq/t	1 t of 1,3-Butadiene	5.315
[83]	Techno-economic and Life-Cycle Assessment of One-Step Production of 1,3-Butadiene from Bioethanol Using Reaction Data under Industrial Operating Conditions	1,3-Butadiene	Yes	B1USA	ReCiPe2016 midpoint (H) V1.02	Global warming potential	2770	kg CO2-eq/t	1 t of 1,3-Butadiene	2.77
[83]	Techno-economic and Life-Cycle Assessment of One-Step Production of 1,3-Butadiene from Bioethanol Using Reaction Data under Industrial Operating Conditions	1,3-Butadiene	Yes	B2USA	ReCiPe2016 midpoint (H) V1.02	Global warming potential	2307	kg CO2-eq/t	1 t of 1,3-Butadiene	2.307
[84]	Assessing the economic and environmental sustainability of bio-olefins: The case of 1,3-butadiene production from bioethanol	1,3-Butadiene	Yes	B1	ReCiPe 2016	Global warming potential	-0.07	kg CO2-eq/kg	1 t of 1,3-Butadiene	-0.07
[84]	Assessing the economic and environmental sustainability of bio-olefins: The case of 1,3-butadiene production from bioethanol	1,3-Butadiene	Yes	B2	ReCiPe 2016	Global warming potential	-0.05	kg CO2-eq/kg	1 t of 1,3-Butadiene	-0.05
[84]	Assessing the economic and environmental sustainability of bio-olefins: The case of 1,3-butadiene production from bioethanol	1,3-Butadiene	Yes	B3	ReCiPe 2016	Global warming potential	1.29	kg CO2-eq/kg	1 t of 1,3-Butadiene	1.29
[84]	Assessing the economic and environmental sustainability of bio-olefins: The case of 1,3-butadiene production from bioethanol	1,3-Butadiene	Yes	B4	ReCiPe 2016	Global warming potential	2.31	kg CO2-eq/kg	1 t of 1,3-Butadiene	2.31
[85]	Integrated techno-economic and environmental analysis of butadiene production from biomass	1,3-Butadiene	Yes	Scenario BD-biomass	CML-IA baseline 3.02	Global warming potential	72	kg CO2-eq/t	1 t of 1,3-Butadiene	0.072
[85]	Integrated techno-economic and environmental analysis of butadiene production from biomass	1,3-Butadiene	Yes	Scenario BD-naphtha	CML-IA baseline 3.02	Global warming potential	582	kg CO2-eq/t	1 t of 1,3-Butadiene	0.582
[86]	Butadiene from biomass, a life cycle perspective to address sustainability in the chemical industry	1,3-Butadiene	Yes	Sugarcane-based Lebedev process	ReCiPe	Global warming potential	2.04	t CO2-eq/t	1 t of 1,3-Butadiene	2.04
[truncated: 43 more rows]

## Sheet: Reference
New_ID	Title	Author	Published year	Doi
[truncated: 107 more rows]
