# Supplementary material for: From Literature to Knowledge Graphs: Automated Extraction and Retrieval of Life Cycle Assessment Data with Large Language Models
Source: Research Square preprint supplement (doi:10.21203/rs.3.rs-8633241/v1), 2026-01-27
Supplement: Supplementary file 3 [file 70f7691a74a68a59b855c296.xlsx]

## Sheet: LCI_title_dataset
Paper_title	Table_title	is LCI inventory table?
1	Table 1 Data summary related to conventional manufacturing	No
1	Table 2 Data summary related to additive manufacturing	No
1	Table 3 Main resource consumption and emissions in the life cycle of impeller manufacturing methods	Yes
1	Table 4 Normalization results of three manufacturing methods	No
2	Table 1 Range of figures of merit based on environmental assessments for the development of NH3-leaves	No
3	Table 1 Inputs and outputs associated with the production of 1 kg of refined mineral oil	Yes
3	Table 2 Fertilizers used for growing 1 hectare of rapeseed oil	No
3	Table 3 Pesticide used on a 1 hectare rapeseed crop	No
3	Table 4 Soil emissions per hectare per year	No
3	Table 5 Characterized data for mineral and rapeseed oil production	No
3	Table 6 Normalized data for the production of 1 kg of mineral oil and 1 kg of rapeseed oil	No
4	Table 1 Summary of main technical considerations in geothermal power plants (GPPs) in literature.	No
4	Table 2 Summary of main materials and energy in foreground life cycle inventory for geothermal power plants (GPPs) in literature.	Yes
4	Table 3 Stimulation methods and respective materials and energy ﬂows for geothermal power plants (GPPs) found in the literature.	No
5	Table 1 Overview of considered environmental impacts.	No
5	Table 2 LCI data DDSG turbine.	Yes
5	Table 3 LCI data DFIG and DDPMSG turbine.	Yes
5	Table 4 Failure and replacement rates.	No
5	Table 5 Design features, assumptions and results of LCA wind power studies.	No
6	Table 1 LCI data.	Yes
6	Table 2 CED values for all the phases considered in the three scenarios.	No
7	Table 1 Wastewater characteristics and treated effluent characteristics	No
7	Table 2 Contaminant removal efficiency of BOD, COD, TSS, and SS for each unit operation stage	No
7	Table 3 Overview of inventory data and assumptions for primary clarification, as well as aerobic and ultrafiltration treatment	Yes
8	Table 1 Profile of case studies of small wastewater treatment technologies.	No
8	Table 2 Data sources for life cycle inventory of wastewater treatment systems.	Yes
9	Table 1 Impact categories and indicators	No
9	Table 2 EV consumption rate according to Anair and Mahmassani	No
9	Table 3 Main characteristics of the considered ICEV and EV	No
9	Table 4 Main ICEV emission data	No
9	Table 5 LCIA results for 2013 scenario (complete vehicles lifetime - 150,000 km)	No
9	Table 7 LCIA results for 2030 scenario (complete vehicles lifetime - 150,000 km)	No
10	Table 1 Summary of inventory data used in this study	Yes
10	Table 2. Energy input required for cultivation, harvesting, storage and transport of ley crops	No
10	Table 3 General specifications of bio-methane fuelled and electric bus	No
10	Table 4 Sensitivity analysis	No
11	Table 1 Ratios of clinker in different types of cement (Ecofys, 2009 ).	No
11	Table 2 Scope of a cradle-to-gate method of cement production from different LCAs studies.	No
11	Table 3 Summary of the LCI of clinker and cement production from literature.	Yes
11	Table 4 Summary of LCIA accomplished from the literature.	No
11	Table 5 Summarizes LCA methodologies used in various studies extracted from the literature.	No
11	Table 6 Summarizes LCAs system boundaries (Cradle-to-gate) from the literature.	No
12	Table 1 Materials ﬂow of steel production in Poland enational integrated steel plant.	No
12	Table 2 Materials ﬂow of steel production in Poland enational electric arc furnaces (EAF).	No
12	Table 3 Life cycle inventory of national steel production enational integrated steel plant.	Yes
12	Table 4 Life cycle inventory of national steel production e national electric arc furnaces.	Yes
12	Table 5 Lower heating values (LHV) of fuels used in national steel plants.	No
12	Table 6 Results of the life cycle impact assessment of Polish steel production.	No
12	Table 7 Life cycle greenhouse gas emissions of Polish steel production (IPCC method).	No
12	Table 8 Energy demand of the Polish steel production system (CED method).	No
12	Table 10 Comparative analysis of steel production ’s energy requirements and carbon footprint.	No
12	Table 11 Comparative analysis of the environmental indicators for three iron ore sinter plant scenarios.	No
12	Table 12 Comparative analysis of the environmental indicators of alternative solid fuels.	No
13	Table 1 Inputs required to produce one ton of liquid steel from virgin iron; adapted from Yellishetty et al. (2011) .	Yes
13	Table 2 Life Cycle Global Warming Potential (GWP) results.	No
13	Table 3 Life cycle resource use results.	No
13	Table 4 Life cycle human health results.	No
13	Table 5 Life cycle ecosystem quality damage results.	No
13	Table 6 IMPACT 2002 þvalue comparison between stage 6 and stage 7.	No
13	Table 8 Ecosystem damage results by percentage (%) in Stage 2.	No
14	Table 1 Material types of steel-GluBam hybrid truss and steel truss.	No
14	Table 2 Specific equations of carbon emission in different phases.	No
14	Table 3 LCA inventory of steel-GluBam hybrid truss and steel truss.	Yes
14	Table 4 List of materials for production phase.	No
14	Table 5 Haul distance and transportation volume of materials.	No
14	Table 6 Source of carbon emission during construction.	No
14	Table 7 Lacquer consumption in 50 years.	No
14	Table 8 Source of carbon emission in the disposal phase.	No
14	Table 9 Carbon emission, energy consumption and cost of two trusses in the trans -	No
14	Table 10 Carbon emission, energy consumption and cost of two trusses in the construction	No
14	Table 11 Carbon emission, energy consumption and costs of different trusses in the	No
14	Table 12 Carbon emission, energy consumption and cost of two trusses in the disposal	No
14	Table 13 Statistical characteristics of Monte Carlo simulation results.	No
15	Table 1 Life cycle inventory. Values are presented per functional unit.	Yes
15	Table 2 LCA and WF analysis results. Values are presented per functional unit.	No
15	Table 3 Comparisons with clean production standard of ISI. Values are presented per	No
15	Table 4 Comparison of steel production. Values are presented per functional unit.	No
16	Table 1 Keyﬁndings and comparison among major LCA-related research on bauxite and aluminum production processes.	No
16	Table 2 World resource and production of bauxite, alumina, and aluminum smelter ( U.S. Geolog-	No
16	Table 3 Detailed inventories of the processes considered in aluminum production (inputs and outputs).	Yes
16	Table 4 Impact categories from TRACI method and the ILCD method.	No
16	Table 5 LCIA results from ILCD method (using SimaPro software version 8.5).	No
16	Table 6 LCIA results from TRACI method (using SimaPro software version 8.5).	No
16	Table 8 Sensitivity analysis results based on fuel consumption in alumina production.	No
16	Table 9 Sensitivity analysis results based on the source of electricity consumed in the alumina smelting process.	No
16	Table 11 Summary of the results for alumina production and smelting process from this research.	No
17	Table 1 Life cycle inventory. Values are presented per functional unit.	Yes
17	Table 3 IMPACT 2002 þend-point results and the contribution of most signi ﬁcant process to the end-point scores. Values are presented per functional unit.	No
17	Table 4 Sensitivity of main contributors.	No
17	Table 5 LCIA potential impact of aluminum production in different countries.	No
17	Table 7 Inputs for per ton primary aluminum production.	No
18	Table 1 Life cycle inventory. Values are presented per functional unit.	Yes
18	Table 2 Midpoint results of aluminum-silicon alloy production. Values are presented per	No
18	Table 3 Endpoint results and contributions of most significant processes. Values are presented per functional unit.	No
18	Table 4 Sensitivity analysis of main contributors.	No
18	Table 5 Environmental benefits under renewable power replacement.	No
18	Table 6 Reductions of characteristic values under electrode replacement.	No
19	Table 1 Variables used in techno-economic assessment.	No
19	Table 2 Composition of scraps in the raw scrap and price of individual components.	No
19	Table 3 Life cycle inventory data to produce 1 kg of aluminum from the mixed scrap.	Yes
19	Table 4 Life cycle inventory of components used in the process.	Yes
19	Table 5 Contributional analysis of different components used in the process.	No
19	Table 6 Comparison of environmental impact for other methods of aluminum production and recycle.	No
19	Table 7 Comparison of environmental impact for different materials considered for reactor construction.	No
20	Table 1 LCI of the AECs per FU in the production stage.	Yes
20	Table 2 LCIA results for 10 impact categories per FU.	No
20	Table 3 Sensitivity analysis results with 5% increase from baseline.	No
21	Table 1 Main inventory data per FU for transportation, pre-treatment and fast pyrolysis of poplar biomass (SS1-SS3).	Yes
21	Table 2 Main inventory data per FU for upgrading and product transportation (SS4-SS7).	Yes
21	Table 3 Mass and economic allocation factors for bio-oil production and upgrading.	No
21	Table 4 Environmental proﬁle of the gasoline and diesel products (results per FU).	No
21	Table 5 Process contribution (%) to the environmental proﬁle.	No
22	Table 1 Life cycle inventory of agricultural practices and inputs for both Danish and Italian casestudies [quantities are shown per hectare cultivated (ha); the unit “rep”refers to the num-	Yes
22	Table 2 Scenarios and the fertilisers and pesticides emissions models used	No
22	Table 3 List of main input parameters included in the model by Brentrup et al. (2000)	No
22	Table 4 List of main input parameters used in the PestLCI 2.0 model	No
22	Table 6 Prices and economic allocation factors for straw for Danish and Italian case studies.	No
23	Table 1 Life cycle inventory (LCI) of the organic and conventional lettuce cultivation systemsat Anthemountas basin (Northern Greece) per hectare of lettuce cultivation.	Yes
23	Table 2 ReCiPe midpoint and endpoint impact categories ( PR/C19e, 2014 ).	No
24	Table 1 Complete environmental-Life Cycle Inventory.	Yes
24	Table 2 Life Cycle Cost (LCC) information of transit buses with alternative fuel options (2013 Dollars).	No
25	Table 1 Inventory characteristics of WTP stage per 1 km of travel.	Yes
25	Table 2 Estimated fuel consumption and fuel emissions per 1 km of travel (PTW stage).	No
26	Table 1 Bill of materials of the bus models.	Yes
26	Table 2 Polish gross electricity generation forecast by fuel [%].	No
26	Table 4 Description of the scenarios investigated in the bus ﬂeet electri ﬁcation case study on	No
27	Table 1 GHG emissions of EVs and ICEVs in some studies.	No
27	Table 2 General information on e-bus and conventional bus in Vietnam.	No
27	Table 3 Environmental inflows and outflows of the product systems.	Yes
27	Table 4 Life cycle impact assessment results of an e-bus and a diesel bus per one pkm.	No
27	Table 5 Comparative environmental points of an e-bus and a diesel bus.	No
28	Table 1 Life cycle inventory (Values were presented per functional unit).	Yes
28	Table 2 LCIA midpoint results (Values were presented per functional unit).	No
28	Table 3 Comparison of gas extraction and gas drainage production modes (Values were presented per functional unit).	No
29	Table 1 Chemical properties of coal.	No
29	Table 2 Mass balance of an underground coal mine.	No
29	Table 3 Life cycle inventory of energetic coal. From “rooms and pillars ”technique and jig	Yes
30	Table 1 Life cycle inventory (Only total consumption or emissions of data are shown).	Yes
31	Table 1 Assumed composition (dry basis) of feedstock delivered to the reﬁnery gate.	No
31	Table 2 Data sources for the life cycle inventory of lignocellulosic ethanol manufacture.	Yes
31	Table 3 Global inventory for lignocellulosic ethanol production.	Yes
31	Table 4 Assumptions about delivery activities.	No
32	Table 1 Summary of the covered well-to-tank processes.	No
32	Table 2 Input and output data of the butanol manufacturing unit process for 1 kg of ABE.	Yes
32	Table 3 Input and output data for passenger car transport per km using the butanol-gasoline blend	Yes
32	Table 4 Main environmental impacts of the steam production process per driven km,	No
32	Table 5 LCIA of the tank-to-wheel phase, based on data for 2018.	No
33	Table 1 Inventory of CDW recycling and disposal.	Yes
33	Table 2 Inventory of production of three recycled products.	Yes
33	Table 3 LCC of masonry brick production.	No
33	Table 4 LCC of permeable brick production.	No
33	Table 5 LCC of thermal insulation block production.	No
33	Table 6 Characterisation results of three recycled products.	No
33	Table 7 Normalisation results of three recycled products.	No
33	Table 8 The proportion of main materials in the environmental impact of key processes.	No
34	Table 1 LCI energy use and air emissions data efor electricity generation (GreenConcrete LCA tool).	Yes
34	Table 2 LCI data for the cement production in the country of origin and transportation to Singapore.	Yes
34	Table 3 LCI data for the aggregates production in the country of origin and transportation to Singapore.	Yes
35	Table 1 Inventory of main input ﬂows to the CdTe module manufacturing process	Yes
35	Table 2 Inventory of main input ﬂows to the CIS module manufacturing process	Yes
35	Table 3 Inventory of main input ﬂows to the BOS per square metre of PV module	Yes
36	Table 1 Key inputs and outputs for unit processes.	Yes
36	Table 2 Net present values (NPV) for a plant (100 t TS/d) using different processes.	No
37	Table1 Life cycle inventory of a 200W PV panel and a 280W PV panel.	Yes
37	Table 2 Life cycle inventory of a 6 kW wind turbine.	Yes
37	Table 3 Life cycle inventory of a 960 Ah lead-calcium alloy	Yes
37	Table 4. Life cycle inventory of a 65 kW diesel generator.	Yes
38	Table 1 Allocation factors for the products of coal-based methanol production.	No
38	Table 2 Impact categories for the CML2001 and Eco-indicator 99 (EI99) models.	No
38	Table 3 Life-cycle inventory for the production of 1 t of coal-based methanol.	Yes
38	Table 4 Integral environmental impact assessment result at the mid-point level.	No
38	Table 5 Environmental performance at the end-point level.	No
38	Table 6 Characteristic values for the worst-case values for the coal gasi ﬁcation technology	No
39	Table 1 Inputs and outputs related to 1 h for the analysed process of methanol and electricity co-production.	Yes
39	Table 2 Allocation factors a ifor methanol and electricity determined based on the amount (moles)	No
39	Table 3 A comparison of life cycle GHG emissions generated through the production of 1 kg ofmethanol.	No
40	Table 1 Inventory data.	Yes
40	Table 2 Life cycle assessment results for methanol production.	No
40	Table 3 Life cycle assessment results in comparison for metals utilized in catalysts.	No
40	Table 4 Life cycle assessment comparison for electricity generation sources.	No
41	Table 1 Life cycle inventory (per functional unit) of egg yolk powder production.	Yes
41	Table 2 Environmental impacts of different stages in egg yolk powder manufacturing.	No
42	Table 1 LCI data for the biorefinery systems.	Yes
42	Table 2 The properties of ethanol, gasoline, E10 and E85.	No
42	Table 3 LCI data for crude oil extraction, transportation, refinery, blending with ethanol, and final use.	Yes
42	Table 4 Speciﬁc chemical exergy of components involved in the processes.	No
42	Table 6 Exergy-based allocation of lignocellulosic ethanol biore ﬁnery co-products.	No
42	Table 7 Life cycle GWP impacts for gasoline, E10 and E85 (g CO 2-eq/km).	No
42	Table 8 Life cycle GWP impacts of each system process stage for gasoline, E10 and E85 cases.	No
42	Table 9 Well-to-wheels GWP impacts (g CO 2-eq/km) comparison of E10 and E85 biofuels from the relevant literature.	No
43	Table 1 Sugarcane [12], molasses, ethanol production [4], gasoline consumption [13] and fuel ethanol requirement in India.	No
43	Table 2 Inventory of sugarcane farming for sugarcane production of 111.4 ton in NR and 88.2ton in WR to produce 1 ton of ethanol.	Yes
43	Table 3 Inventory of sugarcane (111.4 and 88.2 ton), molasses (5.0 and 4.0 ton) and ethanol (1 ton) transport in NR and WR.	Yes
43	Table 4 Inventory of sugar production for processing 111.4 (NR) and 88.2 (WR) ton sugarcanein mill to produce 1ton of ethanol.	Yes
43	Table 5 Inventory of ethanol production of 1 ton, blending 1 ton ethanol with gasoline.	Yes
43	Table 7 Mass, energy and market price for estimating product and co-products allocationfactor, for producing 1ton of ethanol.	No
43	Table 8 Process wise GHG emissions (kg CO 2-eq/ton of ethanol) in NR and WR.	No
43	Table 9 Process wise energy consumption (MJ/ton of ethanol) in NR and WR.	No
43	Table 10 Percent GHG emissions reduction and NER using E5 and E10 blends.	No
44	Table 1 List of inputs and outputs of the production of biodiesel from UCO.	Yes
44	Table 2 Environmental impact of the production of 1 ton of biodiesel from UCO.	No
44	Table 3 Ratio of chemical exergy to Low Heating Value of fuels.	No
44	Table 4 Environmental impact of 1 ton of biodiesel from UCO.	No
44	Table 5 Exergy Inputs (MJ) of the production of biodiesel (scenario 1).	No
44	Table 7 Environmental impact of 1 ton of biodiesel from UCO for 2006 and 2010.	No
45	Table 1 Inventory inputs of willow cultivation and harvesting.	Yes
45	Table 2 Inventory inputs of poplar cultivation and harvesting.	Yes
45	Table 3 Inventory inputs of logging residue cultivation and harvesting.	Yes
45	Table 4 Biomass transportation distances for power conversion systems.	No
45	Table 5 Inventory inputs of pyrolysis oil production from woody biomass feedstock.	Yes
45	Table 6 Plant size and efficiency of each power generation system.	No
45	Table 7 GHG emissions results of PyOil production from 4 biomass feedstocks.	No
46	Table 1 Life cycle inventory data to produce one ton of packaged canola edible oil.	Yes
46	Table 2 Coefﬁcients for computing on-farm emissions arising from application of chemical fertilizer and manure in canola production ( Mousavi-Avval et al., 2017a ).	No
46	Table 3 Conversion coef ﬁcients of emissions to applicable value ( Mousavi-	No
46	Table 4 Emission factors for air emissions from diesel fuel consumption based on Ecoinventdatabase.	No
46	Table 5 Environmental impact categories and their measurement units.	No
46	Table 6 Values of environmental impacts per one ton of packaged canola edible oil.	No
46	Table 7 Environmental hotspots in the production of packaged canola edible oil.	No
47	Table 1 The composition of coke oven gas in this study.	No
47	Table 2 The inputs and outputs of COG-based methanol production.	Yes
47	Table 3 The inputs and outputs of coal to methanol production.	Yes
47	Table 4 The inputs and outputs of natural gas to methanol production.	Yes
47	Table 5 Comparative analysis of the three methanol routes in energy consumption and global warming potential.	No
47	Table 6 Scenario analysis of COG route with MP steam supplement from CDQ technology.	No
48	Table 1 Inventory data for the production and processing of one tonne of dry seaweed into biofuels.	Yes
48	Table 2 Energy process balance for baseline scenarios referring to one tonne of dry seaweed.	No
48	Table 3 Results of the sensitivity analysis.	No
49	Table 1 Ethanol pathways ’ LCA results compared in different studies.	No
49	Table 2 Data inventory for LDG-ethanol process.	Yes
49	Table 3 Data inventory for Corn-ethanol and Coal-ethanol.	Yes
49	Table 4 Scenario description.	No
49	Table 5 LCA characterization results.	No
50	Table 1 Input and output ﬂows of WS-EtOH production referred to the selected Functional Unit (FU=1 km).	Yes
		162

## Sheet: Balanced_LCI_title_dataset
Paper_title	Table_title	is LCI inventory table?
1	Table 2 Data summary related to additive manufacturing	No
1	Table 3 Main resource consumption and emissions in the life cycle of impeller manufacturing methods	Yes
1	Table 4 Normalization results of three manufacturing methods	No
3	Table 1 Inputs and outputs associated with the production of 1 kg of refined mineral oil	Yes
3	Table 2 Fertilizers used for growing 1 hectare of rapeseed oil	No
4	Table 2 Summary of main materials and energy in foreground life cycle inventory for geothermal power plants (GPPs) in literature.	Yes
4	Table 3 Stimulation methods and respective materials and energy ﬂows for geothermal power plants (GPPs) found in the literature.	No
5	Table 1 Overview of considered environmental impacts.	No
5	Table 2 LCI data DDSG turbine.	Yes
5	Table 3 LCI data DFIG and DDPMSG turbine.	Yes
5	Table 4 Failure and replacement rates.	No
5	Table 5 Design features, assumptions and results of LCA wind power studies.	No
6	Table 1 LCI data.	Yes
6	Table 2 CED values for all the phases considered in the three scenarios.	No
7	Table 1 Wastewater characteristics and treated effluent characteristics	No
7	Table 3 Overview of inventory data and assumptions for primary clarification, as well as aerobic and ultrafiltration treatment	Yes
8	Table 1 Profile of case studies of small wastewater treatment technologies.	No
8	Table 2 Data sources for life cycle inventory of wastewater treatment systems.	Yes
9	Table 7 LCIA results for 2030 scenario (complete vehicles lifetime - 150,000 km)	No
10	Table 1 Summary of inventory data used in this study	Yes
10	Table 2. Energy input required for cultivation, harvesting, storage and transport of ley crops	No
10	Table 3 General specifications of bio-methane fuelled and electric bus	No
10	Table 4 Sensitivity analysis	No
11	Table 1 Ratios of clinker in different types of cement (Ecofys, 2009 ).	No
11	Table 2 Scope of a cradle-to-gate method of cement production from different LCAs studies.	No
11	Table 3 Summary of the LCI of clinker and cement production from literature.	Yes
11	Table 4 Summary of LCIA accomplished from the literature.	No
11	Table 5 Summarizes LCA methodologies used in various studies extracted from the literature.	No
11	Table 6 Summarizes LCAs system boundaries (Cradle-to-gate) from the literature.	No
12	Table 1 Materials ﬂow of steel production in Poland enational integrated steel plant.	No
12	Table 2 Materials ﬂow of steel production in Poland enational electric arc furnaces (EAF).	No
12	Table 3 Life cycle inventory of national steel production enational integrated steel plant.	Yes
12	Table 4 Life cycle inventory of national steel production e national electric arc furnaces.	Yes
13	Table 1 Inputs required to produce one ton of liquid steel from virgin iron; adapted from Yellishetty et al. (2011) .	Yes
13	Table 2 Life Cycle Global Warming Potential (GWP) results.	No
14	Table 2 Specific equations of carbon emission in different phases.	No
14	Table 3 LCA inventory of steel-GluBam hybrid truss and steel truss.	Yes
14	Table 12 Carbon emission, energy consumption and cost of two trusses in the disposal	No
14	Table 13 Statistical characteristics of Monte Carlo simulation results.	No
15	Table 1 Life cycle inventory. Values are presented per functional unit.	Yes
15	Table 2 LCA and WF analysis results. Values are presented per functional unit.	No
16	Table 2 World resource and production of bauxite, alumina, and aluminum smelter ( U.S. Geolog-	No
16	Table 3 Detailed inventories of the processes considered in aluminum production (inputs and outputs).	Yes
16	Table 4 Impact categories from TRACI method and the ILCD method.	No
16	Table 5 LCIA results from ILCD method (using SimaPro software version 8.5).	No
16	Table 11 Summary of the results for alumina production and smelting process from this research.	No
17	Table 1 Life cycle inventory. Values are presented per functional unit.	Yes
18	Table 1 Life cycle inventory. Values are presented per functional unit.	Yes
18	Table 2 Midpoint results of aluminum-silicon alloy production. Values are presented per	No
19	Table 1 Variables used in techno-economic assessment.	No
19	Table 2 Composition of scraps in the raw scrap and price of individual components.	No
19	Table 3 Life cycle inventory data to produce 1 kg of aluminum from the mixed scrap.	Yes
19	Table 4 Life cycle inventory of components used in the process.	Yes
20	Table 1 LCI of the AECs per FU in the production stage.	Yes
20	Table 2 LCIA results for 10 impact categories per FU.	No
20	Table 3 Sensitivity analysis results with 5% increase from baseline.	No
21	Table 1 Main inventory data per FU for transportation, pre-treatment and fast pyrolysis of poplar biomass (SS1-SS3).	Yes
21	Table 2 Main inventory data per FU for upgrading and product transportation (SS4-SS7).	Yes
21	Table 3 Mass and economic allocation factors for bio-oil production and upgrading.	No
21	Table 4 Environmental proﬁle of the gasoline and diesel products (results per FU).	No
21	Table 5 Process contribution (%) to the environmental proﬁle.	No
22	Table 1 Life cycle inventory of agricultural practices and inputs for both Danish and Italian casestudies [quantities are shown per hectare cultivated (ha); the unit “rep”refers to the num-	Yes
22	Table 2 Scenarios and the fertilisers and pesticides emissions models used	No
23	Table 1 Life cycle inventory (LCI) of the organic and conventional lettuce cultivation systemsat Anthemountas basin (Northern Greece) per hectare of lettuce cultivation.	Yes
23	Table 2 ReCiPe midpoint and endpoint impact categories ( PR/C19e, 2014 ).	No
24	Table 1 Complete environmental-Life Cycle Inventory.	Yes
24	Table 2 Life Cycle Cost (LCC) information of transit buses with alternative fuel options (2013 Dollars).	No
25	Table 1 Inventory characteristics of WTP stage per 1 km of travel.	Yes
25	Table 2 Estimated fuel consumption and fuel emissions per 1 km of travel (PTW stage).	No
26	Table 1 Bill of materials of the bus models.	Yes
26	Table 2 Polish gross electricity generation forecast by fuel [%].	No
26	Table 4 Description of the scenarios investigated in the bus ﬂeet electri ﬁcation case study on	No
27	Table 1 GHG emissions of EVs and ICEVs in some studies.	No
27	Table 2 General information on e-bus and conventional bus in Vietnam.	No
27	Table 3 Environmental inflows and outflows of the product systems.	Yes
27	Table 4 Life cycle impact assessment results of an e-bus and a diesel bus per one pkm.	No
27	Table 5 Comparative environmental points of an e-bus and a diesel bus.	No
28	Table 1 Life cycle inventory (Values were presented per functional unit).	Yes
28	Table 2 LCIA midpoint results (Values were presented per functional unit).	No
28	Table 3 Comparison of gas extraction and gas drainage production modes (Values were presented per functional unit).	No
29	Table 1 Chemical properties of coal.	No
29	Table 2 Mass balance of an underground coal mine.	No
29	Table 3 Life cycle inventory of energetic coal. From “rooms and pillars ”technique and jig	Yes
30	Table 1 Life cycle inventory (Only total consumption or emissions of data are shown).	Yes
31	Table 1 Assumed composition (dry basis) of feedstock delivered to the reﬁnery gate.	No
31	Table 2 Data sources for the life cycle inventory of lignocellulosic ethanol manufacture.	Yes
31	Table 3 Global inventory for lignocellulosic ethanol production.	Yes
31	Table 4 Assumptions about delivery activities.	No
32	Table 1 Summary of the covered well-to-tank processes.	No
32	Table 2 Input and output data of the butanol manufacturing unit process for 1 kg of ABE.	Yes
32	Table 3 Input and output data for passenger car transport per km using the butanol-gasoline blend	Yes
32	Table 4 Main environmental impacts of the steam production process per driven km,	No
32	Table 5 LCIA of the tank-to-wheel phase, based on data for 2018.	No
33	Table 1 Inventory of CDW recycling and disposal.	Yes
33	Table 2 Inventory of production of three recycled products.	Yes
33	Table 7 Normalisation results of three recycled products.	No
33	Table 8 The proportion of main materials in the environmental impact of key processes.	No
34	Table 1 LCI energy use and air emissions data efor electricity generation (GreenConcrete LCA tool).	Yes
34	Table 2 LCI data for the cement production in the country of origin and transportation to Singapore.	Yes
34	Table 3 LCI data for the aggregates production in the country of origin and transportation to Singapore.	Yes
35	Table 1 Inventory of main input ﬂows to the CdTe module manufacturing process	Yes
35	Table 2 Inventory of main input ﬂows to the CIS module manufacturing process	Yes
35	Table 3 Inventory of main input ﬂows to the BOS per square metre of PV module	Yes
36	Table 1 Key inputs and outputs for unit processes.	Yes
36	Table 2 Net present values (NPV) for a plant (100 t TS/d) using different processes.	No
37	Table1 Life cycle inventory of a 200W PV panel and a 280W PV panel.	Yes
37	Table 2 Life cycle inventory of a 6 kW wind turbine.	Yes
37	Table 3 Life cycle inventory of a 960 Ah lead-calcium alloy	Yes
37	Table 4. Life cycle inventory of a 65 kW diesel generator.	Yes
38	Table 1 Allocation factors for the products of coal-based methanol production.	No
38	Table 2 Impact categories for the CML2001 and Eco-indicator 99 (EI99) models.	No
38	Table 3 Life-cycle inventory for the production of 1 t of coal-based methanol.	Yes
38	Table 4 Integral environmental impact assessment result at the mid-point level.	No
38	Table 5 Environmental performance at the end-point level.	No
38	Table 6 Characteristic values for the worst-case values for the coal gasi ﬁcation technology	No
39	Table 1 Inputs and outputs related to 1 h for the analysed process of methanol and electricity co-production.	Yes
39	Table 2 Allocation factors a ifor methanol and electricity determined based on the amount (moles)	No
39	Table 3 A comparison of life cycle GHG emissions generated through the production of 1 kg ofmethanol.	No
40	Table 1 Inventory data.	Yes
40	Table 2 Life cycle assessment results for methanol production.	No
40	Table 3 Life cycle assessment results in comparison for metals utilized in catalysts.	No
40	Table 4 Life cycle assessment comparison for electricity generation sources.	No
41	Table 1 Life cycle inventory (per functional unit) of egg yolk powder production.	Yes
41	Table 2 Environmental impacts of different stages in egg yolk powder manufacturing.	No
42	Table 1 LCI data for the biorefinery systems.	Yes
42	Table 2 The properties of ethanol, gasoline, E10 and E85.	No
42	Table 3 LCI data for crude oil extraction, transportation, refinery, blending with ethanol, and final use.	Yes
42	Table 4 Speciﬁc chemical exergy of components involved in the processes.	No
43	Table 1 Sugarcane [12], molasses, ethanol production [4], gasoline consumption [13] and fuel ethanol requirement in India.	No
43	Table 2 Inventory of sugarcane farming for sugarcane production of 111.4 ton in NR and 88.2ton in WR to produce 1 ton of ethanol.	Yes
43	Table 3 Inventory of sugarcane (111.4 and 88.2 ton), molasses (5.0 and 4.0 ton) and ethanol (1 ton) transport in NR and WR.	Yes
43	Table 4 Inventory of sugar production for processing 111.4 (NR) and 88.2 (WR) ton sugarcanein mill to produce 1ton of ethanol.	Yes
43	Table 5 Inventory of ethanol production of 1 ton, blending 1 ton ethanol with gasoline.	Yes
43	Table 7 Mass, energy and market price for estimating product and co-products allocationfactor, for producing 1ton of ethanol.	No
43	Table 8 Process wise GHG emissions (kg CO 2-eq/ton of ethanol) in NR and WR.	No
43	Table 9 Process wise energy consumption (MJ/ton of ethanol) in NR and WR.	No
43	Table 10 Percent GHG emissions reduction and NER using E5 and E10 blends.	No
44	Table 1 List of inputs and outputs of the production of biodiesel from UCO.	Yes
45	Table 1 Inventory inputs of willow cultivation and harvesting.	Yes
45	Table 2 Inventory inputs of poplar cultivation and harvesting.	Yes
45	Table 3 Inventory inputs of logging residue cultivation and harvesting.	Yes
45	Table 4 Biomass transportation distances for power conversion systems.	No
45	Table 5 Inventory inputs of pyrolysis oil production from woody biomass feedstock.	Yes
45	Table 6 Plant size and efficiency of each power generation system.	No
45	Table 7 GHG emissions results of PyOil production from 4 biomass feedstocks.	No
46	Table 1 Life cycle inventory data to produce one ton of packaged canola edible oil.	Yes
47	Table 1 The composition of coke oven gas in this study.	No
47	Table 2 The inputs and outputs of COG-based methanol production.	Yes
47	Table 3 The inputs and outputs of coal to methanol production.	Yes
47	Table 4 The inputs and outputs of natural gas to methanol production.	Yes
47	Table 5 Comparative analysis of the three methanol routes in energy consumption and global warming potential.	No
47	Table 6 Scenario analysis of COG route with MP steam supplement from CDQ technology.	No
48	Table 1 Inventory data for the production and processing of one tonne of dry seaweed into biofuels.	Yes
49	Table 2 Data inventory for LDG-ethanol process.	Yes
49	Table 3 Data inventory for Corn-ethanol and Coal-ethanol.	Yes
50	Table 1 Input and output ﬂows of WS-EtOH production referred to the selected Functional Unit (FU=1 km).	Yes

## Sheet: Reference_list
Number	Title
1	Toward a Sustainable Impeller Production: Environmental Impact Comparison of Different Impeller Manufacturing Methods.
2	Environmental and economic potential of decentralised electrocatalytic ammonia synthesis powered by solar energy.
3	Life-cycle assessment of mineral and rapeseed oil in mobile hydraulic systems.
4	Life cycle sustainability assessment and circularity of geothermal power plants
5	Life cycle assessment of wind electricity generation: A comparative analysis.
6	Environmental impact assessment of zero waste approach for carbon fiber prepreg scraps.
7	The Trade-off Between Environmental Impacts in Water Recycling Systems Using Industrial Effluent.
8	Environmental Life Cycle Assessment of small water resource recovery facilities: Comparison of mechanical and lagoon systems.
9	Comparative LCA of an electric vehicle and an internal combustion engine vehicle using the appropriate power mix: the Italian case study.
10	Life cycle assessment of bio-methane and biogas-based electricity production from organic waste for utilization as a vehicle fuel
11	A review of the effectiveness of Life Cycle Assessment for gauging environmental impacts from cement production
12	Life cycle assessment of steel production in Poland: a case study
13	Life cycle assessment of steel in the ship recycling industry in Bangladesh
14	Life cycle assessment of steel-glued laminated bamboo (GluBam) hybrid truss in China
15	Life cycle assessment and water footprint evaluation of crude steel production: A case study in China
16	Impacts of aluminum production: A cradle to gate investigation using life-cycle assessment
17	Environmental and economic life cycle assessment of aluminum-silicon alloys production: a case study in China
18	Life cycle assessment of aluminum-silicon alloy production from secondary aluminum in China
19	Techno-economic and life cycle assessment of aluminum electrorefining from mixed scraps using ionic liquid
20	A cradle-to-grave life cycle assessment of high-voltage aluminum electrolytic capacitors in China
21	Life cycle assessment of transportation fuels from biomass pyrolysis
22	The influence of fertiliser and pesticide emissions model on life cycle assessment of agricultural products: The case of Danish and Italian barley
23	Life cycle assessment of organic versus conventional agriculture. A case study of lettuce cultivation in Greece
24	Optimization of transit bus fleet's life cycle assessment impacts with alternative fuel options
25	The life cycle assessment of alternative fuel chains for urban buses and trolleybuses
26	Life cycle assessment study on the public transport bus fleet electrification in the context of sustainable urban development strategy
27	Comparative life cycle impact assessment of electric and conventional bus in Vietnam
28	Life cycle assessment of underground coal mining in China
29	A life cycle assessment of the Brazilian coal used for electric power generation
30	Life cycle assessment of coal mines of diverse scales over time in China
31	Life cycle assessment of flax shives derived second generation ethanol fueled automobiles in Spain
32	Life cycle assessment of a farmed wood butanol-gasoline blend as an alternative transport fuel for passenger cars
33	Life cycle assessment of three typical recycled products from construction and demolition waste
34	Impact of Singapore's importers on life-cycle assessment of concrete
35	Life cycle assessment and energy pay-back time of advanced photovoltaic modules: CdTe and CIS compared to poly-Si
36	Environmental and economic life cycle assessment of energy recovery from sewage sludge through different anaerobic digestion pathways
37	Life cycle assessment and energy payback time of a standalone hybrid renewable energy commercial microgrid: A case study of Town Island in Hong Kong
38	Life-cycle assessment for coal-based methanol production in China
39	Environmental life cycle assessment of methanol and electricity co-production system based on coal gasification technology
40	Life cycle assessment of methanol production by natural gas route
41	Life cycle assessment of cleaning-in-place operations in egg yolk powder production
42	Environmental life cycle assessment of lignocellulosic ethanol-blended fuels: A case study
43	Life cycle assessment of fuel ethanol from sugarcane molasses in northern and western India and its impact on Indian biofuel programme
44	Life cycle assessment (LCA) and exergetic life cycle assessment (ELCA) of the production of biodiesel from used cooking oil (UCO)
45	Life cycle assessment of electricity generation using fast pyrolysis bio-oil
46	Life cycle assessment of canola edible oil production in Iran: A case study in Isfahan province
47	Life cycle assessment and economic analysis of methanol production from coke oven gas compared with coal and natural gas routes
48	Life cycle assessment of biofuel production from brown seaweed in Nordic conditions
49	Life cycle assessment of bio-fermentation ethanol production and its influence in China’s steeling industry
50	Life cycle assessment of wheat straw lignocellulosic bio-ethanol fuel in a local biorefinery prospective
