# Supplementary material for: From Literature to Knowledge Graphs: Automated Extraction and Retrieval of Life Cycle Assessment Data with Large Language Models
Source: Research Square preprint supplement (doi:10.21203/rs.3.rs-8633241/v1), 2026-01-27
Supplement: Supplementary file 4 [file f254e2b9c10efa52387eff73.docx]

**Appendix A: Supplementary Information**

**From Literature to Knowledge Graphs: Automated Extraction and Retrieval of Life Cycle Assessment Data with Large Language Models**

Zirui Tang1, Max Dreger2, Peijin Jiang1, Kourosh Malek2, Qingshi Tu1,*

1 Sustainable Bioeconomy Research Group, Department of Wood Science, Faculty of Forestry and Environmental Stewardship, University of British Columbia, Vancouver, Canada

2 Virtual Mind Laboratory, Forschungszentrum Juelich GmbH, Juelich, Germany

* Correspondence author email: [qingshi.tu@ubc.ca](mailto:qingshi.tu@ubc.ca)

Number of pages: 20

Number of figures: 5

Number of tables: 5

**Contents**

[1. Random forest classifier 3](#_Toc218516796)

[2. Prompt engineering 3](#_Toc218516797)

[3. Hyperparameter Settings 9](#_Toc218516798)

[4. Data extraction Streamlit user interface 9](#_Toc218516799)

[5. Data normalization 12](#_Toc218516800)

[6. Multi-agent query system 13](#_Toc218516801)

[7. Case study dataset 14](#_Toc218516802)

[8. Ground-truth dataset construction 15](#_Toc218516803)

[9. Case study results 16](#_Toc218516804)

[9.1 Common issues leading to incomplete LCI data extraction 16](#_Toc218516805)

[9.2 Analysis of LCAKG data 16](#_Toc218516806)

[**Reference 20**](#_Toc218516807)

# **Random forest classifier**

Random Forest Classifier (RFC) is an ensemble learning approach consisting of multiple decision trees, where the final class prediction is determined by majority voting across all individual tree outputs (Kulkarni & Sinha, 2013). In this study, we used the OpenAI embedding model text-embedding-3-smal to generate 1536-dimensional embeddings of extracted table titles, which were directly used as input features to train the model for binary classification: an instance was labeled as *true* if it represented an inventory table, and *false* otherwise. The hyperparameters of RFC were optimized using RandomizedSearchCV from the scikit-learn library (Pedregosa et al., 2018), which iteratively samples from a predefined grid of hyperparameter values to identify the combination yielding the highest performance on a validation set. The final configuration of the RFC included 150 decision trees (n_estimators=150), a maximum tree depth of five (max_depth=5), and regularization parameters (min_samples_split=10, min_samples_leaf=4). The model was trained on a human-annotated dataset comprising 156 data points, as shown in Supplementary data. The dataset was randomly split into 80% for training and 20% for testing We used recall, precision, and F1-score to evaluate the performance of RFC since they are commonly used evaluation metrics for text classification (Q. Li et al., 2022), as expressed in equation below.

, ,

where TP, FP, and FN denote the numbers of True Positive (Correctly identified), False Positives (Incorrectly identified), and False Negatives (Incorrectly Rejected), respectively.

To benchmark the embedding-based RFC, we compared it with two baseline approaches: keyword matching and prompt-based LLM classification. The keyword-based method identifies LCI tables by detecting predefined inventory-related terms in table titles (e.g., inventory, input, output, emission, energy, and raw material). The prompt-based approach employs GPT-4o with few-shot prompting to directly classify table titles as LCI or non-LCI. All methods were evaluated on the 20% test set using identical performance metrics to ensure a fair comparison.

# **Prompt engineering**

A prompt is a set of instructions provided to large language models (LLMs) to elicit task-specific responses (White et al., 2023). Prompts can be systematically developed through prompt engineering, which focuses on the design and optimization of prompts to effectively leverage LLMs across a broad range of applications (Giray, 2023). In this study, we adopt a few-shot prompting strategy and design each prompt using four core elements, as follows:

1. Role definition: A description that specifies the LLM as an assistant specialized in life cycle assessment (LCA), thereby constraining its response style and domain focus.
2. Context definition: External information of key LCA concepts and terminology that provides background knowledge to the model, helping reduce semantic ambiguity and improve extraction consistency.
3. Task instruction: Explicit instructions that define the extraction objective, scope, and formatting requirements, guiding the model toward the desired output.
4. Illustrative example: One or more reference examples that demonstrate the expected model behavior and output structure, enabling the LLM to learn implicit extraction patterns through in-context learning.

The prompts used in this study were developed through an iterative prompt refinement process, with the final versions illustrated in Figure S1 and S2.

|  |
| --- |
| **Figure S1.** Illustration of the prompts designed to guild the LLM in extracting LCI data from serialized tabular contexts through three steps: (1) table metadata extraction, (2) LCI input-output data extraction, and (3) data formatting. The illustration includes an example input context and the corresponding structured output. Alternative prompt versions can be constructed and adapted depending on specific research objectives. |
|  |
| **Figure S1 (continued).** |
|  |
| **Figure S1 (continued).** |

|  |
| --- |
| **Figure S2.** Illustration of the prompts designed to guild the LLM in extracting LCIA results and LCA modeling assumptions from paper context. The example includes the corresponding structured output formatted as a table. In this implementation, the prompt is configured to extract only global warming potential (GWP) results reported in the paper. Alternative prompt versions can be constructed and adapted depending on specific research objectives. |

# **Hyperparameter Settings**

Hypermeters determines the performance and efficiency of a retrieval-augmented generation (RAG) system. In our implementation, the hyperparameters used for data chunking, retrieval, and generation are summarized in Table S1.

| Table S1: Hyperparameter descriptions. | | |
| --- | --- | --- |
| **Parameter** | **Description** | **Value** |
| Chunk size | Token length of document chunks used to build the vector database | 3000 |
| Chunk overlap | Overlap between adjacent document chunks | 400 |
| Temperature | Sampling temperature controlling output randomness | 0 |
| Embedding model | Model used to generate vector embeddings | OpenAI text-embedding-3-small |
| Vector database | Vector database used for document indexing and retrieval | Chroma |
| LLM model | Large language model used for generation | OpenAI GPT-4o |
| Chain type | Strategy for combining retrieved documents | stuff |
| Memory type | Conversation memory used during multi-step process | ConversationBufferMemory |

# **Data extraction Streamlit user interface**

Streamlit is an open-source library that enables rapid development of interactive systems for AI applications. In this study, we integrate the proposed data extraction pipeline into a Streamlit-based user interface, allowing users to input the required parameters and execute the extraction process with minimal technical expertise. The interface design and workflow are illustrated in Figure S3, and a demonstration of system usage is shown in Figure S4.

| 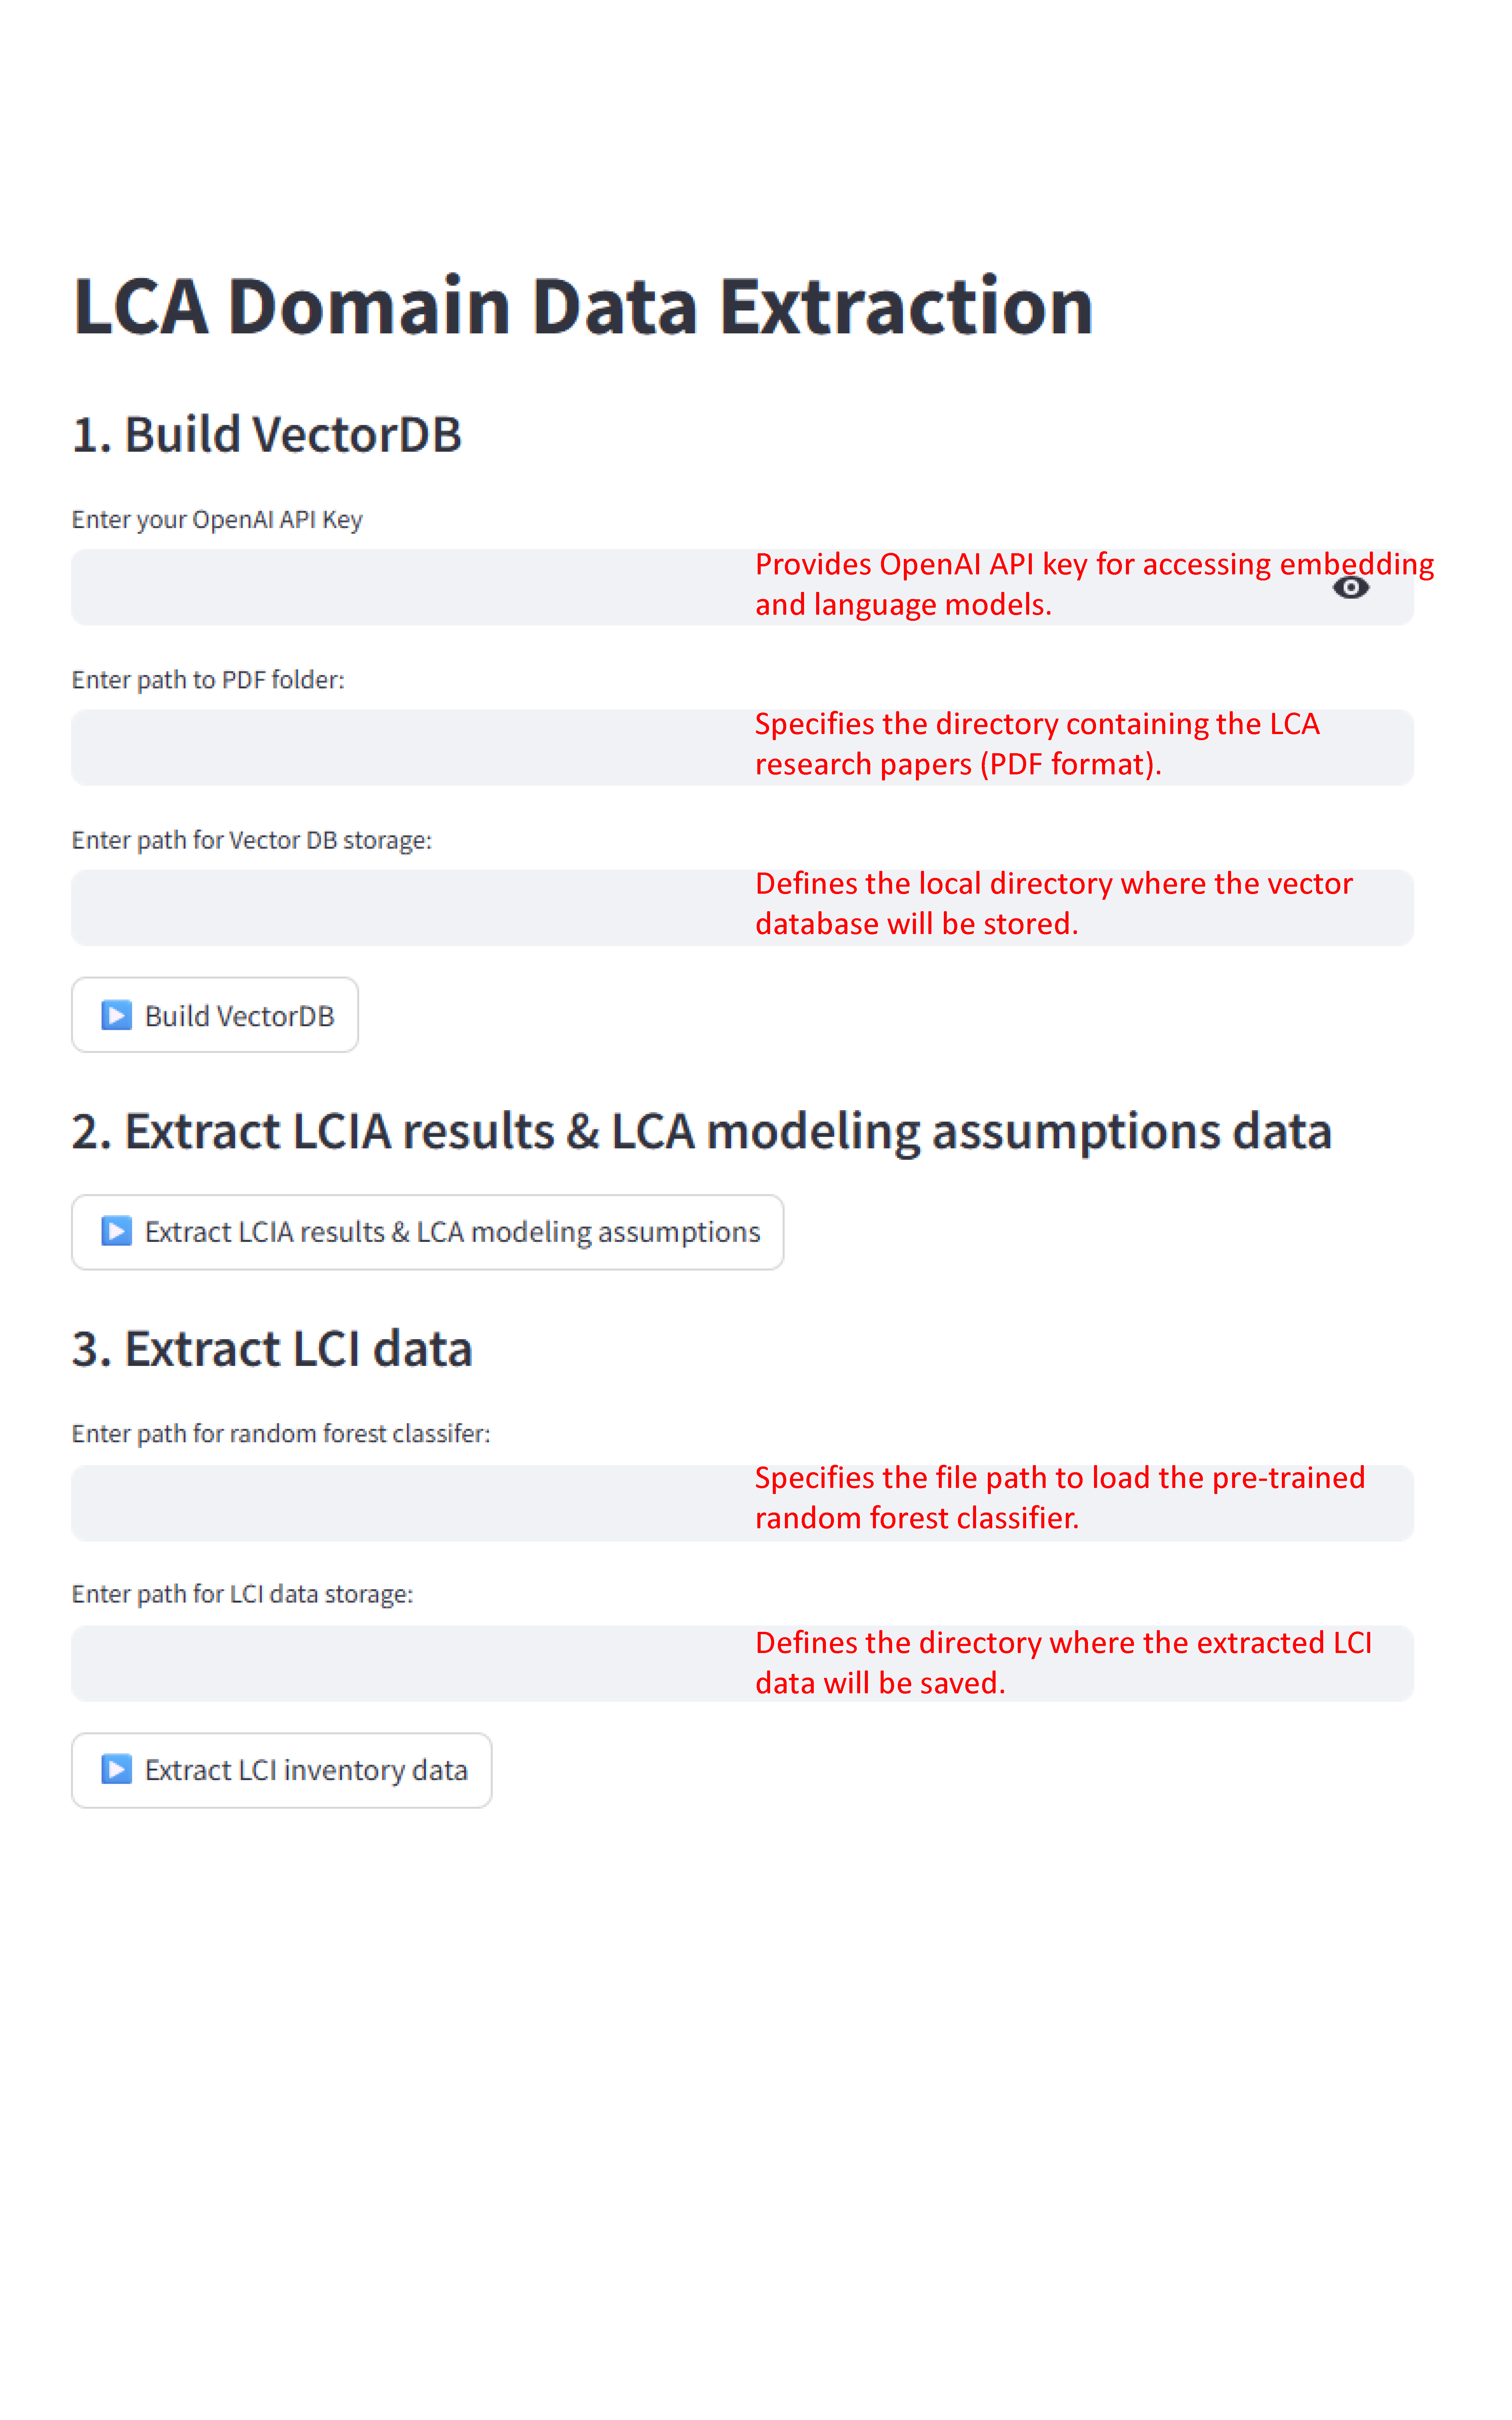 |
| --- |
| **Figure S3.** Streamlit-based user interface of the LCA domain data extraction system. |
| 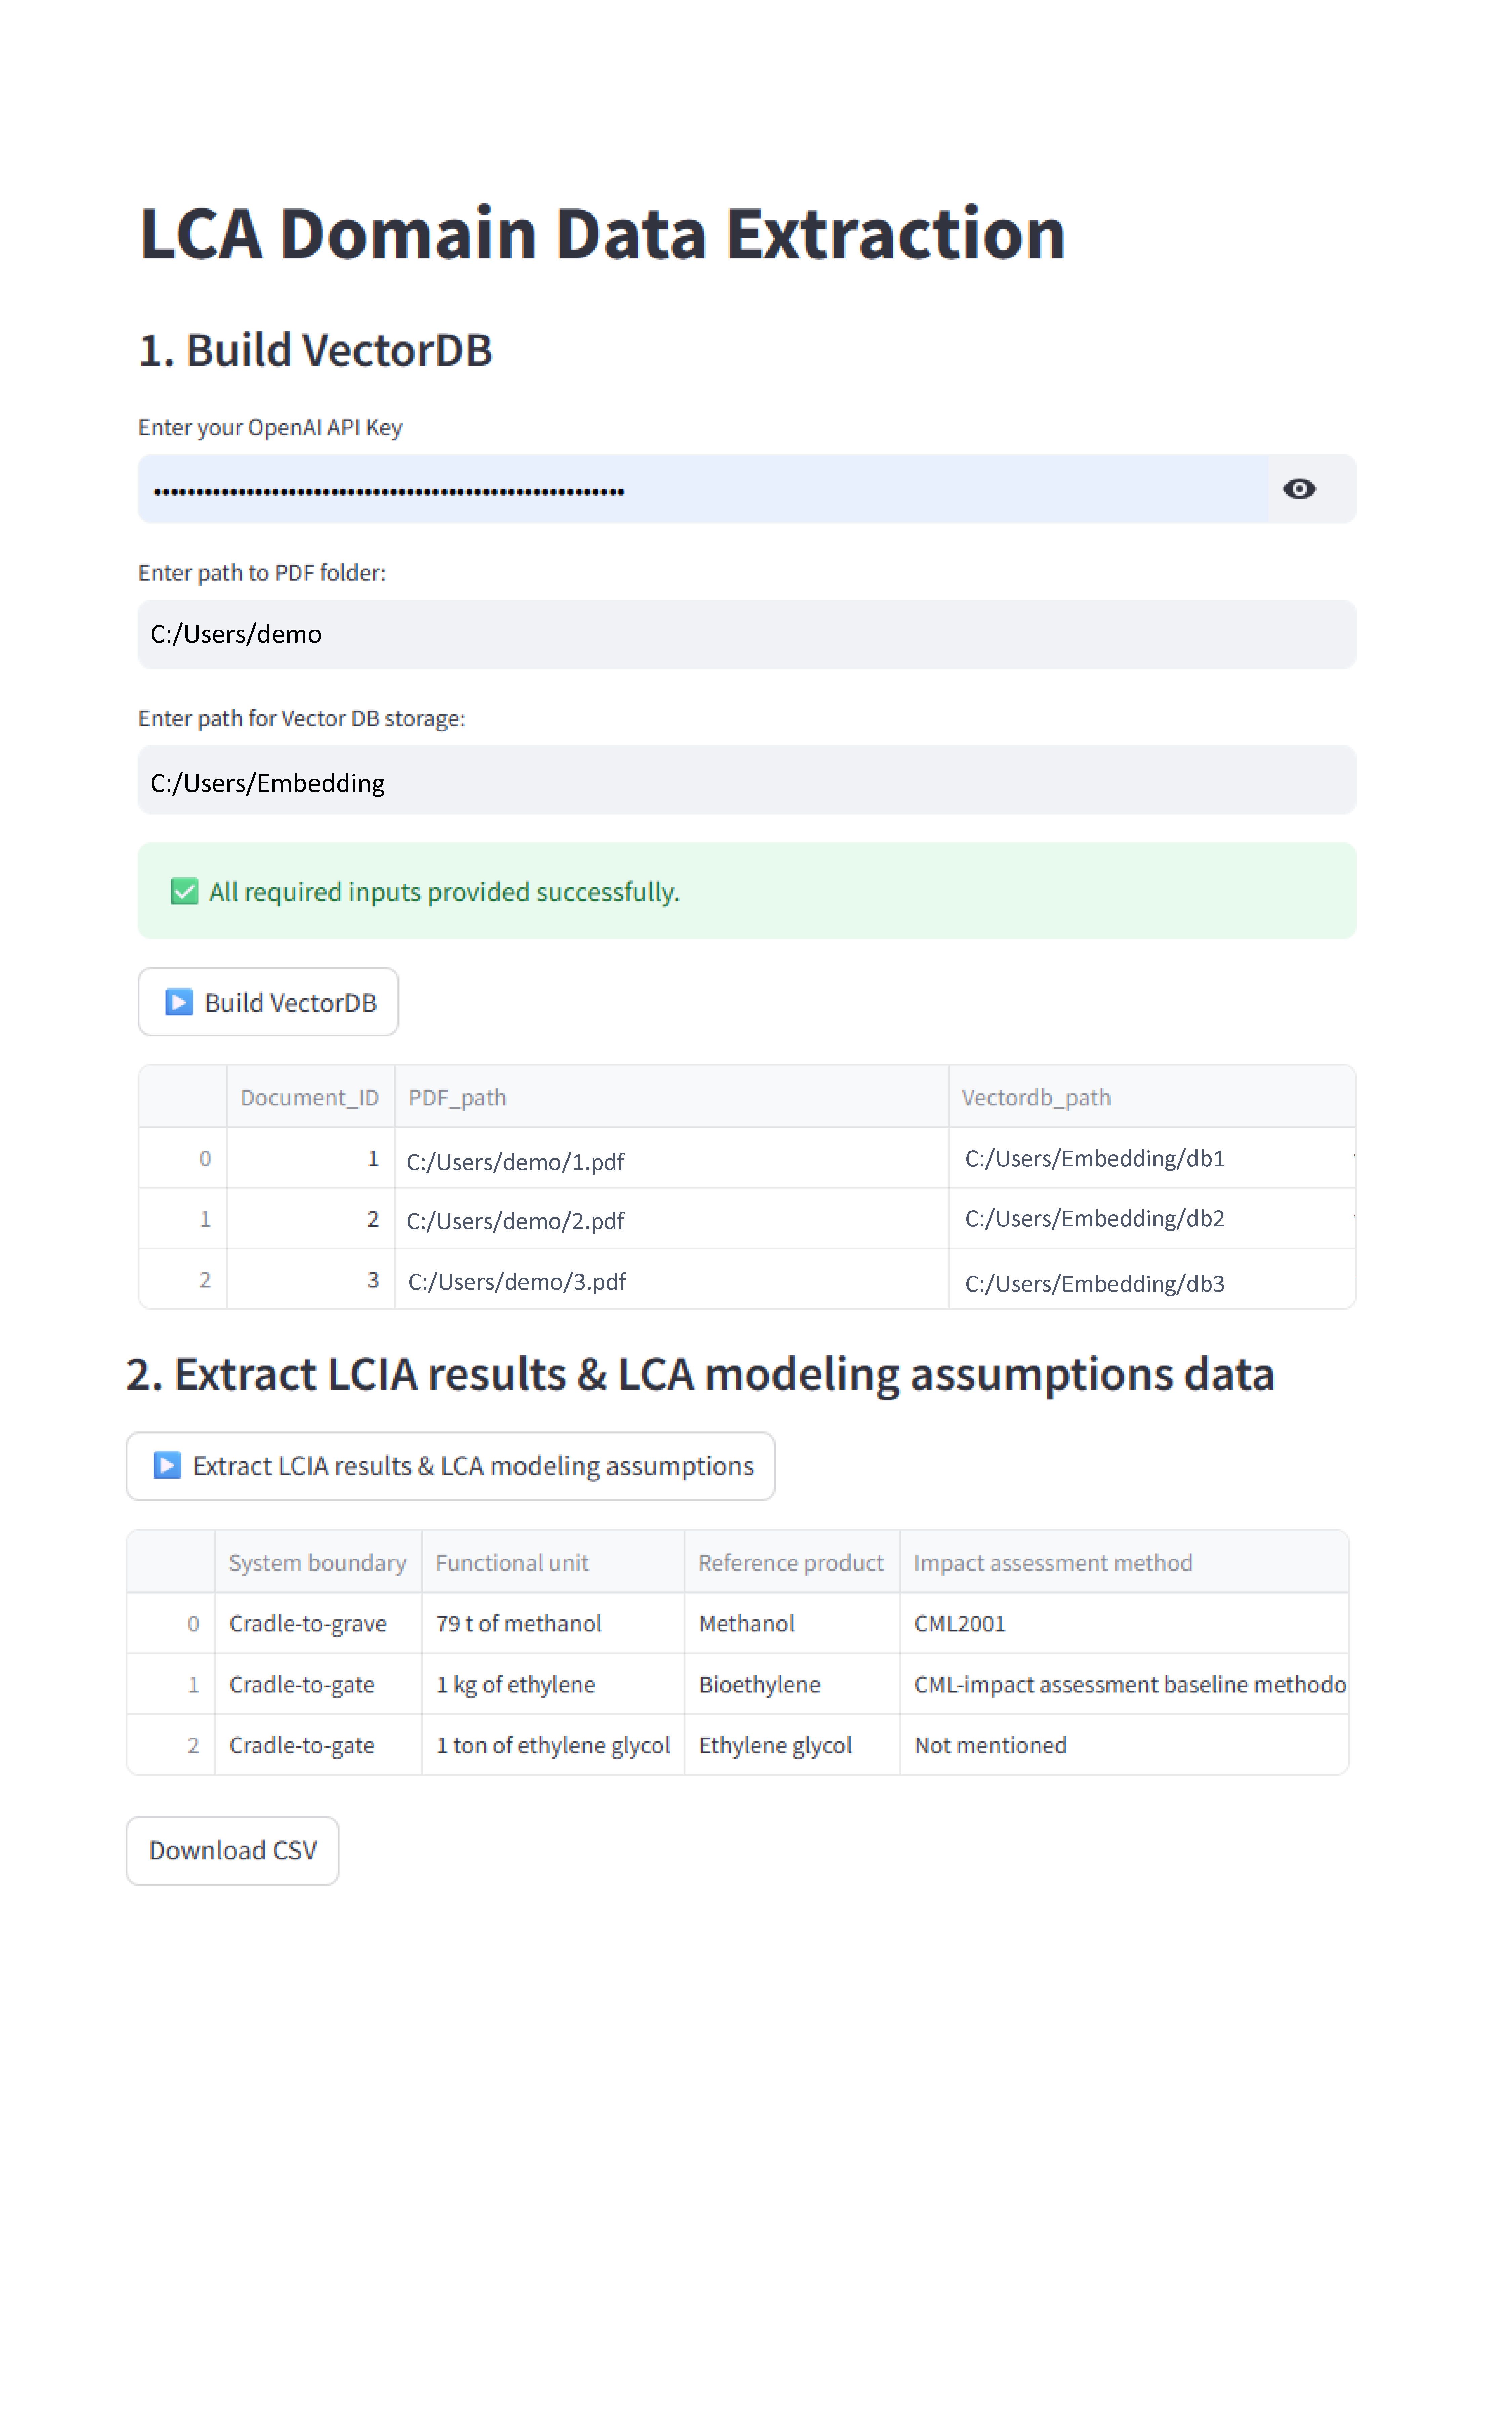 |
| **Figure S4.** Demonstration of using the Streamlit-based system for LCA domain data extraction. |
| 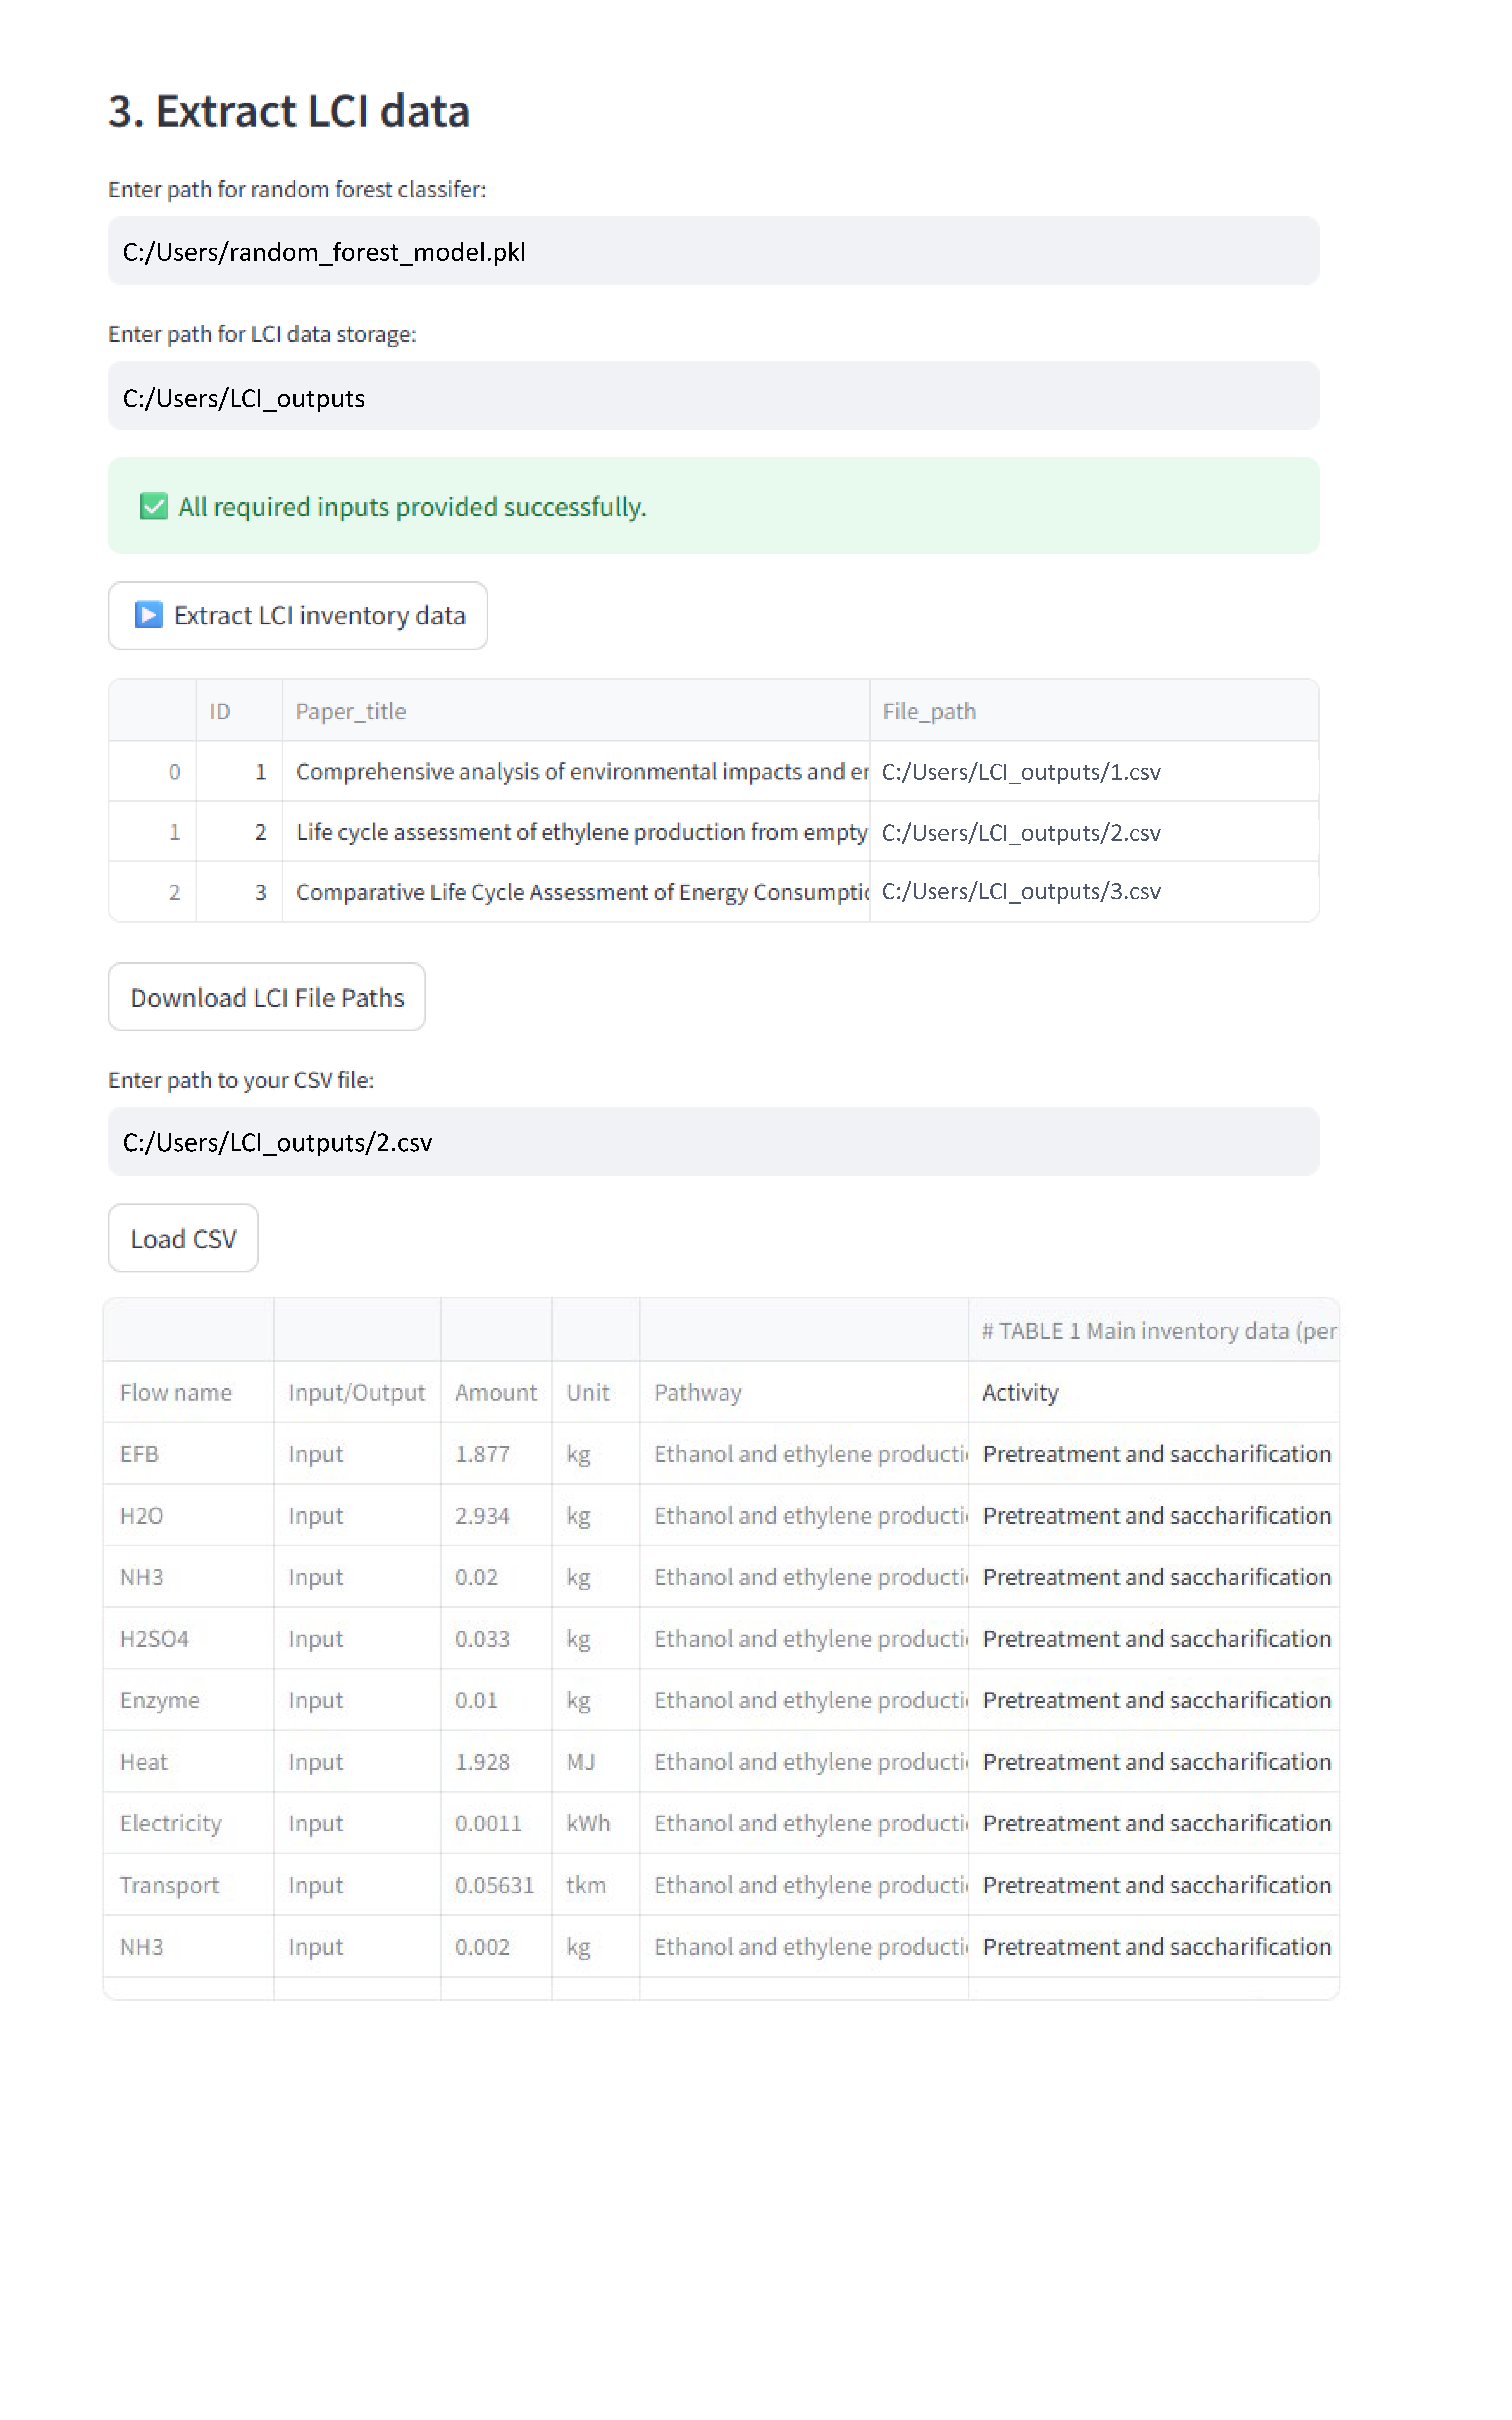 |
| **Figure S4 (continued)** |

# **Data normalization**

To enhance the interoperability and quality of the life cycle assessment–oriented knowledge graph (LCAKG), we applied a data normalization procedure to the extracted datasets. This process normalizes heterogeneous expressions, such as synonyms, abbreviations, and variant terminologies, commonly used across the LCA literature. The normalization rules implemented in this study are summarized in Table S2.

| **Table S2.** Data normalization rules applied in the LCAKG. | | |
| --- | --- | --- |
| **Data category** | **Field** | **Normalization rule** |
| LCI Inventory | Flow unit | Retain only the physical unit of each flow (e.g., kg, MJ) and remove reference-dependent expressions such as kg per kg product. |
| LCIA results | Impact category | Normalize all equivalent expressions (e.g., GWP, climate change impact) to standardized impact category names (e.g., Global warming potential) with the time horizon when available. |
|  | LCIA results unit | Normalize all LCIA results to impact indicator units expressed per unit of reference product (e.g., kg CO₂-eq per kg product). |
| LCA modeling assumptions | Functional unit | Standardize all functional unit descriptions to the format “N unit of reference product”. |
|  | System boundary | Map all reported system boundaries to one of three standardized categories: cradle-to-gate, gate-to-gate, or cradle-to-grave. |
|  | Reference product | Retain only the chemical name of the reference product (e.g., methanol) and remove additional descriptors (e.g., bio-based); convert molecular formula-based expressions (e.g., CH₃OH) to their corresponding chemical names. |

# **Multi-agent query system**

We implemented a graph-based multi-agent question-answering system (GraphMAQA) that integrates semantic similarity search with structured graph querying to enable robust retrieval from the LCAKG. All agents in the GraphMAQA system were implemented using OpenAI’s GPT-4o model with deterministic decoding (temperature = 0) to ensure reproducible query routing, rewriting, and Cypher generation. The maximum token length was set to 4,000 to accommodate schema-aware prompts and multi-hop reasoning over the LCAKG. Semantic similarity search was performed using OpenAI’s text-embedding-3-small, with separate vector indexes constructed for key node types (e.g., Activity, Reference_Product, LCIA_result, Flow). For each query, the top-1 nearest neighbor (k = 1) was retrieved from the selected indexes to minimize noise while preserving semantic alignment. The graph query execution was handled by LangChain’s GraphCypherQAChain with schema-constrained prompting and dangerous request filtering enabled to allow complex multi-hop Cypher generation. The workflow of the GraphMAQA is shown in Figure S5.

| 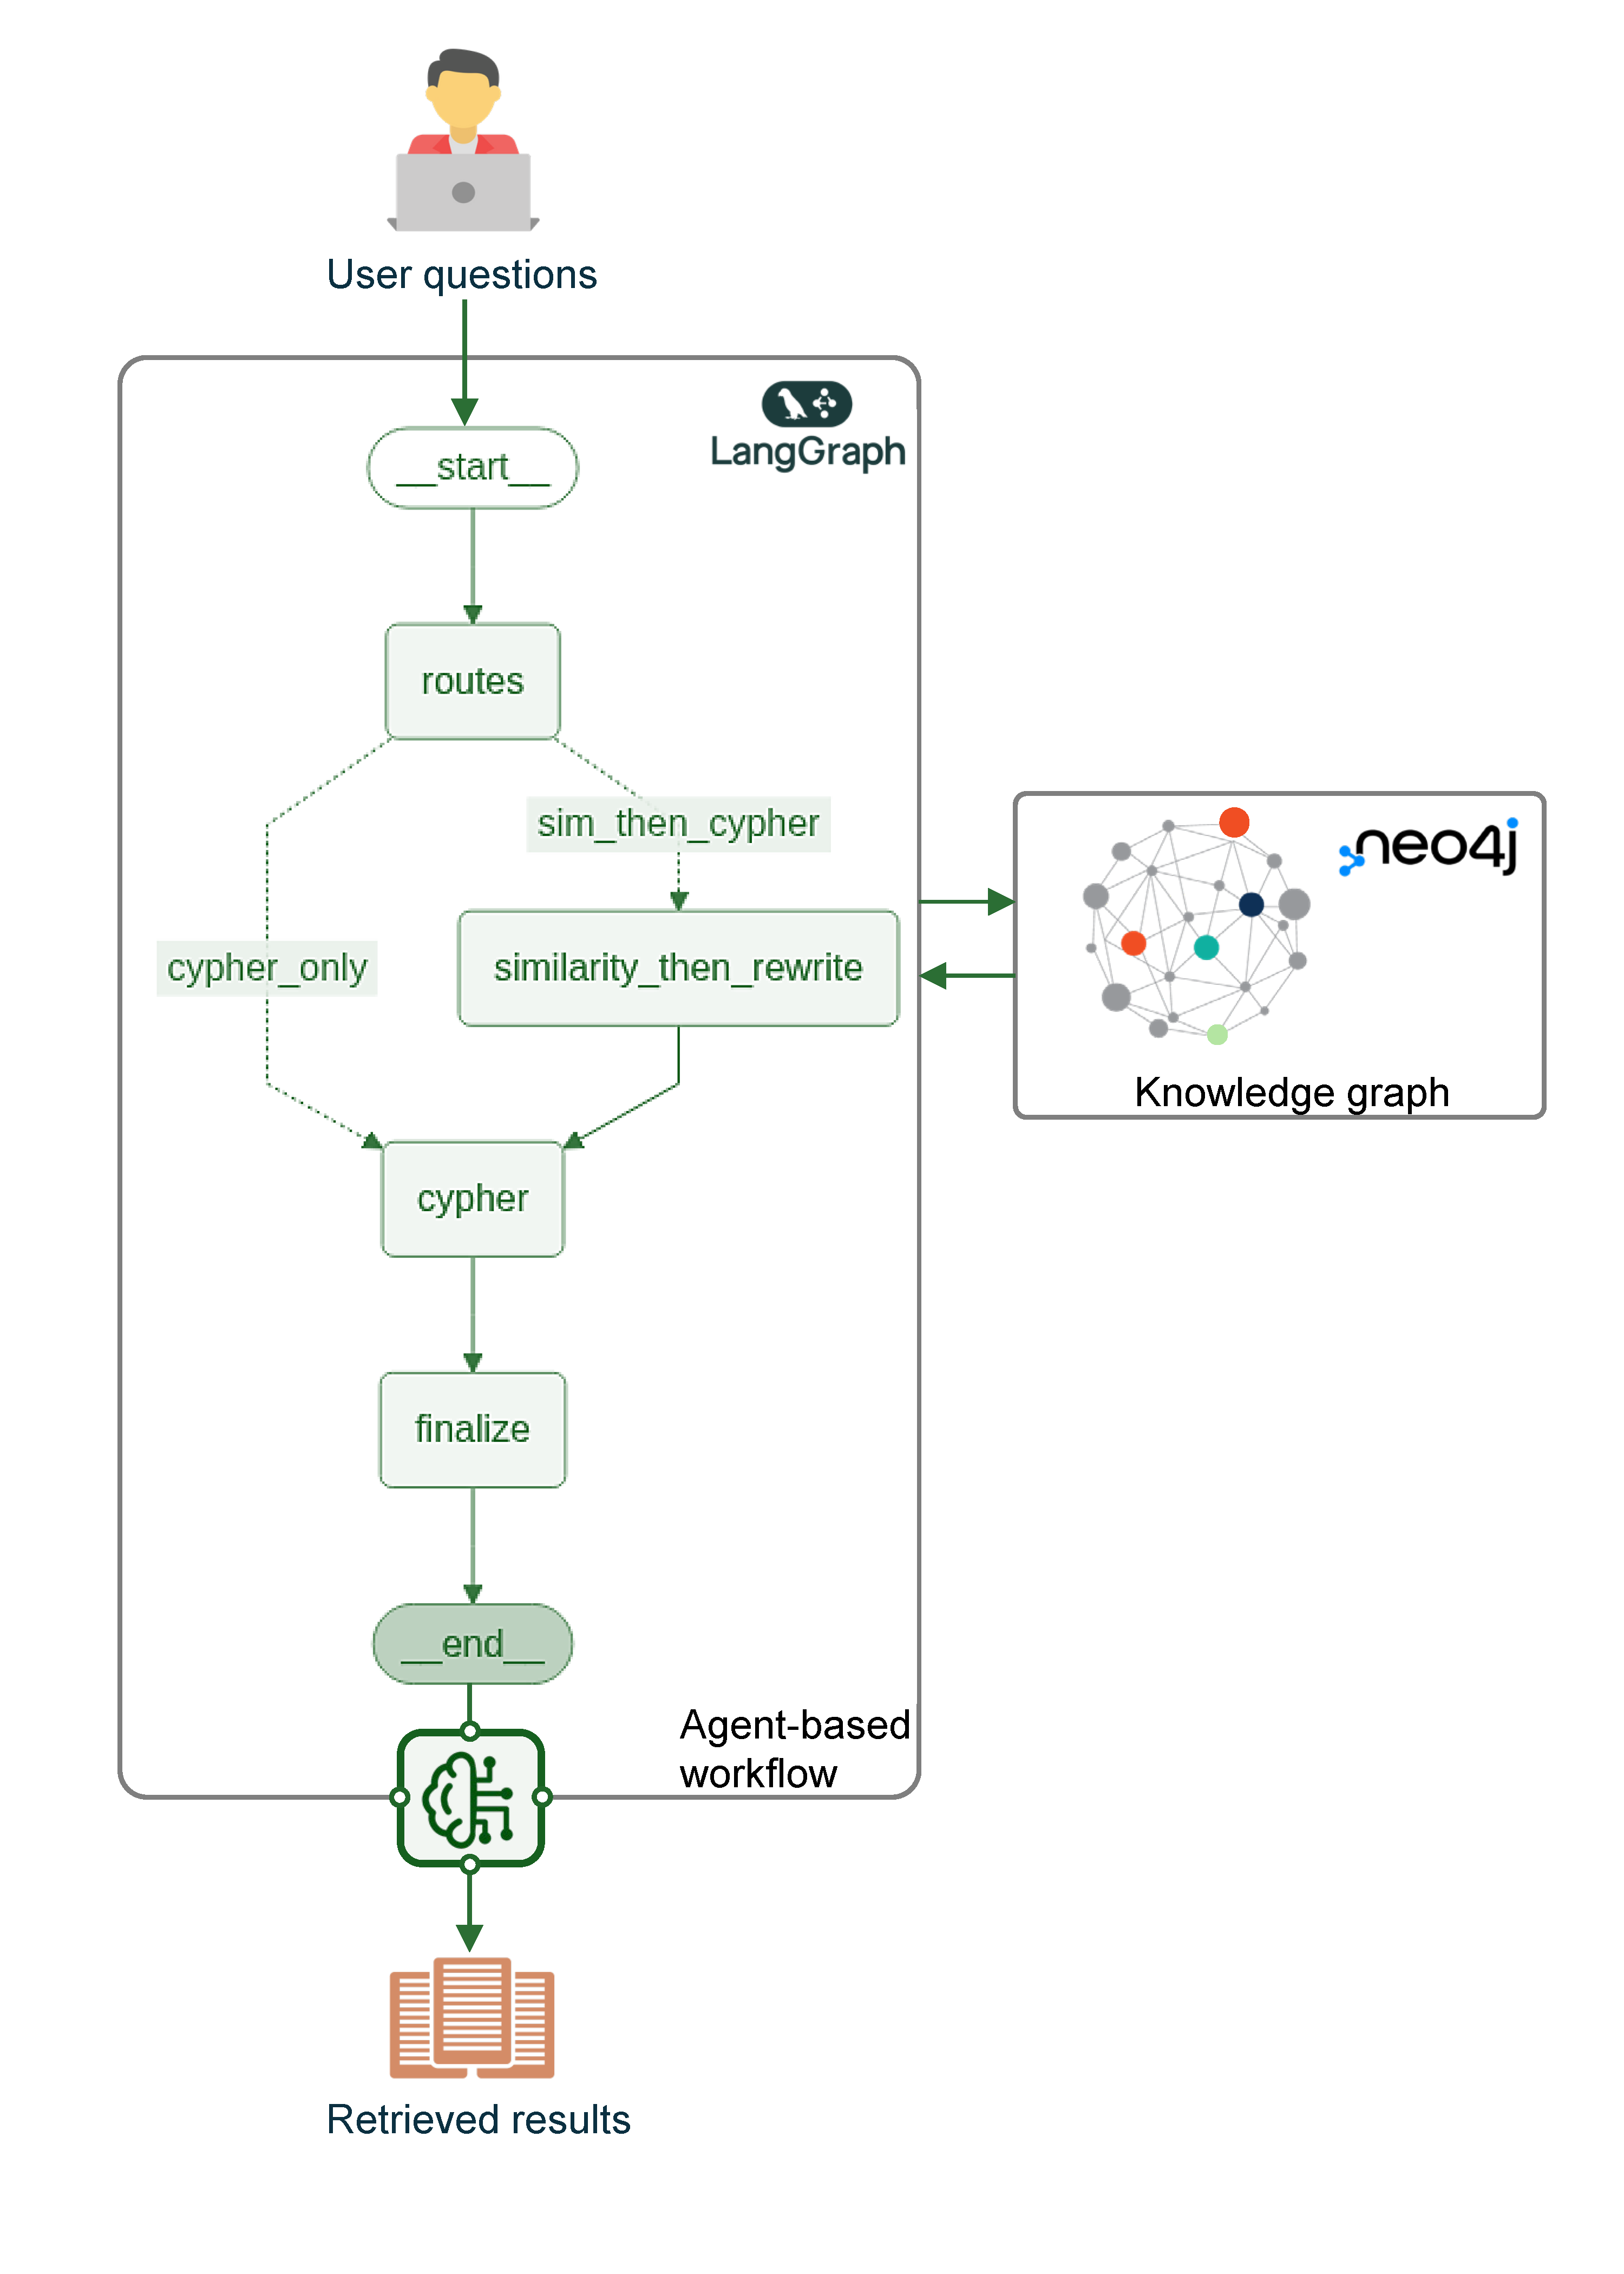 |
| --- |
| **Figure S5.** Architecture of the GraphMAQA agent-based retrieval workflow. |

# **Case study dataset**

This study conducted a case analysis of LCA studies on chemical production. The selected chemicals and the corresponding number of publications are summarized in Table S3. The full list of reference papers is provided in Supplementary Data S2.

| **Table S3.** Summary of reference products in the LCAKG. | | |
| --- | --- | --- |
| Chemicals | Molecular formula | # of LCA studies |
| Methanol | CH₃OH | 27 |
| Formic acid | CH₂O₂ | 4 |
| Ethylene | C₂H₄ | 11 |
| Ethylene oxide | C₂H₄O | 2 |
| Ethylene glycol | C₂H₆O₂ | 2 |
| Acetic acid | C₂H₄O₂ | 3 |
| Propylene | C₃H₆ | 3 |
| Propylene oxide | C₃H₆O | 1 |
| Propylene glycol | C₃H₈O₂ | 2 |
| Lactic acid | C₃H₆O₃ | 12 |
| Acrylic acid | C₃H₄O₂ | 2 |
| Acrolein | C₃H₄O | 1 |
| Acrylonitrile | C₃H₃N | 1 |
| Succinic acid | C₄H₆O₄ | 7 |
| Butanol | C₄H₁₀O | 4 |
| 1,3-butadiene | C₄H₆ | 7 |
| Itaconic acid | C₅H₆O₄ | 1 |
| Xylitol | C₅H₁₂O₅ | 3 |
| Furfural | C₅H₄O₂ | 2 |
| Levulinic acid | C₅H₈O₃ | 3 |
| 2,5-furan dicarboxylic acid | C₆H₄O₅ | 5 |
| Citric acid | C₆H₈O₇ | 1 |
| Sorbitol | C₆H₁₄O₆ | 1 |
| p-Xylene | C₈H₁₀ | 2 |
| **Total** |  | 107 |

# **Ground-truth dataset construction**

The ground-truth dataset was constructed from 65 full-text LCA studies on bio-based chemicals, identified through a systematic literature review (Tang et al., 2025). To minimize bias, detailed annotation rules were developed to guide human annotators, as summarized below:

1. **System boundary and functional unit**

If explicitly stated in the text, record the terms as reported. If not directly stated but can be inferred from contextual descriptions or figures (e.g., process flow diagram), record the inferred information and document the source. If neither explicit mention nor contextual inference is possible, label the entry as “Not mentioned”.

1. **Geographical scope**

Record geographic information only when it is explicitly stated in the text. If no geographic information is provided, label the entry as “Not mentioned”.

1. **LCIA results**

Extract LCIA results from all available sources (e.g., text, tables, and figures) and clearly document the original source. Record LCIA results using explicit key-value pairs to distinguish different cases or scenarios (e.g., Scenario 1: value, Scenario 2: value).

1. **LCI inventory data**

Transcribe inventory data exactly as reported in the original publication, without any numerical transformation or unit conversion (e.g., retain 1×10⁻⁴ rather than converting it to 0.0001).

**Note:** When a study reports multiple values for the same attribute (e.g., multiple system boundaries or functional units), record all reported instances.

# **Case study results**

## **9.1 Common issues leading to incomplete LCI data extraction**

| **Table S4.** Summary of common issues in LCI table extraction leading to incomplete data capture. | | |
| --- | --- | --- |
| **Issue** | **Description** | **Example** |
| Missing reference flows | Reference flows are not explicitly reported within the table body and are instead embedded in table titles or units, making automated extraction incomplete. | Table 3 in Morales et al. (2015), where the reference flow is implied by the unit (e.g., kg/kg lactic acid); Table 2 in Moussa et al. (2016), where the reference flow (1 kg Bio-SAC) is reported only in the table title. |
| Incomplete inventories | Inputs and outputs are reported in separate tables, requiring manual aggregation to construct a complete LCI for the product system. | Table 3 (inputs) and 4 (outputs) in Renó et al. (2011); Table 5 (inputs) and Table 6 (outputs) in Petrescu et al. (2016). |
| Non-machine-readable tables | Tables exhibit irregular layouts, hierarchical structures, merged cells, or inconsistent formatting that hinder reliable data extraction. | Table 3 in Li et al. (2018) , which presents a long, hierarchical table structure. |
| LCI data reported as figures | LCI data are presented graphically (e.g., in process flow diagrams). | Figure 2 in Schöppe et al. (2020), which reports input and output flows for HMF production. |

## **Analysis of LCAKG data**

| **Table S5.** Cypher queries used for LCAKG analysis | |
| --- | --- |
| **Query** | **Questions** |
| Query (1) | Analyze the publication years of LCA studies in the LCAKG. |
| Query (2) | Summarize the frequency of reported system boundaries across LCA studies. |
| Query (3) | Count the number of LCA studies that provide LCI data represented in the LCAKG. |
| Query (4) | Summarize cradle-to-gate GWP results for each chemical. |

**Query (1):**

MATCH (P:Paper_Title)

WHERE P.published_year IS NOT NULL

RETURN toInteger(P.published_year) AS publish_year, count(DISTINCT P) AS n_papers

ORDER BY publish_year;

**Result:**

| **Publish_year** | **n_papers** |
| --- | --- |
| 2011 | 1 |
| 2014 | 2 |
| 2015 | 6 |
| 2016 | 5 |
| 2017 | 8 |
| 2018 | 7 |
| 2019 | 10 |
| 2020 | 12 |
| 2021 | 22 |
| 2022 | 16 |
| 2023 | 11 |
| 2024 | 7 |

The 107 LCA studies included in the LCAKG were published between 2011 and 2024. Only one study was published in 2011, and fewer than five studies per year were published prior to 2015. A total of 22 studies in the LCAKG were published in 2021.

**Query (2):**

MATCH (p:Paper_Title)-[:Has_System_Boundary]->(sb:System_Boundary)

RETURN sb.name AS system_boundary,

count(DISTINCT p) AS n_papers

ORDER BY n_papers DESC;

**Result:**

| **system_boundary** | **n_papers** |
| --- | --- |
| "Cradle-to-gate" | 83 |
| "Not mentioned" | 12 |
| "Gate-to-gate" | 6 |
| "Cradle-to-grave" | 5 |
| "Cradle-to-gate and Cradle-to-grave" | 1 |

**Query (3):**

MATCH (p:Paper_Title)-[:Reports_LCI]->(a:Activity)

RETURN count(DISTINCT p) AS n_papers_reporting_LCI;

**Result:** 64

**Query (4):**

MATCH (p:Paper_Title)-[:Has_System_Boundary]->(sb:System_Boundary)

WHERE sb.name = "Cradle-to-gate"

MATCH (p)-[:ReportsLCIAResult]->(lcia:LCIA_Result)

MATCH (lcia)-[:Has_Impact_Category]->(ic:Impact_Category)

WHERE ic.name = "Global warming potential"

MATCH (ic)-[:Has_Impact_Category_Value]->(v:Impact_Category_Value)

MATCH (v)-[:Has_Impact_Category_Unit]->(u:Impact_Category_Unit)

WHERE u.name IN ["kg CO2-eq/kg", "t CO2-eq/t"]

MATCH (rp:Reference_Product)-[:Has_LCIA_Result]->(lcia)

WITH

rp.name AS chemical,

CASE

WHEN u.name = "kg CO2-eq/kg" THEN toFloat(v.value)

WHEN u.name = "t CO2-eq/t" THEN toFloat(v.value) / 1000.0

END AS gwp_value_kg_per_kg

RETURN chemical,

min(gwp_value_kg_per_kg) AS gwp_min,

percentileCont(gwp_value_kg_per_kg, 0.5) AS gwp_median,

max(gwp_value_kg_per_kg) AS gwp_max,

avg(gwp_value_kg_per_kg) AS gwp_mean;

**Result:**

| **Chemical** | **gwp_min (kgCO2-eq/kg)** | **gwp_median (kgCO2-eq/kg)** | **gwp_max (kgCO2-eq/kg)** | **gwp_mean (kgCO2-eq/kg)** |
| --- | --- | --- | --- | --- |
| Methanol | 0.00064 | 2.9 | 339 | 28.45 |
| Formic acid | -0.4 | 2.007 | 9325 | 1037.92 |
| Ethylene | -2.4 | 2.842 | 56 | 5.03 |
| Ethylene oxide | -0.5 | 3.62 | 4.11 | 2.41 |
| Acetic acid | 1.31 | 5.22 | 12.3 | 7.15 |
| Propylene | 0.0016 | 0.0056 | 0.012 | 0.0063 |
| Propylene glycol | 1.85 | 4.5 | 4.8 | 3.72 |
| Lactic acid | -4.9 | 3.025 | 8.98 | 2.32 |
| Acrolein | 45.2 | 47.45 | 49.7 | 47.45 |
| Succinic acid | 0.195 | 1.39 | 4.53 | 1.84 |
| Butanol | 1.03 | 5.5 | 9 | 4.95 |
| 1,3-Butadiene | -3.23 | -0.024 | 2.31 | -0.41 |
| Itaconic acid | 2.64 | 12.72 | 14.33 | 9.90 |
| Xylitol | 1.385 | 6.255 | 38.6 | 12.54 |
| FDCA | 2.8 | 61.46 | 118.42 | 60.89 |

**Query (1):** The 107 LCA studies included in the LCAKG were published between 2011 and 2024. Only one study was published in 2011, and fewer than five studies per year were published prior to 2015. The database includes the largest number of studies in 2021, with a total of 22 studies published that year.

**Query (2):** The results show that most studies adopted a cradle-to-gate system boundary (83 papers). Six studies adopted a gate-to-gate boundary, and five adopted a cradle-to-grave boundary. One study reported both cradle-to-gate and cradle-to-grave system boundaries, while 12 studies did not explicitly report system boundary information.

**Query (3):** A total of 64 out of 104 papers in the LCAKG were identified as reporting LCI data.

**Query (4)**: It provides an example of querying cradle-to-gate GWP results for selected chemicals, with all values normalized to a common unit of kg CO₂-eq per kg of product. The results reveal substantial variability in reported GWP values, reflecting differences in feedstocks, production pathways, system boundaries, and LCA modeling assumptions, as systematically analyzed in previous literature reviews (Tang et al., 2025). In several cases (e.g., formic acid, methanol, and FDCA), the large gap between median and maximum values indicates the presence of extreme outliers. The negative GWP values observed for chemicals (e.g., 1,3-butadiene) suggest the influence of biogenic carbon sequestration assumptions.

# **Reference**

Giray, L. (2023). Prompt Engineering with ChatGPT: A Guide for Academic Writers. *Annals of Biomedical Engineering*, *51*(12), 2629–2633. https://doi.org/10.1007/s10439-023-03272-4

Kulkarni, V., & Sinha, P. (2013). Random forest classifiers: A survey and future research directions. *International Journal of Advanced Computing*, *36*, 1144–1153.

Li, C., Bai, H., Lu, Y., Bian, J., Dong, Y., & Xu, H. (2018). Life-cycle assessment for coal-based methanol production in China. *Journal of Cleaner Production*, *188*, 1004–1017. https://doi.org/10.1016/j.jclepro.2018.04.051

Li, Q., Peng, H., Li, J., Xia, C., Yang, R., Sun, L., Yu, P. S., & He, L. (2022). A Survey on Text Classification: From Traditional to Deep Learning. *ACM Trans. Intell. Syst. Technol.*, *13*(2), 31:1-31:41. https://doi.org/10.1145/3495162

Morales, M., Dapsens, P. Y., Giovinazzo, I., Witte, J., Mondelli, C., Papadokonstantakis, S., Hungerbühler, K., & Pérez-Ramírez, J. (2015). Environmental and economic assessment of lactic acid production from glycerol using cascade bio- and chemocatalysis. *Energy & Environmental Science*, *8*(2), 558–567. https://doi.org/10.1039/C4EE03352C

Moussa, H. I., Elkamel, A., & Young, S. B. (2016). Assessing energy performance of bio-based succinic acid production using LCA. *Journal of Cleaner Production*, *139*, 761–769. https://doi.org/10.1016/j.jclepro.2016.08.104

Pedregosa, F., Varoquaux, G., Gramfort, A., Michel, V., Thirion, B., Grisel, O., Blondel, M., Müller, A., Nothman, J., Louppe, G., Prettenhofer, P., Weiss, R., Dubourg, V., Vanderplas, J., Passos, A., Cournapeau, D., Brucher, M., Perrot, M., & Duchesnay, É. (2018). *Scikit-learn: Machine Learning in Python* (arXiv:1201.0490). arXiv. https://doi.org/10.48550/arXiv.1201.0490

Petrescu, L., Fermeglia, M., & Cormos, C.-C. (2016). Life Cycle Analysis applied to acrylic acid production process with different fuels for steam generation. *Journal of Cleaner Production*, *133*, 294–303. https://doi.org/10.1016/j.jclepro.2016.05.088

Renó, M. L. G., Lora, E. E. S., Palacio, J. C. E., Venturini, O. J., Buchgeister, J., & Almazan, O. (2011). A LCA (life cycle assessment) of the methanol production from sugarcane bagasse. *Energy*, *36*(6), 3716–3726. https://doi.org/10.1016/j.energy.2010.12.010

Schöppe, H., Kleine-Möllhoff, P., Epple, R., Schöppe, H., Kleine-Möllhoff, P., & Epple, R. (2020). Energy and Material Flows and Carbon Footprint Assessment Concerning the Production of HMF and Furfural from a Cellulosic Biomass. *Processes*, *8*(1). https://doi.org/10.3390/pr8010119

Tang, Z., Zhang, W., & Tu, Q. (2025). Life cycle assessment of priority biochemicals: A review and meta-regression analysis. *Resources, Conservation and Recycling*, *215*, 108087. https://doi.org/10.1016/j.resconrec.2024.108087

White, J., Fu, Q., Hays, S., Sandborn, M., Olea, C., Gilbert, H., Elnashar, A., Spencer-Smith, J., & Schmidt, D. C. (2023). *A Prompt Pattern Catalog to Enhance Prompt Engineering with ChatGPT* (arXiv:2302.11382). arXiv. https://doi.org/10.48550/arXiv.2302.11382
